# Supplementary material for: A role for astrocytic miR-129-5p in frontotemporal dementia
Source: Transl Psychiatry. 2025 Apr 11;15:142. doi: 10.1038/s41398-025-03338-y (PMC11992244; doi:10.1038/s41398-025-03338-y)
Supplement: Supplementary file 2 — Supplemental tables [file 41398_2025_3338_MOESM2_ESM.xlsx]

## Sheet: Legends
Table	Description
Supplementary table 1	Phenotype data of Fonto temporal dementia (FTD) and Control cohort
Supplementary table 2	List of significantly deregulated microRNAs in FTD cohort (Frontal and Temporal brain region)
Supplementary table 3	Frontal and Temporal region common deregulated microRNAs
Supplementary table 4	Deregulated microRNA target genes (frontal and temporal brain regions)
Supplementary table 5	GO-term analysis of deregulated microRNAs target genes (Frontal and Temporal brain region)
Supplementary table 6	List of significantly deregulated microRNAs specific ot the mutation and brain region
Supplementary table 7	Deregulated microRNA target genes and correspoding GO terms specific to the mutaion and brain regions
Supplementary table 8	List of differentially expressed genes in PMN cultures treated with anti-miR-129-5p
Supplementary table 9	GO analysis based on the genes prestned in supplemental table 8
Supplementary table 10	List of differentially expressed genes in primary astrocytes treated with anti-miR-129-5p
Supplementary table 11	GO analysis based on the genes prestned in supplemental table 10
Supplementary table 12	Primer sequences used for qPCR and oligos detailed used for miR-129-5p qPCR and miR-129-5p knock down

## Sheet: Supplemental table 1
Health_status	Weight	Brain area	age	PMD	pH	gender		Number of samples/diagnosis	Only temporal lobe available
									Only frontal lobe availalbe
C9	0.25	Frontal	64	9.05	6.23	F		1
C9	0.23	Temporal	64	9.05	6.23	F
C9	0.22	Frontal	60	5.05	6.28	M		2
C9	0.2	Temporal	60	5.05	6.28	M
C9	0.25	Frontal	74	5.1	6.15	F		3
C9	0.24	Temporal	74	5.1	6.15	F
C9	0.2	Frontal	70	4.4	6.64	F		4
C9	0.25	Temporal	70	4.4	6.64	F
C9	0.33	Frontal	67	6.45	6.29	F		5
C9	0.2	Temporal	67	6.45	6.29	F
C9	0.29	Frontal	64	4.35	6.25	M		6
C9	0.22	Temporal	64	4.35	7.65	M
C9	0.25	Frontal	42	5.45	6.93	F		7
C9	0.26	Temporal	42	5.45	6.93	F
C9	0.22	Frontal	68	6.5	6.77	F		8
C9	0.2	Temporal	68	6.5	6.77	F
MAPT	0.27	Frontal	66	5	6.3	M		1
MAPT	0.26	Frontal	63	4.1	6.64	F		2
MAPT	0.2	Temporal	63	4.1	6.64	F
MAPT	0.23	Frontal	75	7.25	6.6	F		3
MAPT	0.2	Temporal	75	7.25	6.6	F
MAPT	0.27	Frontal	66	6.4	6.52	F		4
MAPT	0.22	Temporal	66	6.4	6.52	F
MAPT	0.22	Frontal	54	7.3	6.46	F		5
MAPT	0.23	Temporal	54	7.3	6.46	F
MAPT	0.22	Frontal	49	5.1	6.54	M		6
MAPT	0.19	Temporal	49	5.1	6.54	M
MAPT	0.27	Frontal	68	5.4	6.6	F		7
MAPT	0.2	Temporal	68	5.4	6.6	F
MAPT	0.2	Frontal	52	11.3	6.41	M		8
MAPT	0.23	Temporal	52	11.3	Na	M
MAPT	0.27	Frontal	51	4.25	6.1	M		9
MAPT	0.23	Temporal	51	4.25	6.1	M
MAPT	0.18	Frontal	60	5.23	6.3	M		10
MAPT	0.2	Temporal	60	5.23	6.3	M
MAPT	0.25	Frontal	64	7.3	5.91	F		11
MAPT	0.23	Temporal	64	7.3	5.91	F
MAPT	0.3	Frontal	64	6.25	6.38	M		12
MAPT	0.2	Temporal	64	6.25	6.38	M
MAPT	0.22	Frontal	60	4.4	6.45	M		13
MAPT	0.21	Temporal	60	4.4	6.45	M
GRN	0.25	Frontal	66	5.15	6.45	F		1
GRN	0.2	Temporal	66	5.15	6.45	F
GRN	0.27	Frontal	63	6.05	6.27	M		2
GRN	0.21	Temporal	63	6.05	6.27	M
GRN	0.25	Frontal	76	3.35	6.1	F		3
GRN	0.2	Temporal	76	3.35	6.1	F
GRN	0.18	Frontal	52	3.5	6.48	F		4
GRN	0.19	Temporal	52	3.5	6.48	F
GRN	0.24	Frontal	58	6	6.19	M		5
GRN	0.29	Temporal	58	6	6.19	M
GRN	0.27	Frontal	67	4.15	6.2	F		6
GRN	0.2	Temporal	67	4.15	6.2	F
NDC	0.23	Frontal	91	8	6.26	M		1
NDC	0.2	Temporal	91	8	6.26	M
NDC	0.25	Frontal	60	7.3	6.8	F		2
NDC	0.2	Temporal	60	v	6.8	F
NDC	0.3	Frontal	70	3.35	7.2	M		3
NDC	0.23	Temporal	70	3.35	7.2	M
NDC	0.23	Frontal	83	5.45	6.35	M		4
NDC	0.2	Temporal	83	5.45	6.35	M
NDC	0.26	Frontal	76	7.15	6.87	F		5
NDC	0.23	Temporal	76	7.15	6.75	F
NDC	0.3	Frontal	89	5.4	6.75	F		6
NDC	0.2	Temporal	89	5.4	6.75	F
NDC	0.29	Frontal	84	5.36	6.68	F		7
NDC	0.21	Temporal	84	5.36	6.68	F
NDC	0.25	Frontal	82	5.5	6.57	M		8
NDC	0.21	Temporal	85	7.05	NA	F		9
NDC	0.2	Temporal	82	4.4	6.04	F		10
NDC	0.24	Temporal	83	4.35	6.25	M		11
NDC	0.28	Temporal	84	6.15	6.23	M		12
NDC	0.23	Temporal	49	7.15	6.87	F		13
NDC	0.26	Frontal	87	7	6.92	F		14
NDC	0.23	Temporal	75	5.5	6.1	F		15
NDC	0.2	Temporal	84	7.3	5.91	F		16

## Sheet: Supplemental table 2
List of significantly deregulated microRNAs in FTD cohort (Frontal and Temporal brain region)
C9ORF_Frontal region									GRN_Frontal region									MAPT_Frontal region								C9ORF_Temporal region									GRN_Temporal region									MAPT_Temporal region
miR	baseMean	log2FoldChange	FC	lfcSE	stat	pvalue	padj		miR	baseMean	log2FoldChange	FC	lfcSE	stat	pvalue	padj		miR	baseMean	log2FoldChange	lfcSE	stat	pvalue	padj		miR	baseMean	log2FoldChange	FC	lfcSE	stat	pvalue	padj		miR	baseMean	log2FoldChange	FC	lfcSE	stat	pvalue	padj		miR	baseMean	log2FoldChange	FC	lfcSE	stat
miR-144-5p	752.594	1.64713	3.13211	0.394478	4.17548	2.97365e-05	0.00042205		miR-10a-5p	2093.24	1.51915	2.86622	0.618812	2.45495	0.0140905	0.0748112		hsa-miR-5701	254.274	1.31839	0.218331	6.03849	1.55563e-09	1.01505e-07		hsa-miR-132-3p	2353.06	-0.813279	0.569087	0.199393	-4.07878	4.52736e-05	0.0318273		hsa-miR-577	223.7	-2.2614	0.208569	0.667164	-3.38958	0.000700005	0.0379688		miR-151a-5p miR-144-3p miR-142-3p miR-145-5p miR-374b-5p miR-29c-3p miR-19a-3p miR-194-5p miR-34a-5p miR-345-5p let-7g-5p let-7b-5p miR-192-5p miR-338-3p miR-191-5p miR-223-3p miR-106a-5p miR-502-3p miR-144-5p miR-199a-5p	223.7	-1.51364	0.350226	0.476569	-3.17613
miR-5701	254.274	1.50314	2.83459	0.207038	7.2602	3.86527e-13	4.05853e-11		miR-5683	139.434	1.28584	2.43824	0.448572	2.86652	0.00415016	0.0410192		hsa-miR-199a-3p	3949.53	0.912695	0.355411	2.568	0.0102287	0.0702549		hsa-miR-129-1-3p	533.206	-0.964608	0.512418	0.259897	-3.7115	0.000206034	0.0362105		hsa-miR-450a-5p	242.975	-1.03771	0.487101	0.313167	-3.31359	0.000921071	0.0379688		hsa-miR-219a-5p	469.782	-1.39352	0.380636	0.416104	-3.34896
miR-144-3p	1194.08	1.3485	2.54648	0.431849	3.12262	0.00179246	0.0128324		miR-150-5p	924.429	0.828247	1.77553	0.141265	5.86307	4.54395e-09	1.94027e-06		hsa-miR-199b-3p	3949.53	0.912695	0.355411	2.568	0.0102287	0.0702549		hsa-miR-146b-5p	7526.91	-0.683794	0.622526	0.176515	-3.87385	0.000107127	0.0362105		hsa-miR-132-5p	2676.36	-0.995259	0.501646	0.272264	-3.6555	0.000256685	0.0379688		hsa-miR-584-5p	1151.86	-1.37567	0.385373	0.389106	-3.53547
miR-16-2-3p	129.186	1.30111	2.46418	0.298434	4.35979	1.30185e-05	0.000256302		miR-376a-3p	229.677	0.634237	1.55212	0.200462	3.16387	0.00155684	0.0201445		hsa-miR-16-2-3p	129.186	0.854606	0.318887	2.67997	0.00736295	0.0565215		hsa-miR-369-3p	796.711	0.556092	1.47028	0.148313	3.74946	0.000177217	0.0362105		hsa-miR-129-1-3p	533.206	-0.965957	0.511939	0.238198	-4.05528	5.00751e-05	0.0162243		hsa-miR-6842-3p	502.546	-1.33341	0.39683	0.355227	-3.75368
miR-199a-3p	3949.53	1.25957	2.39425	0.351008	3.58845	0.000332655	0.00308195		miR-126-3p	12206	0.570424	1.48496	0.147226	3.87448	0.000106852	0.00506956		hsa-miR-150-5p	924.429	0.75256	0.129347	5.81817	5.94962e-09	3.45078e-07		hsa-miR-129-5p	46066.9	-0.593185	0.662878	0.174962	-3.39037	0.000697981	0.0817801		hsa-miR-548o-3p	219.469	-0.961388	0.513563	0.293518	-3.2754	0.00105513	0.0402192		hsa-miR-582-3p	2718.37	-1.3279	0.398347	0.28456	-4.66651
miR-199b-3p	3949.53	1.25957	2.39425	0.351008	3.58845	0.000332655	0.00308195		miR-7-5p	4169.4	0.52132	1.43527	0.203929	2.55638	0.0105768	0.0664162		hsa-miR-19a-3p	454.428	0.709806	0.170869	4.15409	3.26589e-05	0.000774906		hsa-miR-212-5p	208.681	-0.759966	0.59051	0.229439	-3.31228	0.000925401	0.0929367		hsa-miR-212-5p	208.681	-0.887082	0.540707	0.236656	-3.7484	0.000177964	0.0379688		hsa-miR-219a-2-3p	24371.9	-1.30978	0.403381	0.428829	-3.05433
miR-451a	16741.8	1.16427	2.2412	0.441766	2.63549	0.00840149	0.0420075		miR-299-3p	227.264	0.512334	1.42636	0.158405	3.23432	0.00121931	0.0191477		hsa-miR-376a-5p	282.516	0.610649	0.135357	4.51139	6.44051e-06	0.00022413											hsa-miR-548av-3p	318.933	-0.866398	0.548515	0.254928	-3.3986	0.000677308	0.0379688		hsa-miR-151a-3p	74229.4	-1.02601	0.491066	0.240666	-4.26321
miR-150-5p	924.429	0.905315	1.87295	0.126346	7.16539	7.75637e-13	6.10814e-11		miR-363-3p	2568.31	0.494511	1.40884	0.179794	2.75043	0.00595178	0.0470632		hsa-miR-423-3p	4205.01	0.594775	0.0775651	7.66808	1.74591e-14	4.55683e-12											hsa-miR-192-5p	1882.36	-0.761608	0.589838	0.225735	-3.3739	0.000741104	0.0379688		hsa-miR-1250-5p	125.678	-0.963147	0.512937	0.360543	-2.67138
miR-142-3p	173.014	0.832327	1.78055	0.239737	3.47184	0.000516904	0.00465213		miR-383-5p	473.121	0.488262	1.40275	0.17144	2.84801	0.00439934	0.0413557		hsa-miR-19b-3p	3840.36	0.593319	0.156363	3.7945	0.000147943	0.00275808											hsa-miR-132-3p	2353.06	-0.685004	0.622004	0.198354	-3.45345	0.000553463	0.0379688		hsa-miR-542-3p	275.566	-0.942644	0.520279	0.31279	-3.01366
miR-1247-5p	151.005	0.80818	1.751	0.223381	3.61794	0.00029696	0.00283462		miR-381-3p	4744.75	0.482286	1.39696	0.191906	2.51314	0.0119663	0.0699944		hsa-miR-210-3p	246.928	0.487893	0.177061	2.75551	0.00586	0.0485543											hsa-miR-146b-3p	182.837	-0.650025	0.637269	0.194526	-3.34158	0.000833021	0.0379688		hsa-miR-1224-5p	125.286	-0.898437	0.536468	0.316595	-2.83781
miR-145-5p	1302.88	0.761251	1.69496	0.308401	2.46838	0.0135726	0.0593803		miR-660-5p	732.063	0.472549	1.38756	0.148993	3.17162	0.0015159	0.0201445		hsa-miR-30c-2-3p	196.907	0.467277	0.112398	4.15733	3.21986e-05	0.000774906											hsa-miR-146b-5p	7526.91	-0.626771	0.647624	0.177604	-3.52903	0.000417085	0.0379688		hsa-miR-212-5p	208.681	-0.896194	0.537302	0.22126	-4.05041
miR-19a-3p	454.428	0.72583	1.65385	0.167892	4.3232	1.5378e-05	0.000284945		miR-19b-3p	3840.36	0.453331	1.3692	0.158467	2.86072	0.0042268	0.0410192		hsa-miR-99a-3p	429.222	0.442946	0.0937671	4.72389	2.31372e-06	9.29047e-05											hsa-miR-129-5p	46066.9	-0.578308	0.669749	0.180599	-3.20217	0.00136398	0.0491032		hsa-miR-338-3p	4775.62	-0.879958	0.543383	0.35972	-2.44623
miR-378a-3p	4197.2	0.690602	1.61396	0.163078	4.23479	2.28765e-05	0.000351516		miR-19a-3p	454.428	0.452275	1.3682	0.174151	2.59704	0.0094032	0.062737		hsa-miR-455-5p	125.718	0.420081	0.17056	2.46295	0.0137799	0.0826797											hsa-miR-150-5p	438.586	0.698711	1.62305	0.198776	3.51507	0.00043964	0.0379688		hsa-miR-212-3p	115.105	-0.875148	0.545198	0.308397	-2.83773
miR-148a-3p	6646.24	0.622969	1.54004	0.257044	2.42359	0.0153681	0.0649792		miR-32-5p	369.042	0.450887	1.36688	0.161404	2.79353	0.00521362	0.0436529		hsa-miR-326	328.492	0.41932	0.126316	3.3196	0.000901476	0.0101198											hsa-miR-106a-5p	269.773	0.87253	1.83087	0.214659	4.06473	4.80889e-05	0.0162243		hsa-miR-2682-5p	1291.53	-0.854037	0.553235	0.209576	-4.07506
miR-19b-3p	3840.36	0.622475	1.53951	0.152746	4.07522	4.59715e-05	0.000591062		miR-137	1320.66	0.450525	1.36654	0.139657	3.22594	0.00125559	0.0191477		hsa-miR-383-5p	473.121	0.402229	0.152946	2.62987	0.00854174	0.0627998											hsa-miR-10b-5p	223.889	1.13969	2.20334	0.332529	3.42734	0.000609516	0.0379688		hsa-miR-380-5p	120.043	-0.852018	0.554009	0.184794	-4.61063
miR-142-5p	3335.99	0.619263	1.53609	0.254195	2.43618	0.0148433	0.0631844		miR-1249-3p	577.45	0.450023	1.36606	0.18056	2.49238	0.0126891	0.0719982		hsa-miR-582-3p	562.551	0.390293	0.109519	3.56369	0.000365683	0.00544604											hsa-miR-3065-5p	102.253	1.37563	2.59481	0.414693	3.31722	0.000909172	0.0379688		hsa-miR-129-1-3p	533.206	-0.833127	0.561311	0.267283	-3.11702
miR-106b-3p	305.898	0.594802	1.51027	0.185429	3.2077	0.001338	0.0100382		miR-374a-3p	1061.23	0.439153	1.35581	0.139605	3.14568	0.00165701	0.0208101		hsa-miR-28-5p	888.731	0.373949	0.10484	3.56685	0.000361297	0.00544604																				hsa-miR-34c-5p	557.12	-0.816311	0.567892	0.249007	-3.27826
miR-423-3p	4205.01	0.594148	1.50958	0.0758031	7.83805	4.57604e-15	9.60968e-13		miR-369-3p	410.867	0.436575	1.35339	0.159554	2.73623	0.00621481	0.0482495		hsa-miR-28-3p	4908.08	0.368883	0.140135	2.63233	0.00848009	0.0627998																				hsa-miR-370-3p	5436.61	-0.753247	0.593267	0.271485	-2.77455
miR-155-5p	230.517	0.566603	1.48103	0.207264	2.73372	0.00626227	0.0330772		miR-99a-3p	429.222	0.387292	1.30794	0.149819	2.58507	0.00973588	0.0629882		hsa-miR-660-5p	732.063	0.365276	0.0933535	3.91283	9.12219e-05	0.00176362																				hsa-miR-132-3p	2353.06	-0.725071	0.604967	0.190386	-3.80843
miR-378c	140.043	0.563927	1.47829	0.19366	2.91195	0.00359182	0.0217581		miR-29c-3p	10185	0.38576	1.30655	0.117953	3.27047	0.0010737	0.0183388		hsa-miR-532-5p	764.131	0.355441	0.11566	3.07314	0.00211817	0.022565																				hsa-miR-431-3p	462.983	-0.714862	0.609264	0.179695	-3.97819
miR-455-5p	125.718	0.555856	1.47004	0.160864	3.45543	0.000549409	0.00480733		miR-376a-5p	282.516	0.381134	1.30237	0.149751	2.54511	0.0109242	0.0676033		hsa-miR-30e-5p	34912.2	0.331035	0.0998114	3.31661	0.000911173	0.0101198																				hsa-miR-379-5p	15584.8	-0.694831	0.617782	0.19011	-3.65488
miR-376a-5p	282.516	0.55294	1.46707	0.132684	4.16735	3.08163e-05	0.00042205		miR-376c-3p	449.345	0.381119	1.30235	0.157388	2.42153	0.0154552	0.0776398		hsa-miR-181c-5p	23376.1	0.328314	0.102755	3.19512	0.00139772	0.0152003																				hsa-miR-129-5p	46066.9	-0.690325	0.619714	0.194466	-3.54984
miR-383-5p	473.121	0.542078	1.45607	0.144241	3.75813	0.000171189	0.0017395		miR-543	177.127	0.378922	1.30037	0.153959	2.46118	0.0138481	0.0748112		hsa-miR-30a-5p	102408	0.313277	0.108579	2.88525	0.00391099	0.0351989																				hsa-miR-769-5p	12534	-0.678653	0.624748	0.233942	-2.90095
miR-30c-2-3p	196.907	0.525813	1.43974	0.115451	4.55443	5.25271e-06	0.000140017		miR-127-5p	380.209	0.365451	1.28828	0.136137	2.68443	0.00726546	0.0508582		hsa-miR-101-3p	92734.5	0.302722	0.103258	2.93171	0.00337099	0.0308712																				hsa-miR-625-3p	337.306	-0.674497	0.626551	0.26898	-2.50761
miR-28-5p	888.731	0.485239	1.39982	0.100696	4.81887	1.44374e-06	5.05308e-05		miR-218-5p	6027.35	0.35417	1.27825	0.122961	2.88036	0.00397224	0.0405902		hsa-miR-744-5p	3272.76	0.242073	0.079287	3.05312	0.00226475	0.0231804																				hsa-miR-485-5p	1569.57	-0.629995	0.646179	0.16937	-3.71964
miR-767-5p	116.414	0.484805	1.3994	0.157028	3.08738	0.00201929	0.0142938		miR-126-5p	48519.2	0.347149	1.27204	0.147245	2.35763	0.0183922	0.0892441		hsa-miR-328-3p	1341.14	-0.21173	0.0780498	-2.71276	0.0066725	0.0519858																				hsa-miR-504-5p	2181.25	-0.61771	0.651705	0.23108	-2.67314
miR-130a-3p	2107.32	0.476281	1.39115	0.157318	3.02751	0.00246576	0.0165259		miR-656-3p	365.308	0.314089	1.24323	0.124435	2.52411	0.0115992	0.0697588		hsa-miR-330-3p	1041.94	-0.267798	0.105244	-2.54455	0.010942	0.0729287																				hsa-miR-139-3p	1074.35	-0.617488	0.651805	0.190359	-3.2438
miR-660-5p	732.063	0.465446	1.38074	0.0914643	5.08882	3.60292e-07	1.41865e-05		miR-582-3p	562.551	0.30451	1.235	0.111905	2.72114	0.00650574	0.0495513		hsa-let-7a-5p	481067	-0.268506	0.105648	-2.54152	0.0110371	0.0729287																				hsa-miR-181b-5p	27657.2	-0.589116	0.66475	0.22648	-2.60119
miR-532-5p	764.131	0.45233	1.36825	0.117038	3.86481	0.000111176	0.00118713		miR-101-3p	92734.5	0.302776	1.23352	0.112062	2.70187	0.00689516	0.0498767		hsa-miR-151a-3p	18960.3	-0.268773	0.112784	-2.38309	0.0171681	0.094334																				hsa-miR-132-5p	2676.36	-0.565083	0.675917	0.249193	-2.26766
miR-27a-3p	4613.51	0.445609	1.36189	0.156681	2.84405	0.00445445	0.0257459		miR-335-5p	2635.4	0.258528	1.19626	0.0898053	2.87876	0.00399248	0.0405902		hsa-miR-192-5p	8152.27	-0.274118	0.0974545	-2.81278	0.00491158	0.0427307																				hsa-miR-381-3p	21375.8	-0.55988	0.678358	0.219065	-2.55577
miR-99a-3p	429.222	0.434642	1.35157	0.0839904	5.1749	2.28037e-07	9.57755e-06		miR-127-3p	74130.4	-0.270202	0.829204	0.0770333	-3.5076	0.000452173	0.0124839		hsa-miR-377-5p	171.894	-0.279476	0.11233	-2.488	0.0128464	0.0788921																				hsa-miR-146b-5p	7526.91	-0.552857	0.681669	0.172433	-3.20622
miR-381-3p	4744.75	0.404557	1.32368	0.168701	2.39807	0.0164819	0.0684374		miR-148b-3p	3309.77	-0.27371	0.82719	0.110585	-2.47511	0.0133194	0.0738623		hsa-miR-432-5p	892.639	-0.280389	0.115871	-2.41984	0.0155273	0.0872848																				hsa-miR-539-5p	263.082	-0.528201	0.693419	0.187121	-2.82278
miR-28-3p	4908.08	0.370238	1.29257	0.133501	2.77329	0.00554925	0.0301356		miR-24-3p	7874.83	-0.28175	0.822593	0.115095	-2.44797	0.0143666	0.0748112		hsa-miR-137	1320.66	-0.287611	0.117552	-2.44668	0.014418	0.0845637																				hsa-miR-129-2-3p	1007.38	-0.519712	0.697511	0.197735	-2.62833
miR-197-3p	2071.12	0.365031	1.28791	0.11902	3.06696	0.00216247	0.0151373		miR-328-3p	1341.14	-0.293538	0.815899	0.0806167	-3.64115	0.00027142	0.010536		hsa-miR-153-3p	14489.3	-0.289114	0.119926	-2.41077	0.0159187	0.0883998																				hsa-miR-146b-3p	182.837	-0.516652	0.698992	0.188213	-2.74504
miR-126-3p	12206	0.359514	1.28299	0.161928	2.22021	0.0264042	0.0984298		miR-98-5p	17413	-0.295221	0.814947	0.116479	-2.53456	0.011259	0.06868		hsa-miR-124-3p	106599	-0.312493	0.11393	-2.74284	0.00609107	0.0488768																				hsa-miR-5010-3p	183.559	-0.51453	0.700021	0.201016	-2.55965
miR-30a-5p	102408	0.350421	1.27493	0.115524	3.03332	0.00241876	0.0163851		miR-129-5p	5134.24	-0.29846	0.81312	0.127276	-2.34499	0.0190277	0.0449976		hsa-miR-3200-3p	464.052	-0.319937	0.122195	-2.61825	0.00883823	0.0640771																				hsa-miR-151b	10755	-0.499427	0.707388	0.184598	-2.70548
miR-423-5p	1746.98	0.338272	1.26424	0.142452	2.37464	0.0175658	0.0713966		miR-874-3p	3075	-0.310171	0.806546	0.0861448	-3.60058	0.000317511	0.0112981		hsa-miR-495-3p	442.659	-0.321313	0.0910923	-3.52734	0.000419755	0.00561826																				hsa-miR-190a-5p	238.021	-0.488162	0.712933	0.197062	-2.4772
miR-543	177.127	0.328544	1.25575	0.139489	2.35534	0.0185057	0.0742586		let-7c-5p	31342.8	-0.311717	0.805682	0.123965	-2.51455	0.0119185	0.0699944		hsa-miR-433-3p	652.163	-0.34204	0.11191	-3.05639	0.0022402	0.0231804																				hsa-miR-128-1-5p	172.521	-0.479833	0.717061	0.210294	-2.28173
miR-345-5p	1039	0.30429	1.23481	0.114757	2.65161	0.00801094	0.0407007		let-7g-5p	35040.8	-0.31454	0.804107	0.102601	-3.06565	0.00217198	0.0244062		hsa-miR-330-5p	1848.09	-0.342507	0.0953333	-3.59273	0.000327231	0.0053156																				hsa-miR-151a-5p	8799.48	-0.479695	0.717129	0.182271	-2.63176
miR-30e-5p	34912.2	0.301567	1.23248	0.094016	3.20761	0.00133843	0.0100382		miR-433-3p	652.163	-0.347451	0.785972	0.124658	-2.78723	0.00531605	0.0436529		hsa-miR-129-5p	5134.24	-0.344749	0.11422	-3.0183	0.00254201	0.0255179																				hsa-miR-654-5p	138.397	-0.478122	0.717911	0.144998	-3.29743
miR-326	328.492	0.29759	1.22909	0.120712	2.4653	0.01369	0.0594808		let-7b-5p	30622.2	-0.366478	0.775674	0.110001	-3.3316	0.000863485	0.0165322		hsa-miR-377-3p	217.77	-0.352013	0.127459	-2.76177	0.00574887	0.0484018																				hsa-miR-138-5p	3880.06	-0.474353	0.71979	0.139284	-3.40566
miR-497-5p	1577.44	0.287115	1.2202	0.112879	2.54355	0.0109731	0.0504603		miR-766-3p	140.411	-0.370203	0.773673	0.133636	-2.77025	0.00560138	0.0451281		hsa-miR-379-5p	439.918	-0.353989	0.125721	-2.81567	0.00486761	0.0427307																				hsa-miR-222-3p	7676.26	-0.459881	0.727046	0.200456	-2.29418
miR-323a-3p	912.56	0.257969	1.19579	0.0873763	2.95239	0.00315323	0.020066		miR-885-5p	529.112	-0.399714	0.758008	0.119026	-3.35821	0.00078448	0.0159511		hsa-miR-98-5p	17413	-0.364352	0.107881	-3.37736	0.000731862	0.0084896																				hsa-miR-127-5p	1308.56	-0.435484	0.739446	0.18478	-2.35677
miR-181c-5p	23376.1	0.245654	1.18563	0.0990547	2.47998	0.0131389	0.0587059		miR-382-5p	262.796	-0.400634	0.757525	0.116051	-3.45222	0.000555986	0.0131892		hsa-miR-190a-5p	963.732	-0.368548	0.106503	-3.46045	0.000539271	0.0067063																				hsa-miR-382-3p	849.932	-0.433591	0.740417	0.160096	-2.70832
miR-101-3p	92734.5	0.239402	1.1805	0.100367	2.38527	0.0170667	0.0698182		miR-191-5p	64028.5	-0.418939	0.747974	0.091655	-4.57083	4.858e-06	0.000414873		hsa-miR-130b-3p	313.343	-0.38125	0.15127	-2.52032	0.0117247	0.075559																				hsa-miR-27b-3p	51083.7	-0.43063	0.741938	0.16884	-2.55053
miR-149-5p	5496	0.233213	1.17545	0.0880508	2.64862	0.00808213	0.0407339		miR-34a-5p	1337.24	-0.427003	0.743805	0.150384	-2.83943	0.00451947	0.0413557		hsa-miR-335-3p	1035.55	-0.387663	0.154825	-2.50388	0.0122838	0.0775799																				hsa-miR-218-5p	41706.5	-0.427939	0.743323	0.17609	-2.43023
miR-382-5p	262.796	-0.265183	0.832093	0.0892483	-2.9713	0.00296546	0.0190637		miR-190a-5p	963.732	-0.446017	0.734067	0.159848	-2.79025	0.00526672	0.0436529		hsa-miR-766-3p	140.411	-0.389203	0.146509	-2.65652	0.00789521	0.059729																				hsa-miR-221-5p	928.57	-0.426194	0.744222	0.147535	-2.88877
let-7e-5p	13218	-0.282868	0.821956	0.0961281	-2.94261	0.00325454	0.0205036		let-7e-5p	13218	-0.472409	0.72076	0.135757	-3.47982	0.000501743	0.0126026		hsa-miR-582-5p	517.525	-0.397206	0.11479	-3.46029	0.000539588	0.0067063																				hsa-miR-134-5p	1764.51	-0.421606	0.746593	0.155475	-2.71173
let-7b-5p	30622.2	-0.283693	0.821485	0.0938262	-3.0236	0.00249786	0.0165647		miR-377-5p	171.894	-0.474842	0.719546	0.148203	-3.204	0.00135532	0.0199559		hsa-miR-148b-3p	3309.77	-0.401165	0.0887031	-4.52255	6.10981e-06	0.00022413																				hsa-miR-589-5p	381.715	-0.409992	0.752627	0.169291	-2.42182
miR-377-3p	217.77	-0.284259	0.821163	0.113073	-2.51394	0.011939	0.0537256		miR-151b	46085.1	-0.475664	0.719135	0.20671	-2.30112	0.021385	0.0981872		hsa-miR-361-5p	2323.66	-0.404947	0.0798131	-5.0737	3.90154e-07	1.69717e-05																				hsa-miR-127-3p	68278.8	-0.360875	0.778692	0.141236	-2.55511
miR-377-5p	171.894	-0.294151	0.815552	0.100976	-2.91309	0.00357873	0.0217581		miR-146b-5p	8392.07	-0.478382	0.717782	0.185692	-2.57622	0.00998879	0.0636599		hsa-miR-24-3p	7874.83	-0.41982	0.10492	-4.00133	6.29871e-05	0.00142953																				hsa-miR-382-5p	1676.5	-0.353996	0.782414	0.131436	-2.69329
miR-27b-3p	164750	-0.29443	0.815394	0.122901	-2.39566	0.0165904	0.0684374		miR-151a-5p	44136.5	-0.482237	0.715867	0.205411	-2.34767	0.0188912	0.0899976		hsa-miR-628-3p	313.661	-0.420541	0.140288	-2.99771	0.0027202	0.0267914																				hsa-miR-432-5p	1014.71	-0.331439	0.794743	0.1251	-2.64939
let-7b-3p	534.882	-0.297598	0.813606	0.0944103	-3.15218	0.00162055	0.011735		let-7d-5p	7036.3	-0.487927	0.713049	0.104542	-4.66726	3.05245e-06	0.00035607		hsa-miR-125a-5p	63635.9	-0.428645	0.144182	-2.97295	0.0029495	0.0279934																				hsa-miR-99b-3p	1619.88	-0.279638	0.823798	0.119189	-2.34618
let-7i-3p	107.211	-0.310044	0.806617	0.126935	-2.44254	0.0145843	0.0625043		miR-6511b-3p	150.914	-0.49248	0.710802	0.168073	-2.93015	0.003388	0.0361669		hsa-miR-127-3p	74130.4	-0.460361	0.0743338	-6.19315	5.89719e-10	6.15667e-08																				hsa-let-7d-5p	4662.55	0.229122	1.17212	0.0850801	2.69302
miR-328-3p	1341.14	-0.320843	0.800602	0.0749003	-4.2836	1.83896e-05	0.000313815		let-7a-5p	481067	-0.493059	0.710517	0.122187	-4.03528	5.45374e-05	0.00332678		hsa-miR-584-5p	1577.33	-0.466624	0.168895	-2.7628	0.00573076	0.0484018																				hsa-let-7b-5p	37441.4	0.274294	1.2094	0.107273	2.55696
miR-3200-3p	464.052	-0.321668	0.800144	0.113762	-2.82754	0.00469065	0.0268646		miR-27b-5p	128.502	-0.513927	0.700314	0.219438	-2.34202	0.0191798	0.0899976		hsa-miR-125b-5p	156977	-0.474483	0.138732	-3.42014	0.0006259	0.00742545																				hsa-let-7e-3p	160.678	0.302573	1.23334	0.10316	2.93306
miR-433-3p	652.163	-0.338473	0.790878	0.110958	-3.05046	0.00228493	0.0156468		miR-485-5p	549.28	-0.520085	0.697331	0.186479	-2.78897	0.00528759	0.0436529		hsa-miR-374a-5p	1001.8	-0.50594	0.120799	-4.18828	2.81076e-05	0.000774906																				hsa-miR-107	5355.64	0.372917	1.29497	0.144075	2.58836
miR-346	147.76	-0.343267	0.788254	0.133576	-2.56983	0.0101749	0.048197		miR-192-5p	8152.27	-0.557466	0.679494	0.101935	-5.46882	4.53045e-08	9.67251e-06		hsa-miR-1301-3p	439.222	-0.538149	0.156084	-3.44782	0.000565132	0.00686044																				hsa-miR-93-5p	1902.69	0.375329	1.29714	0.116284	3.22768
miR-582-5p	517.525	-0.343724	0.788005	0.105867	-3.24676	0.00116727	0.00907878		miR-3200-3p	464.052	-0.56067	0.677987	0.165847	-3.38064	0.000723173	0.0157076		hsa-miR-874-3p	3075	-0.599066	0.0824828	-7.26292	3.78816e-13	6.5914e-11																				hsa-miR-194-5p	1012.9	0.410374	1.32903	0.181313	2.26334
miR-664a-3p	218.961	-0.349837	0.784673	0.136638	-2.56031	0.0104578	0.0491674		miR-1301-3p	439.222	-0.564051	0.6764	0.177567	-3.17655	0.00149037	0.0201445		hsa-miR-212-3p	274.882	-0.627298	0.255961	-2.45076	0.0142555	0.0845611																				hsa-miR-27a-3p	4092.62	0.422862	1.34058	0.177138	2.38719
miR-495-3p	442.659	-0.360983	0.778634	0.0861796	-4.18873	2.80524e-05	0.000420786		miR-193a-5p	121.618	-0.583796	0.667206	0.225554	-2.58828	0.00964574	0.0629882		hsa-miR-151b	46085.1	-0.637963	0.121357	-5.25692	1.46489e-07	6.95155e-06																				hsa-miR-664a-3p	241.382	0.431497	1.34863	0.180248	2.39391
miR-873-3p	286.265	-0.367921	0.774899	0.141683	-2.59678	0.0094101	0.0459563		miR-1-3p	147.44	-0.584137	0.667048	0.240293	-2.43094	0.0150598	0.0765992		hsa-miR-301b-3p	248.009	-0.638158	0.162875	-3.91807	8.92603e-05	0.00176362																				hsa-miR-125a-5p	18873.9	0.43593	1.35278	0.17425	2.50175
miR-193b-3p	562.527	-0.368619	0.774524	0.142243	-2.59147	0.00955679	0.0462649		miR-668-3p	155.338	-0.591324	0.663733	0.178587	-3.31113	0.000929212	0.0165322		hsa-miR-151a-5p	44136.5	-0.646534	0.120984	-5.34398	9.09288e-08	4.74648e-06																				hsa-miR-363-3p	2903.13	0.44238	1.35884	0.153661	2.87894
miR-885-5p	529.112	-0.370712	0.773401	0.110856	-3.34408	0.000825571	0.00658367		miR-184	172.186	-0.612021	0.65428	0.245902	-2.48888	0.0128147	0.0719982		hsa-miR-191-5p	64028.5	-0.677938	0.0776724	-8.72817	2.58819e-18	1.35104e-15																				hsa-miR-708-5p	2000.46	0.484864	1.39945	0.16327	2.9697
miR-361-5p	2323.66	-0.374611	0.771313	0.0743401	-5.03915	4.67611e-07	1.73291e-05		miR-873-3p	286.265	-0.628082	0.647036	0.256298	-2.45059	0.0142623	0.0748112		hsa-miR-501-3p	1070.36	-0.691909	0.26847	-2.57723	0.00995962	0.0702549																				hsa-miR-365a-3p	1052.13	0.487997	1.4025	0.169649	2.87651
let-7a-5p	481067	-0.377994	0.769507	0.0990736	-3.81528	0.000136029	0.00140488		miR-129-1-3p	351.098	-0.665261	0.630575	0.186439	-3.56824	0.000359381	0.0118043		hsa-miR-99a-5p	17459.6	-0.696088	0.184209	-3.7788	0.000157585	0.00283654																				hsa-miR-365b-3p	1052.13	0.487997	1.4025	0.169649	2.87651
miR-410-3p	7952.03	-0.404916	0.75528	0.138713	-2.91909	0.00351049	0.0216825		miR-185-5p	323.37	-0.669328	0.6288	0.176578	-3.79055	0.000150313	0.00641834		hsa-miR-539-5p	121.969	-0.700687	0.167982	-4.17119	3.03008e-05	0.000774906																				hsa-miR-28-5p	622.44	0.489912	1.40436	0.14693	3.33433
miR-24-3p	7874.83	-0.414013	0.750533	0.103086	-4.01618	5.91487e-05	0.00073066		miR-375	184.352	-0.688431	0.620529	0.28322	-2.43072	0.0150687	0.0765992		hsa-miR-342-3p	3974.31	-0.732269	0.11464	-6.38756	1.68556e-10	2.19965e-08																				hsa-miR-30c-5p	40246.3	0.538061	1.45202	0.111929	4.80717
miR-668-3p	155.338	-0.414425	0.750319	0.138288	-2.99683	0.00272805	0.0177183		miR-146b-3p	123.9	-0.734956	0.600836	0.208801	-3.51988	0.000431738	0.0124839		hsa-miR-338-3p	45846.3	-0.770225	0.222326	-3.4644	0.000531415	0.0067063																				hsa-miR-16-5p	8156.86	0.553753	1.4679	0.201653	2.74608
miR-889-3p	1842.52	-0.416153	0.74942	0.152341	-2.73172	0.00630042	0.0330772		miR-132-5p	476.115	-0.763186	0.589194	0.30551	-2.49807	0.0124872	0.0719982		hsa-miR-100-5p	114469	-0.832453	0.232153	-3.5858	0.000336044	0.0053156																				hsa-miR-490-3p	277.333	0.56954	1.48405	0.192972	2.95141
miR-153-3p	14489.3	-0.422352	0.746207	0.113936	-3.70693	0.000209788	0.0020651		miR-132-3p	2400.55	-0.769637	0.586565	0.283771	-2.71217	0.00668442	0.0495513		hsa-miR-99b-5p	96106.3	-0.900841	0.204479	-4.40554	1.0552e-05	0.000344258																				hsa-miR-20a-5p	2783.27	0.591021	1.50631	0.160882	3.67363
miR-190a-5p	963.732	-0.425894	0.744377	0.0975839	-4.36439	1.27478e-05	0.000256302		miR-486-5p	46823.8	-0.818005	0.567226	0.289504	-2.82554	0.00472006	0.0419889		hsa-miR-577	2921.92	-0.955488	0.228699	-4.17792	2.94182e-05	0.000774906																				hsa-miR-99a-3p	302.971	0.59377	1.50919	0.23007	2.58083
miR-192-5p	8152.27	-0.426686	0.743969	0.0945011	-4.51514	6.32747e-06	0.00015332		miR-584-5p	1577.33	-0.880655	0.543121	0.372312	-2.36537	0.018012	0.0885909		hsa-miR-221-5p	692.195	-0.973573	0.160148	-6.07921	1.20776e-09	9.00644e-08																				hsa-miR-17-5p	1463.72	0.597553	1.51315	0.170375	3.50728
miR-124-3p	106599	-0.42856	0.743003	0.109974	-3.89693	9.74179e-05	0.00107672		miR-539-5p	121.969	-0.939265	0.521498	0.218999	-4.2889	1.7956e-05	0.00127787		hsa-miR-409-5p	799.769	-1.23942	0.340083	-3.64448	0.000267937	0.00451171																				hsa-miR-362-5p	167.75	0.617591	1.53431	0.215741	2.86265
miR-204-5p	12333.5	-0.433667	0.740377	0.14846	-2.92111	0.00348787	0.0216825		miR-577	2921.92	-0.951238	0.517188	0.309194	-3.07651	0.0020944	0.0244062		hsa-miR-1271-5p	482.74	-1.26328	0.321639	-3.92765	8.57812e-05	0.00176362																				hsa-miR-186-5p	3073	0.620318	1.53721	0.141246	4.39176
miR-98-5p	17413	-0.43452	0.73994	0.101059	-4.29965	1.71068e-05	0.000307922		miR-212-3p	274.882	-1.00384	0.49867	0.341334	-2.94094	0.00327221	0.0358265		hsa-miR-212-5p	218.175	-1.31001	0.304004	-4.3092	1.63849e-05	0.000503114																				hsa-miR-23a-3p	2849.47	0.639353	1.55763	0.231444	2.76246
miR-151a-3p	18960.3	-0.434902	0.739744	0.128095	-3.39515	0.000685918	0.00561994		miR-212-5p	218.175	-1.44411	0.367518	0.365927	-3.94646	7.93166e-05	0.00423352																												hsa-miR-155-5p	374.024	0.66205	1.58233	0.204143	3.24306
miR-330-5p	1848.09	-0.45853	0.727728	0.0966912	-4.74221	2.11403e-06	6.9452e-05																																					hsa-miR-502-3p	159.253	0.678149	1.60009	0.185379	3.65817
miR-766-3p	140.411	-0.466987	0.723474	0.140166	-3.33167	0.000863277	0.0067983																																					hsa-miR-126-5p	1167.23	0.695382	1.61931	0.188575	3.68757
miR-330-3p	1041.94	-0.478031	0.717957	0.11457	-4.17238	3.01435e-05	0.00042205																																					hsa-miR-24-2-5p	103.602	0.6965	1.62057	0.197376	3.5288
miR-301b-3p	248.009	-0.484728	0.714632	0.149994	-3.23164	0.00123081	0.00945623																																					hsa-miR-92b-3p	8215.85	0.708468	1.63407	0.227879	3.10897
miR-129-5p	5134.24	-0.486397	0.713806	0.112457	-4.32516	1.52419e-05	0.000284945																																					hsa-miR-339-5p	405.278	0.716123	1.64276	0.230193	3.11096
miR-132-3p	2400.55	-0.508162	0.703117	0.217284	-2.3387	0.0193508	0.0771584																																					hsa-miR-660-5p	363.467	0.732185	1.66115	0.196722	3.72193
miR-379-5p	439.918	-0.511686	0.701402	0.125468	-4.07821	4.53834e-05	0.000591062																																					hsa-miR-455-3p	124.76	0.760657	1.69426	0.234985	3.23704
miR-34a-5p	1337.24	-0.513824	0.700364	0.130745	-3.92996	8.49592e-05	0.000955791																																					hsa-miR-195-5p	2278.19	0.766395	1.70101	0.211707	3.62007
miR-628-3p	313.661	-0.514788	0.699896	0.132572	-3.88309	0.000103138	0.00112029																																					hsa-miR-133a-3p	657.878	0.792074	1.73156	0.186806	4.24008
miR-185-5p	323.37	-0.529626	0.692734	0.15272	-3.46795	0.000524448	0.00465355																																					hsa-miR-374a-5p	2744.06	0.807016	1.74959	0.235032	3.43364
miR-127-3p	74130.4	-0.54164	0.686989	0.0714227	-7.58359	3.36113e-14	5.29378e-12																																					hsa-miR-193a-5p	104.806	0.807148	1.74975	0.206049	3.91726
miR-125a-5p	63635.9	-0.546113	0.684863	0.134676	-4.05501	5.01328e-05	0.000631673																																					hsa-miR-15b-5p	315.641	0.846554	1.7982	0.320887	2.63817
miR-374a-5p	1001.8	-0.552603	0.681789	0.118141	-4.6775	2.90397e-06	8.71192e-05																																					hsa-miR-143-5p	262.078	0.854745	1.80844	0.321371	2.65969
miR-148b-3p	3309.77	-0.568857	0.674151	0.084451	-6.73594	1.62876e-11	1.14013e-09																																					hsa-miR-150-5p	438.586	0.866043	1.82266	0.185956	4.65726
miR-1185-5p	642.441	-0.57405	0.671729	0.121269	-4.73368	2.20482e-06	6.9452e-05																																					hsa-miR-204-5p	1636.19	0.898106	1.86362	0.228475	3.93087
miR-125b-5p	156977	-0.581039	0.668482	0.129788	-4.47684	7.57576e-06	0.000170455																																					hsa-miR-223-3p	309.051	0.900191	1.86631	0.295345	3.04793
miR-539-5p	121.969	-0.617055	0.652001	0.155366	-3.97163	7.13819e-05	0.000848502																																					hsa-miR-374b-5p	4781.59	0.915082	1.88568	0.225655	4.05522
miR-1301-3p	439.222	-0.635408	0.643759	0.145182	-4.37662	1.20532e-05	0.000253118																																					hsa-miR-497-5p	723.832	0.951021	1.93324	0.224021	4.24522
miR-129-1-3p	351.098	-0.637355	0.642891	0.170907	-3.72925	0.000192054	0.00192054																																					hsa-miR-16-2-3p	103.499	1.03163	2.04434	0.393265	2.62325
miR-874-3p	3075	-0.652656	0.636108	0.0774852	-8.42297	3.67049e-17	1.1562e-14																																					hsa-miR-145-3p	581.202	1.07512	2.1069	0.248624	4.32431
miR-338-3p	45846.3	-0.654591	0.635256	0.256566	-2.55135	0.0107306	0.0497078																																					hsa-miR-145-5p	2051.6	1.08359	2.1193	0.271763	3.98726
miR-488-5p	109.087	-0.680913	0.62377	0.247823	-2.74758	0.00600378	0.0320541																																					hsa-miR-3065-5p	102.253	1.1022	2.14681	0.360506	3.05736
miR-151b	46085.1	-0.723953	0.605436	0.129726	-5.58065	2.39624e-08	1.25803e-06																																					hsa-miR-106a-5p	269.773	1.11313	2.16314	0.241649	4.60638
miR-151a-5p	44136.5	-0.732565	0.601833	0.129121	-5.67348	1.39922e-08	8.81511e-07																																					hsa-miR-20b-5p	321.319	1.16795	2.24693	0.252292	4.62937
miR-501-3p	1070.36	-0.735289	0.600698	0.257149	-2.85939	0.00424463	0.0250393																																					hsa-miR-142-5p	436.25	1.24702	2.3735	0.354046	3.52218
miR-191-5p	64028.5	-0.745268	0.596557	0.0731059	-10.1944	2.10132e-24	1.32383e-21																																					hsa-miR-451a	25022.1	1.4638	2.75833	0.557314	2.62652
miR-342-3p	3974.31	-0.762131	0.589625	0.106034	-7.18759	6.59459e-13	5.93513e-11																																					hsa-miR-199a-5p	1148.91	1.6507	3.13985	0.374133	4.41206
miR-584-5p	1577.33	-0.804229	0.572668	0.218057	-3.68816	0.000225886	0.00218935																																					hsa-miR-199a-3p	4650.1	1.68717	3.22025	0.363737	4.63845
miR-99a-5p	17459.6	-0.814251	0.568704	0.176676	-4.60871	4.05169e-06	0.000116026																																					hsa-miR-199b-3p	4650.1	1.68717	3.22025	0.363737	4.63845
miR-221-5p	692.195	-0.818681	0.56696	0.150701	-5.4325	5.5571e-08	2.50069e-06																																					hsa-miR-144-5p	259.601	1.68786	3.22179	0.508833	3.31713
miR-338-5p	3369.98	-0.819609	0.566596	0.295832	-2.77052	0.00559661	0.0301356
miR-100-5p	114469	-1.015	0.494829	0.223656	-4.53821	5.67327e-06	0.000142966
miR-212-5p	218.175	-1.07352	0.475157	0.279574	-3.83985	0.000123109	0.00129264
miR-99b-5p	96106.3	-1.08919	0.470027	0.19408	-5.61206	1.99937e-08	1.14509e-06
miR-577	2921.92	-1.1783	0.441872	0.262798	-4.48367	7.33688e-06	0.000170455
miR-409-5p	799.769	-1.38677	0.382421	0.323776	-4.2831	1.84304e-05	0.000313815
miR-1271-5p	482.74	-1.65444	0.317661	0.30402	-5.44188	5.27215e-08	2.50069e-06
[truncated: 2 more columns]

## Sheet: Supplemental table 3
Frontal region common microRNAs							Temporal region common microRNAs
microRNAs	C9ORF (log2FC)	GRN (log2FC)	MAPT (log2FC)				microRNAs	C9ORF (log2FC)	GRN (log2FC)	MAPT (log2FC)
hsa-miR-150-5p	0.905315	0.828247	0.75256				hsa-miR-132-3p	-0.813279	-0.685004	-0.725071
hsa-miR-19a-3p	0.72583	0.452275	0.709806				hsa-miR-129-1-3p	-0.964608	-0.965957	-0.833127
hsa-miR-19b-3p	0.622475	0.453331	0.593319				hsa-miR-146b-5p	-0.683794	-0.626771	-0.552857
hsa-miR-376a-5p	0.55294	0.381134	0.610649				hsa-miR-129-5p	-0.593185	-0.578308	-0.690325
hsa-miR-383-5p	0.542078	0.488262	0.402229				hsa-miR-212-5p	-0.759966	-0.887082	-0.896194
hsa-miR-660-5p	0.465446	0.472549	0.365276
hsa-miR-99a-3p	0.434642	0.387292	0.442946
hsa-miR-101-3p	0.239402	0.302776	0.302722
hsa-miR-377-5p	-0.294151	-0.474842	-0.279476
hsa-miR-328-3p	-0.320843	-0.293538	-0.21173
hsa-miR-3200-3p	-0.321668	-0.56067	-0.319937
hsa-miR-433-3p	-0.338473	-0.347451	-0.34204
hsa-let-7a-5p	-0.377994	-0.493059	-0.268506
hsa-miR-24-3p	-0.414013	-0.28175	-0.41982
hsa-miR-190a-5p	-0.425894	-0.446017	-0.368548
hsa-miR-192-5p	-0.426686	-0.557466	-0.274118
hsa-miR-98-5p	-0.43452	-0.295221	-0.364352
hsa-miR-766-3p	-0.466987	-0.370203	-0.389203
hsa-miR-129-5p	-0.486397	-0.29846	-0.344749
hsa-miR-127-3p	-0.54164	-0.270202	-0.460361
hsa-miR-148b-3p	-0.568857	-0.27371	-0.401165
hsa-miR-539-5p	-0.617055	-0.939265	-0.700687
hsa-miR-1301-3p	-0.635408	-0.564051	-0.538149
hsa-miR-874-3p	-0.652656	-0.310171	-0.599066
hsa-miR-151b	-0.723953	-0.475664	-0.637963
hsa-miR-151a-5p	-0.732565	-0.482237	-0.646534
hsa-miR-191-5p	-0.745268	-0.418939	-0.677938
hsa-miR-584-5p	-0.804229	-0.880655	-0.466624
hsa-miR-212-5p	-1.07352	-1.44411	-1.31001
hsa-miR-577	-1.1783	-0.951238	-0.955488

## Sheet: Supplemental table 4
Deregulated microRNA target genes (frontal and temporal brain regions)
Target genes of deregulated microRNA in frontal region		Target genes of deregulated microRNA in temporal region
PSAP		MALAT1
HSP90AA1		VIM
ATP5B		HMGB1
UBC		SLC2A1
APP		MAPK1
LDHB		HNRNPD
ATP1B1		ABCC5
BASP1		APC
RHOB		CRK
RAC1		RAF1
PKM		YY1AP1
RHOA		MCRS1
DPYSL2		IRAK1
PGRMC1		CAMTA1
STMN1		TJP1
HNRNPDL		NOVA1
ST13		MYO6
RNASE1		CCDC6
NEFM		PIK3R3
PRDX6		GSK3B
ABCA2		RASA1
H3F3A		FNDC3A
NDFIP1		FMR1
VIM		PDPK1
TF		CDKN1A
DUSP1		BMPR2
ARHGDIA		SPRED1
CTNNB1		TJAP1
KAT2A		UBE2F
HMGB1		ARHGAP32
LDHA		TLN2
CDKN1B		SP1
MAP4K4		GALNT1
CTDSP2		KIT
GRB2		BECN1
ZBTB4		SIRT1
HRAS		RB1
CDK9		ABCB1
MCL1		HBEGF
FGFR3		NR4A2
SRSF11		FGF2
PAK1		MAF
SKI		PDCD2
SLC2A1		ZNRF3
RAB14		PDGFRA
FSCN1		NOTCH1
KHSRP		ERBB4
MXI1		FOXO1
PRDX3		ABCG1
MT1M		TLR4
STX16		NFKB1
TNK2		CCNB1
WNK1		SOX4
EWSR1		TRAF6
LRRC8A		EGFR
PIN1		ZNF117
CDC34		SPRY1
SGSM3		SMAD2
FOS		RARB
MAPK1		AGO3
SMARCB1		MMP16
HMGA1		CCNA2
CD47		IRAK4
BCL6		ETV6
EIF2S3		CDK6
AZIN1		S100A12
TUSC2		RET
RAB5A		SOX5
ZFP36L1		BDNF
MSMO1		AGO2
PRPS1		KLHL11
ARRB2		IL1RAP
RAP2A		SOX6
KLF13		COL1A1
PARP1		AURKA
STAT5B		SLC5A5
MEF2D		UHRF1
ADIPOR2		CDH1
SERP1		WNT4
NCAN		IL1RL2
ITGB1		IGF1
TOP1		BDKRB2
INSIG1		IL6
KAT2B		TWIST1
PCNA		PAX8
ABCC5		MMP9
APC		GDF5
H2AFX		IGF2BP3
HIF1A
SOX9
SRCIN1
AMFR
RAB40C
MAPK4
BACE1
MLEC
SNHG1
MCRS1
MAP3K5
SH3PXD2A
SNX6
MTUS1
FURIN
PRKCA
NCSTN
BMI1
GRSF1
ALCAM
NDST1
NLK
HIPK1
CTNND1
CAMTA1
CNDP2
TMED7
ITGAV
FOPNL
TJP1
SRF
ARIH2
FBXW7
PPP1R10
SNX19
ERCC3
ACADM
PTPRF
STAT1
ZEB2
CBX5
STAT3
NF2
DEDD
IMPDH1
PTEN
SLC20A1
TFCP2
PIK3R3
EGR1
KCNH2
ACVR1B
EP300
CORO1A
MECP2
PRPF38A
CCND2
RAB13
ZNF513
SMARCA5
ZEB1
VPS4B
BCAR1
PHLPP1
MEN1
BAG5
ARID1A
XBP1
FNDC3A
SLC16A1
PRMT5
ZMPSTE24
FMR1
GADD45A
MARK2
PDIA6
PMEPA1
ATG4D
CNST
MLH1
PDPK1
BMPR2
HIPK3
MBD6
CDKN1A
PDGFRB
TOM1
COPS5
VHL
ABCG2
CASP3
NOB1
HDAC1
AKT1
P2RX7
FAF1
MAPK14
CEBPB
DHFR
KMT5A
MTOR
SSSCA1
UBE2F
PIK3CB
KLF6
WWP1
NRAS
FEN1
LMNB2
MAP3K9
SFRP1
SP1
TRIM11
KRAS
DNMT1
GALNT1
KIT
XIAP
SLC16A2
RAVER2
AGO4
DICER1
SATB1
CD34
TTC9C
CCND1
TGFBR2
PRKAA1
EGR3
N4BP1
MDM4
ZNF317
ALOX5
BECN1
RPS6KA3
MYLIP
PIM1
RB1
S100A8
MED28
BAX
CD22
CUL5
IGF1R
AGO1
ABCB1
FRY
CDK8
ATXN1
UHRF2
CAST
SOCS3
CCKBR
NR4A2
MIS12
SIVA1
SERPINB9
MAF
CDC7
SMAD4
ARID4B
USP34
CDK4
PPP2R5E
PRKAB1
ITGA3
CNOT4
CSF1
ACVR1
RGMA
KCNQ5
SUZ12
CBL
CASP9
DNMT3A
MCM4
CPEB1
NPEPL1
PBX3
NOTCH1
TGFB1
MXD1
CREB1
EDN1
GRK4
AGPAT2
E2F6

## Sheet: Supplemental table 5
Biological processes enriched for microRNAs deregulated in Frontal region											Biological processes enriched for microRNAs deregulated in Temporal region
GOID	GOTerm	Ontology Source	Term PValue	Term PValue Corrected with Benjamini-Hochberg	GOLevels	GOGroups	% Associated Genes	GOLevels	Remarks		GOID	GOTerm	Ontology Source	Term PValue	Term PValue Corrected with Benjamini-Hochberg	GOLevels	GOGroups	% Associated Genes	Remarks
GO:0012501	programmed cell death	GO_BiologicalProcess-EBI-UniProt-GOA_27.02.2019_00h00	2.9188e-39	1.55572e-36	[3]	Group488	4.95202	[3]	Key biological processes		GO:0048708	astrocyte differentiation	GO_BiologicalProcess-EBI-UniProt-GOA_27.02.2019_00h00	2.53959e-08	9.49585e-08	[5, 6, 7, 8, 9]	Group12	7.27273	Key biological processes
GO:0006915	apoptotic process	GO_BiologicalProcess-EBI-UniProt-GOA_27.02.2019_00h00	5.47787e-39	2.18978e-36	[4]	Group230	5.08544	[4]			GO:0016572	histone phosphorylation	GO_BiologicalProcess-EBI-UniProt-GOA_27.02.2019_00h00	1.50744e-07	4.68577e-07	[6, 7, 8]	Group04	10.7143
GO:0060548	negative regulation of cell death	GO_BiologicalProcess-EBI-UniProt-GOA_27.02.2019_00h00	1.60684e-27	8.85979e-26	[3, 4, 5]	Group548	6.00462	[3			GO:0032755	positive regulation of interleukin-6 production	GO_BiologicalProcess-EBI-UniProt-GOA_27.02.2019_00h00	8.43355e-07	1.9962e-06	[4, 5, 6]	Group34	5.88235
GO:0022008	neurogenesis	GO_BiologicalProcess-EBI-UniProt-GOA_27.02.2019_00h00	1.27821e-23	3.78493e-22	[4, 5, 6]	Group363	4.55684	[4			GO:0014068	positive regulation of phosphatidylinositol 3-kinase signaling	GO_BiologicalProcess-EBI-UniProt-GOA_27.02.2019_00h00	9.97966e-07	2.3196e-06	[5, 6, 7, 8, 9, 10]	Group42	5.7377
GO:0002520	immune system development	GO_BiologicalProcess-EBI-UniProt-GOA_27.02.2019_00h00	3.30339e-23	9.1071e-22	[2, 4, 5]	Group683	5.61265	[2			GO:1901224	positive regulation of NIK/NF-kappaB signaling	GO_BiologicalProcess-EBI-UniProt-GOA_27.02.2019_00h00	6.66415e-06	1.2194e-05	[5, 6, 7, 8]	Group38	5.66038
GO:0010648	negative regulation of cell communication	GO_BiologicalProcess-EBI-UniProt-GOA_27.02.2019_00h00	8.10346e-20	1.19976e-18	[3, 4, 5]	Group676	4.57245	[3			GO:0090344	negative regulation of cell aging	GO_BiologicalProcess-EBI-UniProt-GOA_27.02.2019_00h00	2.16023e-05	3.50527e-05	[3, 4, 5]	Group17	10.5263
GO:0030182	neuron differentiation	GO_BiologicalProcess-EBI-UniProt-GOA_27.02.2019_00h00	1.23142e-19	1.74251e-18	[4, 6, 7, 8]	Group685	4.54009	[4			GO:0033127	regulation of histone phosphorylation	GO_BiologicalProcess-EBI-UniProt-GOA_27.02.2019_00h00	3.43274e-05	5.33523e-05	[6, 7, 8, 9]	Group04	20
GO:0045786	negative regulation of cell cycle	GO_BiologicalProcess-EBI-UniProt-GOA_27.02.2019_00h00	3.16741e-19	4.22058e-18	[3, 4, 5]	Group211	6.22797	[3			GO:0042089	cytokine biosynthetic process	GO_BiologicalProcess-EBI-UniProt-GOA_27.02.2019_00h00	3.53018e-05	5.4538e-05	[3, 5, 6]	Group38	4.22535
GO:0070997	neuron death	GO_BiologicalProcess-EBI-UniProt-GOA_27.02.2019_00h00	4.06203e-17	3.79836e-16	[3]	Group499	8.04348	[3]			GO:0021782	glial cell development	GO_BiologicalProcess-EBI-UniProt-GOA_27.02.2019_00h00	4.79903e-05	7.03494e-05	[4, 5, 7, 8, 9]	Group12	4
GO:0097190	apoptotic signaling pathway	GO_BiologicalProcess-EBI-UniProt-GOA_27.02.2019_00h00	2.80433e-14	1.75161e-13	[3, 4, 5]	Group199	5.56258	[3			GO:0032655	regulation of interleukin-12 production	GO_BiologicalProcess-EBI-UniProt-GOA_27.02.2019_00h00	0.000203878	0.000257846	[4, 5]	Group38	5.97015
GO:0016569	covalent chromatin modification	GO_BiologicalProcess-EBI-UniProt-GOA_27.02.2019_00h00	4.12839e-13	2.34089e-12	[4, 5, 6]	Group446	5.99676	[4			GO:0035173	histone kinase activity	GO_BiologicalProcess-EBI-UniProt-GOA_27.02.2019_00h00	0.000322563	0.000394414	[7, 8, 9]	Group33	9.67742
GO:0051493	regulation of cytoskeleton organization	GO_BiologicalProcess-EBI-UniProt-GOA_27.02.2019_00h00	1.67658e-12	8.76093e-12	[5, 6]	Group301	5.58824	[5			GO:0150076	neuroinflammatory response	GO_BiologicalProcess-EBI-UniProt-GOA_27.02.2019_00h00	0.000485349	0.000571781	[5]	Group23	4.7619
GO:0031589	cell-substrate adhesion	GO_BiologicalProcess-EBI-UniProt-GOA_27.02.2019_00h00	9.56238e-11	4.05577e-10	[3]	Group603	6.34921	[3]			GO:0097192	extrinsic apoptotic signaling pathway in absence of ligand	GO_BiologicalProcess-EBI-UniProt-GOA_27.02.2019_00h00	0.000604173	0.00068972	[4, 5, 6, 7]	Group16	4.49438
GO:0016055	Wnt signaling pathway	GO_BiologicalProcess-EBI-UniProt-GOA_27.02.2019_00h00	1.72128e-10	7.13038e-10	[4, 5, 6, 7]	Group522	5.34846	[4			GO:0030512	negative regulation of transforming growth factor beta receptor signaling pathway	GO_BiologicalProcess-EBI-UniProt-GOA_27.02.2019_00h00	0.000657019	0.000743469	[5, 6, 7, 8, 9, 10]	Group08	4.3956
GO:0034330	cell junction organization	GO_BiologicalProcess-EBI-UniProt-GOA_27.02.2019_00h00	8.32325e-10	3.11683e-09	[3]	Group569	6.41026	[3]			GO:0032733	positive regulation of interleukin-10 production	GO_BiologicalProcess-EBI-UniProt-GOA_27.02.2019_00h00	0.000912602	0.00100192	[4, 5, 6]	Group07	6.81818
GO:0048812	neuron projection morphogenesis	GO_BiologicalProcess-EBI-UniProt-GOA_27.02.2019_00h00	2.29814e-09	7.95397e-09	[6, 7, 8, 9, 10, 11]	Group285	4.43645	[6			GO:2000778	positive regulation of interleukin-6 secretion	GO_BiologicalProcess-EBI-UniProt-GOA_27.02.2019_00h00	0.000974744	0.00106111	[5, 6, 7, 8, 9, 10, 11, 12]	Group34	6.66667
GO:0038127	ERBB signaling pathway	GO_BiologicalProcess-EBI-UniProt-GOA_27.02.2019_00h00	5.46642e-09	1.78021e-08	[6, 7, 8]	Group291	8.67347	[6			GO:1904646	cellular response to amyloid-beta	GO_BiologicalProcess-EBI-UniProt-GOA_27.02.2019_00h00	0.00193622	0.00202245	[6, 7]	Group16	5.26316
GO:0017015	regulation of transforming growth factor beta receptor signaling pathway	GO_BiologicalProcess-EBI-UniProt-GOA_27.02.2019_00h00	5.81142e-09	1.88488e-08	[5, 6, 7, 8, 9]	Group687	10.0671	[5			GO:0032720	negative regulation of tumor necrosis factor production	GO_BiologicalProcess-EBI-UniProt-GOA_27.02.2019_00h00	0.00391616	0.0039314	[5, 6, 7]	Group16	4.10959
GO:0002683	negative regulation of immune system process	GO_BiologicalProcess-EBI-UniProt-GOA_27.02.2019_00h00	6.08452e-09	1.96548e-08	[2, 3, 4]	Group355	4.99168	[2			GO:0035270	endocrine system development	GO_BiologicalProcess-EBI-UniProt-GOA_27.02.2019_00h00	5.72624e-13	7.77563e-12	[4, 5]	Group22	7.47126	Biological processes related to metabolism cell signalling etc
GO:0007569	cell aging	GO_BiologicalProcess-EBI-UniProt-GOA_27.02.2019_00h00	6.98275e-09	2.23308e-08	[3]	Group429	9.93377	[3]			GO:0060485	mesenchyme development	GO_BiologicalProcess-EBI-UniProt-GOA_27.02.2019_00h00	2.68442e-11	2.4735e-10	[4, 5, 6]	Group56	4.2735
GO:0007611	learning or memory	GO_BiologicalProcess-EBI-UniProt-GOA_27.02.2019_00h00	9.80329e-09	3.08572e-08	[2, 5]	Group121	6.37681	[2			GO:0043406	positive regulation of MAP kinase activity	GO_BiologicalProcess-EBI-UniProt-GOA_27.02.2019_00h00	6.07954e-11	5.22841e-10	[6, 7, 8, 9, 10, 11, 12]	Group40	4.03226
GO:0001817	regulation of cytokine production	GO_BiologicalProcess-EBI-UniProt-GOA_27.02.2019_00h00	2.43602e-08	7.19998e-08	[3, 4]	Group050	4.05702	[3			GO:0048565	digestive tract development	GO_BiologicalProcess-EBI-UniProt-GOA_27.02.2019_00h00	1.51884e-10	1.22456e-09	[4, 5, 6]	Group24	6.58683
GO:0034599	cellular response to oxidative stress	GO_BiologicalProcess-EBI-UniProt-GOA_27.02.2019_00h00	3.54236e-08	1.0043e-07	[4]	Group642	5.7072	[4]			GO:0048762	mesenchymal cell differentiation	GO_BiologicalProcess-EBI-UniProt-GOA_27.02.2019_00h00	1.6832e-10	1.27725e-09	[4, 5, 6, 7]	Group56	4.7619
GO:0014013	regulation of gliogenesis	GO_BiologicalProcess-EBI-UniProt-GOA_27.02.2019_00h00	3.83282e-08	1.08281e-07	[6, 7, 8, 9]	Group394	9.52381	[6			GO:0000302	response to reactive oxygen species	GO_BiologicalProcess-EBI-UniProt-GOA_27.02.2019_00h00	6.30841e-10	4.17325e-09	[4]	Group05	4.27632
GO:0060627	regulation of vesicle-mediated transport	GO_BiologicalProcess-EBI-UniProt-GOA_27.02.2019_00h00	3.9295e-08	1.10621e-07	[3, 4, 5]	Group118	4.59418	[3			GO:0055023	positive regulation of cardiac muscle tissue growth	GO_BiologicalProcess-EBI-UniProt-GOA_27.02.2019_00h00	1.21703e-09	7.30221e-09	[4, 5, 6, 7, 8, 9, 10, 11]	Group53	14.8936
GO:0034333	adherens junction assembly	GO_BiologicalProcess-EBI-UniProt-GOA_27.02.2019_00h00	5.00395e-08	1.38192e-07	[5]	Group572	10.2362	[5]			GO:0035051	cardiocyte differentiation	GO_BiologicalProcess-EBI-UniProt-GOA_27.02.2019_00h00	1.92633e-09	1.0354e-08	[4, 5, 6, 7]	Group24	5.18868
GO:0070507	regulation of microtubule cytoskeleton organization	GO_BiologicalProcess-EBI-UniProt-GOA_27.02.2019_00h00	5.14168e-08	1.41751e-07	[4, 5, 6, 7]	Group263	7.03125	[4			GO:0048660	regulation of smooth muscle cell proliferation	GO_BiologicalProcess-EBI-UniProt-GOA_27.02.2019_00h00	4.1069e-09	2.11916e-08	[3, 4, 5]	Group06	5.74713
GO:0002444	myeloid leukocyte mediated immunity	GO_BiologicalProcess-EBI-UniProt-GOA_27.02.2019_00h00	5.66433e-08	1.55356e-07	[4]	Group309	4.31849	[4]			GO:0014066	regulation of phosphatidylinositol 3-kinase signaling	GO_BiologicalProcess-EBI-UniProt-GOA_27.02.2019_00h00	5.11401e-09	2.53733e-08	[5, 6, 7, 8, 9]	Group05	5.61798
GO:0030036	actin cytoskeleton organization	GO_BiologicalProcess-EBI-UniProt-GOA_27.02.2019_00h00	1.0885e-07	2.83935e-07	[3, 5]	Group046	4.03321	[3			GO:0042770	signal transduction in response to DNA damage	GO_BiologicalProcess-EBI-UniProt-GOA_27.02.2019_00h00	9.57286e-09	4.25827e-08	[4, 5, 6]	Group17	5.26316
GO:0016572	histone phosphorylation	GO_BiologicalProcess-EBI-UniProt-GOA_27.02.2019_00h00	1.19221e-07	3.09472e-07	[6, 7, 8]	Group133	16.0714	[6			GO:0002065	columnar/cuboidal epithelial cell differentiation	GO_BiologicalProcess-EBI-UniProt-GOA_27.02.2019_00h00	1.47818e-08	6.05351e-08	[5, 6]	Group68	6.12245
GO:0051495	positive regulation of cytoskeleton organization	GO_BiologicalProcess-EBI-UniProt-GOA_27.02.2019_00h00	1.40194e-07	3.60403e-07	[5, 6, 7]	Group370	6.25	[5			GO:0043534	blood vessel endothelial cell migration	GO_BiologicalProcess-EBI-UniProt-GOA_27.02.2019_00h00	2.21784e-08	8.66973e-08	[6, 7, 8]	Group72	5.84416
GO:0034332	adherens junction organization	GO_BiologicalProcess-EBI-UniProt-GOA_27.02.2019_00h00	1.63331e-07	4.17198e-07	[4]	Group505	7.8534	[4]			GO:0048146	positive regulation of fibroblast proliferation	GO_BiologicalProcess-EBI-UniProt-GOA_27.02.2019_00h00	2.36686e-08	8.98016e-08	[3, 4, 5, 6]	Group57	9.85915
GO:0010810	regulation of cell-substrate adhesion	GO_BiologicalProcess-EBI-UniProt-GOA_27.02.2019_00h00	1.78173e-07	4.5222e-07	[3, 4]	Group327	6.47482	[3			GO:0010518	positive regulation of phospholipase activity	GO_BiologicalProcess-EBI-UniProt-GOA_27.02.2019_00h00	7.08653e-08	2.43777e-07	[7]	Group77	8.43373
GO:0001952	regulation of cell-matrix adhesion	GO_BiologicalProcess-EBI-UniProt-GOA_27.02.2019_00h00	2.04702e-07	5.14652e-07	[4, 5]	Group245	8.33333	[4			GO:0016202	regulation of striated muscle tissue development	GO_BiologicalProcess-EBI-UniProt-GOA_27.02.2019_00h00	7.39025e-08	2.5088e-07	[4, 5, 6, 7, 8]	Group32	5.08475
GO:0031346	positive regulation of cell projection organization	GO_BiologicalProcess-EBI-UniProt-GOA_27.02.2019_00h00	2.60964e-07	6.45946e-07	[4, 5, 6]	Group339	4.78927	[4			GO:0001657	ureteric bud development	GO_BiologicalProcess-EBI-UniProt-GOA_27.02.2019_00h00	8.32087e-08	2.78803e-07	[5, 6, 8, 9, 10, 11]	Group71	6.25
GO:1901888	regulation of cell junction assembly	GO_BiologicalProcess-EBI-UniProt-GOA_27.02.2019_00h00	5.11345e-07	1.18327e-06	[3, 4, 5]	Group391	9.23077	[3			GO:0061035	regulation of cartilage development	GO_BiologicalProcess-EBI-UniProt-GOA_27.02.2019_00h00	1.06481e-07	3.39163e-07	[4, 5, 6, 7]	Group36	7.95455
GO:0008306	associative learning	GO_BiologicalProcess-EBI-UniProt-GOA_27.02.2019_00h00	5.19448e-07	1.19855e-06	[4, 7]	Group433	10.2804	[4			GO:0072073	kidney epithelium development	GO_BiologicalProcess-EBI-UniProt-GOA_27.02.2019_00h00	1.48217e-07	4.66341e-07	[5, 6, 7, 8]	Group24	4.6875
GO:0010506	regulation of autophagy	GO_BiologicalProcess-EBI-UniProt-GOA_27.02.2019_00h00	6.09712e-07	1.38681e-06	[4, 5, 6]	Group405	5.22388	[4			GO:0062013	positive regulation of small molecule metabolic process	GO_BiologicalProcess-EBI-UniProt-GOA_27.02.2019_00h00	1.54923e-07	4.75834e-07	[3, 4, 5]	Group09	4.66321
GO:0045685	regulation of glial cell differentiation	GO_BiologicalProcess-EBI-UniProt-GOA_27.02.2019_00h00	7.51578e-07	1.67846e-06	[5, 7, 8, 9, 10]	Group438	11.236	[5			GO:0035148	tube formation	GO_BiologicalProcess-EBI-UniProt-GOA_27.02.2019_00h00	1.54923e-07	4.75834e-07	[3, 4, 5, 6]	Group37	4.66321
GO:0051894	positive regulation of focal adhesion assembly	GO_BiologicalProcess-EBI-UniProt-GOA_27.02.2019_00h00	1.19454e-06	2.57423e-06	[4, 5, 6, 7, 8, 9]	Group424	18.4211	[4			GO:0045667	regulation of osteoblast differentiation	GO_BiologicalProcess-EBI-UniProt-GOA_27.02.2019_00h00	1.66621e-07	4.94117e-07	[4, 5]	Group23	5.71429
GO:0051017	actin filament bundle assembly	GO_BiologicalProcess-EBI-UniProt-GOA_27.02.2019_00h00	1.79404e-06	3.74012e-06	[4, 6, 8]	Group384	6.96517	[4			GO:0031016	pancreas development	GO_BiologicalProcess-EBI-UniProt-GOA_27.02.2019_00h00	2.57496e-07	7.38156e-07	[4, 5, 6]	Group12	7
GO:2001233	regulation of apoptotic signaling pathway	GO_BiologicalProcess-EBI-UniProt-GOA_27.02.2019_00h00	1.88404e-06	3.92263e-06	[4, 5, 6, 7]	Group255	4.41989	[4			GO:0003179	heart valve morphogenesis	GO_BiologicalProcess-EBI-UniProt-GOA_27.02.2019_00h00	3.07916e-07	8.63505e-07	[3, 4, 6, 7, 8]	Group76	9.52381
GO:0021782	glial cell development	GO_BiologicalProcess-EBI-UniProt-GOA_27.02.2019_00h00	2.35576e-06	4.85419e-06	[4, 5, 7, 8, 9]	Group040	8	[4			GO:2000793	cell proliferation involved in heart valve development	GO_BiologicalProcess-EBI-UniProt-GOA_27.02.2019_00h00	3.12374e-07	8.66585e-07	[2, 4, 6, 7, 8]	Group76	75
GO:0005024	transforming growth factor beta-activated receptor activity	GO_BiologicalProcess-EBI-UniProt-GOA_27.02.2019_00h00	2.56109e-06	5.25023e-06	[7, 8, 9, 10, 11]	Group435	31.25	[7			GO:0002067	glandular epithelial cell differentiation	GO_BiologicalProcess-EBI-UniProt-GOA_27.02.2019_00h00	3.38598e-07	9.19561e-07	[6, 7]	Group70	9.375
GO:0008631	intrinsic apoptotic signaling pathway in response to oxidative stress	GO_BiologicalProcess-EBI-UniProt-GOA_27.02.2019_00h00	3.8624e-06	7.67203e-06	[4, 5, 6, 7]	Group385	12.6984	[4			GO:0010594	regulation of endothelial cell migration	GO_BiologicalProcess-EBI-UniProt-GOA_27.02.2019_00h00	4.01829e-07	1.05788e-06	[4, 5, 6, 7, 8]	Group72	4.16667
GO:0048708	astrocyte differentiation	GO_BiologicalProcess-EBI-UniProt-GOA_27.02.2019_00h00	5.2822e-06	1.02627e-05	[5, 6, 7, 8, 9]	Group328	9.09091	[5			GO:0048639	positive regulation of developmental growth	GO_BiologicalProcess-EBI-UniProt-GOA_27.02.2019_00h00	4.87031e-07	1.2441e-06	[3, 4, 5]	Group57	4.0724
GO:0070102	interleukin-6-mediated signaling pathway	GO_BiologicalProcess-EBI-UniProt-GOA_27.02.2019_00h00	8.66116e-06	1.62169e-05	[5, 6, 7]	Group668	25	[5			GO:0001838	embryonic epithelial tube formation	GO_BiologicalProcess-EBI-UniProt-GOA_27.02.2019_00h00	5.86382e-07	1.4688e-06	[5, 6, 7, 8]	Group64	4.84848
GO:0051893	regulation of focal adhesion assembly	GO_BiologicalProcess-EBI-UniProt-GOA_27.02.2019_00h00	9.40558e-06	1.74878e-05	[5, 6, 7, 8]	Group156	9.67742	[5			GO:0001837	epithelial to mesenchymal transition	GO_BiologicalProcess-EBI-UniProt-GOA_27.02.2019_00h00	6.42555e-07	1.57885e-06	[5, 6, 7, 8]	Group13	4.79042
GO:0034401	chromatin organization involved in regulation of transcription	GO_BiologicalProcess-EBI-UniProt-GOA_27.02.2019_00h00	9.68714e-06	1.79695e-05	[4, 6, 7, 8, 9, 10, 11]	Group362	7.63889	[4			GO:0014031	mesenchymal cell development	GO_BiologicalProcess-EBI-UniProt-GOA_27.02.2019_00h00	6.68886e-07	1.62804e-06	[4, 5, 6, 7, 8]	Group47	6.08696
GO:2001234	negative regulation of apoptotic signaling pathway	GO_BiologicalProcess-EBI-UniProt-GOA_27.02.2019_00h00	1.2923e-05	2.33754e-05	[4, 5, 6, 7, 8]	Group420	5.2459	[4			GO:0061036	positive regulation of cartilage development	GO_BiologicalProcess-EBI-UniProt-GOA_27.02.2019_00h00	8.96693e-07	2.10315e-06	[3, 4, 5, 6, 7, 8]	Group36	12.1951
GO:1990090	cellular response to nerve growth factor stimulus	GO_BiologicalProcess-EBI-UniProt-GOA_27.02.2019_00h00	1.30674e-05	2.35566e-05	[4, 6]	Group586	10.8108	[4			GO:0043537	negative regulation of blood vessel endothelial cell migration	GO_BiologicalProcess-EBI-UniProt-GOA_27.02.2019_00h00	1.01441e-06	2.33677e-06	[5, 6, 7, 8, 9, 10]	Group07	11.9048
GO:0045814	negative regulation of gene expression, epigenetic	GO_BiologicalProcess-EBI-UniProt-GOA_27.02.2019_00h00	1.71914e-05	3.02743e-05	[5, 6, 7]	Group302	7.18954	[5			GO:1905564	positive regulation of vascular endothelial cell proliferation	GO_BiologicalProcess-EBI-UniProt-GOA_27.02.2019_00h00	1.20777e-06	2.70961e-06	[5, 6, 7, 8]	Group07	21.0526
GO:0048169	regulation of long-term neuronal synaptic plasticity	GO_BiologicalProcess-EBI-UniProt-GOA_27.02.2019_00h00	2.10227e-05	3.64988e-05	[5, 7, 8, 9, 10, 11]	Group112	15.3846	[5			GO:0002066	columnar/cuboidal epithelial cell development	GO_BiologicalProcess-EBI-UniProt-GOA_27.02.2019_00h00	1.28414e-06	2.85611e-06	[5, 6, 7]	Group70	7.5
GO:0050321	tau-protein kinase activity	GO_BiologicalProcess-EBI-UniProt-GOA_27.02.2019_00h00	2.82655e-05	4.78777e-05	[8, 9]	Group019	14.6341	[8			GO:0003230	cardiac atrium development	GO_BiologicalProcess-EBI-UniProt-GOA_27.02.2019_00h00	1.44215e-06	3.15318e-06	[4, 6, 7, 8]	Group76	11.1111
GO:2001242	regulation of intrinsic apoptotic signaling pathway	GO_BiologicalProcess-EBI-UniProt-GOA_27.02.2019_00h00	2.97221e-05	5.00797e-05	[5, 6, 7, 8]	Group106	5.80357	[5			GO:0043388	positive regulation of DNA binding	GO_BiologicalProcess-EBI-UniProt-GOA_27.02.2019_00h00	1.48606e-06	3.22188e-06	[5]	Group34	7.31707
GO:0048713	regulation of oligodendrocyte differentiation	GO_BiologicalProcess-EBI-UniProt-GOA_27.02.2019_00h00	3.25718e-05	5.44224e-05	[6, 7, 8, 9, 10, 11]	Group241	14.2857	[6			GO:0070849	response to epidermal growth factor	GO_BiologicalProcess-EBI-UniProt-GOA_27.02.2019_00h00	1.71321e-06	3.62301e-06	[3, 5]	Group39	7.14286
GO:0071634	regulation of transforming growth factor beta production	GO_BiologicalProcess-EBI-UniProt-GOA_27.02.2019_00h00	7.07589e-05	0.0001106	[4, 5]	Group065	12.5	[4			GO:0010634	positive regulation of epithelial cell migration	GO_BiologicalProcess-EBI-UniProt-GOA_27.02.2019_00h00	1.69948e-06	3.62367e-06	[3, 4, 5, 6, 7, 8]	Group72	4.21053
GO:0034349	glial cell apoptotic process	GO_BiologicalProcess-EBI-UniProt-GOA_27.02.2019_00h00	9.42979e-05	0.000143739	[5]	Group320	23.5294	[5]			GO:0009267	cellular response to starvation	GO_BiologicalProcess-EBI-UniProt-GOA_27.02.2019_00h00	1.83798e-06	3.85527e-06	[4, 5, 6]	Group09	4.16667
GO:0120193	tight junction organization	GO_BiologicalProcess-EBI-UniProt-GOA_27.02.2019_00h00	0.000108376	0.000162716	[5]	Group347	9.45946	[5]			GO:0003279	cardiac septum development	GO_BiologicalProcess-EBI-UniProt-GOA_27.02.2019_00h00	2.17478e-06	4.52494e-06	[3, 4, 6, 7, 8]	Group76	5.10949
GO:0007613	memory	GO_BiologicalProcess-EBI-UniProt-GOA_27.02.2019_00h00	0.000127629	0.000189313	[3, 6]	Group081	6.28931	[3			GO:0071732	cellular response to nitric oxide	GO_BiologicalProcess-EBI-UniProt-GOA_27.02.2019_00h00	2.72301e-06	5.53179e-06	[5, 6]	Group05	17.3913
GO:0005025	transforming growth factor beta receptor activity, type I	GO_BiologicalProcess-EBI-UniProt-GOA_27.02.2019_00h00	0.000167629	0.000243893	[8, 9, 10, 11, 12]	Group418	37.5	[8			GO:2000739	regulation of mesenchymal stem cell differentiation	GO_BiologicalProcess-EBI-UniProt-GOA_27.02.2019_00h00	2.70765e-06	5.54424e-06	[5, 6]	Group36	42.8571
GO:0002758	innate immune response	GO_BiologicalProcess-EBI-UniProt-GOA_27.02.2019_00h00	0.000242692	0.00034342	[4, 5, 6, 7, 8, 9]	Group688	4.09207	[4			GO:0071371	cellular response to gonadotropin stimulus	GO_BiologicalProcess-EBI-UniProt-GOA_27.02.2019_00h00	3.25684e-06	6.46357e-06	[5, 6]	Group37	16.6667
GO:0038113	interleukin-9-mediated signaling pathway	GO_BiologicalProcess-EBI-UniProt-GOA_27.02.2019_00h00	0.000248703	0.000351304	[5, 6, 7]	Group575	33.3333	[5			GO:0010718	positive regulation of epithelial to mesenchymal transition	GO_BiologicalProcess-EBI-UniProt-GOA_27.02.2019_00h00	4.34347e-06	8.36279e-06	[3, 4, 5, 6, 7, 8, 9, 10]	Group13	8.92857
GO:0061647	histone H3-K9 modification	GO_BiologicalProcess-EBI-UniProt-GOA_27.02.2019_00h00	0.000272827	0.000382006	[6, 7, 8]	Group413	9.83607	[6			GO:2000134	negative regulation of G1/S transition of mitotic cell cycle	GO_BiologicalProcess-EBI-UniProt-GOA_27.02.2019_00h00	5.60174e-06	1.03975e-05	[6, 7, 8, 9]	Group18	4.43038
GO:0001818	negative regulation of cytokine production	GO_BiologicalProcess-EBI-UniProt-GOA_27.02.2019_00h00	0.000321453	0.000444256	[3, 4, 5]	Group047	4.15512	[3			GO:0072422	signal transduction involved in DNA damage checkpoint	GO_BiologicalProcess-EBI-UniProt-GOA_27.02.2019_00h00	5.96873e-06	1.09995e-05	[5, 6, 7, 8, 9]	Group27	5.76923
GO:0021915	neural tube development	GO_BiologicalProcess-EBI-UniProt-GOA_27.02.2019_00h00	0.000334436	0.000460209	[4, 5, 6, 7]	Group508	5.16432	[4			GO:0030510	regulation of BMP signaling pathway	GO_BiologicalProcess-EBI-UniProt-GOA_27.02.2019_00h00	7.82933e-06	1.42251e-05	[4, 5, 6, 7, 8, 9, 10, 11, 12, 13]	Group08	5.50459
GO:0033129	positive regulation of histone phosphorylation	GO_BiologicalProcess-EBI-UniProt-GOA_27.02.2019_00h00	0.000351421	0.000481924	[6, 7, 8, 9, 10]	Group036	30	[6			GO:0001656	metanephros development	GO_BiologicalProcess-EBI-UniProt-GOA_27.02.2019_00h00	1.06558e-05	1.88302e-05	[5, 6, 7, 8]	Group21	5.21739
GO:0032727	positive regulation of interferon-alpha production	GO_BiologicalProcess-EBI-UniProt-GOA_27.02.2019_00h00	0.000714094	0.000928322	[5, 6, 7]	Group090	14.2857	[5			GO:2000679	positive regulation of transcription regulatory region DNA binding	GO_BiologicalProcess-EBI-UniProt-GOA_27.02.2019_00h00	1.07343e-05	1.88398e-05	[6]	Group15	12.5
GO:2001243	negative regulation of intrinsic apoptotic signaling pathway	GO_BiologicalProcess-EBI-UniProt-GOA_27.02.2019_00h00	0.000805016	0.00103976	[5, 6, 7, 8, 9]	Group658	6.01504	[5			GO:0060561	apoptotic process involved in morphogenesis	GO_BiologicalProcess-EBI-UniProt-GOA_27.02.2019_00h00	1.21746e-05	2.12233e-05	[3, 4, 6]	Group36	12.1212
GO:0016573	histone acetylation	GO_BiologicalProcess-EBI-UniProt-GOA_27.02.2019_00h00	0.000923749	0.00118261	[6, 7, 8, 10, 11]	Group220	4.90196	[6			GO:0001938	positive regulation of endothelial cell proliferation	GO_BiologicalProcess-EBI-UniProt-GOA_27.02.2019_00h00	1.23505e-05	2.13855e-05	[4, 5, 6, 7]	Group72	5.08475
GO:1990138	neuron projection extension	GO_BiologicalProcess-EBI-UniProt-GOA_27.02.2019_00h00	0.00119249	0.00149787	[4, 5, 6, 7, 8, 9, 10, 11, 12]	Group137	4.73934	[4			GO:0090183	regulation of kidney development	GO_BiologicalProcess-EBI-UniProt-GOA_27.02.2019_00h00	1.31233e-05	2.24226e-05	[4, 5, 6, 7, 8]	Group37	7.14286
GO:0035066	positive regulation of histone acetylation	GO_BiologicalProcess-EBI-UniProt-GOA_27.02.2019_00h00	0.00134706	0.00167622	[6, 7, 8, 9, 10, 11, 12, 13]	Group456	12.1212	[6			GO:0002068	glandular epithelial cell development	GO_BiologicalProcess-EBI-UniProt-GOA_27.02.2019_00h00	1.37524e-05	2.31904e-05	[6, 7, 8]	Group70	11.7647
GO:1904646	cellular response to amyloid-beta	GO_BiologicalProcess-EBI-UniProt-GOA_27.02.2019_00h00	0.00149981	0.00185189	[6, 7]	Group615	8.77193	[6			GO:0097366	response to bronchodilator	GO_BiologicalProcess-EBI-UniProt-GOA_27.02.2019_00h00	1.50684e-05	2.50817e-05	[4]	Group05	6.94444
GO:0038061	NIK/NF-kappaB signaling	GO_BiologicalProcess-EBI-UniProt-GOA_27.02.2019_00h00	0.0018599	0.00225472	[4, 5, 6]	Group316	4.46429	[4			GO:0045669	positive regulation of osteoblast differentiation	GO_BiologicalProcess-EBI-UniProt-GOA_27.02.2019_00h00	1.72313e-05	2.84979e-05	[4, 5, 6]	Group13	6.75676
GO:0031060	regulation of histone methylation	GO_BiologicalProcess-EBI-UniProt-GOA_27.02.2019_00h00	0.00253201	0.00300571	[6, 7, 8, 9, 10]	Group228	6.45161	[6			GO:0055006	cardiac cell development	GO_BiologicalProcess-EBI-UniProt-GOA_27.02.2019_00h00	1.79577e-05	2.95101e-05	[4, 5, 6, 7, 8]	Group24	4.7619
GO:0032602	chemokine production	GO_BiologicalProcess-EBI-UniProt-GOA_27.02.2019_00h00	0.00316897	0.00370409	[3]	Group089	5.38462	[3]			GO:1903431	positive regulation of cell maturation	GO_BiologicalProcess-EBI-UniProt-GOA_27.02.2019_00h00	2.17129e-05	3.50121e-05	[4, 5, 6, 7]	Group64	23.0769
GO:0032700	negative regulation of interleukin-17 production	GO_BiologicalProcess-EBI-UniProt-GOA_27.02.2019_00h00	0.0039571	0.00455536	[4, 5, 6]	Group011	13.6364	[4			GO:0003176	aortic valve development	GO_BiologicalProcess-EBI-UniProt-GOA_27.02.2019_00h00	2.16023e-05	3.50527e-05	[5, 7, 8, 9]	Group34	10.5263
GO:1903202	negative regulation of oxidative stress-induced cell death	GO_BiologicalProcess-EBI-UniProt-GOA_27.02.2019_00h00	0.00499081	0.0056638	[4, 5, 6, 7, 8]	Group253	6.66667	[4			GO:0006977	DNA damage response, signal transduction by p53 class mediator resulting in cell cycle arrest	GO_BiologicalProcess-EBI-UniProt-GOA_27.02.2019_00h00	2.84053e-05	4.55191e-05	[5, 6, 7, 8, 9, 10, 11, 12, 13]	Group18	6.09756
GO:0032675	regulation of interleukin-6 production	GO_BiologicalProcess-EBI-UniProt-GOA_27.02.2019_00h00	0.00567744	0.00639311	[4, 5]	Group132	4.3956	[4			GO:0043550	regulation of lipid kinase activity	GO_BiologicalProcess-EBI-UniProt-GOA_27.02.2019_00h00	3.01238e-05	4.76807e-05	[5, 6, 7, 8, 9]	Group28	6.0241
GO:0060291	long-term synaptic potentiation	GO_BiologicalProcess-EBI-UniProt-GOA_27.02.2019_00h00	0.0071558	0.0079349	[4, 5, 6, 7, 8, 9, 10]	Group165	5.21739	[4			GO:0010595	positive regulation of endothelial cell migration	GO_BiologicalProcess-EBI-UniProt-GOA_27.02.2019_00h00	3.00581e-05	4.78703e-05	[4, 5, 6, 7, 8, 9]	Group72	4.34783
GO:1902176	negative regulation of oxidative stress-induced intrinsic apoptotic signaling pathway	GO_BiologicalProcess-EBI-UniProt-GOA_27.02.2019_00h00	0.00788848	0.00869909	[5, 6, 7, 8, 9, 10]	Group459	10.7143	[5			GO:0051785	positive regulation of nuclear division	GO_BiologicalProcess-EBI-UniProt-GOA_27.02.2019_00h00	3.1922e-05	5.02187e-05	[5, 6, 7]	Group15	5.95238
GO:0051932	synaptic transmission, GABAergic	GO_BiologicalProcess-EBI-UniProt-GOA_27.02.2019_00h00	0.00928748	0.010137	[7, 8]	Group454	7.14286	[7			GO:0008608	attachment of spindle microtubules to kinetochore	GO_BiologicalProcess-EBI-UniProt-GOA_27.02.2019_00h00	3.23275e-05	5.05484e-05	[3, 4, 5]	Group15	9.52381
GO:0097734	extracellular exosome biogenesis	GO_BiologicalProcess-EBI-UniProt-GOA_27.02.2019_00h00	0.0104791	0.0113755	[4]	Group023	9.67742	[4]			GO:0002062	chondrocyte differentiation	GO_BiologicalProcess-EBI-UniProt-GOA_27.02.2019_00h00	3.53018e-05	5.4538e-05	[4, 5, 6, 7]	Group36	4.22535
GO:0051571	positive regulation of histone H3-K4 methylation	GO_BiologicalProcess-EBI-UniProt-GOA_27.02.2019_00h00	0.0104791	0.0113755	[7, 8, 9, 10, 11, 12, 13]	Group406	9.67742	[7			GO:1900180	regulation of protein localization to nucleus	GO_BiologicalProcess-EBI-UniProt-GOA_27.02.2019_00h00	3.96971e-05	6.06027e-05	[5, 6, 7]	Group27	4.13793
GO:0043967	histone H4 acetylation	GO_BiologicalProcess-EBI-UniProt-GOA_27.02.2019_00h00	0.011131	0.0120341	[7, 8, 9, 11, 12]	Group306	5.49451	[7			GO:0019218	regulation of steroid metabolic process	GO_BiologicalProcess-EBI-UniProt-GOA_27.02.2019_00h00	4.62297e-05	6.81557e-05	[5, 6]	Group11	4.02685
GO:0106027	neuron projection organization	GO_BiologicalProcess-EBI-UniProt-GOA_27.02.2019_00h00	0.0126541	0.0135889	[5]	Group251	4.61538	[5]			GO:0046686	response to cadmium ion	GO_BiologicalProcess-EBI-UniProt-GOA_27.02.2019_00h00	4.94891e-05	7.21367e-05	[5]	Group26	5.43478
GO:0061640	cytoskeleton-dependent cytokinesis	GO_BiologicalProcess-EBI-UniProt-GOA_27.02.2019_00h00	0.0140333	0.0149795	[4, 5]	Group684	4.51128	[4			GO:0033619	membrane protein proteolysis	GO_BiologicalProcess-EBI-UniProt-GOA_27.02.2019_00h00	5.48661e-05	7.90807e-05	[5, 6]	Group64	5.31915
GO:0032655	regulation of interleukin-12 production	GO_BiologicalProcess-EBI-UniProt-GOA_27.02.2019_00h00	0.0171037	0.0180878	[4, 5]	Group159	5.97015	[4			GO:0061045	negative regulation of wound healing	GO_BiologicalProcess-EBI-UniProt-GOA_27.02.2019_00h00	6.06837e-05	8.60241e-05	[4, 5, 6, 7]	Group19	5.20833
GO:0032653	regulation of interleukin-10 production	GO_BiologicalProcess-EBI-UniProt-GOA_27.02.2019_00h00	0.017968	0.0189893	[4, 5]	Group455	5.88235	[4			GO:0060411	cardiac septum morphogenesis	GO_BiologicalProcess-EBI-UniProt-GOA_27.02.2019_00h00	6.06837e-05	8.60241e-05	[3, 4, 5, 6, 7, 8, 9]	Group36	5.20833
GO:0032731	positive regulation of interleukin-1 beta production	GO_BiologicalProcess-EBI-UniProt-GOA_27.02.2019_00h00	0.0197768	0.020791	[5, 6, 7]	Group236	5.71429	[5			GO:0048701	embryonic cranial skeleton morphogenesis	GO_BiologicalProcess-EBI-UniProt-GOA_27.02.2019_00h00	8.15623e-05	0.000113135	[4, 6, 7, 8, 9]	Group21	7.54717
GO:0070423	nucleotide-binding oligomerization domain containing signaling pathway	GO_BiologicalProcess-EBI-UniProt-GOA_27.02.2019_00h00	0.0252959	0.026265	[5, 6, 7, 8, 9, 10, 11, 12]	Group279	6.97674	[5			GO:0035137	hindlimb morphogenesis	GO_BiologicalProcess-EBI-UniProt-GOA_27.02.2019_00h00	8.15623e-05	0.000113135	[5, 6, 7]	Group70	7.54717
GO:0098631	cell adhesion mediator activity	GO_BiologicalProcess-EBI-UniProt-GOA_27.02.2019_00h00	0.0304744	0.0314581	[3]	Group669	5	[3]			GO:0007494	midgut development	GO_BiologicalProcess-EBI-UniProt-GOA_27.02.2019_00h00	9.84737e-05	0.000135139	[5, 6, 7]	Group64	14.2857
GO:0097009	energy homeostasis	GO_BiologicalProcess-EBI-UniProt-GOA_27.02.2019_00h00	0.0354271	0.0363361	[3, 5]	Group461	6.12245	[3			GO:0048546	digestive tract morphogenesis	GO_BiologicalProcess-EBI-UniProt-GOA_27.02.2019_00h00	0.000101298	0.000138279	[4, 5, 6, 7]	Group21	7.14286
GO:0007129	synapsis	GO_BiologicalProcess-EBI-UniProt-GOA_27.02.2019_00h00	0.0452329	0.0460391	[4, 5, 6, 7, 8, 9]	Group039	5.55556	[4			GO:0010883	regulation of lipid storage	GO_BiologicalProcess-EBI-UniProt-GOA_27.02.2019_00h00	0.000132729	0.000176516	[3, 4, 5]	Group11	6.66667
GO:0040008	regulation of growth	GO_BiologicalProcess-EBI-UniProt-GOA_27.02.2019_00h00	2.8804e-20	4.7482e-19	[2, 3]	Group232	6.21532	[2	Biological processes related to metabolism, cell signalling etc		GO:0048599	oocyte development	GO_BiologicalProcess-EBI-UniProt-GOA_27.02.2019_00h00	0.000132729	0.000176516	[4, 5, 6, 7, 8, 9]	Group15	6.66667
GO:0040012	regulation of locomotion	GO_BiologicalProcess-EBI-UniProt-GOA_27.02.2019_00h00	7.07405e-19	8.90662e-18	[2, 3]	Group299	5.13644	[2			GO:0046427	positive regulation of receptor signaling pathway via JAK-STAT	GO_BiologicalProcess-EBI-UniProt-GOA_27.02.2019_00h00	0.000142876	0.000189035	[5, 6, 7, 8, 9]	Group31	4.34783
GO:0045321	leukocyte activation	GO_BiologicalProcess-EBI-UniProt-GOA_27.02.2019_00h00	4.33823e-17	3.98669e-16	[2, 3]	Group504	4.31138	[2			GO:1903725	regulation of phospholipid metabolic process	GO_BiologicalProcess-EBI-UniProt-GOA_27.02.2019_00h00	0.000148807	0.000194884	[5, 6, 7]	Group25	4.31034
GO:0003006	developmental process involved in reproduction	GO_BiologicalProcess-EBI-UniProt-GOA_27.02.2019_00h00	1.92292e-15	1.44354e-14	[2, 3]	Group597	5.53633	[2			GO:0032332	positive regulation of chondrocyte differentiation	GO_BiologicalProcess-EBI-UniProt-GOA_27.02.2019_00h00	0.000148457	0.000195418	[4, 5, 6, 7, 8, 9]	Group36	12.5
GO:0030155	regulation of cell adhesion	GO_BiologicalProcess-EBI-UniProt-GOA_27.02.2019_00h00	3.55139e-15	2.54649e-14	[2, 3]	Group671	5.44835	[2			GO:0035196	production of miRNAs involved in gene silencing by miRNA	GO_BiologicalProcess-EBI-UniProt-GOA_27.02.2019_00h00	0.000150844	0.000196554	[5, 6, 8, 9, 10, 11]	Group35	6.45161
GO:0044089	positive regulation of cellular component biogenesis	GO_BiologicalProcess-EBI-UniProt-GOA_27.02.2019_00h00	5.89075e-14	3.56792e-13	[2, 3, 4]	Group341	5.93472	[2			GO:0008585	female gonad development	GO_BiologicalProcess-EBI-UniProt-GOA_27.02.2019_00h00	0.000167737	0.000216381	[5, 6, 7, 8]	Group11	4.20168
GO:0042330	taxis	GO_BiologicalProcess-EBI-UniProt-GOA_27.02.2019_00h00	3.53371e-11	1.56956e-10	[2, 3]	Group404	4.84262	[2			GO:0032964	collagen biosynthetic process	GO_BiologicalProcess-EBI-UniProt-GOA_27.02.2019_00h00	0.000170681	0.000219084	[3]	Group13	6.25
GO:1903829	positive regulation of cellular protein localization	GO_BiologicalProcess-EBI-UniProt-GOA_27.02.2019_00h00	1.13828e-08	3.56187e-08	[2, 3, 4, 5, 6]	Group271	5.83942	[2			GO:0070167	regulation of biomineral tissue development	GO_BiologicalProcess-EBI-UniProt-GOA_27.02.2019_00h00	0.000174439	0.000222798	[4, 5, 6, 7]	Group23	4.16667
GO:0050900	leukocyte migration	GO_BiologicalProcess-EBI-UniProt-GOA_27.02.2019_00h00	3.20317e-08	9.19544e-08	[2, 4, 5]	Group333	4.63679	[2			GO:0048103	somatic stem cell division	GO_BiologicalProcess-EBI-UniProt-GOA_27.02.2019_00h00	0.000263857	0.000328865	[4]	Group53	10.3448
GO:0001776	leukocyte homeostasis	GO_BiologicalProcess-EBI-UniProt-GOA_27.02.2019_00h00	1.94397e-07	4.90286e-07	[2, 5]	Group325	10.084	[2			GO:0031293	membrane protein intracellular domain proteolysis	GO_BiologicalProcess-EBI-UniProt-GOA_27.02.2019_00h00	0.000263857	0.000328865	[6, 7]	Group64	10.3448
GO:0051051	negative regulation of transport	GO_BiologicalProcess-EBI-UniProt-GOA_27.02.2019_00h00	6.71832e-07	1.51518e-06	[2, 3, 4, 5]	Group055	4.3131	[2			GO:0060563	neuroepithelial cell differentiation	GO_BiologicalProcess-EBI-UniProt-GOA_27.02.2019_00h00	0.000269188	0.000333897	[6, 7]	Group37	5.55556
GO:0016458	gene silencing	GO_BiologicalProcess-EBI-UniProt-GOA_27.02.2019_00h00	7.77135e-07	1.72829e-06	[2, 5, 6, 7]	Group500	5.58824	[2			GO:1904705	regulation of vascular smooth muscle cell proliferation	GO_BiologicalProcess-EBI-UniProt-GOA_27.02.2019_00h00	0.000283859	0.00035041	[4, 5, 6]	Group06	5.47945
GO:0035264	multicellular organism growth	GO_BiologicalProcess-EBI-UniProt-GOA_27.02.2019_00h00	6.06565e-06	1.16574e-05	[2, 3]	Group210	6.73575	[2			GO:0002042	cell migration involved in sprouting angiogenesis	GO_BiologicalProcess-EBI-UniProt-GOA_27.02.2019_00h00	0.000283859	0.00035041	[5, 6, 7, 8, 9, 10, 11, 12]	Group30	5.47945
GO:0043902	positive regulation of multi-organism process	GO_BiologicalProcess-EBI-UniProt-GOA_27.02.2019_00h00	0.000244005	0.000344973	[2, 3, 4]	Group218	5	[2			GO:1903078	positive regulation of protein localization to plasma membrane	GO_BiologicalProcess-EBI-UniProt-GOA_27.02.2019_00h00	0.000314909	0.000386888	[4, 5, 6, 7, 8]	Group26	5.33333
GO:0042698	ovulation cycle	GO_BiologicalProcess-EBI-UniProt-GOA_27.02.2019_00h00	0.00170089	0.00207771	[2, 3, 4]	Group284	6.97674	[2			GO:0061005	cell differentiation involved in kidney development	GO_BiologicalProcess-EBI-UniProt-GOA_27.02.2019_00h00	0.000314909	0.000386888	[4, 5, 6, 7, 8]	Group37	5.33333
GO:2000241	regulation of reproductive process	GO_BiologicalProcess-EBI-UniProt-GOA_27.02.2019_00h00	0.00313984	0.0036754	[2, 3]	Group490	4.45545	[2			GO:0010611	regulation of cardiac muscle hypertrophy	GO_BiologicalProcess-EBI-UniProt-GOA_27.02.2019_00h00	0.000331313	0.000403202	[4, 5, 6, 7]	Group15	5.26316
GO:0010604	positive regulation of macromolecule metabolic process	GO_BiologicalProcess-EBI-UniProt-GOA_27.02.2019_00h00	2.09409e-39	1.67422e-36	[3, 4, 5]	Group635	4.01003	[3			GO:2000637	positive regulation of gene silencing by miRNA	GO_BiologicalProcess-EBI-UniProt-GOA_27.02.2019_00h00	0.000389086	0.000469085	[4, 5, 6, 7, 8, 9, 10, 11, 12]	Group35	9.09091
GO:0051173	positive regulation of nitrogen compound metabolic process	GO_BiologicalProcess-EBI-UniProt-GOA_27.02.2019_00h00	1.09193e-37	3.49199e-35	[3, 4, 5]	Group537	4.03141	[3			GO:0060317	cardiac epithelial to mesenchymal transition	GO_BiologicalProcess-EBI-UniProt-GOA_27.02.2019_00h00	0.000389086	0.000469085	[5, 6, 7, 8, 9]	Group56	9.09091
GO:0051172	negative regulation of nitrogen compound metabolic process	GO_BiologicalProcess-EBI-UniProt-GOA_27.02.2019_00h00	2.35073e-32	2.68487e-30	[3, 4, 5]	Group656	4.31679	[3			GO:0030878	thyroid gland development	GO_BiologicalProcess-EBI-UniProt-GOA_27.02.2019_00h00	0.000389086	0.000469085	[5, 6, 7]	Group71	9.09091
GO:2000026	regulation of multicellular organismal development	GO_BiologicalProcess-EBI-UniProt-GOA_27.02.2019_00h00	1.39154e-29	1.11253e-27	[3, 4]	Group680	4.48413	[3			GO:0072091	regulation of stem cell proliferation	GO_BiologicalProcess-EBI-UniProt-GOA_27.02.2019_00h00	0.000403092	0.000483711	[3, 4, 5]	Group31	5
GO:0009968	negative regulation of signal transduction	GO_BiologicalProcess-EBI-UniProt-GOA_27.02.2019_00h00	1.2318e-18	1.48093e-17	[3, 4, 5, 6]	Group650	4.60358	[3			GO:0030325	adrenal gland development	GO_BiologicalProcess-EBI-UniProt-GOA_27.02.2019_00h00	0.000425408	0.000508127	[5, 6, 7]	Group19	8.82353
GO:0048608	reproductive structure development	GO_BiologicalProcess-EBI-UniProt-GOA_27.02.2019_00h00	8.2886e-17	7.16404e-16	[3, 4, 5, 6]	Group409	7.22022	[3			GO:0046824	positive regulation of nucleocytoplasmic transport	GO_BiologicalProcess-EBI-UniProt-GOA_27.02.2019_00h00	0.000463757	0.00055138	[4, 5, 6, 7, 8]	Group10	4.81928
GO:0045596	negative regulation of cell differentiation	GO_BiologicalProcess-EBI-UniProt-GOA_27.02.2019_00h00	2.01726e-16	1.68e-15	[3, 4, 5]	Group359	5.54951	[3			GO:0055093	response to hyperoxia	GO_BiologicalProcess-EBI-UniProt-GOA_27.02.2019_00h00	0.000504429	0.000591558	[3, 5]	Group65	8.33333
GO:0044770	cell cycle phase transition	GO_BiologicalProcess-EBI-UniProt-GOA_27.02.2019_00h00	6.69588e-15	4.63494e-14	[3, 4]	Group527	5.67465	[3			GO:0032835	glomerulus development	GO_BiologicalProcess-EBI-UniProt-GOA_27.02.2019_00h00	0.000507648	0.000592638	[3, 4, 6, 7, 8, 9]	Group24	4.70588
GO:0010948	negative regulation of cell cycle process	GO_BiologicalProcess-EBI-UniProt-GOA_27.02.2019_00h00	1.83546e-14	1.16464e-13	[3, 4, 5, 6]	Group281	7.02811	[3			GO:1905508	protein localization to microtubule organizing center	GO_BiologicalProcess-EBI-UniProt-GOA_27.02.2019_00h00	0.000547227	0.000635966	[8]	Group27	8.10811
GO:0046649	lymphocyte activation	GO_BiologicalProcess-EBI-UniProt-GOA_27.02.2019_00h00	2.26728e-14	1.42172e-13	[3, 4]	Group535	5.09886	[3			GO:1903670	regulation of sprouting angiogenesis	GO_BiologicalProcess-EBI-UniProt-GOA_27.02.2019_00h00	0.000554418	0.000641434	[5, 6, 7, 8, 9, 10, 11, 12]	Group30	4.5977
GO:0009790	embryo development	GO_BiologicalProcess-EBI-UniProt-GOA_27.02.2019_00h00	1.41244e-13	8.33393e-13	[3, 4]	Group408	4.44265	[3			GO:0010660	regulation of muscle cell apoptotic process	GO_BiologicalProcess-EBI-UniProt-GOA_27.02.2019_00h00	0.000578916	0.000666787	[6, 7]	Group42	4.54545
GO:0010632	regulation of epithelial cell migration	GO_BiologicalProcess-EBI-UniProt-GOA_27.02.2019_00h00	2.00266e-13	1.16871e-12	[3, 4, 5, 6, 7]	Group583	8.96552	[3			GO:1901983	regulation of protein acetylation	GO_BiologicalProcess-EBI-UniProt-GOA_27.02.2019_00h00	0.000657019	0.000743469	[6, 7, 8, 9]	Group17	4.3956
GO:0009887	animal organ morphogenesis	GO_BiologicalProcess-EBI-UniProt-GOA_27.02.2019_00h00	3.17715e-13	1.81438e-12	[3, 4, 5, 6]	Group445	4.35471	[3			GO:0090398	cellular senescence	GO_BiologicalProcess-EBI-UniProt-GOA_27.02.2019_00h00	0.000742314	0.000829078	[4]	Group17	4.25532
GO:0009894	regulation of catabolic process	GO_BiologicalProcess-EBI-UniProt-GOA_27.02.2019_00h00	3.34796e-13	1.90512e-12	[3, 4]	Group469	4.40816	[3			GO:0050918	positive chemotaxis	GO_BiologicalProcess-EBI-UniProt-GOA_27.02.2019_00h00	0.000835161	0.000924771	[4, 5]	Group07	4.12371
GO:0110110	positive regulation of animal organ morphogenesis	GO_BiologicalProcess-EBI-UniProt-GOA_27.02.2019_00h00	1.04615e-12	5.65135e-12	[3, 4, 5, 6, 7, 8]	Group398	16.3265	[3			GO:0070423	nucleotide-binding oligomerization domain containing signaling pathway	GO_BiologicalProcess-EBI-UniProt-GOA_27.02.2019_00h00	0.000853035	0.000940525	[5, 6, 7, 8, 9, 10, 11, 12]	Group77	6.97674
GO:0071214	cellular response to abiotic stimulus	GO_BiologicalProcess-EBI-UniProt-GOA_27.02.2019_00h00	1.20429e-12	6.41888e-12	[3, 4]	Group147	6.85841	[3			GO:0051154	negative regulation of striated muscle cell differentiation	GO_BiologicalProcess-EBI-UniProt-GOA_27.02.2019_00h00	0.000912602	0.00100192	[5, 6, 7]	Group02	6.81818
GO:0032989	cellular component morphogenesis	GO_BiologicalProcess-EBI-UniProt-GOA_27.02.2019_00h00	3.35457e-12	1.68678e-11	[3, 4]	Group611	4.00562	[3			GO:0071276	cellular response to cadmium ion	GO_BiologicalProcess-EBI-UniProt-GOA_27.02.2019_00h00	0.000912602	0.00100192	[6]	Group26	6.81818
GO:0048729	tissue morphogenesis	GO_BiologicalProcess-EBI-UniProt-GOA_27.02.2019_00h00	3.04991e-11	1.37375e-10	[3, 4]	Group396	4.86618	[3			GO:1904063	negative regulation of cation transmembrane transport	GO_BiologicalProcess-EBI-UniProt-GOA_27.02.2019_00h00	0.000935919	0.00102317	[5, 6, 7, 8]	Group04	4
GO:0060341	regulation of cellular localization	GO_BiologicalProcess-EBI-UniProt-GOA_27.02.2019_00h00	3.96459e-11	1.75121e-10	[3, 4]	Group473	4.21793	[3			GO:0048011	neurotrophin TRK receptor signaling pathway	GO_BiologicalProcess-EBI-UniProt-GOA_27.02.2019_00h00	0.00110692	0.00119994	[5, 6, 7, 8]	Group01	6.38298
GO:0001558	regulation of cell growth	GO_BiologicalProcess-EBI-UniProt-GOA_27.02.2019_00h00	1.2931e-10	5.42696e-10	[3, 4, 5]	Group087	5.70902	[3			GO:0043516	regulation of DNA damage response, signal transduction by p53 class mediator	GO_BiologicalProcess-EBI-UniProt-GOA_27.02.2019_00h00	0.00117705	0.00127062	[5, 6, 7, 8]	Group17	6.25
GO:0045137	development of primary sexual characteristics	GO_BiologicalProcess-EBI-UniProt-GOA_27.02.2019_00h00	1.73437e-10	7.16605e-10	[3, 4, 5]	Group174	7.91367	[3			GO:0010907	positive regulation of glucose metabolic process	GO_BiologicalProcess-EBI-UniProt-GOA_27.02.2019_00h00	0.00117705	0.00127062	[4, 5, 6, 7, 8]	Group31	6.25
GO:0048598	embryonic morphogenesis	GO_BiologicalProcess-EBI-UniProt-GOA_27.02.2019_00h00	8.68875e-10	3.22351e-09	[3, 4, 5]	Group364	4.79452	[3			GO:0032885	regulation of polysaccharide biosynthetic process	GO_BiologicalProcess-EBI-UniProt-GOA_27.02.2019_00h00	0.00140403	0.00149685	[5, 6, 7]	Group16	5.88235
GO:0002088	lens development in camera-type eye	GO_BiologicalProcess-EBI-UniProt-GOA_27.02.2019_00h00	1.39765e-09	5.05622e-09	[3, 7, 8, 9]	Group126	13.6842	[3			GO:0003197	endocardial cushion development	GO_BiologicalProcess-EBI-UniProt-GOA_27.02.2019_00h00	0.00140403	0.00149685	[5, 6, 7]	Group76	5.88235
GO:0003179	heart valve morphogenesis	GO_BiologicalProcess-EBI-UniProt-GOA_27.02.2019_00h00	1.83227e-09	6.48184e-09	[3, 4, 6, 7, 8]	Group383	17.4603	[3			GO:1903580	positive regulation of ATP metabolic process	GO_BiologicalProcess-EBI-UniProt-GOA_27.02.2019_00h00	0.00148535	0.00157704	[5, 6, 7, 8, 9, 10, 11, 12]	Group57	5.76923
GO:0051090	regulation of DNA-binding transcription factor activity	GO_BiologicalProcess-EBI-UniProt-GOA_27.02.2019_00h00	2.1089e-09	7.3148e-09	[3, 6, 7, 8, 9, 10, 11, 12]	Group491	5.22648	[3			GO:0070884	regulation of calcineurin-NFAT signaling cascade	GO_BiologicalProcess-EBI-UniProt-GOA_27.02.2019_00h00	0.00156958	0.00165964	[7, 8, 9, 10]	Group16	5.66038
GO:0007565	female pregnancy	GO_BiologicalProcess-EBI-UniProt-GOA_27.02.2019_00h00	9.04245e-09	2.86882e-08	[3, 4]	Group186	7.42188	[3			GO:0045668	negative regulation of osteoblast differentiation	GO_BiologicalProcess-EBI-UniProt-GOA_27.02.2019_00h00	0.00156958	0.00165964	[4, 5, 6]	Group54	5.66038
GO:0062012	regulation of small molecule metabolic process	GO_BiologicalProcess-EBI-UniProt-GOA_27.02.2019_00h00	1.49782e-08	4.64151e-08	[3, 4]	Group329	4.9236	[3			GO:0060412	ventricular septum morphogenesis	GO_BiologicalProcess-EBI-UniProt-GOA_27.02.2019_00h00	0.00156958	0.00165964	[4, 5, 6, 7, 8, 9, 10]	Group76	5.66038
GO:0031334	positive regulation of protein complex assembly	GO_BiologicalProcess-EBI-UniProt-GOA_27.02.2019_00h00	1.53294e-08	4.73198e-08	[3, 4, 5, 6]	Group620	6.50155	[3			GO:0034198	cellular response to amino acid starvation	GO_BiologicalProcess-EBI-UniProt-GOA_27.02.2019_00h00	0.00203549	0.00211757	[5, 6, 7]	Group09	5.17241
GO:0060043	regulation of cardiac muscle cell proliferation	GO_BiologicalProcess-EBI-UniProt-GOA_27.02.2019_00h00	2.25531e-08	6.71554e-08	[3, 4, 5, 6, 7, 8, 9, 10, 11]	Group337	16.129	[3			GO:0010559	regulation of glycoprotein biosynthetic process	GO_BiologicalProcess-EBI-UniProt-GOA_27.02.2019_00h00	0.00213788	0.00221515	[5, 6, 7]	Group00	5.08475
GO:0048660	regulation of smooth muscle cell proliferation	GO_BiologicalProcess-EBI-UniProt-GOA_27.02.2019_00h00	4.76907e-08	1.32391e-07	[3, 4, 5]	Group178	8.62069	[3			GO:0072132	mesenchyme morphogenesis	GO_BiologicalProcess-EBI-UniProt-GOA_27.02.2019_00h00	0.00213788	0.00221515	[4, 5, 6, 7]	Group25	5.08475
GO:0048588	developmental cell growth	GO_BiologicalProcess-EBI-UniProt-GOA_27.02.2019_00h00	8.76271e-08	2.31596e-07	[3, 4, 5]	Group387	6.44068	[3			GO:0032374	regulation of cholesterol transport	GO_BiologicalProcess-EBI-UniProt-GOA_27.02.2019_00h00	0.00235213	0.00241772	[6, 7, 8]	Group11	4.91803
GO:0043502	regulation of muscle adaptation	GO_BiologicalProcess-EBI-UniProt-GOA_27.02.2019_00h00	1.94397e-07	4.90286e-07	[3, 4, 5, 6]	Group360	10.084	[3			GO:1905207	regulation of cardiocyte differentiation	GO_BiologicalProcess-EBI-UniProt-GOA_27.02.2019_00h00	0.00269769	0.00276192	[4, 5, 6, 7, 8]	Group50	4.6875
GO:0002260	lymphocyte homeostasis	GO_BiologicalProcess-EBI-UniProt-GOA_27.02.2019_00h00	2.73454e-07	6.73734e-07	[3, 6]	Group152	12.5	[3			GO:0042059	negative regulation of epidermal growth factor receptor signaling pathway	GO_BiologicalProcess-EBI-UniProt-GOA_27.02.2019_00h00	0.00320488	0.00325535	[5, 6, 7, 8, 9, 10, 11]	Group77	4.41176
GO:0048145	regulation of fibroblast proliferation	GO_BiologicalProcess-EBI-UniProt-GOA_27.02.2019_00h00	3.05606e-07	7.44914e-07	[3, 4, 5]	Group080	9.67742	[3			GO:0030071	regulation of mitotic metaphase/anaphase transition	GO_BiologicalProcess-EBI-UniProt-GOA_27.02.2019_00h00	0.00362115	0.00364944	[6, 7, 8, 9, 10, 11]	Group18	4.22535
GO:0072006	nephron development	GO_BiologicalProcess-EBI-UniProt-GOA_27.02.2019_00h00	3.88739e-07	9.23617e-07	[3, 5, 6, 7, 8]	Group513	7.9096	[3
GO:0070849	response to epidermal growth factor	GO_BiologicalProcess-EBI-UniProt-GOA_27.02.2019_00h00	4.35394e-07	1.02533e-06	[3, 5]	Group183	11.9048	[3
GO:0007584	response to nutrient	GO_BiologicalProcess-EBI-UniProt-GOA_27.02.2019_00h00	4.72795e-07	1.10043e-06	[3, 5]	Group049	5.77508	[3
GO:2000136	regulation of cell proliferation involved in heart morphogenesis	GO_BiologicalProcess-EBI-UniProt-GOA_27.02.2019_00h00	5.93392e-07	1.35354e-06	[3, 4, 5, 6, 7, 8, 9]	Group367	27.2727	[3
GO:0032535	regulation of cellular component size	GO_BiologicalProcess-EBI-UniProt-GOA_27.02.2019_00h00	1.33074e-06	2.83715e-06	[3, 4]	Group512	4.80349	[3
GO:0048469	cell maturation	GO_BiologicalProcess-EBI-UniProt-GOA_27.02.2019_00h00	4.21282e-06	8.29594e-06	[3, 4, 5]	Group215	6.07287	[3
GO:0002685	regulation of leukocyte migration	GO_BiologicalProcess-EBI-UniProt-GOA_27.02.2019_00h00	6.8151e-06	1.29422e-05	[3, 4, 5, 6, 7]	Group237	5.83658	[3
GO:0043414	macromolecule methylation	GO_BiologicalProcess-EBI-UniProt-GOA_27.02.2019_00h00	1.08542e-05	1.99493e-05	[3, 4, 5]	Group075	4.85175	[3
GO:0098813	nuclear chromosome segregation	GO_BiologicalProcess-EBI-UniProt-GOA_27.02.2019_00h00	1.11191e-05	2.03659e-05	[3, 4]	Group079	5.05952	[3
GO:0030522	intracellular receptor signaling pathway	GO_BiologicalProcess-EBI-UniProt-GOA_27.02.2019_00h00	2.50783e-05	4.30722e-05	[3, 4, 5]	Group380	4.55696	[3
GO:0002687	positive regulation of leukocyte migration	GO_BiologicalProcess-EBI-UniProt-GOA_27.02.2019_00h00	2.61056e-05	4.46925e-05	[3, 4, 5, 6, 7, 8]	Group153	6.875	[3
GO:0001659	temperature homeostasis	GO_BiologicalProcess-EBI-UniProt-GOA_27.02.2019_00h00	2.70633e-05	4.61837e-05	[3, 5]	Group318	5.85586	[3
GO:0031668	cellular response to extracellular stimulus	GO_BiologicalProcess-EBI-UniProt-GOA_27.02.2019_00h00	3.4317e-05	5.70405e-05	[3, 4]	Group130	4.63215	[3
GO:0060135	maternal process involved in female pregnancy	GO_BiologicalProcess-EBI-UniProt-GOA_27.02.2019_00h00	5.93784e-05	9.4662e-05	[3, 4, 5]	Group074	8.79121	[3
GO:0009408	response to heat	GO_BiologicalProcess-EBI-UniProt-GOA_27.02.2019_00h00	6.31975e-05	9.99533e-05	[3, 4]	Group167	5.39419	[3
GO:0043270	positive regulation of ion transport	GO_BiologicalProcess-EBI-UniProt-GOA_27.02.2019_00h00	6.58564e-05	0.000103748	[3, 4, 5, 6]	Group235	4.58453	[3
GO:0045913	positive regulation of carbohydrate metabolic process	GO_BiologicalProcess-EBI-UniProt-GOA_27.02.2019_00h00	9.35776e-05	0.000142777	[3, 4, 5, 6]	Group674	8.24742	[3
GO:0003151	outflow tract morphogenesis	GO_BiologicalProcess-EBI-UniProt-GOA_27.02.2019_00h00	0.000116	0.000173349	[3, 4, 5, 6, 7, 8]	Group486	8	[3
GO:0008354	germ cell migration	GO_BiologicalProcess-EBI-UniProt-GOA_27.02.2019_00h00	0.000119839	0.000178254	[3, 4, 5, 6]	Group326	22.2222	[3
GO:0045023	G0 to G1 transition	GO_BiologicalProcess-EBI-UniProt-GOA_27.02.2019_00h00	0.000139488	0.000205758	[3, 4]	Group157	9.09091	[3
GO:0062013	positive regulation of small molecule metabolic process	GO_BiologicalProcess-EBI-UniProt-GOA_27.02.2019_00h00	0.000142393	0.000209655	[3, 4, 5]	Group554	5.69948	[3
GO:0060395	SMAD protein signal transduction	GO_BiologicalProcess-EBI-UniProt-GOA_27.02.2019_00h00	0.000142687	0.000209895	[3, 4, 5, 6, 7, 8]	Group145	7.76699	[3
GO:2000138	positive regulation of cell proliferation involved in heart morphogenesis	GO_BiologicalProcess-EBI-UniProt-GOA_27.02.2019_00h00	0.000167629	0.000243893	[3, 4, 5, 6, 7, 8, 9, 10]	Group549	37.5	[3
GO:0034764	positive regulation of transmembrane transport	GO_BiologicalProcess-EBI-UniProt-GOA_27.02.2019_00h00	0.000169803	0.000246607	[3, 4, 5, 6]	Group169	4.88722	[3
GO:0072091	regulation of stem cell proliferation	GO_BiologicalProcess-EBI-UniProt-GOA_27.02.2019_00h00	0.000177477	0.000257052	[3, 4, 5]	Group579	8.75	[3
GO:1902115	regulation of organelle assembly	GO_BiologicalProcess-EBI-UniProt-GOA_27.02.2019_00h00	0.000182765	0.000263756	[3, 4, 5, 6]	Group059	4.85075	[3
GO:0070168	negative regulation of biomineral tissue development	GO_BiologicalProcess-EBI-UniProt-GOA_27.02.2019_00h00	0.000198396	0.00028426	[3, 4, 5, 6, 7, 8]	Group057	13.5135	[3
GO:0003279	cardiac septum development	GO_BiologicalProcess-EBI-UniProt-GOA_27.02.2019_00h00	0.000199465	0.000285537	[3, 4, 6, 7, 8]	Group565	6.56934	[3
GO:0110111	negative regulation of animal organ morphogenesis	GO_BiologicalProcess-EBI-UniProt-GOA_27.02.2019_00h00	0.000225727	0.000321691	[3, 4, 5, 6, 7, 8]	Group117	13.1579	[3
GO:0050680	negative regulation of epithelial cell proliferation	GO_BiologicalProcess-EBI-UniProt-GOA_27.02.2019_00h00	0.000253869	0.000357338	[3, 4, 5, 6]	Group052	5.78035	[3
GO:1905332	positive regulation of morphogenesis of an epithelium	GO_BiologicalProcess-EBI-UniProt-GOA_27.02.2019_00h00	0.000288888	0.00040273	[3, 4, 5, 6, 7]	Group286	12.5	[3
GO:0010633	negative regulation of epithelial cell migration	GO_BiologicalProcess-EBI-UniProt-GOA_27.02.2019_00h00	0.000320937	0.000443926	[3, 4, 5, 6, 7, 8]	Group294	7.95455	[3
GO:0008608	attachment of spindle microtubules to kinetochore	GO_BiologicalProcess-EBI-UniProt-GOA_27.02.2019_00h00	0.000364614	0.000498732	[3, 4, 5]	Group148	11.9048	[3
GO:0048640	negative regulation of developmental growth	GO_BiologicalProcess-EBI-UniProt-GOA_27.02.2019_00h00	0.000372532	0.000508692	[3, 4, 5]	Group270	6.04027	[3
GO:0030279	negative regulation of ossification	GO_BiologicalProcess-EBI-UniProt-GOA_27.02.2019_00h00	0.000394152	0.000536383	[3, 4, 5]	Group076	7.69231	[3
GO:0060749	mammary gland alveolus development	GO_BiologicalProcess-EBI-UniProt-GOA_27.02.2019_00h00	0.000456773	0.000613765	[3, 4, 7, 8, 9]	Group084	16	[3
GO:0030968	endoplasmic reticulum unfolded protein response	GO_BiologicalProcess-EBI-UniProt-GOA_27.02.2019_00h00	0.000597869	0.000787474	[3, 4, 5, 6, 7]	Group266	5.66038	[3
GO:0030220	platelet formation	GO_BiologicalProcess-EBI-UniProt-GOA_27.02.2019_00h00	0.000714094	0.000928322	[3, 4, 5, 6, 7, 8, 9]	Group392	14.2857	[3
GO:0060324	face development	GO_BiologicalProcess-EBI-UniProt-GOA_27.02.2019_00h00	0.00107821	0.00136721	[3, 4]	Group045	9.43396	[3
GO:0035019	somatic stem cell population maintenance	GO_BiologicalProcess-EBI-UniProt-GOA_27.02.2019_00h00	0.00191329	0.00231069	[3, 4]	Group166	6.81818	[3
GO:0061037	negative regulation of cartilage development	GO_BiologicalProcess-EBI-UniProt-GOA_27.02.2019_00h00	0.0020762	0.00249612	[3, 4, 5, 6, 7, 8]	Group419	10.8108	[3
GO:0040018	positive regulation of multicellular organism growth	GO_BiologicalProcess-EBI-UniProt-GOA_27.02.2019_00h00	0.00252682	0.00300178	[3, 4, 5, 6]	Group069	10.2564	[3
GO:0060742	epithelial cell differentiation involved in prostate gland development	GO_BiologicalProcess-EBI-UniProt-GOA_27.02.2019_00h00	0.00299358	0.00351966	[3, 4, 5, 6, 7, 8]	Group288	15	[3
GO:0033598	mammary gland epithelial cell proliferation	GO_BiologicalProcess-EBI-UniProt-GOA_27.02.2019_00h00	0.00304039	0.00356945	[3, 6, 7, 8, 9]	Group161	9.7561	[3
GO:0045778	positive regulation of ossification	GO_BiologicalProcess-EBI-UniProt-GOA_27.02.2019_00h00	0.00483828	0.00550634	[3, 4, 5]	Group547	5.66038	[3
GO:0032370	positive regulation of lipid transport	GO_BiologicalProcess-EBI-UniProt-GOA_27.02.2019_00h00	0.00557946	0.00628722	[3, 4, 5, 6, 7]	Group652	6.49351	[3
GO:0071425	hematopoietic stem cell proliferation	GO_BiologicalProcess-EBI-UniProt-GOA_27.02.2019_00h00	0.00711979	0.00790045	[3, 5, 6, 7, 8]	Group022	11.1111	[3
GO:0060325	face morphogenesis	GO_BiologicalProcess-EBI-UniProt-GOA_27.02.2019_00h00	0.0124485	0.0133861	[3, 4, 5, 6]	Group124	9.09091	[3
GO:1901976	regulation of cell cycle checkpoint	GO_BiologicalProcess-EBI-UniProt-GOA_27.02.2019_00h00	0.0209113	0.021926	[3, 4, 5, 6, 7]	Group024	7.5	[3
GO:0001825	blastocyst formation	GO_BiologicalProcess-EBI-UniProt-GOA_27.02.2019_00h00	0.0336134	0.0345423	[3, 4, 5, 8, 9]	Group015	6.25	[3
GO:0048286	lung alveolus development	GO_BiologicalProcess-EBI-UniProt-GOA_27.02.2019_00h00	0.0354271	0.0363361	[3, 5, 6, 7, 8]	Group001	6.12245	[3
GO:0070887	cellular response to chemical stimulus	GO_BiologicalProcess-EBI-UniProt-GOA_27.02.2019_00h00	3.30917e-41	5.29136e-38	[3]	Group397	4.08884	[3]
GO:0033554	cellular response to stress	GO_BiologicalProcess-EBI-UniProt-GOA_27.02.2019_00h00	1.2371e-26	5.99432e-25	[3]	Group113	4.27954	[3]
GO:0009888	tissue development	GO_BiologicalProcess-EBI-UniProt-GOA_27.02.2019_00h00	4.64804e-26	2.0645e-24	[3]	Group176	4.31245	[3]
GO:0061061	muscle structure development	GO_BiologicalProcess-EBI-UniProt-GOA_27.02.2019_00h00	7.5639e-23	1.86072e-21	[3]	Group678	6.90909	[3]
GO:1901700	response to oxygen-containing compound	GO_BiologicalProcess-EBI-UniProt-GOA_27.02.2019_00h00	4.48216e-21	7.96331e-20	[3]	Group410	4.26245	[3]
GO:0070482	response to oxygen levels	GO_BiologicalProcess-EBI-UniProt-GOA_27.02.2019_00h00	1.48743e-19	2.06817e-18	[3]	Group160	8.15534	[3]
GO:0000278	mitotic cell cycle	GO_BiologicalProcess-EBI-UniProt-GOA_27.02.2019_00h00	2.6602e-17	2.62572e-16	[3]	Group682	4.83871	[3]
GO:0009314	response to radiation	GO_BiologicalProcess-EBI-UniProt-GOA_27.02.2019_00h00	1.6889e-16	1.42134e-15	[3]	Group440	6.89076	[3]
GO:0042493	response to drug	GO_BiologicalProcess-EBI-UniProt-GOA_27.02.2019_00h00	6.40289e-15	4.49045e-14	[3]	Group239	4.41709	[3]
GO:0044403	symbiont process	GO_BiologicalProcess-EBI-UniProt-GOA_27.02.2019_00h00	5.66421e-12	2.77824e-11	[3]	Group053	4.329	[3]
GO:0009636	response to toxic substance	GO_BiologicalProcess-EBI-UniProt-GOA_27.02.2019_00h00	9.01608e-11	3.83423e-10	[3]	Group190	5.09915	[3]
GO:0051098	regulation of binding	GO_BiologicalProcess-EBI-UniProt-GOA_27.02.2019_00h00	4.41862e-09	1.45079e-08	[3]	Group265	5.52147	[3]
GO:0031647	regulation of protein stability	GO_BiologicalProcess-EBI-UniProt-GOA_27.02.2019_00h00	2.57254e-08	7.56156e-08	[3]	Group054	6.04396	[3]
GO:0009991	response to extracellular stimulus	GO_BiologicalProcess-EBI-UniProt-GOA_27.02.2019_00h00	3.53436e-08	1.0056e-07	[3]	Group119	4.40771	[3]
GO:0031099	regeneration	GO_BiologicalProcess-EBI-UniProt-GOA_27.02.2019_00h00	8.68557e-08	2.30319e-07	[3]	Group264	6.79245	[3]
GO:0009266	response to temperature stimulus	GO_BiologicalProcess-EBI-UniProt-GOA_27.02.2019_00h00	1.26927e-06	2.71332e-06	[3]	Group041	5.66038	[3]
GO:0006970	response to osmotic stress	GO_BiologicalProcess-EBI-UniProt-GOA_27.02.2019_00h00	3.65141e-05	6.05665e-05	[3]	Group111	8.18182	[3]
GO:0035821	modification of morphology or physiology of other organism	GO_BiologicalProcess-EBI-UniProt-GOA_27.02.2019_00h00	0.000151797	0.000221867	[3]	Group591	5.26316	[3]
GO:1904888	cranial skeletal system development	GO_BiologicalProcess-EBI-UniProt-GOA_27.02.2019_00h00	0.000163985	0.000238809	[3]	Group600	8.86076	[3]
GO:0046849	bone remodeling	GO_BiologicalProcess-EBI-UniProt-GOA_27.02.2019_00h00	0.001505	0.00185686	[3]	Group257	6.14035	[3]
GO:0007167	enzyme linked receptor protein signaling pathway	GO_BiologicalProcess-EBI-UniProt-GOA_27.02.2019_00h00	1.00997e-28	7.02148e-27	[4, 5, 6]	Group462	6.09756	[4
GO:0051247	positive regulation of protein metabolic process	GO_BiologicalProcess-EBI-UniProt-GOA_27.02.2019_00h00	1.43748e-25	5.47268e-24	[4, 5, 6]	Group608	4.58629	[4
GO:1902531	regulation of intracellular signal transduction	GO_BiologicalProcess-EBI-UniProt-GOA_27.02.2019_00h00	5.32158e-24	1.73657e-22	[4, 5, 6]	Group681	4.29874	[4
GO:0030099	myeloid cell differentiation	GO_BiologicalProcess-EBI-UniProt-GOA_27.02.2019_00h00	7.00713e-19	8.89239e-18	[4, 5, 6, 7, 8]	Group526	7.82123	[4
GO:0000165	MAPK cascade	GO_BiologicalProcess-EBI-UniProt-GOA_27.02.2019_00h00	1.98316e-18	2.33167e-17	[4, 5, 6, 8, 9]	Group472	5.10121	[4
GO:0071417	cellular response to organonitrogen compound	GO_BiologicalProcess-EBI-UniProt-GOA_27.02.2019_00h00	4.19839e-18	4.53596e-17	[4, 5]	Group415	6.469	[4
GO:0007507	heart development	GO_BiologicalProcess-EBI-UniProt-GOA_27.02.2019_00h00	5.8045e-18	6.14662e-17	[4, 5, 6]	Group487	6.41711	[4
GO:0048514	blood vessel morphogenesis	GO_BiologicalProcess-EBI-UniProt-GOA_27.02.2019_00h00	2.91113e-17	2.82115e-16	[4, 5, 6, 7, 8, 9]	Group252	6.29183	[4
GO:1902533	positive regulation of intracellular signal transduction	GO_BiologicalProcess-EBI-UniProt-GOA_27.02.2019_00h00	4.15407e-17	3.86183e-16	[4, 5, 6, 7]	Group594	4.79452	[4
GO:0002521	leukocyte differentiation	GO_BiologicalProcess-EBI-UniProt-GOA_27.02.2019_00h00	6.64017e-17	5.83386e-16	[4, 5, 6, 7, 8]	Group175	6.57698	[4
GO:0060284	regulation of cell development	GO_BiologicalProcess-EBI-UniProt-GOA_27.02.2019_00h00	6.94733e-17	6.07037e-16	[4, 5]	Group528	5.00849	[4
GO:0045934	negative regulation of nucleobase-containing compound metabolic process	GO_BiologicalProcess-EBI-UniProt-GOA_27.02.2019_00h00	1.63351e-16	1.382e-15	[4, 5, 6]	Group511	4.04255	[4
GO:0043434	response to peptide hormone	GO_BiologicalProcess-EBI-UniProt-GOA_27.02.2019_00h00	1.11289e-15	8.72311e-15	[4, 5, 6]	Group324	6.8662	[4
GO:0010638	positive regulation of organelle organization	GO_BiologicalProcess-EBI-UniProt-GOA_27.02.2019_00h00	1.24951e-14	8.1884e-14	[4, 5, 6]	Group256	5.46968	[4
GO:2000377	regulation of reactive oxygen species metabolic process	GO_BiologicalProcess-EBI-UniProt-GOA_27.02.2019_00h00	7.59154e-13	4.17143e-12	[4, 5]	Group151	9.82906	[4
GO:0019221	cytokine-mediated signaling pathway	GO_BiologicalProcess-EBI-UniProt-GOA_27.02.2019_00h00	5.61649e-12	2.76331e-11	[4, 5, 6]	Group116	4.6046	[4
GO:0048732	gland development	GO_BiologicalProcess-EBI-UniProt-GOA_27.02.2019_00h00	5.96562e-12	2.90824e-11	[4, 5, 6]	Group135	5.75658	[4
GO:0060420	regulation of heart growth	GO_BiologicalProcess-EBI-UniProt-GOA_27.02.2019_00h00	1.04645e-11	4.95051e-11	[4, 5, 6, 7, 8]	Group561	15.625	[4
GO:0071156	regulation of cell cycle arrest	GO_BiologicalProcess-EBI-UniProt-GOA_27.02.2019_00h00	2.13657e-11	9.73325e-11	[4, 5, 6, 7]	Group196	11.3924	[4
GO:0031098	stress-activated protein kinase signaling cascade	GO_BiologicalProcess-EBI-UniProt-GOA_27.02.2019_00h00	3.43459e-11	1.52978e-10	[4, 5, 6]	Group247	6.63507	[4
GO:2000027	regulation of animal organ morphogenesis	GO_BiologicalProcess-EBI-UniProt-GOA_27.02.2019_00h00	5.15025e-11	2.25623e-10	[4, 5, 6, 7]	Group606	7.64331	[4
GO:0051147	regulation of muscle cell differentiation	GO_BiologicalProcess-EBI-UniProt-GOA_27.02.2019_00h00	1.30959e-10	5.48177e-10	[4, 5]	Group191	9.54774	[4
GO:0002009	morphogenesis of an epithelium	GO_BiologicalProcess-EBI-UniProt-GOA_27.02.2019_00h00	2.13073e-10	8.736e-10	[4, 5]	Group587	5.17504	[4
GO:0010720	positive regulation of cell development	GO_BiologicalProcess-EBI-UniProt-GOA_27.02.2019_00h00	4.32466e-10	1.72447e-09	[4, 5, 6]	Group534	4.92264	[4
GO:0060485	mesenchyme development	GO_BiologicalProcess-EBI-UniProt-GOA_27.02.2019_00h00	5.04968e-10	1.99369e-09	[4, 5, 6]	Group506	6.83761	[4
GO:0097193	intrinsic apoptotic signaling pathway	GO_BiologicalProcess-EBI-UniProt-GOA_27.02.2019_00h00	7.89307e-10	2.97666e-09	[4, 5, 6]	Group123	6.42674	[4
GO:0060562	epithelial tube morphogenesis	GO_BiologicalProcess-EBI-UniProt-GOA_27.02.2019_00h00	1.33148e-09	4.83871e-09	[4, 5, 6]	Group358	6.26566	[4
GO:0043491	protein kinase B signaling	GO_BiologicalProcess-EBI-UniProt-GOA_27.02.2019_00h00	1.44538e-09	5.20533e-09	[4, 5, 6]	Group637	6.76471	[4
GO:0007264	small GTPase mediated signal transduction	GO_BiologicalProcess-EBI-UniProt-GOA_27.02.2019_00h00	2.04507e-09	7.10885e-09	[4, 5, 6]	Group651	4.74198	[4
GO:0045931	positive regulation of mitotic cell cycle	GO_BiologicalProcess-EBI-UniProt-GOA_27.02.2019_00h00	3.14498e-09	1.06318e-08	[4, 5, 6]	Group407	8.41121	[4
GO:0097191	extrinsic apoptotic signaling pathway	GO_BiologicalProcess-EBI-UniProt-GOA_27.02.2019_00h00	3.49562e-09	1.17426e-08	[4, 5, 6]	Group122	7.07071	[4
GO:0071478	cellular response to radiation	GO_BiologicalProcess-EBI-UniProt-GOA_27.02.2019_00h00	3.76715e-09	1.26018e-08	[4, 5]	Group311	7.40741	[4
GO:0060421	positive regulation of heart growth	GO_BiologicalProcess-EBI-UniProt-GOA_27.02.2019_00h00	3.77852e-09	1.26135e-08	[4, 5, 6, 7, 8, 9]	Group444	19.2308	[4
GO:0071158	positive regulation of cell cycle arrest	GO_BiologicalProcess-EBI-UniProt-GOA_27.02.2019_00h00	5.22713e-09	1.70575e-08	[4, 5, 6, 7, 8]	Group331	11.1111	[4
GO:0043200	response to amino acid	GO_BiologicalProcess-EBI-UniProt-GOA_27.02.2019_00h00	1.55361e-08	4.76819e-08	[4, 5]	Group170	10.219	[4
GO:0048545	response to steroid hormone	GO_BiologicalProcess-EBI-UniProt-GOA_27.02.2019_00h00	2.62406e-08	7.69884e-08	[4, 5]	Group371	4.92958	[4
GO:0007088	regulation of mitotic nuclear division	GO_BiologicalProcess-EBI-UniProt-GOA_27.02.2019_00h00	3.8035e-08	1.07642e-07	[4, 5, 6, 7]	Group515	7.17131	[4
GO:0006109	regulation of carbohydrate metabolic process	GO_BiologicalProcess-EBI-UniProt-GOA_27.02.2019_00h00	7.74564e-08	2.07458e-07	[4, 5]	Group686	6.84411	[4
GO:1902107	positive regulation of leukocyte differentiation	GO_BiologicalProcess-EBI-UniProt-GOA_27.02.2019_00h00	1.0007e-07	2.62745e-07	[4, 5, 6, 7, 8, 9, 10]	Group568	8.15217	[4
GO:0031032	actomyosin structure organization	GO_BiologicalProcess-EBI-UniProt-GOA_27.02.2019_00h00	1.75127e-07	4.45904e-07	[4, 6]	Group173	6.85484	[4
GO:0090101	negative regulation of transmembrane receptor protein serine/threonine kinase signaling pathway	GO_BiologicalProcess-EBI-UniProt-GOA_27.02.2019_00h00	3.29517e-07	7.97123e-07	[4, 5, 6, 7, 8, 9]	Group574	8.72483	[4
GO:0030857	negative regulation of epithelial cell differentiation	GO_BiologicalProcess-EBI-UniProt-GOA_27.02.2019_00h00	3.40343e-07	8.20828e-07	[4, 5, 6, 7]	Group193	14.2857	[4
GO:0001822	kidney development	GO_BiologicalProcess-EBI-UniProt-GOA_27.02.2019_00h00	3.80543e-07	9.08192e-07	[4, 5, 6, 7]	Group664	5.60224	[4
GO:0034248	regulation of cellular amide metabolic process	GO_BiologicalProcess-EBI-UniProt-GOA_27.02.2019_00h00	4.79923e-07	1.1154e-06	[4, 5]	Group648	4.50607	[4
GO:0006809	nitric oxide biosynthetic process	GO_BiologicalProcess-EBI-UniProt-GOA_27.02.2019_00h00	6.0684e-07	1.38225e-06	[4, 5, 6]	Group141	11.4943	[4
GO:0007219	Notch signaling pathway	GO_BiologicalProcess-EBI-UniProt-GOA_27.02.2019_00h00	1.78083e-06	3.72228e-06	[4, 5, 6]	Group194	6.13027	[4
GO:0060425	lung morphogenesis	GO_BiologicalProcess-EBI-UniProt-GOA_27.02.2019_00h00	2.32706e-06	4.80126e-06	[4, 5, 6, 7, 8]	Group149	13.5593	[4
GO:0030258	lipid modification	GO_BiologicalProcess-EBI-UniProt-GOA_27.02.2019_00h00	2.71899e-06	5.53843e-06	[4, 5]	Group258	5.13514	[4
GO:0003250	regulation of cell proliferation involved in heart valve morphogenesis	GO_BiologicalProcess-EBI-UniProt-GOA_27.02.2019_00h00	3.1623e-06	6.38448e-06	[4, 5, 6, 7, 8, 9, 10]	Group497	100	[4
GO:0090596	sensory organ morphogenesis	GO_BiologicalProcess-EBI-UniProt-GOA_27.02.2019_00h00	4.01589e-06	7.93747e-06	[4, 5, 6, 7]	Group589	5.46624	[4
GO:0003007	heart morphogenesis	GO_BiologicalProcess-EBI-UniProt-GOA_27.02.2019_00h00	5.62869e-06	1.08699e-05	[4, 5, 6, 7]	Group559	5.32915	[4
GO:0002040	sprouting angiogenesis	GO_BiologicalProcess-EBI-UniProt-GOA_27.02.2019_00h00	6.44371e-06	1.22807e-05	[4, 5, 6, 7, 8, 9, 10, 11]	Group104	7.97101	[4
GO:0003198	epithelial to mesenchymal transition involved in endocardial cushion formation	GO_BiologicalProcess-EBI-UniProt-GOA_27.02.2019_00h00	6.57487e-06	1.25009e-05	[4, 5, 6, 7, 8, 9, 10]	Group631	26.3158	[4
GO:0002062	chondrocyte differentiation	GO_BiologicalProcess-EBI-UniProt-GOA_27.02.2019_00h00	8.47626e-06	1.59453e-05	[4, 5, 6, 7]	Group071	7.74648	[4
GO:0090183	regulation of kidney development	GO_BiologicalProcess-EBI-UniProt-GOA_27.02.2019_00h00	8.61221e-06	1.61441e-05	[4, 5, 6, 7, 8]	Group673	11.4286	[4
GO:0055001	muscle cell development	GO_BiologicalProcess-EBI-UniProt-GOA_27.02.2019_00h00	9.02166e-06	1.68327e-05	[4, 5]	Group077	6.06061	[4
GO:0045736	negative regulation of cyclin-dependent protein serine/threonine kinase activity	GO_BiologicalProcess-EBI-UniProt-GOA_27.02.2019_00h00	1.06174e-05	1.95815e-05	[4, 5, 6, 7, 8, 9, 10, 11, 12]	Group471	13.4615	[4
GO:0006479	protein methylation	GO_BiologicalProcess-EBI-UniProt-GOA_27.02.2019_00h00	1.09625e-05	2.01252e-05	[4, 5, 6, 7, 8]	Group185	5.95745	[4
GO:1904705	regulation of vascular smooth muscle cell proliferation	GO_BiologicalProcess-EBI-UniProt-GOA_27.02.2019_00h00	1.18038e-05	2.14481e-05	[4, 5, 6]	Group171	10.9589	[4
GO:0001569	branching involved in blood vessel morphogenesis	GO_BiologicalProcess-EBI-UniProt-GOA_27.02.2019_00h00	1.30247e-05	2.35062e-05	[4, 5, 6, 7, 8, 9, 10, 11]	Group399	16.6667	[4
GO:0002688	regulation of leukocyte chemotaxis	GO_BiologicalProcess-EBI-UniProt-GOA_27.02.2019_00h00	1.61639e-05	2.85908e-05	[4, 5, 6, 7, 8]	Group464	7.23684	[4
GO:0000819	sister chromatid segregation	GO_BiologicalProcess-EBI-UniProt-GOA_27.02.2019_00h00	1.75171e-05	3.07801e-05	[4, 5]	Group208	5.71429	[4
GO:0010869	regulation of receptor biosynthetic process	GO_BiologicalProcess-EBI-UniProt-GOA_27.02.2019_00h00	1.81286e-05	3.17847e-05	[4, 5, 6, 7]	Group158	21.7391	[4
GO:0060391	positive regulation of SMAD protein signal transduction	GO_BiologicalProcess-EBI-UniProt-GOA_27.02.2019_00h00	2.07876e-05	3.61691e-05	[4, 5, 6, 7, 8, 9, 10]	Group348	33.3333	[4
GO:0051251	positive regulation of lymphocyte activation	GO_BiologicalProcess-EBI-UniProt-GOA_27.02.2019_00h00	2.5151e-05	4.31507e-05	[4, 5, 6, 7]	Group666	4.38799	[4
GO:0051250	negative regulation of lymphocyte activation	GO_BiologicalProcess-EBI-UniProt-GOA_27.02.2019_00h00	2.6283e-05	4.49482e-05	[4, 5, 6, 7]	Group182	6.31579	[4
GO:0090100	positive regulation of transmembrane receptor protein serine/threonine kinase signaling pathway	GO_BiologicalProcess-EBI-UniProt-GOA_27.02.2019_00h00	3.87882e-05	6.38746e-05	[4, 5, 6, 7, 8, 9]	Group233	7.24638	[4
GO:1900034	regulation of cellular response to heat	GO_BiologicalProcess-EBI-UniProt-GOA_27.02.2019_00h00	3.92303e-05	6.45363e-05	[4, 5, 6]	Group114	8.10811	[4
GO:0072009	nephron epithelium development	GO_BiologicalProcess-EBI-UniProt-GOA_27.02.2019_00h00	4.38642e-05	7.14245e-05	[4, 6, 7, 8, 9]	Group599	7.14286	[4
GO:0044344	cellular response to fibroblast growth factor stimulus	GO_BiologicalProcess-EBI-UniProt-GOA_27.02.2019_00h00	4.8135e-05	7.80607e-05	[4, 6]	Group439	6.43275	[4
GO:0031214	biomineral tissue development	GO_BiologicalProcess-EBI-UniProt-GOA_27.02.2019_00h00	5.0249e-05	8.10778e-05	[4, 5, 6]	Group571	5.91133	[4
GO:0043588	skin development	GO_BiologicalProcess-EBI-UniProt-GOA_27.02.2019_00h00	5.22078e-05	8.39841e-05	[4, 5, 6]	Group216	4.02414	[4
GO:0051149	positive regulation of muscle cell differentiation	GO_BiologicalProcess-EBI-UniProt-GOA_27.02.2019_00h00	5.93792e-05	9.45691e-05	[4, 5, 6]	Group451	7.69231	[4
GO:0060055	angiogenesis involved in wound healing	GO_BiologicalProcess-EBI-UniProt-GOA_27.02.2019_00h00	5.95131e-05	9.4688e-05	[4, 5, 6, 7, 8, 9, 10, 11]	Group033	17.2414	[4
GO:0072012	glomerulus vasculature development	GO_BiologicalProcess-EBI-UniProt-GOA_27.02.2019_00h00	5.95131e-05	9.4688e-05	[4, 5, 6, 7, 8, 9, 10]	Group259	17.2414	[4
GO:0060440	trachea formation	GO_BiologicalProcess-EBI-UniProt-GOA_27.02.2019_00h00	6.11952e-05	9.72675e-05	[4, 5, 6, 7, 8]	Group195	50	[4
GO:0030850	prostate gland development	GO_BiologicalProcess-EBI-UniProt-GOA_27.02.2019_00h00	6.91729e-05	0.000108652	[4, 5, 6, 7]	Group212	10.1449	[4
GO:0120032	regulation of plasma membrane bounded cell projection assembly	GO_BiologicalProcess-EBI-UniProt-GOA_27.02.2019_00h00	7.47025e-05	0.000116196	[4, 5, 6, 7]	Group097	5.30612	[4
GO:0051193	regulation of cofactor metabolic process	GO_BiologicalProcess-EBI-UniProt-GOA_27.02.2019_00h00	8.31152e-05	0.000128283	[4, 5]	Group677	6.62252	[4
GO:0055123	digestive system development	GO_BiologicalProcess-EBI-UniProt-GOA_27.02.2019_00h00	9.32495e-05	0.000142549	[4, 5]	Group225	5.97826	[4
GO:1905330	regulation of morphogenesis of an epithelium	GO_BiologicalProcess-EBI-UniProt-GOA_27.02.2019_00h00	0.000103949	0.000156511	[4, 5, 6]	Group489	5.47945	[4
GO:0060712	spongiotrophoblast layer development	GO_BiologicalProcess-EBI-UniProt-GOA_27.02.2019_00h00	0.000150043	0.000219907	[4, 5, 6, 7, 8, 9]	Group657	21.0526	[4
GO:0043255	regulation of carbohydrate biosynthetic process	GO_BiologicalProcess-EBI-UniProt-GOA_27.02.2019_00h00	0.000159457	0.00023285	[4, 5, 6]	Group343	6.76692	[4
GO:0060840	artery development	GO_BiologicalProcess-EBI-UniProt-GOA_27.02.2019_00h00	0.000174242	0.000252596	[4, 6, 7, 8, 9]	Group452	7.54717	[4
GO:0045667	regulation of osteoblast differentiation	GO_BiologicalProcess-EBI-UniProt-GOA_27.02.2019_00h00	0.00023467	0.000333248	[4, 5]	Group352	6.42857	[4
GO:0022618	ribonucleoprotein complex assembly	GO_BiologicalProcess-EBI-UniProt-GOA_27.02.2019_00h00	0.000265821	0.000372849	[4, 5, 6]	Group005	4.43038	[4
GO:0048538	thymus development	GO_BiologicalProcess-EBI-UniProt-GOA_27.02.2019_00h00	0.000272827	0.000382006	[4, 5, 6, 7]	Group229	9.83607	[4
GO:0060956	endocardial cell differentiation	GO_BiologicalProcess-EBI-UniProt-GOA_27.02.2019_00h00	0.000351421	0.000481924	[4, 6, 7, 8, 9]	Group626	30	[4
GO:0060711	labyrinthine layer development	GO_BiologicalProcess-EBI-UniProt-GOA_27.02.2019_00h00	0.000419855	0.000567976	[4, 5, 6, 7, 8, 9]	Group578	9.09091	[4
GO:0034694	response to prostaglandin	GO_BiologicalProcess-EBI-UniProt-GOA_27.02.2019_00h00	0.000505168	0.000674823	[4, 5, 6]	Group300	11.1111	[4
GO:0061213	positive regulation of mesonephros development	GO_BiologicalProcess-EBI-UniProt-GOA_27.02.2019_00h00	0.000533608	0.00070985	[4, 5, 6, 7, 8, 9, 10]	Group496	15.3846	[4
GO:0043488	regulation of mRNA stability	GO_BiologicalProcess-EBI-UniProt-GOA_27.02.2019_00h00	0.000660752	0.000863189	[4, 6, 7, 8, 9, 10]	Group219	4.7619	[4
GO:0010870	positive regulation of receptor biosynthetic process	GO_BiologicalProcess-EBI-UniProt-GOA_27.02.2019_00h00	0.000810529	0.00104603	[4, 5, 6, 7, 8]	Group060	23.0769	[4
GO:2000378	negative regulation of reactive oxygen species metabolic process	GO_BiologicalProcess-EBI-UniProt-GOA_27.02.2019_00h00	0.000893715	0.00114691	[4, 5, 6]	Group201	7.89474	[4
GO:0034249	negative regulation of cellular amide metabolic process	GO_BiologicalProcess-EBI-UniProt-GOA_27.02.2019_00h00	0.000958768	0.0012245	[4, 5, 6]	Group434	4.87805	[4
GO:0098751	bone cell development	GO_BiologicalProcess-EBI-UniProt-GOA_27.02.2019_00h00	0.00117412	0.00147828	[4, 5, 6, 7]	Group179	9.25926	[4
GO:0003208	cardiac ventricle morphogenesis	GO_BiologicalProcess-EBI-UniProt-GOA_27.02.2019_00h00	0.00267191	0.00316239	[4, 5, 6, 7, 8, 9]	Group349	6.38298	[4
GO:0002703	regulation of leukocyte mediated immunity	GO_BiologicalProcess-EBI-UniProt-GOA_27.02.2019_00h00	0.00334843	0.00389393	[4, 5]	Group136	4.11523	[4
GO:0031016	pancreas development	GO_BiologicalProcess-EBI-UniProt-GOA_27.02.2019_00h00	0.00363644	0.00421047	[4, 5, 6]	Group115	6	[4
GO:0031929	TOR signaling	GO_BiologicalProcess-EBI-UniProt-GOA_27.02.2019_00h00	0.00440294	0.00503958	[4, 5, 6]	Group231	5.07246	[4
GO:0060479	lung cell differentiation	GO_BiologicalProcess-EBI-UniProt-GOA_27.02.2019_00h00	0.00711979	0.00790045	[4, 5, 6, 7, 8]	Group310	11.1111	[4
GO:0009855	determination of bilateral symmetry	GO_BiologicalProcess-EBI-UniProt-GOA_27.02.2019_00h00	0.00739336	0.0081813	[4, 5, 6]	Group484	4.60526	[4
GO:0048701	embryonic cranial skeleton morphogenesis	GO_BiologicalProcess-EBI-UniProt-GOA_27.02.2019_00h00	0.00766235	0.00846139	[4, 6, 7, 8, 9]	Group607	7.54717	[4
GO:0036120	cellular response to platelet-derived growth factor stimulus	GO_BiologicalProcess-EBI-UniProt-GOA_27.02.2019_00h00	0.00870421	0.00953289	[4, 6]	Group017	10.3448	[4
GO:0032330	regulation of chondrocyte differentiation	GO_BiologicalProcess-EBI-UniProt-GOA_27.02.2019_00h00	0.0104866	0.0113759	[4, 5, 6, 7, 8]	Group627	6.89655	[4
GO:0071621	granulocyte chemotaxis	GO_BiologicalProcess-EBI-UniProt-GOA_27.02.2019_00h00	0.0120366	0.0129693	[4, 5, 6, 7, 8]	Group661	4.19162	[4
GO:0033574	response to testosterone	GO_BiologicalProcess-EBI-UniProt-GOA_27.02.2019_00h00	0.017968	0.0189893	[4, 5]	Group562	5.88235	[4
GO:0045879	negative regulation of smoothened signaling pathway	GO_BiologicalProcess-EBI-UniProt-GOA_27.02.2019_00h00	0.0182415	0.019253	[4, 5, 6, 7, 8]	Group221	7.89474	[4
GO:0046889	positive regulation of lipid biosynthetic process	GO_BiologicalProcess-EBI-UniProt-GOA_27.02.2019_00h00	0.0226388	0.0236289	[4, 5, 6, 7]	Group475	4.58716	[4
GO:0048644	muscle organ morphogenesis	GO_BiologicalProcess-EBI-UniProt-GOA_27.02.2019_00h00	0.0234413	0.0244346	[4, 5, 6, 7]	Group625	4.54545	[4
GO:0048668	collateral sprouting	GO_BiologicalProcess-EBI-UniProt-GOA_27.02.2019_00h00	0.0252959	0.026265	[4, 5, 6, 7, 8, 9, 10, 11, 12, 13]	Group009	6.97674	[4
GO:0044319	wound healing, spreading of cells	GO_BiologicalProcess-EBI-UniProt-GOA_27.02.2019_00h00	0.028472	0.0294671	[4, 5, 6, 8, 9]	Group402	6.66667	[4
GO:0060429	epithelium development	GO_BiologicalProcess-EBI-UniProt-GOA_27.02.2019_00h00	2.97976e-21	5.54028e-20	[4]	Group083	4.88746	[4]
GO:0051276	chromosome organization	GO_BiologicalProcess-EBI-UniProt-GOA_27.02.2019_00h00	2.63312e-19	3.5986e-18	[4]	Group163	4.73373	[4]
GO:0060537	muscle tissue development	GO_BiologicalProcess-EBI-UniProt-GOA_27.02.2019_00h00	2.18002e-17	2.17865e-16	[4]	Group142	7.50469	[4]
GO:0033993	response to lipid	GO_BiologicalProcess-EBI-UniProt-GOA_27.02.2019_00h00	9.98e-17	8.57958e-16	[4]	Group181	4.8336	[4]
GO:0048872	homeostasis of number of cells	GO_BiologicalProcess-EBI-UniProt-GOA_27.02.2019_00h00	1.2561e-16	1.06836e-15	[4]	Group292	9.2219	[4]
GO:0042692	muscle cell differentiation	GO_BiologicalProcess-EBI-UniProt-GOA_27.02.2019_00h00	2.48128e-16	2.04513e-15	[4]	Group640	7.84314	[4]
GO:0014070	response to organic cyclic compound	GO_BiologicalProcess-EBI-UniProt-GOA_27.02.2019_00h00	1.27988e-15	9.98307e-15	[4]	Group249	4.69745	[4]
GO:0010212	response to ionizing radiation	GO_BiologicalProcess-EBI-UniProt-GOA_27.02.2019_00h00	5.21987e-12	2.58408e-11	[4]	Group463	10.6952	[4]
GO:0009416	response to light stimulus	GO_BiologicalProcess-EBI-UniProt-GOA_27.02.2019_00h00	1.13092e-11	5.33434e-11	[4]	Group365	6.71296	[4]
GO:0010038	response to metal ion	GO_BiologicalProcess-EBI-UniProt-GOA_27.02.2019_00h00	1.71401e-11	7.96714e-11	[4]	Group246	6.18762	[4]
GO:0061448	connective tissue development	GO_BiologicalProcess-EBI-UniProt-GOA_27.02.2019_00h00	1.84057e-10	7.58524e-10	[4]	Group338	7.18563	[4]
GO:0035690	cellular response to drug	GO_BiologicalProcess-EBI-UniProt-GOA_27.02.2019_00h00	2.66384e-09	9.14053e-09	[4]	Group150	5.47945	[4]
GO:0009743	response to carbohydrate	GO_BiologicalProcess-EBI-UniProt-GOA_27.02.2019_00h00	3.9392e-09	1.30952e-08	[4]	Group197	7.02341	[4]
GO:0000302	response to reactive oxygen species	GO_BiologicalProcess-EBI-UniProt-GOA_27.02.2019_00h00	1.40194e-07	3.60403e-07	[4]	Group437	6.25	[4]
GO:0007498	mesoderm development	GO_BiologicalProcess-EBI-UniProt-GOA_27.02.2019_00h00	1.13675e-06	2.4563e-06	[4]	Group227	7.83133	[4]
GO:0007492	endoderm development	GO_BiologicalProcess-EBI-UniProt-GOA_27.02.2019_00h00	6.54313e-06	1.24553e-05	[4]	Group426	10.1124	[4]
GO:0071824	protein-DNA complex subunit organization	GO_BiologicalProcess-EBI-UniProt-GOA_27.02.2019_00h00	1.29622e-05	2.34199e-05	[4]	Group217	5	[4]
GO:0042908	xenobiotic transport	GO_BiologicalProcess-EBI-UniProt-GOA_27.02.2019_00h00	5.53555e-05	8.86908e-05	[4]	Group205	26.6667	[4]
GO:0090136	epithelial cell-cell adhesion	GO_BiologicalProcess-EBI-UniProt-GOA_27.02.2019_00h00	0.00345478	0.00401468	[4]	Group351	14.2857	[4]
GO:0035094	response to nicotine	GO_BiologicalProcess-EBI-UniProt-GOA_27.02.2019_00h00	0.0124657	0.0133956	[4]	Group450	6.55738	[4]
GO:0035088	establishment or maintenance of apical/basal cell polarity	GO_BiologicalProcess-EBI-UniProt-GOA_27.02.2019_00h00	0.0162659	0.0172475	[4]	Group014	6.06061	[4]
GO:0006801	superoxide metabolic process	GO_BiologicalProcess-EBI-UniProt-GOA_27.02.2019_00h00	0.0410735	0.0419122	[4]	Group381	4.54545	[4]
GO:0031399	regulation of protein modification process	GO_BiologicalProcess-EBI-UniProt-GOA_27.02.2019_00h00	6.48221e-33	9.42277e-31	[5, 6, 7]	Group485	4.8791	[5
GO:2000113	negative regulation of cellular macromolecule biosynthetic process	GO_BiologicalProcess-EBI-UniProt-GOA_27.02.2019_00h00	3.63059e-17	3.4351e-16	[5, 6, 7]	Group516	4.19463	[5
GO:0007169	transmembrane receptor protein tyrosine kinase signaling pathway	GO_BiologicalProcess-EBI-UniProt-GOA_27.02.2019_00h00	3.80697e-16	3.07442e-15	[5, 6, 7]	Group336	5.56174	[5
GO:0055024	regulation of cardiac muscle tissue development	GO_BiologicalProcess-EBI-UniProt-GOA_27.02.2019_00h00	5.97011e-15	4.20537e-14	[5, 6, 7, 8, 9]	Group529	16.5217	[5
GO:0000082	G1/S transition of mitotic cell cycle	GO_BiologicalProcess-EBI-UniProt-GOA_27.02.2019_00h00	1.18523e-14	7.79909e-14	[5, 6]	Group550	8.81459	[5
GO:0001654	eye development	GO_BiologicalProcess-EBI-UniProt-GOA_27.02.2019_00h00	1.33801e-11	6.27415e-11	[5, 6, 7]	Group168	6.66667	[5
GO:1902806	regulation of cell cycle G1/S phase transition	GO_BiologicalProcess-EBI-UniProt-GOA_27.02.2019_00h00	5.60384e-10	2.19621e-09	[5, 6, 7]	Group616	8.26446	[5
GO:0002573	myeloid leukocyte differentiation	GO_BiologicalProcess-EBI-UniProt-GOA_27.02.2019_00h00	7.16783e-10	2.73541e-09	[5, 6, 7, 8, 9]	Group330	7.72059	[5
GO:0055007	cardiac muscle cell differentiation	GO_BiologicalProcess-EBI-UniProt-GOA_27.02.2019_00h00	8.04346e-10	3.01913e-09	[5, 6, 7, 8]	Group368	9.82659	[5
GO:2000826	regulation of heart morphogenesis	GO_BiologicalProcess-EBI-UniProt-GOA_27.02.2019_00h00	1.30229e-08	4.05127e-08	[5, 6, 7, 8]	Group312	20.4545	[5
GO:0071479	cellular response to ionizing radiation	GO_BiologicalProcess-EBI-UniProt-GOA_27.02.2019_00h00	1.53305e-08	4.7232e-08	[5, 6]	Group388	12.6316	[5
GO:0030217	T cell differentiation	GO_BiologicalProcess-EBI-UniProt-GOA_27.02.2019_00h00	2.12206e-08	6.35425e-08	[5, 6, 7, 8, 9, 10]	Group092	6.68896	[5
GO:0051896	regulation of protein kinase B signaling	GO_BiologicalProcess-EBI-UniProt-GOA_27.02.2019_00h00	3.12013e-08	8.97318e-08	[5, 6, 7]	Group098	6.53595	[5
GO:0110020	regulation of actomyosin structure organization	GO_BiologicalProcess-EBI-UniProt-GOA_27.02.2019_00h00	4.55108e-08	1.2678e-07	[5, 6, 7, 8]	Group525	10.3175	[5
GO:0030330	DNA damage response, signal transduction by p53 class mediator	GO_BiologicalProcess-EBI-UniProt-GOA_27.02.2019_00h00	7.49511e-08	2.01762e-07	[5, 6, 7]	Group378	9.03226	[5
GO:0031571	mitotic G1 DNA damage checkpoint	GO_BiologicalProcess-EBI-UniProt-GOA_27.02.2019_00h00	8.70409e-08	2.30428e-07	[5, 6, 7, 8, 9, 10, 11]	Group476	12.2222	[5
GO:0000079	regulation of cyclin-dependent protein serine/threonine kinase activity	GO_BiologicalProcess-EBI-UniProt-GOA_27.02.2019_00h00	1.73056e-07	4.41334e-07	[5, 6, 7, 8, 9, 10, 11]	Group480	9.21986	[5
GO:0030879	mammary gland development	GO_BiologicalProcess-EBI-UniProt-GOA_27.02.2019_00h00	2.44284e-07	6.06537e-07	[5, 6, 7]	Group120	7.61421	[5
GO:0060538	skeletal muscle organ development	GO_BiologicalProcess-EBI-UniProt-GOA_27.02.2019_00h00	2.95179e-07	7.22805e-07	[5, 6, 7]	Group093	7.01754	[5
GO:0030521	androgen receptor signaling pathway	GO_BiologicalProcess-EBI-UniProt-GOA_27.02.2019_00h00	3.46207e-07	8.29962e-07	[5, 6, 7, 8, 9]	Group238	12.1951	[5
GO:0002761	regulation of myeloid leukocyte differentiation	GO_BiologicalProcess-EBI-UniProt-GOA_27.02.2019_00h00	3.84553e-07	9.16393e-07	[5, 6, 7, 8, 9, 10]	Group189	8.60927	[5
GO:0043536	positive regulation of blood vessel endothelial cell migration	GO_BiologicalProcess-EBI-UniProt-GOA_27.02.2019_00h00	4.35394e-07	1.02533e-06	[5, 6, 7, 8, 9, 10]	Group202	11.9048	[5
GO:0003197	endocardial cushion development	GO_BiologicalProcess-EBI-UniProt-GOA_27.02.2019_00h00	7.39983e-07	1.65719e-06	[5, 6, 7]	Group557	15.6863	[5
GO:0042098	T cell proliferation	GO_BiologicalProcess-EBI-UniProt-GOA_27.02.2019_00h00	1.06685e-06	2.31779e-06	[5, 6]	Group296	6.3745	[5
GO:0002042	cell migration involved in sprouting angiogenesis	GO_BiologicalProcess-EBI-UniProt-GOA_27.02.2019_00h00	1.22748e-06	2.63809e-06	[5, 6, 7, 8, 9, 10, 11, 12]	Group184	12.3288	[5
GO:0045619	regulation of lymphocyte differentiation	GO_BiologicalProcess-EBI-UniProt-GOA_27.02.2019_00h00	1.90249e-06	3.95589e-06	[5, 6, 7, 8, 9, 10]	Group401	6.93069	[5
GO:0019207	kinase regulator activity	GO_BiologicalProcess-EBI-UniProt-GOA_27.02.2019_00h00	3.18737e-06	6.4189e-06	[5, 6, 8, 9]	Group556	5.86081	[5
GO:0051056	regulation of small GTPase mediated signal transduction	GO_BiologicalProcess-EBI-UniProt-GOA_27.02.2019_00h00	3.53327e-06	7.06212e-06	[5, 6, 7]	Group273	4.67706	[5
GO:0010769	regulation of cell morphogenesis involved in differentiation	GO_BiologicalProcess-EBI-UniProt-GOA_27.02.2019_00h00	4.00444e-06	7.92463e-06	[5, 6, 7]	Group094	5	[5
GO:0031960	response to corticosteroid	GO_BiologicalProcess-EBI-UniProt-GOA_27.02.2019_00h00	4.42544e-06	8.68256e-06	[5, 6]	Group340	6.04839	[5
GO:0048015	phosphatidylinositol-mediated signaling	GO_BiologicalProcess-EBI-UniProt-GOA_27.02.2019_00h00	4.64759e-06	9.08497e-06	[5, 6, 7]	Group344	6.0241	[5
GO:1901796	regulation of signal transduction by p53 class mediator	GO_BiologicalProcess-EBI-UniProt-GOA_27.02.2019_00h00	5.63912e-06	1.08769e-05	[5, 6, 7]	Group277	5.92885	[5
GO:0006006	glucose metabolic process	GO_BiologicalProcess-EBI-UniProt-GOA_27.02.2019_00h00	6.03272e-06	1.16081e-05	[5, 6]	Group533	5.57491	[5
GO:0061180	mammary gland epithelium development	GO_BiologicalProcess-EBI-UniProt-GOA_27.02.2019_00h00	1.32762e-05	2.39061e-05	[5, 6, 7, 8]	Group290	9.27835	[5
GO:0060977	coronary vasculature morphogenesis	GO_BiologicalProcess-EBI-UniProt-GOA_27.02.2019_00h00	1.436e-05	2.57418e-05	[5, 6, 7, 8, 9, 10]	Group056	22.7273	[5
GO:0045740	positive regulation of DNA replication	GO_BiologicalProcess-EBI-UniProt-GOA_27.02.2019_00h00	1.75032e-05	3.07894e-05	[5, 6, 7, 8, 9]	Group200	12.5	[5
GO:0030219	megakaryocyte differentiation	GO_BiologicalProcess-EBI-UniProt-GOA_27.02.2019_00h00	2.02495e-05	3.52711e-05	[5, 6, 7, 8, 9]	Group177	7.8125	[5
GO:0050672	negative regulation of lymphocyte proliferation	GO_BiologicalProcess-EBI-UniProt-GOA_27.02.2019_00h00	2.71814e-05	4.63358e-05	[5, 6, 7, 8]	Group287	8.49057	[5
GO:0045792	negative regulation of cell size	GO_BiologicalProcess-EBI-UniProt-GOA_27.02.2019_00h00	4.10693e-05	6.73536e-05	[5, 6]	Group240	28.5714	[5
GO:2001251	negative regulation of chromosome organization	GO_BiologicalProcess-EBI-UniProt-GOA_27.02.2019_00h00	6.96847e-05	0.000109134	[5, 6, 7]	Group653	5.71429	[5
GO:0072215	regulation of metanephros development	GO_BiologicalProcess-EBI-UniProt-GOA_27.02.2019_00h00	7.05604e-05	0.000110397	[5, 6, 7, 8, 9]	Group048	16.6667	[5
GO:1900542	regulation of purine nucleotide metabolic process	GO_BiologicalProcess-EBI-UniProt-GOA_27.02.2019_00h00	7.65844e-05	0.000118892	[5, 6, 7, 8, 9]	Group308	6.11111	[5
GO:0014033	neural crest cell differentiation	GO_BiologicalProcess-EBI-UniProt-GOA_27.02.2019_00h00	7.71695e-05	0.000119684	[5, 6, 7, 8]	Group180	7.43802	[5
GO:0048259	regulation of receptor-mediated endocytosis	GO_BiologicalProcess-EBI-UniProt-GOA_27.02.2019_00h00	0.000119071	0.000177276	[5, 6, 7]	Group143	7.03125	[5
GO:2000278	regulation of DNA biosynthetic process	GO_BiologicalProcess-EBI-UniProt-GOA_27.02.2019_00h00	0.000148846	0.000218755	[5, 6, 7, 8]	Group297	6.17284	[5
GO:1905564	positive regulation of vascular endothelial cell proliferation	GO_BiologicalProcess-EBI-UniProt-GOA_27.02.2019_00h00	0.000150043	0.000219907	[5, 6, 7, 8]	Group172	21.0526	[5
GO:0044070	regulation of anion transport	GO_BiologicalProcess-EBI-UniProt-GOA_27.02.2019_00h00	0.00023467	0.000333248	[5, 6]	Group293	6.42857	[5
GO:0035280	miRNA loading onto RISC involved in gene silencing by miRNA	GO_BiologicalProcess-EBI-UniProt-GOA_27.02.2019_00h00	0.000248703	0.000351304	[5, 6, 7, 8, 9, 10, 11]	Group345	33.3333	[5
GO:0035850	epithelial cell differentiation involved in kidney development	GO_BiologicalProcess-EBI-UniProt-GOA_27.02.2019_00h00	0.000272827	0.000382006	[5, 6, 7, 8, 9]	Group503	9.83607	[5
GO:0035196	production of miRNAs involved in gene silencing by miRNA	GO_BiologicalProcess-EBI-UniProt-GOA_27.02.2019_00h00	0.00029837	0.000414864	[5, 6, 8, 9, 10, 11]	Group072	9.67742	[5
GO:1903799	negative regulation of production of miRNAs involved in gene silencing by miRNA	GO_BiologicalProcess-EBI-UniProt-GOA_27.02.2019_00h00	0.000351421	0.000481924	[5, 6, 7, 8, 9, 10, 11, 12, 13]	Group386	30	[5
GO:0035195	gene silencing by miRNA	GO_BiologicalProcess-EBI-UniProt-GOA_27.02.2019_00h00	0.000433064	0.000585351	[5, 8, 9, 10]	Group254	5.40541	[5
GO:0033619	membrane protein proteolysis	GO_BiologicalProcess-EBI-UniProt-GOA_27.02.2019_00h00	0.000480152	0.000643017	[5, 6]	Group134	7.44681	[5
GO:2000573	positive regulation of DNA biosynthetic process	GO_BiologicalProcess-EBI-UniProt-GOA_27.02.2019_00h00	0.000580486	0.000765208	[5, 6, 7, 8, 9]	Group672	7.2165	[5
GO:0071542	dopaminergic neuron differentiation	GO_BiologicalProcess-EBI-UniProt-GOA_27.02.2019_00h00	0.00061923	0.000814267	[5, 7, 8, 9]	Group088	10.6383	[5
GO:0006308	DNA catabolic process	GO_BiologicalProcess-EBI-UniProt-GOA_27.02.2019_00h00	0.00061923	0.000814267	[5, 6, 7]	Group223	10.6383	[5
GO:0006265	DNA topological change	GO_BiologicalProcess-EBI-UniProt-GOA_27.02.2019_00h00	0.000630333	0.000826149	[5, 6, 7]	Group035	25	[5
GO:0045652	regulation of megakaryocyte differentiation	GO_BiologicalProcess-EBI-UniProt-GOA_27.02.2019_00h00	0.000656152	0.000858582	[5, 6, 7, 8, 9, 10]	Group564	7.07071	[5
GO:0032070	regulation of deoxyribonuclease activity	GO_BiologicalProcess-EBI-UniProt-GOA_27.02.2019_00h00	0.000810529	0.00104603	[5, 6, 7, 8, 9]	Group234	23.0769	[5
GO:0032308	positive regulation of prostaglandin secretion	GO_BiologicalProcess-EBI-UniProt-GOA_27.02.2019_00h00	0.000810529	0.00104603	[5, 6, 7, 8, 9, 10, 11, 12, 13]	Group282	23.0769	[5
GO:0004536	deoxyribonuclease activity	GO_BiologicalProcess-EBI-UniProt-GOA_27.02.2019_00h00	0.0013302	0.00165912	[5, 6, 7, 8]	Group155	7.31707	[5
GO:0061154	endothelial tube morphogenesis	GO_BiologicalProcess-EBI-UniProt-GOA_27.02.2019_00h00	0.00184488	0.00223821	[5, 6, 7]	Group448	17.6471	[5
GO:2000191	regulation of fatty acid transport	GO_BiologicalProcess-EBI-UniProt-GOA_27.02.2019_00h00	0.00187319	0.0022674	[5, 6, 7, 9, 10]	Group283	11.1111	[5
GO:0010763	positive regulation of fibroblast migration	GO_BiologicalProcess-EBI-UniProt-GOA_27.02.2019_00h00	0.00257235	0.00304907	[5, 6, 7, 8]	Group129	15.7895	[5
GO:0006337	nucleosome disassembly	GO_BiologicalProcess-EBI-UniProt-GOA_27.02.2019_00h00	0.00257235	0.00304907	[5, 6, 7, 8]	Group361	15.7895	[5
GO:0006111	regulation of gluconeogenesis	GO_BiologicalProcess-EBI-UniProt-GOA_27.02.2019_00h00	0.00268965	0.00318103	[5, 6, 7, 8]	Group494	7.69231	[5
GO:0042987	amyloid precursor protein catabolic process	GO_BiologicalProcess-EBI-UniProt-GOA_27.02.2019_00h00	0.00327543	0.00382014	[5, 6]	Group138	7.35294	[5
GO:0072077	renal vesicle morphogenesis	GO_BiologicalProcess-EBI-UniProt-GOA_27.02.2019_00h00	0.00450158	0.00514144	[5, 6, 7, 8, 9, 10, 11]	Group369	13.0435	[5
GO:0048704	embryonic skeletal system morphogenesis	GO_BiologicalProcess-EBI-UniProt-GOA_27.02.2019_00h00	0.00506389	0.0057386	[5, 6, 7, 8]	Group458	5.60748	[5
GO:0032799	low-density lipoprotein receptor particle metabolic process	GO_BiologicalProcess-EBI-UniProt-GOA_27.02.2019_00h00	0.0063975	0.0071386	[5, 6]	Group198	11.5385	[5
GO:0010310	regulation of hydrogen peroxide metabolic process	GO_BiologicalProcess-EBI-UniProt-GOA_27.02.2019_00h00	0.0063975	0.0071386	[5, 6]	Group604	11.5385	[5
GO:0046426	negative regulation of receptor signaling pathway via JAK-STAT	GO_BiologicalProcess-EBI-UniProt-GOA_27.02.2019_00h00	0.00956757	0.0104356	[5, 6, 7, 8, 9]	Group376	10	[5
GO:0046822	regulation of nucleocytoplasmic transport	GO_BiologicalProcess-EBI-UniProt-GOA_27.02.2019_00h00	0.0160309	0.0170208	[5, 6, 7]	Group403	4.37956	[5
GO:0046530	photoreceptor cell differentiation	GO_BiologicalProcess-EBI-UniProt-GOA_27.02.2019_00h00	0.0197768	0.020791	[5, 7, 8, 9]	Group501	5.71429	[5
GO:0002446	neutrophil mediated immunity	GO_BiologicalProcess-EBI-UniProt-GOA_27.02.2019_00h00	1.03532e-06	2.25541e-06	[5]	Group187	4.11765	[5]
GO:0003158	endothelium development	GO_BiologicalProcess-EBI-UniProt-GOA_27.02.2019_00h00	1.1347e-06	2.45518e-06	[5]	Group342	8.57143	[5]
GO:1904019	epithelial cell apoptotic process	GO_BiologicalProcess-EBI-UniProt-GOA_27.02.2019_00h00	1.42199e-06	3.01561e-06	[5]	Group315	8.39161	[5]
GO:0071887	leukocyte apoptotic process	GO_BiologicalProcess-EBI-UniProt-GOA_27.02.2019_00h00	3.55018e-06	7.08706e-06	[5]	Group510	7.69231	[5]
GO:0034614	cellular response to reactive oxygen species	GO_BiologicalProcess-EBI-UniProt-GOA_27.02.2019_00h00	3.11351e-05	5.21856e-05	[5]	Group374	5.77778	[5]
GO:0097306	cellular response to alcohol	GO_BiologicalProcess-EBI-UniProt-GOA_27.02.2019_00h00	7.23491e-05	0.000112975	[5]	Group103	7.5	[5]
GO:0010742	macrophage derived foam cell differentiation	GO_BiologicalProcess-EBI-UniProt-GOA_27.02.2019_00h00	0.000138312	0.000204212	[5]	Group068	11.1111	[5]
GO:0010288	response to lead ion	GO_BiologicalProcess-EBI-UniProt-GOA_27.02.2019_00h00	0.00017366	0.000251981	[5]	Group242	13.8889	[5]
GO:0043388	positive regulation of DNA binding	GO_BiologicalProcess-EBI-UniProt-GOA_27.02.2019_00h00	0.000207152	0.000296011	[5]	Group131	8.53659	[5]
GO:0016709	oxidoreductase activity, acting on paired donors, with incorporation or reduction of molecular oxygen, NAD(P)H as one donor, and incorporation of one atom of oxygen	GO_BiologicalProcess-EBI-UniProt-GOA_27.02.2019_00h00	0.000506677	0.00067571	[5]	Group224	6.45161	[5]
GO:0043276	anoikis	GO_BiologicalProcess-EBI-UniProt-GOA_27.02.2019_00h00	0.000825144	0.00106318	[5]	Group061	10	[5]
GO:0014074	response to purine-containing compound	GO_BiologicalProcess-EBI-UniProt-GOA_27.02.2019_00h00	0.00115059	0.00145209	[5]	Group086	4.7619	[5]
GO:0055088	lipid homeostasis	GO_BiologicalProcess-EBI-UniProt-GOA_27.02.2019_00h00	0.00434723	0.00497939	[5]	Group095	4.5977	[5]
GO:0098739	import across plasma membrane	GO_BiologicalProcess-EBI-UniProt-GOA_27.02.2019_00h00	0.00875998	0.00958085	[5]	Group425	4.4586	[5]
GO:0002448	mast cell mediated immunity	GO_BiologicalProcess-EBI-UniProt-GOA_27.02.2019_00h00	0.0111219	0.0120324	[5]	Group679	6.77966	[5]
GO:0006468	protein phosphorylation	GO_BiologicalProcess-EBI-UniProt-GOA_27.02.2019_00h00	1.14658e-28	7.63906e-27	[6, 7]	Group551	4.4843	[6
GO:0042327	positive regulation of phosphorylation	GO_BiologicalProcess-EBI-UniProt-GOA_27.02.2019_00h00	1.71749e-21	3.39045e-20	[6, 7, 8]	Group598	5.23985	[6
GO:0006352	DNA-templated transcription, initiation	GO_BiologicalProcess-EBI-UniProt-GOA_27.02.2019_00h00	1.64259e-08	5.01242e-08	[6, 7, 8, 9, 10]	Group067	6.19718	[6
GO:1903320	regulation of protein modification by small protein conjugation or removal	GO_BiologicalProcess-EBI-UniProt-GOA_27.02.2019_00h00	2.37191e-08	7.03652e-08	[6, 7, 8]	Group307	6.64452	[6
GO:0048010	vascular endothelial growth factor receptor signaling pathway	GO_BiologicalProcess-EBI-UniProt-GOA_27.02.2019_00h00	4.70251e-07	1.09931e-06	[6, 7, 8]	Group260	9.30233	[6
GO:0070372	regulation of ERK1 and ERK2 cascade	GO_BiologicalProcess-EBI-UniProt-GOA_27.02.2019_00h00	6.6079e-07	1.49449e-06	[6, 7, 8, 9, 10, 11]	Group144	5.19802	[6
GO:0090311	regulation of protein deacetylation	GO_BiologicalProcess-EBI-UniProt-GOA_27.02.2019_00h00	1.00406e-06	2.19029e-06	[6, 7, 8, 9]	Group523	15.0943	[6
GO:0016579	protein deubiquitination	GO_BiologicalProcess-EBI-UniProt-GOA_27.02.2019_00h00	1.25083e-06	2.68467e-06	[6, 7, 8, 9]	Group073	5.41311	[6
GO:0030316	osteoclast differentiation	GO_BiologicalProcess-EBI-UniProt-GOA_27.02.2019_00h00	1.64295e-06	3.44309e-06	[6, 7, 8, 9, 10]	Group140	9.16667	[6
GO:0060389	pathway-restricted SMAD protein phosphorylation	GO_BiologicalProcess-EBI-UniProt-GOA_27.02.2019_00h00	1.93746e-06	4.02337e-06	[6, 7, 8]	Group622	11.6883	[6
GO:0048012	hepatocyte growth factor receptor signaling pathway	GO_BiologicalProcess-EBI-UniProt-GOA_27.02.2019_00h00	4.27651e-06	8.41099e-06	[6, 7, 8]	Group051	20	[6
GO:0051385	response to mineralocorticoid	GO_BiologicalProcess-EBI-UniProt-GOA_27.02.2019_00h00	5.31509e-06	1.03016e-05	[6, 7]	Group192	14.8936	[6
GO:0045670	regulation of osteoclast differentiation	GO_BiologicalProcess-EBI-UniProt-GOA_27.02.2019_00h00	1.59381e-05	2.82226e-05	[6, 7, 8, 9, 10, 11]	Group382	10.5263	[6
GO:0030225	macrophage differentiation	GO_BiologicalProcess-EBI-UniProt-GOA_27.02.2019_00h00	2.21295e-05	3.8337e-05	[6, 7, 8, 9, 10]	Group164	12.069	[6
GO:0038066	p38MAPK cascade	GO_BiologicalProcess-EBI-UniProt-GOA_27.02.2019_00h00	3.09227e-05	5.19385e-05	[6, 7, 8, 10, 11]	Group262	11.4754	[6
GO:0045580	regulation of T cell differentiation	GO_BiologicalProcess-EBI-UniProt-GOA_27.02.2019_00h00	3.4698e-05	5.76138e-05	[6, 7, 8, 9, 10, 11]	Group317	6.66667	[6
GO:0008286	insulin receptor signaling pathway	GO_BiologicalProcess-EBI-UniProt-GOA_27.02.2019_00h00	4.56261e-05	7.41424e-05	[6, 7, 8, 9]	Group070	6.47059	[6
GO:0030260	entry into host cell	GO_BiologicalProcess-EBI-UniProt-GOA_27.02.2019_00h00	6.58237e-05	0.000103799	[6, 7]	Group269	6.21469	[6
GO:0032486	Rap protein signal transduction	GO_BiologicalProcess-EBI-UniProt-GOA_27.02.2019_00h00	7.29536e-05	0.000113586	[6, 7, 8]	Group010	25	[6
GO:0051170	import into nucleus	GO_BiologicalProcess-EBI-UniProt-GOA_27.02.2019_00h00	9.95393e-05	0.000150438	[6, 7]	Group524	5.50459	[6
GO:0072075	metanephric mesenchyme development	GO_BiologicalProcess-EBI-UniProt-GOA_27.02.2019_00h00	0.000119839	0.000178254	[6, 7, 8, 9]	Group244	22.2222	[6
GO:0006470	protein dephosphorylation	GO_BiologicalProcess-EBI-UniProt-GOA_27.02.2019_00h00	0.000149699	0.000219604	[6, 7]	Group078	4.10628	[6
GO:1903322	positive regulation of protein modification by small protein conjugation or removal	GO_BiologicalProcess-EBI-UniProt-GOA_27.02.2019_00h00	0.000304942	0.000422532	[6, 7, 8, 9]	Group395	5.64972	[6
GO:0010660	regulation of muscle cell apoptotic process	GO_BiologicalProcess-EBI-UniProt-GOA_27.02.2019_00h00	0.000320937	0.000443926	[6, 7]	Group085	7.95455	[6
GO:0048013	ephrin receptor signaling pathway	GO_BiologicalProcess-EBI-UniProt-GOA_27.02.2019_00h00	0.000342844	0.000470969	[6, 7, 8]	Group580	6.83761	[6
GO:0002327	immature B cell differentiation	GO_BiologicalProcess-EBI-UniProt-GOA_27.02.2019_00h00	0.000351421	0.000481924	[6, 7, 8, 9, 10, 11]	Group021	30	[6
GO:0071380	cellular response to prostaglandin E stimulus	GO_BiologicalProcess-EBI-UniProt-GOA_27.02.2019_00h00	0.000456773	0.000613765	[6, 7, 8]	Group289	16	[6
GO:2000106	regulation of leukocyte apoptotic process	GO_BiologicalProcess-EBI-UniProt-GOA_27.02.2019_00h00	0.000534536	0.000709902	[6, 7]	Group105	6.4	[6
GO:1990314	cellular response to insulin-like growth factor stimulus	GO_BiologicalProcess-EBI-UniProt-GOA_27.02.2019_00h00	0.000630333	0.000826149	[6, 7, 8]	Group203	25	[6
GO:0060982	coronary artery morphogenesis	GO_BiologicalProcess-EBI-UniProt-GOA_27.02.2019_00h00	0.000630333	0.000826149	[6, 7, 8, 9, 10, 11]	Group619	25	[6
GO:0033683	nucleotide-excision repair, DNA incision	GO_BiologicalProcess-EBI-UniProt-GOA_27.02.2019_00h00	0.000751569	0.000973084	[6, 7, 8, 9]	Group670	10.2041	[6
GO:0006261	DNA-dependent DNA replication	GO_BiologicalProcess-EBI-UniProt-GOA_27.02.2019_00h00	0.000994869	0.00126757	[6, 7, 8]	Group248	4.85437	[6
GO:0030166	proteoglycan biosynthetic process	GO_BiologicalProcess-EBI-UniProt-GOA_27.02.2019_00h00	0.00116979	0.00147399	[6, 7]	Group128	7.5	[6
GO:0045577	regulation of B cell differentiation	GO_BiologicalProcess-EBI-UniProt-GOA_27.02.2019_00h00	0.0020762	0.00249612	[6, 7, 8, 9, 10, 11]	Group101	10.8108	[6
GO:0006360	transcription by RNA polymerase I	GO_BiologicalProcess-EBI-UniProt-GOA_27.02.2019_00h00	0.00226879	0.00271339	[6, 7, 8, 9, 10]	Group521	6.59341	[6
GO:0002181	cytoplasmic translation	GO_BiologicalProcess-EBI-UniProt-GOA_27.02.2019_00h00	0.00290667	0.00342251	[6, 7, 8]	Group214	5.46875	[6
GO:0006278	RNA-dependent DNA biosynthetic process	GO_BiologicalProcess-EBI-UniProt-GOA_27.02.2019_00h00	0.00514156	0.00581836	[6, 7, 8]	Group127	4.92958	[6
GO:1903533	regulation of protein targeting	GO_BiologicalProcess-EBI-UniProt-GOA_27.02.2019_00h00	0.0071558	0.0079349	[6, 7, 8, 9, 10]	Group542	5.21739	[6
GO:0032482	Rab protein signal transduction	GO_BiologicalProcess-EBI-UniProt-GOA_27.02.2019_00h00	0.00763729	0.00843955	[6, 7, 8]	Group357	6.0241	[6
GO:0090049	regulation of cell migration involved in sprouting angiogenesis	GO_BiologicalProcess-EBI-UniProt-GOA_27.02.2019_00h00	0.00766235	0.00846139	[6, 7, 8, 9, 10, 11, 12, 13]	Group593	7.54717	[6
GO:0018023	peptidyl-lysine trimethylation	GO_BiologicalProcess-EBI-UniProt-GOA_27.02.2019_00h00	0.008723	0.00954693	[6, 7, 8, 9, 10]	Group543	7.27273	[6
GO:0048596	embryonic camera-type eye morphogenesis	GO_BiologicalProcess-EBI-UniProt-GOA_27.02.2019_00h00	0.00956757	0.0104356	[6, 7, 8, 9, 10]	Group004	10	[6
GO:1900087	positive regulation of G1/S transition of mitotic cell cycle	GO_BiologicalProcess-EBI-UniProt-GOA_27.02.2019_00h00	0.0336134	0.0345423	[6, 7, 8, 9]	Group641	6.25	[6
GO:0070227	lymphocyte apoptotic process	GO_BiologicalProcess-EBI-UniProt-GOA_27.02.2019_00h00	1.56733e-05	2.78463e-05	[6]	Group372	9.09091	[6]
GO:2000679	positive regulation of transcription regulatory region DNA binding	GO_BiologicalProcess-EBI-UniProt-GOA_27.02.2019_00h00	9.73364e-05	0.000147948	[6]	Group250	15.625	[6]
GO:0034502	protein localization to chromosome	GO_BiologicalProcess-EBI-UniProt-GOA_27.02.2019_00h00	0.000506677	0.00067571	[6]	Group146	6.45161	[6]
GO:0043277	apoptotic cell clearance	GO_BiologicalProcess-EBI-UniProt-GOA_27.02.2019_00h00	0.00138468	0.00171902	[6]	Group110	8.92857	[6]
GO:0004672	protein kinase activity	GO_BiologicalProcess-EBI-UniProt-GOA_27.02.2019_00h00	3.08832e-24	1.0288e-22	[7, 8]	Group366	5.21512	[7
GO:0003712	transcription coregulator activity	GO_BiologicalProcess-EBI-UniProt-GOA_27.02.2019_00h00	6.13641e-08	1.68016e-07	[7, 8, 9, 10]	Group062	4.21456	[7
GO:0050730	regulation of peptidyl-tyrosine phosphorylation	GO_BiologicalProcess-EBI-UniProt-GOA_27.02.2019_00h00	1.91936e-07	4.84843e-07	[7, 8, 9, 10]	Group139	5.84795	[7
GO:0061614	pri-miRNA transcription by RNA polymerase II	GO_BiologicalProcess-EBI-UniProt-GOA_27.02.2019_00h00	1.34457e-06	2.86281e-06	[7, 8, 9, 10, 11]	Group082	14.5455	[7
GO:0035004	phosphatidylinositol 3-kinase activity	GO_BiologicalProcess-EBI-UniProt-GOA_27.02.2019_00h00	3.30045e-06	6.63827e-06	[7, 8, 9]	Group655	10.9756	[7
GO:0035635	entry of bacterium into host cell	GO_BiologicalProcess-EBI-UniProt-GOA_27.02.2019_00h00	1.12312e-05	2.05243e-05	[7, 8]	Group222	23.8095	[7
GO:2000756	regulation of peptidyl-lysine acetylation	GO_BiologicalProcess-EBI-UniProt-GOA_27.02.2019_00h00	1.44429e-05	2.58324e-05	[7, 8, 9, 10]	Group305	10.6667	[7
GO:0050731	positive regulation of peptidyl-tyrosine phosphorylation	GO_BiologicalProcess-EBI-UniProt-GOA_27.02.2019_00h00	2.00634e-05	3.49852e-05	[7, 8, 9, 10, 11]	Group213	5.64516	[7
GO:0009303	rRNA transcription	GO_BiologicalProcess-EBI-UniProt-GOA_27.02.2019_00h00	0.000364614	0.000498732	[7, 8, 9, 10, 11]	Group102	11.9048	[7
GO:0043506	regulation of JUN kinase activity	GO_BiologicalProcess-EBI-UniProt-GOA_27.02.2019_00h00	0.00423152	0.0048538	[7, 8, 9, 10, 11, 12, 13, 14]	Group552	5.10949	[7
GO:0000717	nucleotide-excision repair, DNA duplex unwinding	GO_BiologicalProcess-EBI-UniProt-GOA_27.02.2019_00h00	0.0057209	0.00643752	[7, 8, 9]	Group581	12	[7
GO:0098659	inorganic cation import across plasma membrane	GO_BiologicalProcess-EBI-UniProt-GOA_27.02.2019_00h00	0.0210879	0.0220967	[7, 8]	Group064	4.6729	[7
GO:0031952	regulation of protein autophosphorylation	GO_BiologicalProcess-EBI-UniProt-GOA_27.02.2019_00h00	0.0237214	0.0247105	[7, 8, 9]	Group008	5.40541	[7
GO:0006090	pyruvate metabolic process	GO_BiologicalProcess-EBI-UniProt-GOA_27.02.2019_00h00	8.34685e-05	0.000128456	[7]	Group539	5.60748	[7]
GO:0070198	protein localization to chromosome, telomeric region	GO_BiologicalProcess-EBI-UniProt-GOA_27.02.2019_00h00	0.0354271	0.0363361	[7]	Group334	6.12245	[7]
GO:0019199	transmembrane receptor protein kinase activity	GO_BiologicalProcess-EBI-UniProt-GOA_27.02.2019_00h00	4.38757e-09	1.44357e-08	[8, 9]	Group430	10.274	[8
GO:0071901	negative regulation of protein serine/threonine kinase activity	GO_BiologicalProcess-EBI-UniProt-GOA_27.02.2019_00h00	1.59357e-06	3.34837e-06	[8, 9, 10, 11]	Group188	7.03518	[8
GO:0004197	cysteine-type endopeptidase activity	GO_BiologicalProcess-EBI-UniProt-GOA_27.02.2019_00h00	1.16039e-05	2.11088e-05	[8, 9]	Group162	4.47427	[8
GO:0004713	protein tyrosine kinase activity	GO_BiologicalProcess-EBI-UniProt-GOA_27.02.2019_00h00	0.000274493	0.000383666	[8, 9, 10]	Group303	4.4164	[8
GO:0030291	protein serine/threonine kinase inhibitor activity	GO_BiologicalProcess-EBI-UniProt-GOA_27.02.2019_00h00	0.000903956	0.00115912	[8, 9, 10, 11, 12]	Group323	9.80392	[8
GO:0055076	transition metal ion homeostasis	GO_BiologicalProcess-EBI-UniProt-GOA_27.02.2019_00h00	0.000304942	0.000422532	[8]	Group038	5.64972	[8]

## Sheet: Supplemental table 6
microRNA specifically deregualted in patients carrying C9ORF, GRN or MAPT mutations
Frontal lobe				Temporal lobe
C9ROF	GRN	MAPT		C9ROF	GRN	MAPT
hsa-miR-1185-5p	hsa-miR-132-5p	hsa-miR-335-3p		hsa-miR-369-3p	hsa-miR-548o-3p	hsa-miR-181b-5p
hsa-miR-149-5p	hsa-miR-656-3p	hsa-miR-130b-3p			hsa-miR-192-5p	hsa-miR-582-3p
hsa-miR-144-3p	hsa-miR-29c-3p	hsa-miR-744-5p			hsa-miR-450a-5p	hsa-miR-2682-5p
hsa-miR-338-5p	hsa-miR-335-5p	hsa-miR-432-5p			hsa-miR-10b-5p	hsa-miR-126-5p
hsa-miR-378c	hsa-let-7d-5p	hsa-miR-210-3p			hsa-miR-548av-3p	hsa-miR-199a-3p
hsa-miR-144-5p	hsa-miR-374a-3p					hsa-miR-20b-5p
hsa-miR-148a-3p	hsa-miR-486-5p					hsa-miR-370-3p
hsa-miR-488-5p	hsa-miR-218-5p					hsa-miR-133a-3p
hsa-miR-106b-3p	hsa-miR-7-5p					hsa-miR-145-3p
hsa-miR-1247-5p	hsa-miR-6511b-3p					hsa-miR-502-3p
hsa-miR-497-5p	hsa-miR-184					hsa-miR-584-5p
hsa-miR-204-5p	hsa-let-7c-5p					hsa-miR-30c-5p
hsa-miR-423-5p	hsa-miR-485-5p					hsa-miR-708-5p
hsa-miR-193b-3p	hsa-miR-193a-5p					hsa-miR-1250-5p
hsa-miR-889-3p	hsa-miR-10a-5p					hsa-miR-490-3p
hsa-miR-767-5p	hsa-miR-299-3p					hsa-let-7b-5p
hsa-miR-378a-3p	hsa-miR-126-5p					hsa-miR-497-5p
hsa-miR-410-3p	hsa-miR-376a-3p					hsa-miR-34c-5p
hsa-miR-142-5p	hsa-miR-1249-3p					hsa-miR-129-2-3p
hsa-miR-346	hsa-miR-376c-3p					hsa-miR-204-5p
hsa-miR-27b-3p	hsa-miR-127-5p					hsa-miR-381-3p
hsa-miR-197-3p	hsa-miR-363-3p					hsa-miR-139-3p
hsa-miR-155-5p	hsa-miR-375					hsa-miR-194-5p
hsa-miR-323a-3p	hsa-miR-146b-5p					hsa-miR-455-3p
hsa-miR-145-5p	hsa-miR-5683					hsa-miR-199a-5p
hsa-miR-130a-3p	hsa-miR-369-3p					hsa-miR-127-5p
hsa-miR-451a	hsa-let-7g-5p					hsa-let-7d-5p
hsa-let-7b-3p	hsa-miR-1-3p					hsa-miR-99b-3p
hsa-miR-142-3p	hsa-miR-146b-3p					hsa-miR-17-5p
hsa-miR-664a-3p	hsa-miR-27b-5p					hsa-miR-363-3p
hsa-let-7i-3p	hsa-miR-32-5p					hsa-miR-6842-3p
hsa-miR-345-5p						hsa-miR-338-3p
hsa-miR-27a-3p						hsa-miR-16-2-3p
						hsa-miR-339-5p
						hsa-miR-186-5p
						hsa-miR-219a-5p
						hsa-miR-190a-5p
						hsa-miR-92b-3p
						hsa-miR-374b-5p
						hsa-miR-542-3p
						hsa-miR-362-5p
						hsa-miR-589-5p
						hsa-miR-431-3p
						hsa-miR-218-5p
						hsa-miR-212-3p
						hsa-miR-221-5p
						hsa-miR-379-5p
						hsa-miR-1224-5p
						hsa-miR-382-3p
						hsa-miR-127-3p
						hsa-miR-15b-5p
						hsa-miR-223-3p
						hsa-miR-142-5p
						hsa-miR-365b-3p
						hsa-miR-93-5p
						hsa-miR-432-5p
						hsa-miR-27b-3p
						hsa-miR-151b
						hsa-miR-134-5p
						hsa-miR-155-5p
						hsa-miR-654-5p
						hsa-miR-99a-3p
						hsa-miR-28-5p
						hsa-miR-625-3p
						hsa-miR-24-2-5p
						hsa-miR-138-5p
						hsa-miR-145-5p
						hsa-miR-20a-5p
						hsa-miR-451a
						hsa-miR-222-3p
						hsa-miR-23a-3p
						hsa-miR-195-5p
						hsa-miR-485-5p
						hsa-miR-125a-5p
						hsa-miR-199b-3p
						hsa-miR-660-5p
						hsa-miR-219a-2-3p
						hsa-miR-16-5p
						hsa-let-7e-3p
						hsa-miR-151a-5p
						hsa-miR-374a-5p
						hsa-miR-664a-3p
						hsa-miR-143-5p
						hsa-miR-144-5p
						hsa-miR-193a-5p
						hsa-miR-151a-3p
						hsa-miR-504-5p
						hsa-miR-382-5p
						hsa-miR-769-5p
						hsa-miR-365a-3p
						hsa-miR-27a-3p
						hsa-miR-380-5p
						hsa-miR-128-1-5p
						hsa-miR-539-5p
						hsa-miR-107
						hsa-miR-5010-3p

## Sheet: Supplemental table 7
Frontal_C9ORF_Brain_expressed_genes	Frontal_C9ORF_enriched GO terms											Frontal_GRN_Brain_expressed_genes	Frontal_GRN_Brain_enriched GO terms											Frontal_MAPT_Brain_expressed_genes	Frontal_MAPT_Brain_enriched GO terms
CCND1	ID	Term	Ontology Source	Term PValue	Term PValue Corrected with Benjamini-Hochberg	GOLevels	GOGroups	% Associated Genes	MinGOLevel	Rank		BRI3BP	ID	Term	Ontology Source	Term PValue	Term PValue Corrected with Benjamini-Hochberg	GOLevels	GOGroups	% Associated Genes	MinGOLevel	Rank		RCOR1	ID	Term	Ontology Source	Term PValue	Term PValue Corrected with Benjamini-Hochberg	GOLevels	GOGroups	% Associated Genes	MinGOLevel	Rank
YES1	GO:0048518	apoptotic process	GO_BiologicalProcess-EBI-UniProt-GOA-ACAP-ARAP_25.05.2022_00h00	2.80705e-25	1.16998e-22	[1, 2, 3]	Group587	5.2039	[1	1		EIF2AK2	GO:0001678	regulation of neuronal synaptic plasticity	GO_BiologicalProcess-EBI-UniProt-GOA-ACAP-ARAP_25.05.2022_00h00	1.31076e-24	3.57839e-22	[1, 2, 3]	Group524	4.50396	[1	1		PTAR1	GO:0002262	myeloid cell homeostasis	GO_BiologicalProcess-EBI-UniProt-GOA-ACAP-ARAP_25.05.2022_00h00	8.93318e-07	1.36975e-05	[2, 5]	Group12	4.32432	[2	1
DHX40	GO:0048519	protein metabolic process	GO_BiologicalProcess-EBI-UniProt-GOA-ACAP-ARAP_25.05.2022_00h00	1.04278e-21	9.87796e-20	[1, 2, 3]	Group587	5.29035	[1	1		CCND1	GO:0051338	regulation of stem cell differentiation	GO_BiologicalProcess-EBI-UniProt-GOA-ACAP-ARAP_25.05.2022_00h00	1.31076e-24	3.57839e-22	[1, 2, 3]	Group486	4.50396	[1	1		MNT	GO:0001666	response to hypoxia	GO_BiologicalProcess-EBI-UniProt-GOA-ACAP-ARAP_25.05.2022_00h00	3.6299e-10	1.66975e-08	[3, 5]	Group04	4.20712	[3	2
TGFBR2	GO:0048522	programmed cell death	GO_BiologicalProcess-EBI-UniProt-GOA-ACAP-ARAP_25.05.2022_00h00	2.71171e-25	1.4128e-22	[2, 3, 4]	Group587	5.38566	[2	2		LEMD3	GO:0006376	substantia nigra development	GO_BiologicalProcess-EBI-UniProt-GOA-ACAP-ARAP_25.05.2022_00h00	1.31076e-24	3.57839e-22	[1, 2, 3]	Group525	4.50396	[1	1		PTBP3	GO:0003281	ventricular septum development	GO_BiologicalProcess-EBI-UniProt-GOA-ACAP-ARAP_25.05.2022_00h00	0.000143944	0.000264857	[3, 4, 5]	Group11	4.09836	[3	2
CSF1R	GO:0048523	cellular component organization	GO_BiologicalProcess-EBI-UniProt-GOA-ACAP-ARAP_25.05.2022_00h00	1.68652e-23	3.51471e-21	[2, 3, 4]	Group587	5.57331	[2	2		AXL	GO:0007229	purine ribonucleoside triphosphate metabolic process	GO_BiologicalProcess-EBI-UniProt-GOA-ACAP-ARAP_25.05.2022_00h00	1.73435e-22	2.54949e-20	[1, 2, 3]	Group525	4.64909	[1	1		IGFBP3	GO:0003309	type B pancreatic cell differentiation	GO_BiologicalProcess-EBI-UniProt-GOA-ACAP-ARAP_25.05.2022_00h00	0.000173276	0.000295211	[3, 4, 5, 6, 7]	Group10	5.88235	[3	2
WDR77	GO:0009893	positive regulation of macromolecule metabolic process	GO_BiologicalProcess-EBI-UniProt-GOA-ACAP-ARAP_25.05.2022_00h00	1.44801e-22	1.88604e-20	[2, 3, 4]	Group587	5.90123	[2	2		RAB34	GO:0051223	ribonucleoside diphosphate metabolic process	GO_BiologicalProcess-EBI-UniProt-GOA-ACAP-ARAP_25.05.2022_00h00	1.73435e-22	2.54949e-20	[1, 2, 3]	Group523	4.64909	[1	1		SEH1L	GO:0071456	cellular response to hypoxia	GO_BiologicalProcess-EBI-UniProt-GOA-ACAP-ARAP_25.05.2022_00h00	8.81794e-09	2.02813e-07	[4, 6]	Group04	6.12245	[4	3
MCCC2	GO:0009893	regulation of primary metabolic process	GO_BiologicalProcess-EBI-UniProt-GOA-ACAP-ARAP_25.05.2022_00h00	1.44801e-22	1.88604e-20	[2, 3, 4]	Group510	5.90123	[2	2		ITGA6	GO:0043410	negative regulation of neuron projection regeneration	GO_BiologicalProcess-EBI-UniProt-GOA-ACAP-ARAP_25.05.2022_00h00	1.64521e-27	1.048e-24	[2, 3, 4]	Group524	4.79103	[2	2		DLL1	GO:0030218	erythrocyte differentiation	GO_BiologicalProcess-EBI-UniProt-GOA-ACAP-ARAP_25.05.2022_00h00	1.54612e-06	1.77804e-05	[4, 5, 6, 7, 8, 9]	Group12	5.07246	[4	3
C16orf62	GO:0019222	response to nitrogen compound	GO_BiologicalProcess-EBI-UniProt-GOA-ACAP-ARAP_25.05.2022_00h00	1.36754e-21	1.23911e-19	[2, 3]	Group587	4.93565	[2	2		ANKFY1	GO:0016477	porphyrin-containing compound biosynthetic process	GO_BiologicalProcess-EBI-UniProt-GOA-ACAP-ARAP_25.05.2022_00h00	1.64521e-27	1.048e-24	[2, 3, 4]	Group486	4.79103	[2	2		NIPBL	GO:0070507	regulation of microtubule cytoskeleton organization	GO_BiologicalProcess-EBI-UniProt-GOA-ACAP-ARAP_25.05.2022_00h00	5.9399e-06	5.46471e-05	[4, 5, 6, 7]	Group09	4.14201	[4	3
ERGIC1	GO:0019222	response to organonitrogen compound	GO_BiologicalProcess-EBI-UniProt-GOA-ACAP-ARAP_25.05.2022_00h00	1.36754e-21	1.23911e-19	[2, 3]	Group510	4.93565	[2	2		PDCD10	GO:0043523	chromosome organization	GO_BiologicalProcess-EBI-UniProt-GOA-ACAP-ARAP_25.05.2022_00h00	1.03944e-24	3.97274e-22	[2, 3]	Group486	4.919	[2	2		CSF1	GO:0043467	regulation of generation of precursor metabolites and energy	GO_BiologicalProcess-EBI-UniProt-GOA-ACAP-ARAP_25.05.2022_00h00	2.25723e-05	0.000115369	[4, 5]	Group05	4.31655	[4	3
CTNNBL1	GO:0007275	regulation of cellular catabolic process	GO_BiologicalProcess-EBI-UniProt-GOA-ACAP-ARAP_25.05.2022_00h00	1.47768e-19	8.32292e-18	[2, 3]	Group587	5.33386	[2	2		RFC2	GO:0046907	regulation of attachment of spindle microtubules to kinetochore	GO_BiologicalProcess-EBI-UniProt-GOA-ACAP-ARAP_25.05.2022_00h00	1.03944e-24	3.97274e-22	[2, 3]	Group524	4.919	[2	2		UVRAG	GO:0043244	regulation of protein-containing complex disassembly	GO_BiologicalProcess-EBI-UniProt-GOA-ACAP-ARAP_25.05.2022_00h00	1.83379e-05	0.000120506	[4, 5, 6]	Group09	4.47761	[4	3
LEMD3	GO:0009653	positive regulation of cellular component organization	GO_BiologicalProcess-EBI-UniProt-GOA-ACAP-ARAP_25.05.2022_00h00	7.16606e-17	2.6668e-15	[2, 3]	Group587	6.07428	[2	2		REV3L	GO:0031175	positive regulation of response to DNA damage stimulus	GO_BiologicalProcess-EBI-UniProt-GOA-ACAP-ARAP_25.05.2022_00h00	5.81988e-18	2.31704e-16	[2, 3]	Group490	5.08713	[2	2		PDGFRA	GO:0070102	interleukin-6-mediated signaling pathway	GO_BiologicalProcess-EBI-UniProt-GOA-ACAP-ARAP_25.05.2022_00h00	3.34019e-05	0.000139681	[4, 5]	Group10	4.02685	[4	3
BRI3BP	GO:0009892	blood vessel development	GO_BiologicalProcess-EBI-UniProt-GOA-ACAP-ARAP_25.05.2022_00h00	1.25954e-16	4.44896e-15	[2, 3, 4]	Group269	5.87865	[2	2		ABHD11	GO:0051962	positive regulation of transcription by RNA polymerase II	GO_BiologicalProcess-EBI-UniProt-GOA-ACAP-ARAP_25.05.2022_00h00	1.33617e-17	4.64259e-16	[2, 3]	Group486	4.78887	[2	2		DENND6A	GO:0045639	positive regulation of myeloid cell differentiation	GO_BiologicalProcess-EBI-UniProt-GOA-ACAP-ARAP_25.05.2022_00h00	3.34019e-05	0.000139681	[4, 5]	Group11	4.02685	[4	3
TNPO1	GO:0009892	regulation of organelle organization	GO_BiologicalProcess-EBI-UniProt-GOA-ACAP-ARAP_25.05.2022_00h00	1.25954e-16	4.44896e-15	[2, 3, 4]	Group587	5.87865	[2	2		DICER1	GO:0019438	regulation of protein kinase activity	GO_BiologicalProcess-EBI-UniProt-GOA-ACAP-ARAP_25.05.2022_00h00	1.33617e-17	4.64259e-16	[2, 3]	Group490	4.78887	[2	2		SMCHD1	GO:0001756	somitogenesis	GO_BiologicalProcess-EBI-UniProt-GOA-ACAP-ARAP_25.05.2022_00h00	7.40502e-05	0.000189239	[4, 5, 6, 7, 8, 9, 10]	Group12	4.71698	[4	3
MAP3K4	GO:0050793	anatomical structure formation involved in morphogenesis	GO_BiologicalProcess-EBI-UniProt-GOA-ACAP-ARAP_25.05.2022_00h00	3.8277e-16	1.22722e-14	[2, 3]	Group578	6.17613	[2	2		TTC17	GO:0042063	reproductive structure development	GO_BiologicalProcess-EBI-UniProt-GOA-ACAP-ARAP_25.05.2022_00h00	1.33617e-17	4.64259e-16	[2, 3]	Group525	4.78887	[2	2		SMAD4	GO:1903715	regulation of aerobic respiration	GO_BiologicalProcess-EBI-UniProt-GOA-ACAP-ARAP_25.05.2022_00h00	0.000106357	0.000222383	[4, 5, 6]	Group10	6.66667	[4	3
ANKRD13A	GO:0050793	negative regulation of nitrogen compound metabolic process	GO_BiologicalProcess-EBI-UniProt-GOA-ACAP-ARAP_25.05.2022_00h00	3.8277e-16	1.22722e-14	[2, 3]	Group419	6.17613	[2	2		USP28	GO:0016192	adherens junction organization	GO_BiologicalProcess-EBI-UniProt-GOA-ACAP-ARAP_25.05.2022_00h00	1.76217e-17	5.9079e-16	[2, 3]	Group525	5.56615	[2	2		RAD52	GO:0035194	post-transcriptional gene silencing by RNA	GO_BiologicalProcess-EBI-UniProt-GOA-ACAP-ARAP_25.05.2022_00h00	0.000106357	0.000222383	[4, 5, 6]	Group11	6.66667	[4	3
ABRACL	GO:0050793	positive regulation of intracellular signal transduction	GO_BiologicalProcess-EBI-UniProt-GOA-ACAP-ARAP_25.05.2022_00h00	3.8277e-16	1.22722e-14	[2, 3]	Group464	6.17613	[2	2		NUMB	GO:0072657	regulation of cell communication	GO_BiologicalProcess-EBI-UniProt-GOA-ACAP-ARAP_25.05.2022_00h00	1.76217e-17	5.9079e-16	[2, 3]	Group486	5.56615	[2	2		HIF3A	GO:0060038	cardiac muscle cell proliferation	GO_BiologicalProcess-EBI-UniProt-GOA-ACAP-ARAP_25.05.2022_00h00	0.000308987	0.000458496	[4, 5, 7, 8, 9]	Group01	5.06329	[4	3
SLC30A1	GO:0050793	positive regulation of signal transduction	GO_BiologicalProcess-EBI-UniProt-GOA-ACAP-ARAP_25.05.2022_00h00	3.8277e-16	1.22722e-14	[2, 3]	Group411	6.17613	[2	2		ZFPM2	GO:0032990	regulation of filopodium assembly	GO_BiologicalProcess-EBI-UniProt-GOA-ACAP-ARAP_25.05.2022_00h00	1.76217e-17	5.9079e-16	[2, 3]	Group322	5.56615	[2	2		SAV1	GO:0035196	miRNA processing	GO_BiologicalProcess-EBI-UniProt-GOA-ACAP-ARAP_25.05.2022_00h00	0.000392534	0.000564268	[4, 6, 7, 8, 9]	Group10	8.57143	[4	3
RAB34	GO:0050793	regulation of neuron death	GO_BiologicalProcess-EBI-UniProt-GOA-ACAP-ARAP_25.05.2022_00h00	3.8277e-16	1.22722e-14	[2, 3]	Group587	6.17613	[2	2		KIT	GO:0060438	regulation of peptidyl-lysine acetylation	GO_BiologicalProcess-EBI-UniProt-GOA-ACAP-ARAP_25.05.2022_00h00	1.76217e-17	5.9079e-16	[2, 3]	Group524	5.56615	[2	2		PTPN2	GO:0051893	regulation of focal adhesion assembly	GO_BiologicalProcess-EBI-UniProt-GOA-ACAP-ARAP_25.05.2022_00h00	0.000426961	0.000595158	[4, 5, 6, 7]	Group09	8.33333	[4	3
ANKFY1	GO:0023051	blood vessel morphogenesis	GO_BiologicalProcess-EBI-UniProt-GOA-ACAP-ARAP_25.05.2022_00h00	7.59637e-16	2.26155e-14	[2, 3]	Group587	5.62114	[2	2		PPA2	GO:0007420	cation transmembrane transport	GO_BiologicalProcess-EBI-UniProt-GOA-ACAP-ARAP_25.05.2022_00h00	1.61019e-15	3.66318e-14	[2, 3]	Group524	5.19481	[2	2		PIM1	GO:0035313	wound healing, spreading of epidermal cells	GO_BiologicalProcess-EBI-UniProt-GOA-ACAP-ARAP_25.05.2022_00h00	5.34408e-05	0.000153642	[5, 6, 7, 8]	Group09	5.05051	[5	4
IL13RA1	GO:0023051	glial cell differentiation	GO_BiologicalProcess-EBI-UniProt-GOA-ACAP-ARAP_25.05.2022_00h00	7.59637e-16	2.26155e-14	[2, 3]	Group578	5.62114	[2	2		HINT2	GO:0031399	regulation of muscle adaptation	GO_BiologicalProcess-EBI-UniProt-GOA-ACAP-ARAP_25.05.2022_00h00	1.61019e-15	3.66318e-14	[2, 3]	Group523	5.19481	[2	2		MIB1	GO:0002065	columnar/cuboidal epithelial cell differentiation	GO_BiologicalProcess-EBI-UniProt-GOA-ACAP-ARAP_25.05.2022_00h00	5.14535e-05	0.000157791	[5, 6, 7]	Group12	16.6667	[5	4
PLIN3	GO:0023051	macromolecule modification	GO_BiologicalProcess-EBI-UniProt-GOA-ACAP-ARAP_25.05.2022_00h00	7.59637e-16	2.26155e-14	[2, 3]	Group551	5.62114	[2	2		ALG2	GO:0033044	NIK/NF-kappaB signaling	GO_BiologicalProcess-EBI-UniProt-GOA-ACAP-ARAP_25.05.2022_00h00	4.99569e-15	1.07267e-13	[2, 3]	Group524	5.17182	[2	2		EFNA3	GO:0030325	adrenal gland development	GO_BiologicalProcess-EBI-UniProt-GOA-ACAP-ARAP_25.05.2022_00h00	8.31252e-05	0.000191188	[5, 7, 9, 10]	Group11	14.2857	[5	4
DDX21	GO:0023056	epithelium development	GO_BiologicalProcess-EBI-UniProt-GOA-ACAP-ARAP_25.05.2022_00h00	2.9567e-15	8.21567e-14	[2, 3, 4]	Group578	6.7908	[2	2		KIAA1522	GO:0007507	phospholipid metabolic process	GO_BiologicalProcess-EBI-UniProt-GOA-ACAP-ARAP_25.05.2022_00h00	4.99569e-15	1.07267e-13	[2, 3]	Group521	5.17182	[2	2		TNPO1	GO:0045648	positive regulation of erythrocyte differentiation	GO_BiologicalProcess-EBI-UniProt-GOA-ACAP-ARAP_25.05.2022_00h00	0.000155356	0.00027486	[5, 6]	Group10	4.03226	[5	4
C17orf80	GO:0023056	phosphorus metabolic process	GO_BiologicalProcess-EBI-UniProt-GOA-ACAP-ARAP_25.05.2022_00h00	2.9567e-15	8.21567e-14	[2, 3, 4]	Group390	6.7908	[2	2		C1orf27	GO:0050821	immune system development	GO_BiologicalProcess-EBI-UniProt-GOA-ACAP-ARAP_25.05.2022_00h00	3.02237e-13	4.73423e-12	[2, 3]	Group527	5.41272	[2	2		DICER1	GO:0043243	positive regulation of protein-containing complex disassembly	GO_BiologicalProcess-EBI-UniProt-GOA-ACAP-ARAP_25.05.2022_00h00	0.000200569	0.000329506	[5, 6]	Group10	10.7143	[5	4
CCDC137	GO:0023056	response to peptide	GO_BiologicalProcess-EBI-UniProt-GOA-ACAP-ARAP_25.05.2022_00h00	2.9567e-15	8.21567e-14	[2, 3, 4]	Group587	6.7908	[2	2		XIAP	GO:0030154	neuron recognition	GO_BiologicalProcess-EBI-UniProt-GOA-ACAP-ARAP_25.05.2022_00h00	3.02237e-13	4.73423e-12	[2, 3]	Group483	5.41272	[2	2		EHD2	GO:0040001	establishment of mitotic spindle localization	GO_BiologicalProcess-EBI-UniProt-GOA-ACAP-ARAP_25.05.2022_00h00	0.000200569	0.000329506	[5, 6]	Group11	10.7143	[5	4
AXL	GO:0051094	mitotic cell cycle process	GO_BiologicalProcess-EBI-UniProt-GOA-ACAP-ARAP_25.05.2022_00h00	1.06019e-14	2.48252e-13	[2, 3, 4]	Group587	7.30496	[2	2		ASPH	GO:0031099	positive regulation of cyclase activity	GO_BiologicalProcess-EBI-UniProt-GOA-ACAP-ARAP_25.05.2022_00h00	3.02237e-13	4.73423e-12	[2, 3]	Group465	5.41272	[2	2		CYLD	GO:0060043	regulation of cardiac muscle cell proliferation	GO_BiologicalProcess-EBI-UniProt-GOA-ACAP-ARAP_25.05.2022_00h00	0.000200569	0.000329506	[5, 6]	Group12	10.7143	[5	4
PDCD10	GO:0051094	negative regulation of neuron apoptotic process	GO_BiologicalProcess-EBI-UniProt-GOA-ACAP-ARAP_25.05.2022_00h00	1.06019e-14	2.48252e-13	[2, 3, 4]	Group419	7.30496	[2	2		CYLD	GO:0044087	positive regulation of peptidyl-threonine phosphorylation	GO_BiologicalProcess-EBI-UniProt-GOA-ACAP-ARAP_25.05.2022_00h00	3.02237e-13	4.73423e-12	[2, 3]	Group351	5.41272	[2	2		PAX6	GO:0008542	visual learning	GO_BiologicalProcess-EBI-UniProt-GOA-ACAP-ARAP_25.05.2022_00h00	0.000392534	0.000564268	[5, 6, 7, 8, 9, 10, 11]	Group07	8.57143	[5	4
CMSS1	GO:0051094	regulation of cell migration	GO_BiologicalProcess-EBI-UniProt-GOA-ACAP-ARAP_25.05.2022_00h00	1.06019e-14	2.48252e-13	[2, 3, 4]	Group515	7.30496	[2	2		SLC11A2	GO:0051017	cell-substrate adhesion	GO_BiologicalProcess-EBI-UniProt-GOA-ACAP-ARAP_25.05.2022_00h00	4.18793e-13	6.25245e-12	[2, 3, 4]	Group508	4.84124	[2	2		SFRP1	GO:0001947	heart looping	GO_BiologicalProcess-EBI-UniProt-GOA-ACAP-ARAP_25.05.2022_00h00	0.000392534	0.000564268	[5, 6, 7, 8, 9, 10, 11]	Group11	8.57143	[5	4
ZNF273	GO:0048583	ameboidal-type cell migration	GO_BiologicalProcess-EBI-UniProt-GOA-ACAP-ARAP_25.05.2022_00h00	8.09561e-14	1.39432e-12	[2, 3]	Group587	5.1899	[2	2		FN1	GO:1901700	positive regulation of MAPK cascade	GO_BiologicalProcess-EBI-UniProt-GOA-ACAP-ARAP_25.05.2022_00h00	4.18793e-13	6.25245e-12	[2, 3, 4]	Group233	4.84124	[2	2		VMP1	GO:0030239	myofibril assembly	GO_BiologicalProcess-EBI-UniProt-GOA-ACAP-ARAP_25.05.2022_00h00	0.000392534	0.000564268	[5, 6, 7, 8, 9, 10, 11]	Group12	8.57143	[5	4
CD82	GO:0048583	aromatic compound biosynthetic process	GO_BiologicalProcess-EBI-UniProt-GOA-ACAP-ARAP_25.05.2022_00h00	8.09561e-14	1.39432e-12	[2, 3]	Group578	5.1899	[2	2		LETM1	GO:0051049	protein-containing complex organization	GO_BiologicalProcess-EBI-UniProt-GOA-ACAP-ARAP_25.05.2022_00h00	6.37236e-13	9.02043e-12	[2, 3, 4]	Group523	5.69551	[2	2		NR3C1	GO:0002068	glandular epithelial cell development	GO_BiologicalProcess-EBI-UniProt-GOA-ACAP-ARAP_25.05.2022_00h00	2.12085e-05	0.000121949	[6, 7, 8]	Group10	10	[6	5
JAG2	GO:0048583	regulation of cellular response to stress	GO_BiologicalProcess-EBI-UniProt-GOA-ACAP-ARAP_25.05.2022_00h00	8.09561e-14	1.39432e-12	[2, 3]	Group551	5.1899	[2	2		MACROD1	GO:0051130	negative regulation of neurogenesis	GO_BiologicalProcess-EBI-UniProt-GOA-ACAP-ARAP_25.05.2022_00h00	2.60113e-12	3.18638e-11	[2, 3]	Group525	6.68498	[2	2		FOXN3	GO:0010586	miRNA metabolic process	GO_BiologicalProcess-EBI-UniProt-GOA-ACAP-ARAP_25.05.2022_00h00	2.12085e-05	0.000121949	[6, 7, 8]	Group11	10	[6	5
TRIM27	GO:0048583	response to lipid	GO_BiologicalProcess-EBI-UniProt-GOA-ACAP-ARAP_25.05.2022_00h00	8.09561e-14	1.39432e-12	[2, 3]	Group369	5.1899	[2	2		PPP2R2A	GO:0070828	phosphorylation	GO_BiologicalProcess-EBI-UniProt-GOA-ACAP-ARAP_25.05.2022_00h00	2.60113e-12	3.18638e-11	[2, 3]	Group521	6.68498	[2	2		CPEB2	GO:2000179	positive regulation of neural precursor cell proliferation	GO_BiologicalProcess-EBI-UniProt-GOA-ACAP-ARAP_25.05.2022_00h00	4.78149e-05	0.000157106	[6, 7, 8, 9, 10, 11, 12]	Group11	8.16327	[6	5
SNAP29	GO:0048646	positive regulation of phosphate metabolic process	GO_BiologicalProcess-EBI-UniProt-GOA-ACAP-ARAP_25.05.2022_00h00	1.72553e-13	2.78759e-12	[2, 3, 4]	Group587	7.41338	[2	2		EN2	GO:0016236	positive regulation of transcription from RNA polymerase II promoter in response to stress	GO_BiologicalProcess-EBI-UniProt-GOA-ACAP-ARAP_25.05.2022_00h00	2.60113e-12	3.18638e-11	[2, 3]	Group526	6.68498	[2	2		MCM3	GO:0010927	cellular component assembly involved in morphogenesis	GO_BiologicalProcess-EBI-UniProt-GOA-ACAP-ARAP_25.05.2022_00h00	4.78149e-05	0.000157106	[6, 7, 8, 9, 10, 11, 12]	Group12	8.16327	[6	5
PLXND1	GO:0032879	regulation of mitotic cell cycle	GO_BiologicalProcess-EBI-UniProt-GOA-ACAP-ARAP_25.05.2022_00h00	6.4094e-13	9.40647e-12	[2, 3]	Group577	6.08931	[2	2		KRAS	GO:0038061	cell surface receptor signaling pathway involved in cell-cell signaling	GO_BiologicalProcess-EBI-UniProt-GOA-ACAP-ARAP_25.05.2022_00h00	4.89736e-12	5.84929e-11	[2, 3, 4]	Group342	8.26446	[2	2		KCMF1	GO:1901879	regulation of protein depolymerization	GO_BiologicalProcess-EBI-UniProt-GOA-ACAP-ARAP_25.05.2022_00h00	0.000272779	0.000432684	[6, 7]	Group05	9.67742	[6	5
DICER1	GO:0050794	negative regulation of cell communication	GO_BiologicalProcess-EBI-UniProt-GOA-ACAP-ARAP_25.05.2022_00h00	6.77585e-13	9.87474e-12	[2, 3]	Group587	4.03296	[2	2		WDR11	GO:0044093	negative regulation of oxidative stress-induced cell death	GO_BiologicalProcess-EBI-UniProt-GOA-ACAP-ARAP_25.05.2022_00h00	1.24118e-11	1.34767e-10	[2, 3, 4]	Group373	5.09474	[2	2		NES	GO:1900368	regulation of post-transcriptional gene silencing by RNA	GO_BiologicalProcess-EBI-UniProt-GOA-ACAP-ARAP_25.05.2022_00h00	0.00029425	0.000451184	[6, 7, 8]	Group08	5.12821	[6	5
ALPL	GO:0002682	cellular response to amino acid starvation	GO_BiologicalProcess-EBI-UniProt-GOA-ACAP-ARAP_25.05.2022_00h00	2.11125e-05	6.38584e-05	[2, 3]	Group328	5.20769	[2	2		FAM208A	GO:0030879	synaptic vesicle cycle	GO_BiologicalProcess-EBI-UniProt-GOA-ACAP-ARAP_25.05.2022_00h00	1.24118e-11	1.34767e-10	[2, 3, 4]	Group526	5.09474	[2	2		FMR1	GO:0035270	endocrine system development	GO_BiologicalProcess-EBI-UniProt-GOA-ACAP-ARAP_25.05.2022_00h00	3.75732e-05	0.000132951	[7, 8]	Group08	5.43478	[7	6
PALLD	GO:0002682	histone H2A monoubiquitination	GO_BiologicalProcess-EBI-UniProt-GOA-ACAP-ARAP_25.05.2022_00h00	2.11125e-05	6.38584e-05	[2, 3]	Group419	5.20769	[2	2		MOB4	GO:0008306	neuron death	GO_BiologicalProcess-EBI-UniProt-GOA-ACAP-ARAP_25.05.2022_00h00	2.36403e-08	1.2584e-07	[2, 3, 4]	Group490	5.32135	[2	2		TP53I11	GO:0031110	regulation of microtubule polymerization or depolymerization	GO_BiologicalProcess-EBI-UniProt-GOA-ACAP-ARAP_25.05.2022_00h00	3.75732e-05	0.000132951	[7, 8]	Group11	5.43478	[7	6
EXOSC2	GO:0002682	labyrinthine layer morphogenesis	GO_BiologicalProcess-EBI-UniProt-GOA-ACAP-ARAP_25.05.2022_00h00	2.11125e-05	6.38584e-05	[2, 3]	Group482	5.20769	[2	2		TMEM87A	GO:0006631	regulation of calcium ion transmembrane transport	GO_BiologicalProcess-EBI-UniProt-GOA-ACAP-ARAP_25.05.2022_00h00	6.50075e-07	2.54048e-06	[2, 3]	Group526	4.89771	[2	2		DIMT1	GO:1902895	positive regulation of miRNA transcription	GO_BiologicalProcess-EBI-UniProt-GOA-ACAP-ARAP_25.05.2022_00h00	S	0.000132951	[7, 8]	Group12	5.43478	[7	6
H2AFY	GO:0002682	positive regulation of Wnt signaling pathway	GO_BiologicalProcess-EBI-UniProt-GOA-ACAP-ARAP_25.05.2022_00h00	2.11125e-05	6.38584e-05	[2, 3]	Group582	5.20769	[2	2		PACSIN3	GO:0000381	protein methylation	GO_BiologicalProcess-EBI-UniProt-GOA-ACAP-ARAP_25.05.2022_00h00	1.73687e-06	6.11264e-06	[2, 4]	Group422	5.78106	[2	2		ZEB1
AGO4	GO:0002682	regulation of histone methylation	GO_BiologicalProcess-EBI-UniProt-GOA-ACAP-ARAP_25.05.2022_00h00	2.11125e-05	6.38584e-05	[2, 3]	Group369	5.20769	[2	2		DOLPP1	GO:0010827	regulation of dendrite morphogenesis	GO_BiologicalProcess-EBI-UniProt-GOA-ACAP-ARAP_25.05.2022_00h00	1.73687e-06	6.11264e-06	[2, 4]	Group444	5.78106	[2	2		PTPN1
EFEMP2	GO:0002682	regulation of JNK cascade	GO_BiologicalProcess-EBI-UniProt-GOA-ACAP-ARAP_25.05.2022_00h00	2.11125e-05	6.38584e-05	[2, 3]	Group494	5.20769	[2	2		DNMT1	GO:0006635	synaptic vesicle endocytosis	GO_BiologicalProcess-EBI-UniProt-GOA-ACAP-ARAP_25.05.2022_00h00	1.73687e-06	6.11264e-06	[2, 4]	Group527	5.78106	[2	2		TFRC
CLINT1	GO:0002682	response to growth hormone	GO_BiologicalProcess-EBI-UniProt-GOA-ACAP-ARAP_25.05.2022_00h00	2.11125e-05	6.38584e-05	[2, 3]	Group587	5.20769	[2	2		PAX6	GO:0034330	I-kappaB kinase/NF-kappaB signaling	GO_BiologicalProcess-EBI-UniProt-GOA-ACAP-ARAP_25.05.2022_00h00	1.34952e-05	3.90747e-05	[2, 3]	Group526	5.08318	[2	2		MECP2
ERMP1	GO:0045927	protein polyubiquitination	GO_BiologicalProcess-EBI-UniProt-GOA-ACAP-ARAP_25.05.2022_00h00	2.95447e-05	8.61135e-05	[2, 3, 4]	Group543	8.55019	[2	2		CPOX	GO:0150115	myeloid leukocyte activation	GO_BiologicalProcess-EBI-UniProt-GOA-ACAP-ARAP_25.05.2022_00h00	2.09131e-05	5.76694e-05	[2, 4]	Group442	5.23504	[2	2		ACVR1B
PPA2	GO:0035265	positive regulation of reactive oxygen species metabolic process	GO_BiologicalProcess-EBI-UniProt-GOA-ACAP-ARAP_25.05.2022_00h00	3.00904e-05	8.72161e-05	[2, 3]	Group486	9.94475	[2	2		SP1	GO:0140212	negative regulation of transcription, DNA-templated	GO_BiologicalProcess-EBI-UniProt-GOA-ACAP-ARAP_25.05.2022_00h00	0.00023218	0.000497417	[2, 3, 4, 5]	Group102	13.3333	[2	2		GSK3B
NMD3	GO:0035265	skeletal muscle cell differentiation	GO_BiologicalProcess-EBI-UniProt-GOA-ACAP-ARAP_25.05.2022_00h00	3.00904e-05	8.72161e-05	[2, 3]	Group543	9.94475	[2	2		OCIAD2	GO:0071322	positive regulation of telomere maintenance	GO_BiologicalProcess-EBI-UniProt-GOA-ACAP-ARAP_25.05.2022_00h00	0.00896602	0.0127962	[2, 3, 4, 5, 6]	Group102	18.75	[2	2		PTEN
FAM98B	GO:0019827	cellular response to prostaglandin E stimulus	GO_BiologicalProcess-EBI-UniProt-GOA-ACAP-ARAP_25.05.2022_00h00	6.12917e-05	0.000163759	[2, 3]	Group101	9.42408	[2	2		HERC2	GO:0046330	export from cell	GO_BiologicalProcess-EBI-UniProt-GOA-ACAP-ARAP_25.05.2022_00h00	0.0106653	0.0148878	[2, 4]	Group342	4.8951	[2	2		CCDC6
NEU1	GO:0019827	metanephric mesenchyme development	GO_BiologicalProcess-EBI-UniProt-GOA-ACAP-ARAP_25.05.2022_00h00	6.12917e-05	0.000163759	[2, 3]	Group575	9.42408	[2	2		FMN2	GO:0045197	vascular associated smooth muscle cell apoptotic process	GO_BiologicalProcess-EBI-UniProt-GOA-ACAP-ARAP_25.05.2022_00h00	0.0106653	0.0148878	[2, 4]	Group445	4.8951	[2	2		HECTD1
PSEN1	GO:0019827	regulation of inclusion body assembly	GO_BiologicalProcess-EBI-UniProt-GOA-ACAP-ARAP_25.05.2022_00h00	6.12917e-05	0.000163759	[2, 3]	Group162	9.42408	[2	2		CNOT6	GO:0007160	vascular associated smooth muscle cell migration	GO_BiologicalProcess-EBI-UniProt-GOA-ACAP-ARAP_25.05.2022_00h00	0.0106653	0.0148878	[2, 4]	Group457	4.8951	[2	2		STAT3
IER3IP1	GO:0002262	aspartate family amino acid metabolic process	GO_BiologicalProcess-EBI-UniProt-GOA-ACAP-ARAP_25.05.2022_00h00	0.000132657	0.000328725	[2, 5]	Group582	9.18919	[2	2		WDFY1	GO:0051338	vascular associated smooth muscle cell proliferation	GO_BiologicalProcess-EBI-UniProt-GOA-ACAP-ARAP_25.05.2022_00h00	0.0106653	0.0148878	[2, 4]	Group521	4.8951	[2	2		XPA
ASPH	GO:0002262	histone H3-K9 modification	GO_BiologicalProcess-EBI-UniProt-GOA-ACAP-ARAP_25.05.2022_00h00	0.000132657	0.000328725	[2, 5]	Group387	9.18919	[2	2		NRAS	GO:0008104	long-term synaptic potentiation	GO_BiologicalProcess-EBI-UniProt-GOA-ACAP-ARAP_25.05.2022_00h00	0.0316748	0.0393567	[2, 3, 4]	Group155	7.8125	[2	2		FGFRL1
PDPR	GO:0002262	positive regulation of actin filament polymerization	GO_BiologicalProcess-EBI-UniProt-GOA-ACAP-ARAP_25.05.2022_00h00	0.000132657	0.000328725	[2, 5]	Group478	9.18919	[2	2		TRAF3	GO:0044539	neuron projection organization	GO_BiologicalProcess-EBI-UniProt-GOA-ACAP-ARAP_25.05.2022_00h00	0.0375529	0.0457676	[2, 3, 4, 5]	Group527	7.46269	[2	2		CDK10
NUP62	GO:0010941	positive regulation of nitrogen compound metabolic process	GO_BiologicalProcess-EBI-UniProt-GOA-ACAP-ARAP_25.05.2022_00h00	7.95956e-23	1.18484e-20	[3, 4]	Group316	7.86773	[3	3		VMP1	GO:0010557	endodermal cell differentiation	GO_BiologicalProcess-EBI-UniProt-GOA-ACAP-ARAP_25.05.2022_00h00	0.0409602	0.0493226	[2, 3, 4]	Group287	4.3956	[2	2		ARHGAP5
SMURF1	GO:0010941	regulation of metabolic process	GO_BiologicalProcess-EBI-UniProt-GOA-ACAP-ARAP_25.05.2022_00h00	7.95956e-23	1.18484e-20	[3, 4]	Group587	7.86773	[3	3		CACNA2D1	GO:0061337	endomembrane system organization	GO_BiologicalProcess-EBI-UniProt-GOA-ACAP-ARAP_25.05.2022_00h00	0.0409602	0.0493226	[2, 3, 4]	Group407	4.3956	[2	2		GPD1L
XIAP	GO:0031323	cellular response to organic substance	GO_BiologicalProcess-EBI-UniProt-GOA-ACAP-ARAP_25.05.2022_00h00	1.30979e-22	1.81973e-20	[3, 4]	Group510	5.25338	[3	3		ILVBL	GO:0010941	endothelial cell migration	GO_BiologicalProcess-EBI-UniProt-GOA-ACAP-ARAP_25.05.2022_00h00	0.0409602	0.0493226	[2, 3, 4]	Group492	4.3956	[2	2		AIFM3
KIT	GO:0031323	negative regulation of apoptotic process	GO_BiologicalProcess-EBI-UniProt-GOA-ACAP-ARAP_25.05.2022_00h00	1.30979e-22	1.81973e-20	[3, 4]	Group587	5.25338	[3	3		RPRD2	GO:0071900	endothelial tube morphogenesis	GO_BiologicalProcess-EBI-UniProt-GOA-ACAP-ARAP_25.05.2022_00h00	0.0409602	0.0493226	[2, 3, 4]	Group526	4.3956	[2	2		HIF1A
ATG3	GO:0051173	organonitrogen compound metabolic process	GO_BiologicalProcess-EBI-UniProt-GOA-ACAP-ARAP_25.05.2022_00h00	1.01728e-21	1.00953e-19	[3, 4, 5]	Group587	6.21435	[3	3		ING5	GO:0045935	regulation of autophagy of mitochondrion	GO_BiologicalProcess-EBI-UniProt-GOA-ACAP-ARAP_25.05.2022_00h00	1.59987e-25	7.64337e-23	[3, 4]	Group521	5.11769	[3	3		APC
DFFA	GO:0080090	cellular response to endogenous stimulus	GO_BiologicalProcess-EBI-UniProt-GOA-ACAP-ARAP_25.05.2022_00h00	7.56014e-21	6.05974e-19	[3, 4]	Group587	5.11234	[3	3		ELAVL4	GO:0045785	platelet formation	GO_BiologicalProcess-EBI-UniProt-GOA-ACAP-ARAP_25.05.2022_00h00	7.8301e-22	8.80195e-20	[3, 4]	Group525	4.54392	[3			SDHD
TCF12	GO:0080090	regulation of catabolic process	GO_BiologicalProcess-EBI-UniProt-GOA-ACAP-ARAP_25.05.2022_00h00	7.56014e-21	6.05974e-19	[3, 4]	Group510	5.11234	[3	3		ITGB4	GO:0006355	regulation of phosphorylation	GO_BiologicalProcess-EBI-UniProt-GOA-ACAP-ARAP_25.05.2022_00h00	1.8808e-21	1.71153e-19	[3, 4]	Group521	6.01028	[3	3		ITGB1
NOSIP	GO:0010604	cellular catabolic process	GO_BiologicalProcess-EBI-UniProt-GOA-ACAP-ARAP_25.05.2022_00h00	8.45836e-21	6.5286e-19	[3, 4, 5]	Group268	5.93289	[3	3		COL7A1	GO:1904377	cellular component disassembly	GO_BiologicalProcess-EBI-UniProt-GOA-ACAP-ARAP_25.05.2022_00h00	5.16878e-19	2.82215e-17	[3, 4]	Group525	4.3634	[3	3		ALDH5A1
LETM1	GO:0010604	regulation of cell population proliferation	GO_BiologicalProcess-EBI-UniProt-GOA-ACAP-ARAP_25.05.2022_00h00	8.45836e-21	6.5286e-19	[3, 4, 5]	Group510	5.93289	[3	3		TNKS1BP1	GO:0009967	peptidase activator activity	GO_BiologicalProcess-EBI-UniProt-GOA-ACAP-ARAP_25.05.2022_00h00	7.13386e-19	3.49559e-17	[3, 4, 5]	Group486	5.07383	[3	3		CLASP2
PPP2R2A	GO:0010604	regulation of macromolecule metabolic process	GO_BiologicalProcess-EBI-UniProt-GOA-ACAP-ARAP_25.05.2022_00h00	8.45836e-21	6.5286e-19	[3, 4, 5]	Group587	5.93289	[3	3		LRRC8D	GO:0046320	neuroepithelial cell differentiation	GO_BiologicalProcess-EBI-UniProt-GOA-ACAP-ARAP_25.05.2022_00h00	1.80405e-18	8.01753e-17	[3, 4]	Group523	5.13254	[3	3		UBQLN1
OSBPL9	GO:0031325	protein transport	GO_BiologicalProcess-EBI-UniProt-GOA-ACAP-ARAP_25.05.2022_00h00	1.32755e-20	9.54003e-19	[3, 4, 5]	Group587	6.16794	[3	3		ABCE1	GO:0071363	transmembrane transport	GO_BiologicalProcess-EBI-UniProt-GOA-ACAP-ARAP_25.05.2022_00h00	1.80405e-18	8.01753e-17	[3, 4]	Group490	5.13254	[3	3		MDGA1
RAB11FIP2	GO:0060548	intracellular transport	GO_BiologicalProcess-EBI-UniProt-GOA-ACAP-ARAP_25.05.2022_00h00	1.29248e-20	9.61977e-19	[3, 4, 5]	Group587	9.09091	[3	3		UBE2F	GO:0010605	nuclear-transcribed mRNA catabolic process	GO_BiologicalProcess-EBI-UniProt-GOA-ACAP-ARAP_25.05.2022_00h00	3.82741e-18	1.59004e-16	[3, 4]	Group525	4.35657	[3	3		MID1IP1
FOXJ2	GO:0048731	nitrogen compound transport	GO_BiologicalProcess-EBI-UniProt-GOA-ACAP-ARAP_25.05.2022_00h00	1.73028e-20	1.20197e-18	[3, 4]	Group587	5.52796	[3	3		PDGFA	GO:0022402	skeletal muscle tissue development	GO_BiologicalProcess-EBI-UniProt-GOA-ACAP-ARAP_25.05.2022_00h00	1.84325e-17	5.97026e-16	[3, 4, 5]	Group386	5.4371	[3	3		INPP5A
RXRA	GO:0019538	anatomical structure morphogenesis	GO_BiologicalProcess-EBI-UniProt-GOA-ACAP-ARAP_25.05.2022_00h00	3.49996e-20	2.27935e-18	[3, 4]	Group587	5.21167	[3	3		RRM1	GO:0022008	enzyme regulator activity	GO_BiologicalProcess-EBI-UniProt-GOA-ACAP-ARAP_25.05.2022_00h00	6.36241e-17	1.92993e-15	[3, 4]	Group523	6.32839	[3	3		P4HB
DNMT1	GO:0019538	establishment of protein localization	GO_BiologicalProcess-EBI-UniProt-GOA-ACAP-ARAP_25.05.2022_00h00	3.49996e-20	2.27935e-18	[3, 4]	Group510	5.21167	[3	3		DYNC1LI1	GO:0042063	organ growth	GO_BiologicalProcess-EBI-UniProt-GOA-ACAP-ARAP_25.05.2022_00h00	6.36241e-17	1.92993e-15	[3, 4]	Group490	6.32839	[3	3		BNIP3
PRKCI	GO:0019538	regulation of signal transduction	GO_BiologicalProcess-EBI-UniProt-GOA-ACAP-ARAP_25.05.2022_00h00	3.49996e-20	2.27935e-18	[3, 4]	Group322	5.21167	[3	3		EXOC2	GO:0031532	DNA replication	GO_BiologicalProcess-EBI-UniProt-GOA-ACAP-ARAP_25.05.2022_00h00	7.77499e-17	2.28585e-15	[3, 4, 5]	Group525	5.19481	[3	3		CMPK1
MSI2	GO:0051171	cellular component biogenesis	GO_BiologicalProcess-EBI-UniProt-GOA-ACAP-ARAP_25.05.2022_00h00	5.51767e-19	2.94841e-17	[3, 4]	Group587	5.06032	[3	3		UBAC2	GO:0010468	regulation of mononuclear cell migration	GO_BiologicalProcess-EBI-UniProt-GOA-ACAP-ARAP_25.05.2022_00h00	7.77499e-17	2.28585e-15	[3, 4, 5]	Group523	5.19481	[3	3		ZBTB4
UFL1	GO:0051171	regulation of phosphate metabolic process	GO_BiologicalProcess-EBI-UniProt-GOA-ACAP-ARAP_25.05.2022_00h00	5.51767e-19	2.94841e-17	[3, 4]	Group510	5.06032	[3	3		SSR1	GO:0072359	regulation of primary metabolic process	GO_BiologicalProcess-EBI-UniProt-GOA-ACAP-ARAP_25.05.2022_00h00	7.77499e-17	2.28585e-15	[3, 4, 5]	Group490	5.19481	[3	3		NCAM1
KRAS	GO:0009894	neuron death	GO_BiologicalProcess-EBI-UniProt-GOA-ACAP-ARAP_25.05.2022_00h00	6.78125e-19	3.53303e-17	[3, 4]	Group581	8.94231	[3	3		MAP3K7	GO:0120039	regulation of Golgi organization	GO_BiologicalProcess-EBI-UniProt-GOA-ACAP-ARAP_25.05.2022_00h00	1.132e-16	3.13514e-15	[3, 4]	Group525	4.18268	[3	3		DDAH1
CSNK1A1	GO:0009894	positive regulation of signaling	GO_BiologicalProcess-EBI-UniProt-GOA-ACAP-ARAP_25.05.2022_00h00	6.78125e-19	3.53303e-17	[3, 4]	Group503	8.94231	[3	3		PPP1R13B	GO:0051240	pinocytosis	GO_BiologicalProcess-EBI-UniProt-GOA-ACAP-ARAP_25.05.2022_00h00	8.01686e-16	1.89139e-14	[3, 4, 5]	Group490	7.34619	[3	3		ADAR
SHMT2	GO:0042127	positive regulation of protein modification process	GO_BiologicalProcess-EBI-UniProt-GOA-ACAP-ARAP_25.05.2022_00h00	4.52708e-18	2.14419e-16	[3, 4]	Group464	7.22689	[3	3		KMT5A	GO:0009267	negative regulation of catalytic activity	GO_BiologicalProcess-EBI-UniProt-GOA-ACAP-ARAP_25.05.2022_00h00	3.83815e-15	8.33488e-14	[3, 4]	Group126	6.05042	[3	3		CBX1
NSDHL	GO:0042127	regulation of kinase activity	GO_BiologicalProcess-EBI-UniProt-GOA-ACAP-ARAP_25.05.2022_00h00	4.52708e-18	2.14419e-16	[3, 4]	Group587	7.22689	[3	3		MCM3	GO:1904375	positive regulation of cell growth	GO_BiologicalProcess-EBI-UniProt-GOA-ACAP-ARAP_25.05.2022_00h00	1.44925e-14	2.9463e-13	[3, 4]	Group524	7.07804	[3	3		ISCU
CARHSP1	GO:0042127	vasculature development	GO_BiologicalProcess-EBI-UniProt-GOA-ACAP-ARAP_25.05.2022_00h00	4.52708e-18	2.14419e-16	[3, 4]	Group509	7.22689	[3	3		MSH2	GO:1903829	kinase regulator activity	GO_BiologicalProcess-EBI-UniProt-GOA-ACAP-ARAP_25.05.2022_00h00	4.61895e-14	8.73942e-13	[3, 4]	Group435	6.05879	[3	3		LDHA
EIF4E2	GO:0060255	negative regulation of macromolecule metabolic process	GO_BiologicalProcess-EBI-UniProt-GOA-ACAP-ARAP_25.05.2022_00h00	5.34304e-18	2.42063e-16	[3, 4]	Group510	4.89005	[3	3		FLNB	GO:0051246	neuron projection regeneration	GO_BiologicalProcess-EBI-UniProt-GOA-ACAP-ARAP_25.05.2022_00h00	4.61895e-14	8.73942e-13	[3, 4]	Group322	6.05879	[3	3		SH3BGRL
NFYC	GO:0060255	positive regulation of developmental process	GO_BiologicalProcess-EBI-UniProt-GOA-ACAP-ARAP_25.05.2022_00h00	5.34304e-18	2.42063e-16	[3, 4]	Group587	4.89005	[3	3		HYI	GO:0034446	regulation of neuron apoptotic process	GO_BiologicalProcess-EBI-UniProt-GOA-ACAP-ARAP_25.05.2022_00h00	1.17101e-13	2.07203e-12	[3, 4]	Group524	5.41135	[3	3		NPTX1
MORC3	GO:0046907	neurogenesis	GO_BiologicalProcess-EBI-UniProt-GOA-ACAP-ARAP_25.05.2022_00h00	5.88136e-18	2.60782e-16	[3, 4]	Group577	7.3741	[3	3		MAP4K3	GO:0045934	peptidyl-tyrosine phosphorylation	GO_BiologicalProcess-EBI-UniProt-GOA-ACAP-ARAP_25.05.2022_00h00	1.59437e-13	2.67266e-12	[3, 4, 5]	Group233	5.30715	[3	3		STMN1
WDR11	GO:0051128	cellular response to nitrogen compound	GO_BiologicalProcess-EBI-UniProt-GOA-ACAP-ARAP_25.05.2022_00h00	9.15402e-18	3.89326e-16	[3, 4]	Group584	6.40569	[3	3		MTOR	GO:0036211	post-transcriptional regulation of gene expression	GO_BiologicalProcess-EBI-UniProt-GOA-ACAP-ARAP_25.05.2022_00h00	1.59437e-13	2.67266e-12	[3, 4, 5]	Group508	5.30715	[3	3		NDUFA4
PACSIN3	GO:0051128	gene expression	GO_BiologicalProcess-EBI-UniProt-GOA-ACAP-ARAP_25.05.2022_00h00	9.15402e-18	3.89326e-16	[3, 4]	Group396	6.40569	[3	3		TRA2B	GO:0045088	cellular component morphogenesis	GO_BiologicalProcess-EBI-UniProt-GOA-ACAP-ARAP_25.05.2022_00h00	1.78297e-13	2.91218e-12	[3, 4, 5]	Group252	7.93651	[3	3		SCD
SP1	GO:0051128	positive regulation of molecular function	GO_BiologicalProcess-EBI-UniProt-GOA-ACAP-ARAP_25.05.2022_00h00	9.15402e-18	3.89326e-16	[3, 4]	Group587	6.40569	[3	3		ADAM9	GO:0051052	cellular response to stress	GO_BiologicalProcess-EBI-UniProt-GOA-ACAP-ARAP_25.05.2022_00h00	1.97749e-13	3.20253e-12	[3, 4]	Group373	6.23288	[3	3		LDHB
TLE4	GO:0051128	regulation of supramolecular fiber organization	GO_BiologicalProcess-EBI-UniProt-GOA-ACAP-ARAP_25.05.2022_00h00	9.15402e-18	3.89326e-16	[3, 4]	Group365	6.40569	[3	3		LEPROTL1	GO:0035994	regulation of amyloid precursor protein catabolic process	GO_BiologicalProcess-EBI-UniProt-GOA-ACAP-ARAP_25.05.2022_00h00	1.97749e-13	3.20253e-12	[3, 4]	Group523	6.23288	[3	3		EEF1A2
RAB22A	GO:0035556	protein modification process	GO_BiologicalProcess-EBI-UniProt-GOA-ACAP-ARAP_25.05.2022_00h00	3.41706e-17	1.34362e-15	[3, 4, 5]	Group587	6.14783	[3	3		IPO8	GO:0019219	positive regulation of ERK1 and ERK2 cascade	GO_BiologicalProcess-EBI-UniProt-GOA-ACAP-ARAP_25.05.2022_00h00	3.93707e-13	5.97123e-12	[3, 5]	Group465	5.80205	[3	3
FEN1	GO:0009966	cellular component assembly	GO_BiologicalProcess-EBI-UniProt-GOA-ACAP-ARAP_25.05.2022_00h00	4.19101e-17	1.61742e-15	[3, 4, 5]	Group587	5.92335	[3	3		UNC45A	GO:0051656	extrinsic apoptotic signaling pathway in absence of ligand	GO_BiologicalProcess-EBI-UniProt-GOA-ACAP-ARAP_25.05.2022_00h00	5.64742e-13	8.23833e-12	[3, 4, 5]	Group403	5.71115	[3	3
GRPEL1	GO:0009966	regulation of neuron apoptotic process	GO_BiologicalProcess-EBI-UniProt-GOA-ACAP-ARAP_25.05.2022_00h00	4.19101e-17	1.61742e-15	[3, 4, 5]	Group578	5.92335	[3	3		CSNK2A2	GO:0070997	regulation of gene expression, epigenetic	GO_BiologicalProcess-EBI-UniProt-GOA-ACAP-ARAP_25.05.2022_00h00	5.64742e-13	8.23833e-12	[3, 4, 5]	Group523	5.71115	[3	3
TPP2	GO:0009966	tube development	GO_BiologicalProcess-EBI-UniProt-GOA-ACAP-ARAP_25.05.2022_00h00	4.19101e-17	1.61742e-15	[3, 4, 5]	Group551	5.92335	[3	3		CEBPB	GO:0007264	regulation of protein modification process	GO_BiologicalProcess-EBI-UniProt-GOA-ACAP-ARAP_25.05.2022_00h00	1.76421e-12	2.26269e-11	[3, 4]	Group439	6.80729	[3	3
SECISBP2	GO:0045184	regulation of cytoskeleton organization	GO_BiologicalProcess-EBI-UniProt-GOA-ACAP-ARAP_25.05.2022_00h00	6.73983e-17	2.55378e-15	[3, 5]	Group577	7.11035	[3	3		MTX1	GO:0071495	peptidyl-amino acid modification	GO_BiologicalProcess-EBI-UniProt-GOA-ACAP-ARAP_25.05.2022_00h00	4.23923e-12	5.12732e-11	[3, 4]	Group512	6.73077	[3	3
VPS18	GO:0031324	cellular biosynthetic process	GO_BiologicalProcess-EBI-UniProt-GOA-ACAP-ARAP_25.05.2022_00h00	3.20534e-16	1.04374e-14	[3, 4, 5]	Group587	6.35186	[3	3		KIF2A	GO:0006468	cellular response to organic substance	GO_BiologicalProcess-EBI-UniProt-GOA-ACAP-ARAP_25.05.2022_00h00	1.68254e-11	1.73802e-10	[3, 4, 5]	Group233	4.99405	[3	3
CCDC43	GO:0010646	positive regulation of cell differentiation	GO_BiologicalProcess-EBI-UniProt-GOA-ACAP-ARAP_25.05.2022_00h00	4.57894e-16	1.44583e-14	[3, 4]	Group551	5.64016	[3	3		RRBP1	GO:0006355	positive regulation of transferase activity	GO_BiologicalProcess-EBI-UniProt-GOA-ACAP-ARAP_25.05.2022_00h00	1.68254e-11	1.73802e-10	[3, 4, 5]	Group508	4.99405	[3	3
MAP3K9	GO:0010646	regulation of cellular localization	GO_BiologicalProcess-EBI-UniProt-GOA-ACAP-ARAP_25.05.2022_00h00	4.57894e-16	1.44583e-14	[3, 4]	Group578	5.64016	[3	3		SEPT6	GO:0051338	regulation of epithelial cell differentiation	GO_BiologicalProcess-EBI-UniProt-GOA-ACAP-ARAP_25.05.2022_00h00	1.83649e-08	9.94203e-08	[3, 4, 5]	Group512	7.38007	[3	3
Adamts1	GO:0010646	regulation of protein kinase activity	GO_BiologicalProcess-EBI-UniProt-GOA-ACAP-ARAP_25.05.2022_00h00	4.57894e-16	1.44583e-14	[3, 4]	Group587	5.64016	[3	3		DDT	GO:1902806	regulation of cell death	GO_BiologicalProcess-EBI-UniProt-GOA-ACAP-ARAP_25.05.2022_00h00	4.4243e-08	2.26065e-07	[3, 4]	Group249	5.63258	[3	3
SFRP1	GO:0044260	enzyme-linked receptor protein signaling pathway	GO_BiologicalProcess-EBI-UniProt-GOA-ACAP-ARAP_25.05.2022_00h00	3.16443e-15	8.6772e-14	[3, 4]	Group571	5.66207	[3	3		JARID2	GO:0048468	tissue development	GO_BiologicalProcess-EBI-UniProt-GOA-ACAP-ARAP_25.05.2022_00h00	4.4243e-08	2.26065e-07	[3, 4]	Group427	5.63258	[3	3
PATJ	GO:0044260	gliogenesis	GO_BiologicalProcess-EBI-UniProt-GOA-ACAP-ARAP_25.05.2022_00h00	3.16443e-15	8.6772e-14	[3, 4]	Group492	5.66207	[3	3		ATG4C	GO:0003012	cellular response to alcohol	GO_BiologicalProcess-EBI-UniProt-GOA-ACAP-ARAP_25.05.2022_00h00	1.17095e-07	5.36615e-07	[3, 4, 5]	Group525	4.64058	[3	3
WDFY1	GO:0044260	macromolecule biosynthetic process	GO_BiologicalProcess-EBI-UniProt-GOA-ACAP-ARAP_25.05.2022_00h00	3.16443e-15	8.6772e-14	[3, 4]	Group581	5.66207	[3	3		MRPS27	GO:0045860	cellular response to radiation	GO_BiologicalProcess-EBI-UniProt-GOA-ACAP-ARAP_25.05.2022_00h00	1.19062e-07	5.44324e-07	[3, 4, 5, 6]	Group520	9.63855	[3	3
ATG2B	GO:0044260	nucleic acid metabolic process	GO_BiologicalProcess-EBI-UniProt-GOA-ACAP-ARAP_25.05.2022_00h00	3.16443e-15	8.6772e-14	[3, 4]	Group510	5.66207	[3	3		GAK	GO:1901653	negative regulation of cell migration involved in sprouting angiogenesis	GO_BiologicalProcess-EBI-UniProt-GOA-ACAP-ARAP_25.05.2022_00h00	1.19062e-07	5.44324e-07	[3, 4, 5, 6]	Group523	9.63855	[3	3
NRAS	GO:0044260	positive regulation of catabolic process	GO_BiologicalProcess-EBI-UniProt-GOA-ACAP-ARAP_25.05.2022_00h00	3.16443e-15	8.6772e-14	[3, 4]	Group322	5.66207	[3	3		PAXBP1	GO:1904705	blood vessel morphogenesis	GO_BiologicalProcess-EBI-UniProt-GOA-ACAP-ARAP_25.05.2022_00h00	1.39779e-07	6.31486e-07	[3, 4, 5]	Group490	4.28525	[3	3
TIMM50	GO:0044260	positive regulation of cytoskeleton organization	GO_BiologicalProcess-EBI-UniProt-GOA-ACAP-ARAP_25.05.2022_00h00	3.16443e-15	8.6772e-14	[3, 4]	Group561	5.66207	[3	3		SUGP1	GO:0000398	negative regulation of ion transport	GO_BiologicalProcess-EBI-UniProt-GOA-ACAP-ARAP_25.05.2022_00h00	1.39779e-07	6.31486e-07	[3, 4, 5]	Group523	4.28525	[3	3
LRRC40	GO:0030036	phosphorylation	GO_BiologicalProcess-EBI-UniProt-GOA-ACAP-ARAP_25.05.2022_00h00	3.73351e-15	1.01047e-13	[3, 6]	Group584	9.18499	[3	3		DPY19L1	GO:0022607	regulation of triglyceride biosynthetic process	GO_BiologicalProcess-EBI-UniProt-GOA-ACAP-ARAP_25.05.2022_00h00	1.39779e-07	6.31486e-07	[3, 4, 5]	Group397	4.28525	[3	3
NUPL2	GO:0030036	regulation of protein stability	GO_BiologicalProcess-EBI-UniProt-GOA-ACAP-ARAP_25.05.2022_00h00	3.73351e-15	1.01047e-13	[3, 6]	Group283	9.18499	[3	3		ASH2L	GO:0007399	mitotic cell cycle phase transition	GO_BiologicalProcess-EBI-UniProt-GOA-ACAP-ARAP_25.05.2022_00h00	2.0556e-07	8.9076e-07	[3, 4]	Group238	5.6696	[3	3
TMX3	GO:0010605	placenta development	GO_BiologicalProcess-EBI-UniProt-GOA-ACAP-ARAP_25.05.2022_00h00	8.82211e-15	2.13782e-13	[3, 4, 5]	Group587	5.84016	[3	3		FERMT2	GO:1903034	regulation of high voltage-gated calcium channel activity	GO_BiologicalProcess-EBI-UniProt-GOA-ACAP-ARAP_25.05.2022_00h00	2.0556e-07	8.9076e-07	[3, 4]	Group351	5.6696	[3	3
ANTXR1	GO:0010605	regulation of nucleobase-containing compound metabolic process	GO_BiologicalProcess-EBI-UniProt-GOA-ACAP-ARAP_25.05.2022_00h00	8.82211e-15	2.13782e-13	[3, 4, 5]	Group269	5.84016	[3	3		CASP3	GO:0032879	regulation of body fluid levels	GO_BiologicalProcess-EBI-UniProt-GOA-ACAP-ARAP_25.05.2022_00h00	2.26378e-07	9.74343e-07	[3, 4, 5, 6]	Group483	7.24638	[3	3
CCNT2	GO:0009889	negative regulation of cell population proliferation	GO_BiologicalProcess-EBI-UniProt-GOA-ACAP-ARAP_25.05.2022_00h00	1.20246e-14	2.72384e-13	[3, 4]	Group587	5.20691	[3	3		NIFK	GO:0009150	cell-cell adhesion	GO_BiologicalProcess-EBI-UniProt-GOA-ACAP-ARAP_25.05.2022_00h00	4.94272e-07	1.98436e-06	[3, 6, 7, 8, 9, 10, 11, 12, 13]	Group179	7.25275	[3	3
SMAD7	GO:0035239	negative regulation of neuron death	GO_BiologicalProcess-EBI-UniProt-GOA-ACAP-ARAP_25.05.2022_00h00	1.22848e-14	2.75285e-13	[3, 4, 5]	Group476	8.46906	[3	3		CCDC22	GO:0006996	endoplasmic reticulum unfolded protein response	GO_BiologicalProcess-EBI-UniProt-GOA-ACAP-ARAP_25.05.2022_00h00	4.94272e-07	1.98436e-06	[3, 6, 7, 8, 9, 10, 11, 12, 13]	Group377	7.25275	[3	3
PCNT	GO:0035239	regulation of cellular component biogenesis	GO_BiologicalProcess-EBI-UniProt-GOA-ACAP-ARAP_25.05.2022_00h00	1.22848e-14	2.75285e-13	[3, 4, 5]	Group587	8.46906	[3	3		ATP13A1	GO:0060429	negative regulation of calcium ion transport	GO_BiologicalProcess-EBI-UniProt-GOA-ACAP-ARAP_25.05.2022_00h00	4.94272e-07	1.98436e-06	[3, 6, 7, 8, 9, 10, 11, 12, 13]	Group335	7.25275	[3	3
AIFM1	GO:0010647	nucleobase-containing compound metabolic process	GO_BiologicalProcess-EBI-UniProt-GOA-ACAP-ARAP_25.05.2022_00h00	1.53423e-14	3.13464e-13	[3, 4, 5]	Group390	6.69962	[3	3		RIOK3	GO:0051092	regulation of fat cell differentiation	GO_BiologicalProcess-EBI-UniProt-GOA-ACAP-ARAP_25.05.2022_00h00	7.7646e-07	2.99761e-06	[3, 4, 5]	Group515	6.87623	[3	3
TNKS1BP1	GO:0010647	positive regulation of protein phosphorylation	GO_BiologicalProcess-EBI-UniProt-GOA-ACAP-ARAP_25.05.2022_00h00	1.53423e-14	3.13464e-13	[3, 4, 5]	Group587	6.69962	[3	3		AKT1	GO:0034614	regulation of proteolysis involved in protein catabolic process	GO_BiologicalProcess-EBI-UniProt-GOA-ACAP-ARAP_25.05.2022_00h00	7.89007e-07	3.03991e-06	[3, 4, 5]	Group126	6.00522	[3	3
NR3C1	GO:0010647	supramolecular fiber organization	GO_BiologicalProcess-EBI-UniProt-GOA-ACAP-ARAP_25.05.2022_00h00	1.53423e-14	3.13464e-13	[3, 4, 5]	Group578	6.69962	[3	3		SIAH2	GO:0045321	protein autophosphorylation	GO_BiologicalProcess-EBI-UniProt-GOA-ACAP-ARAP_25.05.2022_00h00	8.53931e-07	3.25721e-06	[3, 5]	Group491	8.41751	[3	3
MUS81	GO:0035295	negative regulation of cellular biosynthetic process	GO_BiologicalProcess-EBI-UniProt-GOA-ACAP-ARAP_25.05.2022_00h00	1.7774e-14	3.56164e-13	[3, 4]	Group587	7.79896	[3	3		SRSF10	GO:0003714	leukocyte migration	GO_BiologicalProcess-EBI-UniProt-GOA-ACAP-ARAP_25.05.2022_00h00	1.7301e-06	6.10004e-06	[3, 4, 5]	Group490	6.24025	[3	3
ITGB4	GO:0035295	transport	GO_BiologicalProcess-EBI-UniProt-GOA-ACAP-ARAP_25.05.2022_00h00	1.7774e-14	3.56164e-13	[3, 4]	Group464	7.79896	[3	3		PIGS	GO:0000302	regulation of cellular component size	GO_BiologicalProcess-EBI-UniProt-GOA-ACAP-ARAP_25.05.2022_00h00	2.02477e-06	7.03516e-06	[3, 4, 5, 6, 7]	Group461	8.24742	[3	3
PALD1	GO:0051130	cellular macromolecule catabolic process	GO_BiologicalProcess-EBI-UniProt-GOA-ACAP-ARAP_25.05.2022_00h00	2.40592e-14	4.64253e-13	[3, 4, 5]	Group587	7.86618	[3	3		CSTF3	GO:0021543	regulation of organic acid transport	GO_BiologicalProcess-EBI-UniProt-GOA-ACAP-ARAP_25.05.2022_00h00	2.03181e-06	7.04681e-06	[3, 4]	Group367	8.48709	[3	3
CPNE3	GO:0051130	head development	GO_BiologicalProcess-EBI-UniProt-GOA-ACAP-ARAP_25.05.2022_00h00	2.40592e-14	4.64253e-13	[3, 4, 5]	Group584	7.86618	[3	3		PXN	GO:0002521	negative regulation of cation transmembrane transport	GO_BiologicalProcess-EBI-UniProt-GOA-ACAP-ARAP_25.05.2022_00h00	2.20193e-06	7.6092e-06	[3, 4, 5]	Group444	6.2701	[3	3
AMOT	GO:0001568	regulation of MAPK cascade	GO_BiologicalProcess-EBI-UniProt-GOA-ACAP-ARAP_25.05.2022_00h00	2.82203e-14	5.251e-13	[3, 5, 6, 7]	Group476	9.06667	[3	3		USP1	GO:0051128	proton transmembrane transporter activity	GO_BiologicalProcess-EBI-UniProt-GOA-ACAP-ARAP_25.05.2022_00h00	2.20193e-06	7.6092e-06	[3, 4, 5]	Group523	6.2701	[3	3
TBRG1	GO:0001568	tissue morphogenesis	GO_BiologicalProcess-EBI-UniProt-GOA-ACAP-ARAP_25.05.2022_00h00	2.82203e-14	5.251e-13	[3, 5, 6, 7]	Group587	9.06667	[3	3		LIN7C	GO:0009887	secretion by cell	GO_BiologicalProcess-EBI-UniProt-GOA-ACAP-ARAP_25.05.2022_00h00	2.20193e-06	7.6092e-06	[3, 4, 5]	Group527	6.2701	[3	3
PPM1F	GO:0006914	negative regulation of macromolecule biosynthetic process	GO_BiologicalProcess-EBI-UniProt-GOA-ACAP-ARAP_25.05.2022_00h00	7.2808e-14	1.26443e-12	[3, 4]	Group581	9.86395	[3	3		ORC3	GO:0023051	regulation of hemopoiesis	GO_BiologicalProcess-EBI-UniProt-GOA-ACAP-ARAP_25.05.2022_00h00	2.48743e-06	8.51877e-06	[3, 4, 5]	Group401	6.5666	[3	3
CUX1	GO:0006914	regulation of actin filament organization	GO_BiologicalProcess-EBI-UniProt-GOA-ACAP-ARAP_25.05.2022_00h00	7.2808e-14	1.26443e-12	[3, 4]	Group503	9.86395	[3	3		MPDU1	GO:0010604	regulation of intrinsic apoptotic signaling pathway	GO_BiologicalProcess-EBI-UniProt-GOA-ACAP-ARAP_25.05.2022_00h00	2.48743e-06	8.51877e-06	[3, 4, 5]	Group516	6.5666	[3	3
TCF4	GO:0009967	organic cyclic compound metabolic process	GO_BiologicalProcess-EBI-UniProt-GOA-ACAP-ARAP_25.05.2022_00h00	1.11643e-13	1.87632e-12	[3, 4, 5, 6]	Group587	6.82657	[3	3		BRPF3	GO:0071479	negative regulation of histone modification	GO_BiologicalProcess-EBI-UniProt-GOA-ACAP-ARAP_25.05.2022_00h00	3.19148e-06	1.06624e-05	[3, 4]	Group249	6.06509	[3	3
MTHFD1	GO:0051172	heterocycle biosynthetic process	GO_BiologicalProcess-EBI-UniProt-GOA-ACAP-ARAP_25.05.2022_00h00	1.3931e-13	2.32257e-12	[3, 4, 5]	Group587	5.9453	[3	3		ESYT1	GO:0009611	positive regulation of protein tyrosine kinase activity	GO_BiologicalProcess-EBI-UniProt-GOA-ACAP-ARAP_25.05.2022_00h00	3.19148e-06	1.06624e-05	[3, 4]	Group527	6.06509	[3	3
EXOC2	GO:0051172	positive regulation of programmed cell death	GO_BiologicalProcess-EBI-UniProt-GOA-ACAP-ARAP_25.05.2022_00h00	1.3931e-13	2.32257e-12	[3, 4, 5]	Group269	5.9453	[3	3		BCCIP	GO:2000026	response to glucose	GO_BiologicalProcess-EBI-UniProt-GOA-ACAP-ARAP_25.05.2022_00h00	3.19148e-06	1.06624e-05	[3, 4]	Group516	6.06509	[3	3
FLT1	GO:0045597	establishment of protein localization to organelle	GO_BiologicalProcess-EBI-UniProt-GOA-ACAP-ARAP_25.05.2022_00h00	4.03362e-13	6.27319e-12	[3, 4, 5]	Group582	8.10811	[3	3		BAG4	GO:0050793	lymphocyte activation	GO_BiologicalProcess-EBI-UniProt-GOA-ACAP-ARAP_25.05.2022_00h00	6.44239e-06	2.00511e-05	[3, 5, 6, 7, 8]	Group500	12.381	[3	3
MAVS	GO:0045597	macroautophagy	GO_BiologicalProcess-EBI-UniProt-GOA-ACAP-ARAP_25.05.2022_00h00	4.03362e-13	6.27319e-12	[3, 4, 5]	Group419	8.10811	[3	3		CDKN1A	GO:0070887	heterochromatin organization	GO_BiologicalProcess-EBI-UniProt-GOA-ACAP-ARAP_25.05.2022_00h00	3.08175e-05	8.23669e-05	[3, 4, 5, 6, 7, 8]	Group520	7.1875	[3	3
PNPT1	GO:0045597	positive regulation of kinase activity	GO_BiologicalProcess-EBI-UniProt-GOA-ACAP-ARAP_25.05.2022_00h00	4.03362e-13	6.27319e-12	[3, 4, 5]	Group515	8.10811	[3	3		EBP	GO:0048583	histone acetylation	GO_BiologicalProcess-EBI-UniProt-GOA-ACAP-ARAP_25.05.2022_00h00	3.28217e-05	8.73569e-05	[3, 4]	Group221	8.67347	[3	3
SKIV2L2	GO:0045597	regulation of RNA biosynthetic process	GO_BiologicalProcess-EBI-UniProt-GOA-ACAP-ARAP_25.05.2022_00h00	4.03362e-13	6.27319e-12	[3, 4, 5]	Group587	8.10811	[3	3		SPRED1	GO:0050793	positive regulation of neuron death	GO_BiologicalProcess-EBI-UniProt-GOA-ACAP-ARAP_25.05.2022_00h00	3.28217e-05	8.73569e-05	[3, 4]	Group474	8.67347	[3	3
MSH2	GO:0060341	regulation of proteolysis involved in protein catabolic process	GO_BiologicalProcess-EBI-UniProt-GOA-ACAP-ARAP_25.05.2022_00h00	4.14512e-13	6.39884e-12	[3, 4]	Group577	7.82014	[3	3		EPHA4	GO:0043276	regulation of protein neddylation	GO_BiologicalProcess-EBI-UniProt-GOA-ACAP-ARAP_25.05.2022_00h00	3.29118e-05	8.74749e-05	[3, 5, 6]	Group464	11.4286	[3	3
MTOR	GO:0060674	fatty acid metabolic process	GO_BiologicalProcess-EBI-UniProt-GOA-ACAP-ARAP_25.05.2022_00h00	1.72142e-08	1.01055e-07	[3, 4, 5, 6, 7, 8]	Group534	29.7297	[3	3		DROSHA	GO:0001953	response to unfolded protein	GO_BiologicalProcess-EBI-UniProt-GOA-ACAP-ARAP_25.05.2022_00h00	3.29118e-05	8.74749e-05	[3, 5, 6]	Group328	11.4286	[3	3
DNM2	GO:0044089	positive regulation of cyclin-dependent protein kinase activity	GO_BiologicalProcess-EBI-UniProt-GOA-ACAP-ARAP_25.05.2022_00h00	2.13452e-08	1.22882e-07	[3, 4, 5]	Group538	8.25516	[3	3		CEBPZ	GO:2000641	regulation of keratinocyte migration	GO_BiologicalProcess-EBI-UniProt-GOA-ACAP-ARAP_25.05.2022_00h00	3.74035e-05	9.80496e-05	[3, 4, 5]	Group521	7.09877	[3	3
CTGF	GO:0044089	positive regulation of protein modification by small protein conjugation or removal	GO_BiologicalProcess-EBI-UniProt-GOA-ACAP-ARAP_25.05.2022_00h00	2.13452e-08	1.22882e-07	[3, 4, 5]	Group584	8.25516	[3	3		PDGFRB	GO:2001251	negative regulation of cellular catabolic process	GO_BiologicalProcess-EBI-UniProt-GOA-ACAP-ARAP_25.05.2022_00h00	4.04242e-05	0.000105103	[3, 4, 5, 6, 7, 8, 10, 11, 12]	Group237	20	[3	3
MRPL4	GO:1903829	cell-cell junction assembly	GO_BiologicalProcess-EBI-UniProt-GOA-ACAP-ARAP_25.05.2022_00h00	3.02194e-08	1.71134e-07	[3, 4, 5, 6]	Group577	8.48861	[3	3		KLF15	GO:0090304	long-chain fatty acid import into cell	GO_BiologicalProcess-EBI-UniProt-GOA-ACAP-ARAP_25.05.2022_00h00	4.16931e-05	0.000107962	[3, 4]	Group319	5.76606	[3	3
FLNB	GO:0022603	aorta morphogenesis	GO_BiologicalProcess-EBI-UniProt-GOA-ACAP-ARAP_25.05.2022_00h00	3.461e-08	1.94413e-07	[3, 4]	Group587	6.70732	[3	3		AGRN	GO:0010717	response to manganese ion	GO_BiologicalProcess-EBI-UniProt-GOA-ACAP-ARAP_25.05.2022_00h00	4.16931e-05	0.000107962	[3, 4]	Group527	5.76606	[3	3
WWC1	GO:0022603	negative regulation of intrinsic apoptotic signaling pathway	GO_BiologicalProcess-EBI-UniProt-GOA-ACAP-ARAP_25.05.2022_00h00	3.461e-08	1.94413e-07	[3, 4]	Group214	6.70732	[3	3		PRKCE	GO:0010243	positive regulation of catalytic activity	GO_BiologicalProcess-EBI-UniProt-GOA-ACAP-ARAP_25.05.2022_00h00	5.25573e-05	0.00013356	[3, 5]	Group251	7.11974	[3	3
SSSCA1	GO:0022603	regulation of protein localization to cell periphery	GO_BiologicalProcess-EBI-UniProt-GOA-ACAP-ARAP_25.05.2022_00h00	3.461e-08	1.94413e-07	[3, 4]	Group476	6.70732	[3	3		IPO9	GO:0051248	maintenance of protein localization in organelle	GO_BiologicalProcess-EBI-UniProt-GOA-ACAP-ARAP_25.05.2022_00h00	5.31357e-05	0.000134671	[3, 4]	Group510	6.77966	[3	3
BRMS1	GO:0007166	cartilage development	GO_BiologicalProcess-EBI-UniProt-GOA-ACAP-ARAP_25.05.2022_00h00	3.71783e-08	2.08279e-07	[3, 4, 5]	Group587	5.00491	[3	3		CNST	GO:0030154	negative regulation of macroautophagy	GO_BiologicalProcess-EBI-UniProt-GOA-ACAP-ARAP_25.05.2022_00h00	5.31357e-05	0.000134671	[3, 4]	Group475	6.77966	[3	3
CEBPB	GO:0007166	epidermal growth factor receptor activity	GO_BiologicalProcess-EBI-UniProt-GOA-ACAP-ARAP_25.05.2022_00h00	3.71783e-08	2.08279e-07	[3, 4, 5]	Group390	5.00491	[3	3		PTBP1	GO:0051252	metal ion homeostasis	GO_BiologicalProcess-EBI-UniProt-GOA-ACAP-ARAP_25.05.2022_00h00	6.13887e-05	0.000152951	[3, 4, 5, 7, 8, 9, 10]	Group417	8.60215	[3	3
IPO8	GO:0007166	establishment of apical/basal cell polarity	GO_BiologicalProcess-EBI-UniProt-GOA-ACAP-ARAP_25.05.2022_00h00	3.71783e-08	2.08279e-07	[3, 4, 5]	Group414	5.00491	[3	3		GPD2	GO:0032990	regulation of macroautophagy	GO_BiologicalProcess-EBI-UniProt-GOA-ACAP-ARAP_25.05.2022_00h00	7.25514e-05	0.000176844	[3, 4]	Group295	6.68449	[3	3
MAPK14	GO:0007166	positive regulation of I-kappaB kinase/NF-kappaB signaling	GO_BiologicalProcess-EBI-UniProt-GOA-ACAP-ARAP_25.05.2022_00h00	3.71783e-08	2.08279e-07	[3, 4, 5]	Group574	5.00491	[3	3		PRKAG1	GO:0007264	positive regulation of cation channel activity	GO_BiologicalProcess-EBI-UniProt-GOA-ACAP-ARAP_25.05.2022_00h00	7.82555e-05	0.000188821	[3, 4]	Group524	6.76471	[3	3
JARID2	GO:0007166	response to cadmium ion	GO_BiologicalProcess-EBI-UniProt-GOA-ACAP-ARAP_25.05.2022_00h00	3.71783e-08	2.08279e-07	[3, 4, 5]	Group551	5.00491	[3	3		DCTPP1	GO:0046649	pre-miRNA processing	GO_BiologicalProcess-EBI-UniProt-GOA-ACAP-ARAP_25.05.2022_00h00	9.3555e-05	0.000222368	[3, 4, 5]	Group442	5.6701	[3	3
HSD17B12	GO:0007166	signal transduction in response to DNA damage	GO_BiologicalProcess-EBI-UniProt-GOA-ACAP-ARAP_25.05.2022_00h00	3.71783e-08	2.08279e-07	[3, 4, 5]	Group578	5.00491	[3	3		LONP2	GO:0031954	regulation of substrate adhesion-dependent cell spreading	GO_BiologicalProcess-EBI-UniProt-GOA-ACAP-ARAP_25.05.2022_00h00	9.3555e-05	0.000222368	[3, 4, 5]	Group404	5.6701	[3	3
SACM1L	GO:0010564	negative regulation of cellular macromolecule biosynthetic process	GO_BiologicalProcess-EBI-UniProt-GOA-ACAP-ARAP_25.05.2022_00h00	8.6318e-08	4.44165e-07	[3, 4, 5]	Group514	7.19041	[3	3		UBR5	GO:0062012	cellular response to insulin stimulus	GO_BiologicalProcess-EBI-UniProt-GOA-ACAP-ARAP_25.05.2022_00h00	0.000107543	0.000252786	[3, 4]	Group521	4.77454	[3	3
SEC24B	GO:0010564	nuclear export	GO_BiologicalProcess-EBI-UniProt-GOA-ACAP-ARAP_25.05.2022_00h00	8.6318e-08	4.44165e-07	[3, 4, 5]	Group585	7.19041	[3	3		PRMT5	GO:0044248	fatty acid oxidation	GO_BiologicalProcess-EBI-UniProt-GOA-ACAP-ARAP_25.05.2022_00h00	0.000107543	0.000252786	[3, 4]	Group188	4.77454	[3	3
SSX2IP	GO:0031668	negative regulation of oxidative stress-induced neuron death	GO_BiologicalProcess-EBI-UniProt-GOA-ACAP-ARAP_25.05.2022_00h00	1.1129e-05	3.63525e-05	[3, 4]	Group412	8.85609	[3	3		G6PD	GO:1900025	protein dephosphorylation	GO_BiologicalProcess-EBI-UniProt-GOA-ACAP-ARAP_25.05.2022_00h00	0.000107543	0.000252786	[3, 4]	Group427	4.77454	[3	3
LSM3	GO:0051090	cell junction disassembly	GO_BiologicalProcess-EBI-UniProt-GOA-ACAP-ARAP_25.05.2022_00h00	1.14214e-05	3.71328e-05	[3, 6, 7, 8, 9, 10, 11, 12, 13]	Group110	7.47253	[3	3		SLC16A1	GO:0045184	fibroblast migration	GO_BiologicalProcess-EBI-UniProt-GOA-ACAP-ARAP_25.05.2022_00h00	0.000118402	0.000274595	[3, 4, 5]	Group287	6.90789	[3	3
TXNRD1	GO:0051090	fatty acid oxidation	GO_BiologicalProcess-EBI-UniProt-GOA-ACAP-ARAP_25.05.2022_00h00	1.14214e-05	3.71328e-05	[3, 6, 7, 8, 9, 10, 11, 12, 13]	Group224	7.47253	[3	3		TRIM26	GO:0015800	fatty acid metabolic process	GO_BiologicalProcess-EBI-UniProt-GOA-ACAP-ARAP_25.05.2022_00h00	0.000127829	0.000292551	[3, 4, 5, 6]	Group189	11.6279	[3	3
CYR61	GO:0051090	insulin receptor signaling pathway	GO_BiologicalProcess-EBI-UniProt-GOA-ACAP-ARAP_25.05.2022_00h00	1.14214e-05	3.71328e-05	[3, 6, 7, 8, 9, 10, 11, 12, 13]	Group587	7.47253	[3	3		ZNF207	GO:0001932	positive regulation of T cell activation	GO_BiologicalProcess-EBI-UniProt-GOA-ACAP-ARAP_25.05.2022_00h00	0.000166625	0.000370686	[3, 4, 5]	Group288	8.24176	[3	3
UBR4	GO:0021537	early endosome to Golgi transport	GO_BiologicalProcess-EBI-UniProt-GOA-ACAP-ARAP_25.05.2022_00h00	1.18372e-05	3.83056e-05	[3, 4, 6, 7, 8, 9]	Group439	8.82353	[3	3		UBE2I	GO:0070301	positive regulation of cytoskeleton organization	GO_BiologicalProcess-EBI-UniProt-GOA-ACAP-ARAP_25.05.2022_00h00	0.00474687	0.00728616	[3, 6, 7, 8]	Group513	10.5263	[3	3
PAXBP1	GO:0021537	macrophage proliferation	GO_BiologicalProcess-EBI-UniProt-GOA-ACAP-ARAP_25.05.2022_00h00	1.18372e-05	3.83056e-05	[3, 4, 6, 7, 8, 9]	Group529	8.82353	[3	3		EXOC3	GO:0051050	positive regulation of DNA binding	GO_BiologicalProcess-EBI-UniProt-GOA-ACAP-ARAP_25.05.2022_00h00	0.00474687	0.00728616	[3, 6, 7, 8]	Group527	10.5263	[3	3
MRPS27	GO:0021537	negative regulation of developmental growth	GO_BiologicalProcess-EBI-UniProt-GOA-ACAP-ARAP_25.05.2022_00h00	1.18372e-05	3.83056e-05	[3, 4, 6, 7, 8, 9]	Group278	8.82353	[3	3		ARID1A	GO:1905564	regulation of growth	GO_BiologicalProcess-EBI-UniProt-GOA-ACAP-ARAP_25.05.2022_00h00	0.00486937	0.00745622	[3, 6]	Group084	23.0769	[3	3
CNOT9	GO:0001666	centromeric sister chromatid cohesion	GO_BiologicalProcess-EBI-UniProt-GOA-ACAP-ARAP_25.05.2022_00h00	1.20805e-05	3.89717e-05	[3, 5]	Group560	8.41424	[3	3		FNDC3A	GO:0051128	tissue morphogenesis	GO_BiologicalProcess-EBI-UniProt-GOA-ACAP-ARAP_25.05.2022_00h00	0.00501351	0.00765853	[3, 4, 5, 6, 7, 8, 9]	Group520	7.24638	[3	3
ATL2	GO:0051962	negative regulation of amyloid fibril formation	GO_BiologicalProcess-EBI-UniProt-GOA-ACAP-ARAP_25.05.2022_00h00	1.2413e-05	3.9798e-05	[3, 4, 5, 6, 7]	Group487	8.59107	[3	3		P3H3	GO:0006260	establishment of protein localization to mitochondrion	GO_BiologicalProcess-EBI-UniProt-GOA-ACAP-ARAP_25.05.2022_00h00	0.00532902	0.00808235	[3, 4]	Group524	5.95238	[3	3
CCDC82	GO:0051962	regulation of glial cell apoptotic process	GO_BiologicalProcess-EBI-UniProt-GOA-ACAP-ARAP_25.05.2022_00h00	1.2413e-05	3.9798e-05	[3, 4, 5, 6, 7]	Group515	8.59107	[3	3		XBP1	GO:1990778	negative regulation of organelle organization	GO_BiologicalProcess-EBI-UniProt-GOA-ACAP-ARAP_25.05.2022_00h00	0.00534651	0.00810244	[3, 4]	Group237	9.09091	[3	3
SLC7A1	GO:0051962	regulation of transcription from RNA polymerase II promoter in response to oxidative stress	GO_BiologicalProcess-EBI-UniProt-GOA-ACAP-ARAP_25.05.2022_00h00	1.2413e-05	3.9798e-05	[3, 4, 5, 6, 7]	Group587	8.59107	[3	3		SFXN1	GO:0048666	response to steroid hormone	GO_BiologicalProcess-EBI-UniProt-GOA-ACAP-ARAP_25.05.2022_00h00	0.00862979	0.0123532	[3, 4, 7, 8, 10, 11, 12]	Group515	7.61905	[3	3
SEL1L	GO:0021543	dendritic cell differentiation	GO_BiologicalProcess-EBI-UniProt-GOA-ACAP-ARAP_25.05.2022_00h00	1.24522e-05	3.98623e-05	[3, 4, 5, 7, 8, 9, 10]	Group287	10.2151	[3	3		BAG5	GO:0016477	establishment of cell polarity	GO_BiologicalProcess-EBI-UniProt-GOA-ACAP-ARAP_25.05.2022_00h00	0.00875471	0.0125226	[3, 4, 5, 6, 7, 8, 9]	Group491	6.35838	[3	3
RCN2	GO:0021543	regulation of cellular respiration	GO_BiologicalProcess-EBI-UniProt-GOA-ACAP-ARAP_25.05.2022_00h00	1.24522e-05	3.98623e-05	[3, 4, 5, 7, 8, 9, 10]	Group529	10.2151	[3	3		ACP2	GO:0010604	response to wounding	GO_BiologicalProcess-EBI-UniProt-GOA-ACAP-ARAP_25.05.2022_00h00	0.00875471	0.0125226	[3, 4, 5, 6, 7, 8, 9]	Group232	6.35838	[3	3
MYO10	GO:0021543	regulation of centrosome duplication	GO_BiologicalProcess-EBI-UniProt-GOA-ACAP-ARAP_25.05.2022_00h00	1.24522e-05	3.98623e-05	[3, 4, 5, 7, 8, 9, 10]	Group439	10.2151	[3	3		MAN1B1	GO:0030838	response to interleukin-1	GO_BiologicalProcess-EBI-UniProt-GOA-ACAP-ARAP_25.05.2022_00h00	0.0103727	0.0145325	[3, 5, 6, 7]	Group441	8.95522	[3	3
DNAJC19	GO:0090287	leukocyte proliferation	GO_BiologicalProcess-EBI-UniProt-GOA-ACAP-ARAP_25.05.2022_00h00	1.61183e-05	5.02852e-05	[3, 4, 6]	Group583	8.10811	[3	3		STXBP3	GO:0007595	transcription, DNA-templated	GO_BiologicalProcess-EBI-UniProt-GOA-ACAP-ARAP_25.05.2022_00h00	0.0106966	0.0149098	[3, 6, 7]	Group518	7.33945	[3	3
AKT1	GO:0090287	presynapse organization	GO_BiologicalProcess-EBI-UniProt-GOA-ACAP-ARAP_25.05.2022_00h00	1.61183e-05	5.02852e-05	[3, 4, 6]	Group574	8.10811	[3	3		RELA	GO:0016482	transmembrane receptor protein serine/threonine kinase signaling pathway	GO_BiologicalProcess-EBI-UniProt-GOA-ACAP-ARAP_25.05.2022_00h00	0.0106966	0.0149098	[3, 6, 7]	Group527	7.33945	[3	3
TM7SF2	GO:0003170	cellular response to alcohol	GO_BiologicalProcess-EBI-UniProt-GOA-ACAP-ARAP_25.05.2022_00h00	1.62955e-05	5.07621e-05	[3, 5, 6, 7]	Group583	15.7143	[3	3		PHLPP1	GO:0007519	response to hepatocyte growth factor	GO_BiologicalProcess-EBI-UniProt-GOA-ACAP-ARAP_25.05.2022_00h00	0.0130242	0.01774	[3, 4, 5, 6, 7]	Group190	9.80392	[3	3
XPC	GO:0003170	negative regulation of angiogenesis	GO_BiologicalProcess-EBI-UniProt-GOA-ACAP-ARAP_25.05.2022_00h00	1.62955e-05	5.07621e-05	[3, 5, 6, 7]	Group579	15.7143	[3	3		FZD7	GO:0030217	leukocyte activation involved in immune response	GO_BiologicalProcess-EBI-UniProt-GOA-ACAP-ARAP_25.05.2022_00h00	0.0145935	0.0196395	[3, 4]	Group035	15.7895	[3	3
NOB1	GO:0016358	fatty acid elongation	GO_BiologicalProcess-EBI-UniProt-GOA-ACAP-ARAP_25.05.2022_00h00	1.82831e-05	5.63639e-05	[3, 6, 7, 9, 10, 11]	Group587	8.81226	[3	3		CAND1	GO:0048145	regulation of cell shape	GO_BiologicalProcess-EBI-UniProt-GOA-ACAP-ARAP_25.05.2022_00h00	0.0145935	0.0196395	[3, 4, 5]	Group527	15.7895	[3	3
UBE2J2	GO:0016358	JUN kinase kinase kinase activity	GO_BiologicalProcess-EBI-UniProt-GOA-ACAP-ARAP_25.05.2022_00h00	1.82831e-05	5.63639e-05	[3, 6, 7, 9, 10, 11]	Group303	8.81226	[3	3		ARMC10	GO:0044772	positive regulation of protein kinase activity	GO_BiologicalProcess-EBI-UniProt-GOA-ACAP-ARAP_25.05.2022_00h00	0.0152166	0.0204637	[3, 4, 5]	Group411	9.43396	[3	3
RAPGEF2	GO:0016358	positive regulation of dendritic cell cytokine production	GO_BiologicalProcess-EBI-UniProt-GOA-ACAP-ARAP_25.05.2022_00h00	1.82831e-05	5.63639e-05	[3, 6, 7, 9, 10, 11]	Group506	8.81226	[3	3		FUBP3	GO:0046686	positive regulation of biosynthetic process	GO_BiologicalProcess-EBI-UniProt-GOA-ACAP-ARAP_25.05.2022_00h00	0.0152888	0.0205464	[3, 4, 5, 6, 7, 8]	Group244	11.4286	[3	3
UAP1	GO:0016358	regulation of epithelial cell proliferation involved in prostate gland development	GO_BiologicalProcess-EBI-UniProt-GOA-ACAP-ARAP_25.05.2022_00h00	1.82831e-05	5.63639e-05	[3, 6, 7, 9, 10, 11]	Group443	8.81226	[3	3		RRP36	GO:1901362	animal organ morphogenesis	GO_BiologicalProcess-EBI-UniProt-GOA-ACAP-ARAP_25.05.2022_00h00	0.0158746	0.0212589	[3, 4, 5, 6]	Group527	6.09756	[3	3
ATP13A1	GO:0016358	response to L-glutamate	GO_BiologicalProcess-EBI-UniProt-GOA-ACAP-ARAP_25.05.2022_00h00	1.82831e-05	5.63639e-05	[3, 6, 7, 9, 10, 11]	Group393	8.81226	[3	3		BLVRB	GO:2001022	cellular response to molecule of bacterial origin	GO_BiologicalProcess-EBI-UniProt-GOA-ACAP-ARAP_25.05.2022_00h00	0.0163998	0.0219161	[3, 5, 6]	Group408	9.25926	[3	3
MRS2	GO:0016358	response to vitamin E	GO_BiologicalProcess-EBI-UniProt-GOA-ACAP-ARAP_25.05.2022_00h00	1.82831e-05	5.63639e-05	[3, 6, 7, 9, 10, 11]	Group522	8.81226	[3	3		TPM1	GO:0031334	regulation of extent of cell growth	GO_BiologicalProcess-EBI-UniProt-GOA-ACAP-ARAP_25.05.2022_00h00	0.0178976	0.0237351	[3, 4]	Group155	6.29371	[3	3
CASP3	GO:1905114	cellular response to fibroblast growth factor stimulus	GO_BiologicalProcess-EBI-UniProt-GOA-ACAP-ARAP_25.05.2022_00h00	3.02439e-05	8.75392e-05	[3, 4, 5, 6]	Group390	6.4759	[3	3		FTSJ1	GO:0034728	negative regulation of cellular process	GO_BiologicalProcess-EBI-UniProt-GOA-ACAP-ARAP_25.05.2022_00h00	0.0179105	0.0237358	[3, 4, 5]	Group488	7.2165	[3	3
SAP30L	GO:1905114	positive regulation of secretion	GO_BiologicalProcess-EBI-UniProt-GOA-ACAP-ARAP_25.05.2022_00h00	3.02439e-05	8.75392e-05	[3, 4, 5, 6]	Group575	6.4759	[3	3		MYO18A	GO:0032868	regulation of fibroblast proliferation	GO_BiologicalProcess-EBI-UniProt-GOA-ACAP-ARAP_25.05.2022_00h00	0.0179105	0.0237358	[3, 4, 5]	Group380	7.2165	[3	3
CNNM3	GO:0090398	liver development	GO_BiologicalProcess-EBI-UniProt-GOA-ACAP-ARAP_25.05.2022_00h00	3.23775e-05	9.31972e-05	[3, 4]	Group485	12.6214	[3	3		PTPN1	GO:0050982	regulation of DNA-templated transcription in response to stress	GO_BiologicalProcess-EBI-UniProt-GOA-ACAP-ARAP_25.05.2022_00h00	0.0202084	0.0263786	[3, 4]	Group074	10.5263	[3	3
ABCG2	GO:0031641	apoptotic nuclear changes	GO_BiologicalProcess-EBI-UniProt-GOA-ACAP-ARAP_25.05.2022_00h00	3.70897e-05	0.000105739	[3, 4, 5, 6, 7, 8, 9]	Group166	17.6471	[3	3		GNA13	GO:0043542	regulation of long-chain fatty acid import into cell	GO_BiologicalProcess-EBI-UniProt-GOA-ACAP-ARAP_25.05.2022_00h00	0.0205692	0.0267946	[3, 4]	Group288	4.11985	[3	3
PXN	GO:0031641	membrane assembly	GO_BiologicalProcess-EBI-UniProt-GOA-ACAP-ARAP_25.05.2022_00h00	3.70897e-05	0.000105739	[3, 4, 5, 6, 7, 8, 9]	Group515	17.6471	[3	3		TBCD	GO:1905564	positive regulation of endocytosis	GO_BiologicalProcess-EBI-UniProt-GOA-ACAP-ARAP_25.05.2022_00h00	0.0205672	0.0268104	[3, 4]	Group419	4	[3	3
BRPF3	GO:0031641	negative regulation of epidermal growth factor receptor signaling pathway	GO_BiologicalProcess-EBI-UniProt-GOA-ACAP-ARAP_25.05.2022_00h00	3.70897e-05	0.000105739	[3, 4, 5, 6, 7, 8, 9]	Group504	17.6471	[3	3		GPHN	GO:0010595	positive regulation of endopeptidase activity	GO_BiologicalProcess-EBI-UniProt-GOA-ACAP-ARAP_25.05.2022_00h00	0.0205672	0.0268104	[3, 4]	Group506	4	[3	3
EXOC7	GO:0031641	regulation of androgen receptor signaling pathway	GO_BiologicalProcess-EBI-UniProt-GOA-ACAP-ARAP_25.05.2022_00h00	3.70897e-05	0.000105739	[3, 4, 5, 6, 7, 8, 9]	Group442	17.6471	[3	3		EFNA1	GO:0018193	regulation of lymphocyte apoptotic process	GO_BiologicalProcess-EBI-UniProt-GOA-ACAP-ARAP_25.05.2022_00h00	0.0205672	0.0268104	[3, 4]	Group526	4	[3	3
LIN7C	GO:0031641	response to hyperoxia	GO_BiologicalProcess-EBI-UniProt-GOA-ACAP-ARAP_25.05.2022_00h00	3.70897e-05	0.000105739	[3, 4, 5, 6, 7, 8, 9]	Group358	17.6471	[3	3		SYNE1	GO:0050900	negative regulation of mRNA splicing, via spliceosome	GO_BiologicalProcess-EBI-UniProt-GOA-ACAP-ARAP_25.05.2022_00h00	0.021429	0.027782	[3, 4]	Group526	5.09554	[3	3
TGM2	GO:0036473	positive regulation of tumor necrosis factor production	GO_BiologicalProcess-EBI-UniProt-GOA-ACAP-ARAP_25.05.2022_00h00	3.97764e-05	0.000112323	[3, 5, 6]	Group572	12.381	[3	3		RASA1	GO:0070849	negative regulation of binding	GO_BiologicalProcess-EBI-UniProt-GOA-ACAP-ARAP_25.05.2022_00h00	0.02169	0.0280824	[3, 4, 5]	Group112	4.94506	[3	3
VHL	GO:0036473	regulation of phosphatidylinositol 3-kinase activity	GO_BiologicalProcess-EBI-UniProt-GOA-ACAP-ARAP_25.05.2022_00h00	3.97764e-05	0.000112323	[3, 5, 6]	Group395	12.381	[3	3		ACTN1	GO:0033044	regulation of transcription, DNA-templated	GO_BiologicalProcess-EBI-UniProt-GOA-ACAP-ARAP_25.05.2022_00h00	0.02299	0.0295851	[3, 4, 5, 6]	Group345	4.55487	[3	3
XRCC1	GO:0036473	telomerase activity	GO_BiologicalProcess-EBI-UniProt-GOA-ACAP-ARAP_25.05.2022_00h00	3.97764e-05	0.000112323	[3, 5, 6]	Group560	12.381	[3	3		DPY30	GO:0050767	regulation of transmembrane transport	GO_BiologicalProcess-EBI-UniProt-GOA-ACAP-ARAP_25.05.2022_00h00	0.02299	0.0295851	[3, 4, 5, 6]	Group526	4.55487	[3	3
CDC27	GO:0048598	regulation of dendritic spine development	GO_BiologicalProcess-EBI-UniProt-GOA-ACAP-ARAP_25.05.2022_00h00	4.72144e-05	0.000131193	[3, 4, 5]	Group534	6.37329	[3	3		WDR26	GO:0043502	positive regulation of macromolecule metabolic process	GO_BiologicalProcess-EBI-UniProt-GOA-ACAP-ARAP_25.05.2022_00h00	0.0232149	0.0298343	[3, 4, 5, 6, 7, 8]	Group380	7.5	[3	3
CDKN1A	GO:0048598	response to organophosphorus	GO_BiologicalProcess-EBI-UniProt-GOA-ACAP-ARAP_25.05.2022_00h00	4.72144e-05	0.000131193	[3, 4, 5]	Group469	6.37329	[3	3		POGK	GO:0002682	regulation of organelle organization	GO_BiologicalProcess-EBI-UniProt-GOA-ACAP-ARAP_25.05.2022_00h00	0.0232149	0.0298343	[3, 4, 5, 6, 7, 8]	Group488	7.5	[3	3
EFNB2	GO:0048598	response to other organism	GO_BiologicalProcess-EBI-UniProt-GOA-ACAP-ARAP_25.05.2022_00h00	4.72144e-05	0.000131193	[3, 4, 5]	Group208	6.37329	[3	3		HMGCR	GO:0046887	positive regulation of angiogenesis	GO_BiologicalProcess-EBI-UniProt-GOA-ACAP-ARAP_25.05.2022_00h00	0.0232596	0.0298517	[3, 4, 5]	Group419	4.41176	[3	3
BMPR2	GO:0048598	telomere maintenance	GO_BiologicalProcess-EBI-UniProt-GOA-ACAP-ARAP_25.05.2022_00h00	4.72144e-05	0.000131193	[3, 4, 5]	Group587	6.37329	[3	3		SYMPK	GO:0070228	positive regulation of ATP-dependent activity	GO_BiologicalProcess-EBI-UniProt-GOA-ACAP-ARAP_25.05.2022_00h00	0.0232596	0.0298517	[3, 4, 5]	Group506	4.41176	[3	3
PDGFRB	GO:0048598	vesicle-mediated transport in synapse	GO_BiologicalProcess-EBI-UniProt-GOA-ACAP-ARAP_25.05.2022_00h00	4.72144e-05	0.000131193	[3, 4, 5]	Group583	6.37329	[3	3		HADH	GO:0030163	vesicle docking involved in exocytosis	GO_BiologicalProcess-EBI-UniProt-GOA-ACAP-ARAP_25.05.2022_00h00	0.0232596	0.0298517	[3, 4, 5]	Group526	4.41176	[3	3
MLH1	GO:0042594	hair follicle maturation	GO_BiologicalProcess-EBI-UniProt-GOA-ACAP-ARAP_25.05.2022_00h00	5.2638e-05	0.000144339	[3, 5]	Group412	8.92857	[3	3		PPP4R3A	GO:0055082	positive regulation of NIK/NF-kappaB signaling	GO_BiologicalProcess-EBI-UniProt-GOA-ACAP-ARAP_25.05.2022_00h00	0.0239706	0.0307023	[3, 5]	Group009	10	[3	3
PELI1	GO:0070167	mammary gland epithelial cell proliferation	GO_BiologicalProcess-EBI-UniProt-GOA-ACAP-ARAP_25.05.2022_00h00	5.9097e-05	0.000158914	[3, 4, 5]	Group326	11.9266	[3	3		CCND2	GO:0071363	cardiac neural crest cell development involved in heart development	GO_BiologicalProcess-EBI-UniProt-GOA-ACAP-ARAP_25.05.2022_00h00	0.0275435	0.034789	[3, 5, 6, 7, 8]	Group503	12.5	[3	3
VEZF1	GO:0070167	negative regulation of protein binding	GO_BiologicalProcess-EBI-UniProt-GOA-ACAP-ARAP_25.05.2022_00h00	5.9097e-05	0.000158914	[3, 4, 5]	Group583	11.9266	[3	3		MEF2A	GO:0010975	negative regulation of epithelial to mesenchymal transition	GO_BiologicalProcess-EBI-UniProt-GOA-ACAP-ARAP_25.05.2022_00h00	0.0275435	0.034789	[3, 5, 6, 7, 8]	Group424	12.5	[3	3
ECI1	GO:0044255	telomere maintenance via recombination	GO_BiologicalProcess-EBI-UniProt-GOA-ACAP-ARAP_25.05.2022_00h00	6.71317e-05	0.000178447	[3, 4]	Group580	5.49159	[3	3		IRS2	GO:0051129	positive regulation of transcription by RNA polymerase I	GO_BiologicalProcess-EBI-UniProt-GOA-ACAP-ARAP_25.05.2022_00h00	0.0275435	0.034789	[3, 5, 6, 7, 8]	Group471	12.5	[3	3
NES	GO:0048638	chemokine production	GO_BiologicalProcess-EBI-UniProt-GOA-ACAP-ARAP_25.05.2022_00h00	7.26184e-05	0.000191082	[3, 4]	Group350	7.64706	[3	3		INPPL1	GO:0032516	protein localization to membrane	GO_BiologicalProcess-EBI-UniProt-GOA-ACAP-ARAP_25.05.2022_00h00	0.0275435	0.034789	[3, 4, 5, 6, 7, 8, 9, 10]	Group477	12.5	[3	3
TPRKB	GO:0048638	regulation of chemokine production	GO_BiologicalProcess-EBI-UniProt-GOA-ACAP-ARAP_25.05.2022_00h00	7.26184e-05	0.000191082	[3, 4]	Group543	7.64706	[3	3		MTDH	GO:0099536	regulation of localization	GO_BiologicalProcess-EBI-UniProt-GOA-ACAP-ARAP_25.05.2022_00h00	0.0275435	0.034789	[3, 5, 6, 7, 8]	Group347	12.5	[3	3
AGRN	GO:0048167	apical junction assembly	GO_BiologicalProcess-EBI-UniProt-GOA-ACAP-ARAP_25.05.2022_00h00	7.64397e-05	0.000200883	[3, 5, 6, 7, 8, 9]	Group488	8.96226	[3	3		CUL4B	GO:0051893	autophagosome maturation	GO_BiologicalProcess-EBI-UniProt-GOA-ACAP-ARAP_25.05.2022_00h00	0.0286021	0.0359596	[3, 4]	Group454	5.08475	[3	3
SAMHD1	GO:0048167	positive regulation of DNA biosynthetic process	GO_BiologicalProcess-EBI-UniProt-GOA-ACAP-ARAP_25.05.2022_00h00	7.64397e-05	0.000200883	[3, 5, 6, 7, 8, 9]	Group506	8.96226	[3	3		SLC29A1	GO:1905475	regulation of hydrolase activity	GO_BiologicalProcess-EBI-UniProt-GOA-ACAP-ARAP_25.05.2022_00h00	0.029848	0.0373785	[3, 4]	Group102	5.39216	[3	3
WNT10B	GO:0048167	regulation of lymphocyte differentiation	GO_BiologicalProcess-EBI-UniProt-GOA-ACAP-ARAP_25.05.2022_00h00	7.64397e-05	0.000200883	[3, 5, 6, 7, 8, 9]	Group522	8.96226	[3	3		FADS1	GO:0006259	programmed cell death	GO_BiologicalProcess-EBI-UniProt-GOA-ACAP-ARAP_25.05.2022_00h00	0.0306742	0.0381878	[3, 4]	Group068	12	[3	3
UPF2	GO:0048167	smoothened signaling pathway	GO_BiologicalProcess-EBI-UniProt-GOA-ACAP-ARAP_25.05.2022_00h00	7.64397e-05	0.000200883	[3, 5, 6, 7, 8, 9]	Group587	8.96226	[3	3		DDX50	GO:0097192	regulation of synaptic transmission, GABAergic	GO_BiologicalProcess-EBI-UniProt-GOA-ACAP-ARAP_25.05.2022_00h00	0.0351249	0.0431386	[3, 4, 5]	Group454	8.88889	[3	3
LONP2	GO:0045787	mRNA transcription by RNA polymerase II	GO_BiologicalProcess-EBI-UniProt-GOA-ACAP-ARAP_25.05.2022_00h00	7.70431e-05	0.000202214	[3, 4, 5]	Group585	7.43802	[3	3		DHX15	GO:0006974	regulation of system process	GO_BiologicalProcess-EBI-UniProt-GOA-ACAP-ARAP_25.05.2022_00h00	0.0351249	0.0431386	[3, 4, 5]	Group498	8.88889	[3	3
ROCK2	GO:0014009	activation of protein kinase activity	GO_BiologicalProcess-EBI-UniProt-GOA-ACAP-ARAP_25.05.2022_00h00	9.20578e-05	0.000235976	[3, 6, 7, 8]	Group576	15.7895	[3	3		ANKRD17	GO:0010628	regulation of telomere maintenance via telomere lengthening	GO_BiologicalProcess-EBI-UniProt-GOA-ACAP-ARAP_25.05.2022_00h00	0.0351249	0.0431386	[3, 4, 5]	Group503	8.88889	[3	3
SHC1	GO:0014009	positive regulation of substrate adhesion-dependent cell spreading	GO_BiologicalProcess-EBI-UniProt-GOA-ACAP-ARAP_25.05.2022_00h00	9.20578e-05	0.000235976	[3, 6, 7, 8]	Group515	15.7895	[3	3		PIK3R3	GO:0042325	regulation of transcription regulatory region DNA binding	GO_BiologicalProcess-EBI-UniProt-GOA-ACAP-ARAP_25.05.2022_00h00	0.0351249	0.0431386	[3, 4, 5]	Group513	8.88889	[3	3
CPEB4	GO:0034101	positive regulation of phosphatidylinositol 3-kinase activity	GO_BiologicalProcess-EBI-UniProt-GOA-ACAP-ARAP_25.05.2022_00h00	0.000109674	0.000276372	[3, 6]	Group582	10.1351	[3	3		PTEN	GO:0009314	cellular response to ionizing radiation	GO_BiologicalProcess-EBI-UniProt-GOA-ACAP-ARAP_25.05.2022_00h00	0.0360662	0.0441245	[3, 4, 7]	Group526	5.33333	[3	3
ZNF248	GO:0034101	regulation of calcium ion import	GO_BiologicalProcess-EBI-UniProt-GOA-ACAP-ARAP_25.05.2022_00h00	0.000109674	0.000276372	[3, 6]	Group478	10.1351	[3	3		HACD2	GO:0097581	cytokine production	GO_BiologicalProcess-EBI-UniProt-GOA-ACAP-ARAP_25.05.2022_00h00	0.0392815	0.0475408	[3, 4]	Group527	5.01792	[3	3
NSA2	GO:0034101	regulation of cellular carbohydrate metabolic process	GO_BiologicalProcess-EBI-UniProt-GOA-ACAP-ARAP_25.05.2022_00h00	0.000109674	0.000276372	[3, 6]	Group387	10.1351	[3	3		IRF2BPL	GO:0051171	endocytosis	GO_BiologicalProcess-EBI-UniProt-GOA-ACAP-ARAP_25.05.2022_00h00	0.0402988	0.0485874	[3, 4, 5]	Group069	8.51064	[3	3
EXOC3	GO:0001893	cell cycle checkpoint signaling	GO_BiologicalProcess-EBI-UniProt-GOA-ACAP-ARAP_25.05.2022_00h00	0.000119953	0.000300098	[3, 4, 5, 6, 7, 8]	Group534	20	[3	3		APEH	GO:0014070	regulation of mitochondrion organization	GO_BiologicalProcess-EBI-UniProt-GOA-ACAP-ARAP_25.05.2022_00h00	0.0411318	0.049498	[3, 5]	Group194	10.7143	[3	3
ZNF207	GO:0150093	glycerophospholipid metabolic process	GO_BiologicalProcess-EBI-UniProt-GOA-ACAP-ARAP_25.05.2022_00h00	0.000127075	0.000316775	[3, 6]	Group329	44.4444	[3	3		POLRMT	GO:0007015	JNK cascade	GO_BiologicalProcess-EBI-UniProt-GOA-ACAP-ARAP_25.05.2022_00h00	1.03318e-23	2.19379e-21	[3]	Group486	5.69207	[3]	3
CAT	GO:0150093	negative regulation of leukocyte differentiation	GO_BiologicalProcess-EBI-UniProt-GOA-ACAP-ARAP_25.05.2022_00h00	0.000127075	0.000316775	[3, 6]	Group559	44.4444	[3	3		IMPDH1	GO:0016358	positive regulation of synaptic transmission	GO_BiologicalProcess-EBI-UniProt-GOA-ACAP-ARAP_25.05.2022_00h00	1.03318e-23	2.19379e-21	[3]	Group523	5.69207	[3]	3
STAG2	GO:0150093	positive regulation of protein export from nucleus	GO_BiologicalProcess-EBI-UniProt-GOA-ACAP-ARAP_25.05.2022_00h00	0.000127075	0.000316775	[3, 6]	Group179	44.4444	[3	3		SEC16A	GO:0031344	regulation of canonical Wnt signaling pathway	GO_BiologicalProcess-EBI-UniProt-GOA-ACAP-ARAP_25.05.2022_00h00	9.76115e-23	1.69578e-20	[3]	Group523	5.64086	[3]	3
FAM3A	GO:0150093	positive regulation of response to external stimulus	GO_BiologicalProcess-EBI-UniProt-GOA-ACAP-ARAP_25.05.2022_00h00	0.000127075	0.000316775	[3, 6]	Group533	44.4444	[3	3		TELO2	GO:0021543	cellular response to lipid	GO_BiologicalProcess-EBI-UniProt-GOA-ACAP-ARAP_25.05.2022_00h00	1.17368e-22	1.86909e-20	[3]	Group144	6.57958	[3]	3
SPTLC1	GO:1903828	gonad development	GO_BiologicalProcess-EBI-UniProt-GOA-ACAP-ARAP_25.05.2022_00h00	0.000134112	0.000331542	[3, 4, 5, 6]	Group169	8.86699	[3	3		CCDC6	GO:0030154	dephosphorylation	GO_BiologicalProcess-EBI-UniProt-GOA-ACAP-ARAP_25.05.2022_00h00	1.17368e-22	1.86909e-20	[3]	Group373	6.57958	[3]	3
M6PR	GO:0090068	ectoderm development	GO_BiologicalProcess-EBI-UniProt-GOA-ACAP-ARAP_25.05.2022_00h00	0.000137723	0.000339261	[3, 4, 5, 6]	Group585	8.10811	[3	3		EPN2	GO:0051649	negative regulation of stem cell differentiation	GO_BiologicalProcess-EBI-UniProt-GOA-ACAP-ARAP_25.05.2022_00h00	1.17368e-22	1.86909e-20	[3]	Group433	6.57958	[3]	3
P3H3	GO:0035148	positive regulation of protein dephosphorylation	GO_BiologicalProcess-EBI-UniProt-GOA-ACAP-ARAP_25.05.2022_00h00	0.00014666	0.000357055	[3, 4, 5, 6]	Group587	9.46746	[3	3		SREBF1	GO:0071310	body fluid secretion	GO_BiologicalProcess-EBI-UniProt-GOA-ACAP-ARAP_25.05.2022_00h00	5.48812e-20	3.74564e-18	[3]	Group459	4.30528	[3]	3
AP1G1	GO:0010033	negative regulation of cellular process	GO_BiologicalProcess-EBI-UniProt-GOA-ACAP-ARAP_25.05.2022_00h00	2.5235e-25	1.75299e-22	[3]	Group578	6.58101	[3]	3		AKT2	GO:1901701	cell differentiation	GO_BiologicalProcess-EBI-UniProt-GOA-ACAP-ARAP_25.05.2022_00h00	6.53425e-19	3.37485e-17	[3]	Group521	4.80575	[3]	3
ASB6	GO:0010033	regulation of programmed cell death	GO_BiologicalProcess-EBI-UniProt-GOA-ACAP-ARAP_25.05.2022_00h00	2.5235e-25	1.75299e-22	[3]	Group587	6.58101	[3]	3		CHL1	GO:0006914	negative regulation of protein serine/threonine kinase activity	GO_BiologicalProcess-EBI-UniProt-GOA-ACAP-ARAP_25.05.2022_00h00	6.53425e-19	3.37485e-17	[3]	Group525	4.80575	[3]	3
MYT1	GO:0012501	cellular response to chemical stimulus	GO_BiologicalProcess-EBI-UniProt-GOA-ACAP-ARAP_25.05.2022_00h00	7.91516e-25	2.0619e-22	[3]	Group587	7.60038	[3]	3		CBX5	GO:0048193	transcription coactivator activity	GO_BiologicalProcess-EBI-UniProt-GOA-ACAP-ARAP_25.05.2022_00h00	6.53425e-19	3.37485e-17	[3]	Group524	4.80575	[3]	3
NFATC2IP	GO:0070887	positive regulation of metabolic process	GO_BiologicalProcess-EBI-UniProt-GOA-ACAP-ARAP_25.05.2022_00h00	2.60073e-23	4.51659e-21	[3]	Group587	6.40746	[3]	3		YTHDF2	GO:0045595	early endosome to late endosome transport	GO_BiologicalProcess-EBI-UniProt-GOA-ACAP-ARAP_25.05.2022_00h00	6.75895e-19	3.39904e-17	[3]	Group490	6.16635	[3]	3
LUC7L2	GO:0070887	regulation of cellular metabolic process	GO_BiologicalProcess-EBI-UniProt-GOA-ACAP-ARAP_25.05.2022_00h00	2.60073e-23	4.51659e-21	[3]	Group578	6.40746	[3]	3		SMARCD1	GO:0071900	muscle cell development	GO_BiologicalProcess-EBI-UniProt-GOA-ACAP-ARAP_25.05.2022_00h00	6.75895e-19	3.39904e-17	[3]	Group386	6.16635	[3]	3
BAG5	GO:0016043	cellular macromolecule localization	GO_BiologicalProcess-EBI-UniProt-GOA-ACAP-ARAP_25.05.2022_00h00	2.41162e-23	4.56892e-21	[3]	Group365	5.10312	[3]	3		CIT	GO:1902531	G0 to G1 transition	GO_BiologicalProcess-EBI-UniProt-GOA-ACAP-ARAP_25.05.2022_00h00	2.90285e-18	1.26076e-16	[3]	Group388	5.01193	[3]	3
DAG1	GO:0016043	organelle organization	GO_BiologicalProcess-EBI-UniProt-GOA-ACAP-ARAP_25.05.2022_00h00	2.41162e-23	4.56892e-21	[3]	Group584	5.10312	[3]	3		STAT3	GO:0042994	positive regulation of protein localization to membrane	GO_BiologicalProcess-EBI-UniProt-GOA-ACAP-ARAP_25.05.2022_00h00	2.90285e-18	1.26076e-16	[3]	Group524	5.01193	[3]	3
TRIO	GO:0070727	positive regulation of cellular metabolic process	GO_BiologicalProcess-EBI-UniProt-GOA-ACAP-ARAP_25.05.2022_00h00	1.98409e-22	2.43226e-20	[3]	Group577	6.80246	[3]	3		FRG1	GO:0048666	regulation of protein catabolic process	GO_BiologicalProcess-EBI-UniProt-GOA-ACAP-ARAP_25.05.2022_00h00	2.90285e-18	1.26076e-16	[3]	Group486	5.01193	[3]	3
FZD7	GO:0033554	establishment of localization in cell	GO_BiologicalProcess-EBI-UniProt-GOA-ACAP-ARAP_25.05.2022_00h00	2.02467e-20	1.3611e-18	[3]	Group369	7.16014	[3]	3		HSD17B11	GO:1903076	wound healing	GO_BiologicalProcess-EBI-UniProt-GOA-ACAP-ARAP_25.05.2022_00h00	4.92415e-18	2.00214e-16	[3]	Group423	6.44068	[3]	3
PDXDC1	GO:0033554	intracellular signal transduction	GO_BiologicalProcess-EBI-UniProt-GOA-ACAP-ARAP_25.05.2022_00h00	2.02467e-20	1.3611e-18	[3]	Group561	7.16014	[3]	3		CDH2	GO:0070371	activation of adenylate cyclase activity	GO_BiologicalProcess-EBI-UniProt-GOA-ACAP-ARAP_25.05.2022_00h00	2.56227e-17	8.02705e-16	[3]	Group351	4.59268	[3]	3
ADI1	GO:0033554	regulation of catalytic activity	GO_BiologicalProcess-EBI-UniProt-GOA-ACAP-ARAP_25.05.2022_00h00	2.02467e-20	1.3611e-18	[3]	Group492	7.16014	[3]	3		ZEB2	GO:0043254	growth hormone receptor signaling pathway	GO_BiologicalProcess-EBI-UniProt-GOA-ACAP-ARAP_25.05.2022_00h00	2.56227e-17	8.02705e-16	[3]	Group520	4.59268	[3]	3
WBP1L	GO:0033554	regulation of cellular component organization	GO_BiologicalProcess-EBI-UniProt-GOA-ACAP-ARAP_25.05.2022_00h00	2.02467e-20	1.3611e-18	[3]	Group204	7.16014	[3]	3		TRIB2	GO:0051726	positive regulation of autophagy of mitochondrion in response to mitochondrial depolarization	GO_BiologicalProcess-EBI-UniProt-GOA-ACAP-ARAP_25.05.2022_00h00	5.97864e-16	1.44622e-14	[3]	Group524	6.41913	[3]	3
FUBP3	GO:1901564	negative regulation of metabolic process	GO_BiologicalProcess-EBI-UniProt-GOA-ACAP-ARAP_25.05.2022_00h00	8.74061e-20	5.51983e-18	[3]	Group587	4.93569	[3]	3		PTPRF	GO:0071702	telomere maintenance via telomere lengthening	GO_BiologicalProcess-EBI-UniProt-GOA-ACAP-ARAP_25.05.2022_00h00	5.97864e-16	1.44622e-14	[3]	Group459	6.41913	[3]	3
VPS4B	GO:1901564	regulation of phosphorylation	GO_BiologicalProcess-EBI-UniProt-GOA-ACAP-ARAP_25.05.2022_00h00	8.74061e-20	5.51983e-18	[3]	Group510	4.93569	[3]	3		PTK2	GO:0061041	telencephalon development	GO_BiologicalProcess-EBI-UniProt-GOA-ACAP-ARAP_25.05.2022_00h00	3.74893e-15	8.23471e-14	[3]	Group465	5.62303	[3]	3
DTD1	GO:1901698	negative regulation of cellular metabolic process	GO_BiologicalProcess-EBI-UniProt-GOA-ACAP-ARAP_25.05.2022_00h00	1.01022e-19	6.19207e-18	[3]	Group587	8.6661	[3]	3		PGRMC2	GO:0010604	epigenetic maintenance of chromatin in transcription-competent conformation	GO_BiologicalProcess-EBI-UniProt-GOA-ACAP-ARAP_25.05.2022_00h00	6.38639e-15	1.35604e-13	[3]	Group423	6.49895	[3]	3
ZEB1	GO:1901698	response to oxygen-containing compound	GO_BiologicalProcess-EBI-UniProt-GOA-ACAP-ARAP_25.05.2022_00h00	1.01022e-19	6.19207e-18	[3]	Group578	8.6661	[3]	3		RSRC2	GO:0002753	response to acid chemical	GO_BiologicalProcess-EBI-UniProt-GOA-ACAP-ARAP_25.05.2022_00h00	6.38639e-15	1.35604e-13	[3]	Group523	6.49895	[3]	3
GNA13	GO:0071495	actin cytoskeleton organization	GO_BiologicalProcess-EBI-UniProt-GOA-ACAP-ARAP_25.05.2022_00h00	3.34532e-18	1.7004e-16	[3]	Group578	7.82669	[3]	3		NOC2L	GO:0009725	toll-like receptor signaling pathway	GO_BiologicalProcess-EBI-UniProt-GOA-ACAP-ARAP_25.05.2022_00h00	1.67768e-14	3.33963e-13	[3]	Group523	5.32544	[3]	3
RARS	GO:0071495	cellular macromolecule metabolic process	GO_BiologicalProcess-EBI-UniProt-GOA-ACAP-ARAP_25.05.2022_00h00	3.34532e-18	1.7004e-16	[3]	Group574	7.82669	[3]	3		BTRC	GO:0048639	negative regulation of protein binding	GO_BiologicalProcess-EBI-UniProt-GOA-ACAP-ARAP_25.05.2022_00h00	7.44484e-13	1.02353e-11	[3]	Group407	10.3359	[3]	3
TRAK1	GO:0071495	neuron apoptotic process	GO_BiologicalProcess-EBI-UniProt-GOA-ACAP-ARAP_25.05.2022_00h00	3.34532e-18	1.7004e-16	[3]	Group587	7.82669	[3]	3		RCC2	GO:0046324	positive regulation of cell migration	GO_BiologicalProcess-EBI-UniProt-GOA-ACAP-ARAP_25.05.2022_00h00	7.44484e-13	1.02353e-11	[3]	Group526	10.3359	[3]	3
NAA50	GO:0044248	animal organ development	GO_BiologicalProcess-EBI-UniProt-GOA-ACAP-ARAP_25.05.2022_00h00	4.1197e-18	1.99662e-16	[3]	Group503	6.70515	[3]	3		MYO6	GO:0001649	positive regulation of response to external stimulus	GO_BiologicalProcess-EBI-UniProt-GOA-ACAP-ARAP_25.05.2022_00h00	7.44484e-13	1.02353e-11	[3]	Group527	10.3359	[3]	3
DCUN1D2	GO:0044248	nervous system development	GO_BiologicalProcess-EBI-UniProt-GOA-ACAP-ARAP_25.05.2022_00h00	4.1197e-18	1.99662e-16	[3]	Group581	6.70515	[3]	3		UGT8	GO:0071345	regulation of pattern recognition receptor signaling pathway	GO_BiologicalProcess-EBI-UniProt-GOA-ACAP-ARAP_25.05.2022_00h00	7.44484e-13	1.02353e-11	[3]	Group271	10.3359	[3]	3
ARF6	GO:0051649	regulation of macromolecule biosynthetic process	GO_BiologicalProcess-EBI-UniProt-GOA-ACAP-ARAP_25.05.2022_00h00	1.52731e-17	6.241e-16	[3]	Group577	6.65767	[3]	3		CAPN1	GO:0034250	regulation of vasculature development	GO_BiologicalProcess-EBI-UniProt-GOA-ACAP-ARAP_25.05.2022_00h00	7.44484e-13	1.02353e-11	[3]	Group515	10.3359	[3]	3
LPIN1	GO:0050790	organic substance biosynthetic process	GO_BiologicalProcess-EBI-UniProt-GOA-ACAP-ARAP_25.05.2022_00h00	2.84327e-17	1.1395e-15	[3]	Group587	6.35108	[3]	3		DDX6	GO:0002521	ubiquitin-dependent protein catabolic process	GO_BiologicalProcess-EBI-UniProt-GOA-ACAP-ARAP_25.05.2022_00h00	7.44484e-13	1.02353e-11	[3]	Group524	10.3359	[3]	3
ARFIP2	GO:0050790	organic substance transport	GO_BiologicalProcess-EBI-UniProt-GOA-ACAP-ARAP_25.05.2022_00h00	2.84327e-17	1.1395e-15	[3]	Group279	6.35108	[3]	3		ARHGAP5	GO:0019725	inorganic cation transmembrane transporter activity	GO_BiologicalProcess-EBI-UniProt-GOA-ACAP-ARAP_25.05.2022_00h00	1.97128e-12	2.51141e-11	[3]	Group488	7.93651	[3]	3
ACTN1	GO:0050790	positive regulation of cell communication	GO_BiologicalProcess-EBI-UniProt-GOA-ACAP-ARAP_25.05.2022_00h00	2.84327e-17	1.1395e-15	[3]	Group548	6.35108	[3]	3		FBXW7	GO:0051049	integrated stress response signaling	GO_BiologicalProcess-EBI-UniProt-GOA-ACAP-ARAP_25.05.2022_00h00	1.97128e-12	2.51141e-11	[3]	Group274	7.93651	[3]	3
KPNA2	GO:1901700	cytoskeleton organization	GO_BiologicalProcess-EBI-UniProt-GOA-ACAP-ARAP_25.05.2022_00h00	3.0471e-16	1.00796e-14	[3]	Group587	7.00565	[3]	3		NOVA1	GO:0007264	amide biosynthetic process	GO_BiologicalProcess-EBI-UniProt-GOA-ACAP-ARAP_25.05.2022_00h00	7.27589e-12	8.37604e-11	[3]	Group525	4.00133	[3]	3
LPGAT1	GO:1901700	regulation of response to stimulus	GO_BiologicalProcess-EBI-UniProt-GOA-ACAP-ARAP_25.05.2022_00h00	3.0471e-16	1.00796e-14	[3]	Group578	7.00565	[3]	3		PSME3	GO:2000177	cell-cell junction assembly	GO_BiologicalProcess-EBI-UniProt-GOA-ACAP-ARAP_25.05.2022_00h00	2.24728e-08	1.1996e-07	[3]	Group508	5.61432	[3]	3
RBPJ	GO:0043170	mitotic cell cycle	GO_BiologicalProcess-EBI-UniProt-GOA-ACAP-ARAP_25.05.2022_00h00	5.93511e-16	1.79258e-14	[3]	Group587	4.33778	[3]	3		SRF	GO:0007267	positive regulation of double-strand break repair	GO_BiologicalProcess-EBI-UniProt-GOA-ACAP-ARAP_25.05.2022_00h00	5.20429e-08	2.62412e-07	[3]	Group512	4.66252	[3]	3
PFDN4	GO:0043170	regulation of cellular process	GO_BiologicalProcess-EBI-UniProt-GOA-ACAP-ARAP_25.05.2022_00h00	5.93511e-16	1.79258e-14	[3]	Group510	4.33778	[3]	3		CORO1C	GO:0001666	establishment of protein localization	GO_BiologicalProcess-EBI-UniProt-GOA-ACAP-ARAP_25.05.2022_00h00	6.39041e-08	3.18853e-07	[3]	Group526	5.88235	[3]	3
LRRC59	GO:0044085	cell development	GO_BiologicalProcess-EBI-UniProt-GOA-ACAP-ARAP_25.05.2022_00h00	2.91155e-15	8.19955e-14	[3]	Group227	5.5952	[3]	3		SRSF9	GO:0051276	mitotic cell cycle	GO_BiologicalProcess-EBI-UniProt-GOA-ACAP-ARAP_25.05.2022_00h00	8.53215e-08	4.11741e-07	[3]	Group364	10.5263	[3]	3
HLTF	GO:0044085	cell differentiation	GO_BiologicalProcess-EBI-UniProt-GOA-ACAP-ARAP_25.05.2022_00h00	2.91155e-15	8.19955e-14	[3]	Group584	5.5952	[3]	3		XPOT	GO:0000904	mammary gland epithelium development	GO_BiologicalProcess-EBI-UniProt-GOA-ACAP-ARAP_25.05.2022_00h00	4.45284e-07	1.81437e-06	[3]	Group452	7.04225	[3]	3
USP4	GO:0044085	positive regulation of nucleobase-containing compound metabolic process	GO_BiologicalProcess-EBI-UniProt-GOA-ACAP-ARAP_25.05.2022_00h00	2.91155e-15	8.19955e-14	[3]	Group365	5.5952	[3]	3		ADAM15	GO:0048729	negative regulation of reactive oxygen species metabolic process	GO_BiologicalProcess-EBI-UniProt-GOA-ACAP-ARAP_25.05.2022_00h00	4.57236e-07	1.85123e-06	[3]	Group469	6.55738	[3]	3
MECP2	GO:0070997	response to hormone	GO_BiologicalProcess-EBI-UniProt-GOA-ACAP-ARAP_25.05.2022_00h00	2.90637e-15	8.29708e-14	[3]	Group587	12.3077	[3]	3		SND1	GO:0044539	import into cell	GO_BiologicalProcess-EBI-UniProt-GOA-ACAP-ARAP_25.05.2022_00h00	2.80262e-06	9.46255e-06	[3]	Group319	6.93512	[3]	3
BIRC2	GO:0048513	regulation of multicellular organismal development	GO_BiologicalProcess-EBI-UniProt-GOA-ACAP-ARAP_25.05.2022_00h00	5.2543e-15	1.35185e-13	[3]	Group582	5.46274	[3]	3		NELFCD	GO:0071396	regulation of anatomical structure size	GO_BiologicalProcess-EBI-UniProt-GOA-ACAP-ARAP_25.05.2022_00h00	2.80262e-06	9.46255e-06	[3]	Group479	6.93512	[3]	3
AIMP1	GO:0048513	regulation of multicellular organismal process	GO_BiologicalProcess-EBI-UniProt-GOA-ACAP-ARAP_25.05.2022_00h00	5.2543e-15	1.35185e-13	[3]	Group587	5.46274	[3]	3		RNF7	GO:0009888	regulation of intracellular transport	GO_BiologicalProcess-EBI-UniProt-GOA-ACAP-ARAP_25.05.2022_00h00	2.80262e-06	9.46255e-06	[3]	Group518	6.93512	[3]	3
RTKN	GO:0048513	regulation of protein catabolic process	GO_BiologicalProcess-EBI-UniProt-GOA-ACAP-ARAP_25.05.2022_00h00	5.2543e-15	1.35185e-13	[3]	Group464	5.46274	[3]	3		MAFG	GO:0006281	regulation of oxidative stress-induced cell death	GO_BiologicalProcess-EBI-UniProt-GOA-ACAP-ARAP_25.05.2022_00h00	2.80262e-06	9.46255e-06	[3]	Group527	6.93512	[3]	3
HMGCR	GO:0044093	generation of neurons	GO_BiologicalProcess-EBI-UniProt-GOA-ACAP-ARAP_25.05.2022_00h00	1.31597e-14	2.8273e-13	[3]	Group587	6.85012	[3]	3		ARPC5	GO:0006325	cellular response to chemical stimulus	GO_BiologicalProcess-EBI-UniProt-GOA-ACAP-ARAP_25.05.2022_00h00	8.85291e-06	2.66424e-05	[3]	Group442	6.62393	[3]	3
CCND2	GO:0044093	negative regulation of biosynthetic process	GO_BiologicalProcess-EBI-UniProt-GOA-ACAP-ARAP_25.05.2022_00h00	1.31597e-14	2.8273e-13	[3]	Group548	6.85012	[3]	3		NFE2L2	GO:0006325	positive regulation of cyclin-dependent protein kinase activity	GO_BiologicalProcess-EBI-UniProt-GOA-ACAP-ARAP_25.05.2022_00h00	8.85291e-06	2.66424e-05	[3]	Group151	6.62393	[3]	3
TXNDC12	GO:1901576	response to growth factor	GO_BiologicalProcess-EBI-UniProt-GOA-ACAP-ARAP_25.05.2022_00h00	1.53392e-14	3.16505e-13	[3]	Group587	4.78532	[3]	3		WASF2	GO:0010035	regulation of transcription by RNA polymerase I	GO_BiologicalProcess-EBI-UniProt-GOA-ACAP-ARAP_25.05.2022_00h00	2.41134e-05	6.56419e-05	[3]	Group524	6.08856	[3]	3
IRS2	GO:0044249	negative regulation of cellular component organization	GO_BiologicalProcess-EBI-UniProt-GOA-ACAP-ARAP_25.05.2022_00h00	1.01753e-13	1.72401e-12	[3]	Group587	4.7461	[3]	3		CTNND1	GO:0002067	actin cytoskeleton organization	GO_BiologicalProcess-EBI-UniProt-GOA-ACAP-ARAP_25.05.2022_00h00	2.42369e-05	6.57907e-05	[3]	Group451	8.53081	[3]	3
COTL1	GO:0034641	brain development	GO_BiologicalProcess-EBI-UniProt-GOA-ACAP-ARAP_25.05.2022_00h00	4.59246e-13	6.9859e-12	[3]	Group477	4.59427	[3]	3		TNKS2	GO:0048025	positive regulation of lipid catabolic process	GO_BiologicalProcess-EBI-UniProt-GOA-ACAP-ARAP_25.05.2022_00h00	2.42369e-05	6.57907e-05	[3]	Group385	8.53081	[3]	3
MEF2A	GO:0034641	positive regulation of protein kinase activity	GO_BiologicalProcess-EBI-UniProt-GOA-ACAP-ARAP_25.05.2022_00h00	4.59246e-13	6.9859e-12	[3]	Group587	4.59427	[3]	3		COPB1	GO:0006325	regulation of MAP kinase activity	GO_BiologicalProcess-EBI-UniProt-GOA-ACAP-ARAP_25.05.2022_00h00	3.40582e-05	8.98968e-05	[3]	Group067	10	[3]	3
SPCS1	GO:0009888	amide biosynthetic process	GO_BiologicalProcess-EBI-UniProt-GOA-ACAP-ARAP_25.05.2022_00h00	6.13786e-13	9.13664e-12	[3]	Group415	6.20192	[3]	3		ZNF638	GO:0090162	positive regulation of amyloid-beta formation	GO_BiologicalProcess-EBI-UniProt-GOA-ACAP-ARAP_25.05.2022_00h00	0.000145743	0.000327665	[3]	Group421	8.75	[3]	3
POLE4	GO:0009888	regulation of transcription, DNA-templated	GO_BiologicalProcess-EBI-UniProt-GOA-ACAP-ARAP_25.05.2022_00h00	6.13786e-13	9.13664e-12	[3]	Group587	6.20192	[3]	3		HSF1	GO:0005068	nuclear receptor coactivator activity	GO_BiologicalProcess-EBI-UniProt-GOA-ACAP-ARAP_25.05.2022_00h00	0.00481584	0.00738016	[3]	Group526	5.625	[3]	3
LPL	GO:0000278	negative regulation of signaling	GO_BiologicalProcess-EBI-UniProt-GOA-ACAP-ARAP_25.05.2022_00h00	8.39709e-13	1.20686e-11	[3]	Group585	7.88934	[3]	3		IRAK1	GO:0000902	regulation of carbohydrate biosynthetic process	GO_BiologicalProcess-EBI-UniProt-GOA-ACAP-ARAP_25.05.2022_00h00	0.00723878	0.0105517	[3]	Group475	4.77941	[3]	3
FADS1	GO:0044092	enzyme regulator activity	GO_BiologicalProcess-EBI-UniProt-GOA-ACAP-ARAP_25.05.2022_00h00	1.90258e-08	1.10138e-07	[3]	Group587	6.34662	[3]	3		TSC1	GO:0044093	regulation of cardiac muscle tissue growth	GO_BiologicalProcess-EBI-UniProt-GOA-ACAP-ARAP_25.05.2022_00h00	0.00723878	0.0105517	[3]	Group527	4.77941	[3]	3
CUL4B	GO:0044092	negative regulation of intracellular signal transduction	GO_BiologicalProcess-EBI-UniProt-GOA-ACAP-ARAP_25.05.2022_00h00	1.90258e-08	1.10138e-07	[3]	Group423	6.34662	[3]	3		PPP2R5A	GO:0006898	attachment of GPI anchor to protein	GO_BiologicalProcess-EBI-UniProt-GOA-ACAP-ARAP_25.05.2022_00h00	0.016834	0.022418	[3]	Group025	11.1111	[3]	3
CALU	GO:0044092	positive regulation of cell cycle	GO_BiologicalProcess-EBI-UniProt-GOA-ACAP-ARAP_25.05.2022_00h00	1.90258e-08	1.10138e-07	[3]	Group548	6.34662	[3]	3		SYPL1	GO:0065003	regulation of mRNA metabolic process	GO_BiologicalProcess-EBI-UniProt-GOA-ACAP-ARAP_25.05.2022_00h00	0.0182521	0.0241549	[3]	Group205	6.66667	[3]	3
GSK3B	GO:0006979	cell-matrix adhesion	GO_BiologicalProcess-EBI-UniProt-GOA-ACAP-ARAP_25.05.2022_00h00	2.60164e-08	1.48543e-07	[3]	Group572	8.65801	[3]	3		CADM1	GO:0016538	response to estradiol	GO_BiologicalProcess-EBI-UniProt-GOA-ACAP-ARAP_25.05.2022_00h00	0.01843	0.0243735	[3]	Group479	4.3956	[3]	3
ERRFI1	GO:0006979	regulation of peptidyl-serine phosphorylation	GO_BiologicalProcess-EBI-UniProt-GOA-ACAP-ARAP_25.05.2022_00h00	2.60164e-08	1.48543e-07	[3]	Group560	8.65801	[3]	3		NCOR2	GO:0010165	response to food	GO_BiologicalProcess-EBI-UniProt-GOA-ACAP-ARAP_25.05.2022_00h00	0.01843	0.0243735	[3]	Group527	4.3956	[3]	3
MTDH	GO:0061061	negative regulation of cellular amide metabolic process	GO_BiologicalProcess-EBI-UniProt-GOA-ACAP-ARAP_25.05.2022_00h00	2.81413e-08	1.60237e-07	[3]	Group389	7.50361	[3]	3		TOB1	GO:0009653	response to metal ion	GO_BiologicalProcess-EBI-UniProt-GOA-ACAP-ARAP_25.05.2022_00h00	0.0191554	0.0251242	[3]	Group475	4.34783	[3]	3
PTEN	GO:0061061	positive regulation of cellular amide metabolic process	GO_BiologicalProcess-EBI-UniProt-GOA-ACAP-ARAP_25.05.2022_00h00	2.81413e-08	1.60237e-07	[3]	Group420	7.50361	[3]	3		TTC37	GO:1903201	response to nitrogen compound	GO_BiologicalProcess-EBI-UniProt-GOA-ACAP-ARAP_25.05.2022_00h00	0.0191554	0.0251242	[3]	Group527	4.34783	[3]	3
TFCP2	GO:0061061	regulation of ERK1 and ERK2 cascade	GO_BiologicalProcess-EBI-UniProt-GOA-ACAP-ARAP_25.05.2022_00h00	2.81413e-08	1.60237e-07	[3]	Group307	7.50361	[3]	3		PWP1	GO:0051302	regulation of hormone secretion	GO_BiologicalProcess-EBI-UniProt-GOA-ACAP-ARAP_25.05.2022_00h00	0.0298524	0.0373595	[3]	Group160	7.93651	[3]	3
CIAPIN1	GO:0033002	positive regulation of epithelial cell proliferation	GO_BiologicalProcess-EBI-UniProt-GOA-ACAP-ARAP_25.05.2022_00h00	3.09021e-08	1.74526e-07	[3]	Group486	11.8483	[3]	3		BMI1	GO:0051702	miRNA processing	GO_BiologicalProcess-EBI-UniProt-GOA-ACAP-ARAP_25.05.2022_00h00	0.029848	0.0373785	[3]	Group431	5.39216	[3]	3
GLG1	GO:0033002	positive regulation of gliogenesis	GO_BiologicalProcess-EBI-UniProt-GOA-ACAP-ARAP_25.05.2022_00h00	3.09021e-08	1.74526e-07	[3]	Group543	11.8483	[3]	3		ZNF622	GO:0019395	gene silencing by RNA	GO_BiologicalProcess-EBI-UniProt-GOA-ACAP-ARAP_25.05.2022_00h00	0.0360662	0.0441245	[3]	Group191	5.33333	[3]	3
HIVEP2	GO:0033002	secretion	GO_BiologicalProcess-EBI-UniProt-GOA-ACAP-ARAP_25.05.2022_00h00	3.09021e-08	1.74526e-07	[3]	Group408	11.8483	[3]	3		EPB41L2	GO:0062013	postsynaptic signal transduction	GO_BiologicalProcess-EBI-UniProt-GOA-ACAP-ARAP_25.05.2022_00h00	0.0396509	0.0478969	[3]	Group032	7.35294	[3]	3
KBTBD2	GO:0051098	erythrocyte homeostasis	GO_BiologicalProcess-EBI-UniProt-GOA-ACAP-ARAP_25.05.2022_00h00	3.83983e-08	2.13963e-07	[3]	Group459	9.09091	[3]	3		TWF1	GO:0120036	regulation of muscle system process	GO_BiologicalProcess-EBI-UniProt-GOA-ACAP-ARAP_25.05.2022_00h00	1.97437e-21	1.64045e-19	[4, 5]	Group417	5.90685	[4	4
AP1S2	GO:0051668	regulation of canonical Wnt signaling pathway	GO_BiologicalProcess-EBI-UniProt-GOA-ACAP-ARAP_25.05.2022_00h00	6.51264e-08	3.43603e-07	[3]	Group461	7.34463	[3]	3		PLS3	GO:0051247	amyloid precursor protein catabolic process	GO_BiologicalProcess-EBI-UniProt-GOA-ACAP-ARAP_25.05.2022_00h00	5.67507e-19	3.01251e-17	[4, 5, 6]	Group513	6.54997	[4	4
HACD2	GO:0070482	dephosphorylation	GO_BiologicalProcess-EBI-UniProt-GOA-ACAP-ARAP_25.05.2022_00h00	7.37611e-08	3.82383e-07	[3]	Group560	9.34844	[3]	3		SNX6	GO:0010975	organonitrogen compound catabolic process	GO_BiologicalProcess-EBI-UniProt-GOA-ACAP-ARAP_25.05.2022_00h00	5.67507e-19	3.01251e-17	[4, 5, 6]	Group521	6.54997	[4	4
KLHL5	GO:0070482	positive regulation of protein-containing complex assembly	GO_BiologicalProcess-EBI-UniProt-GOA-ACAP-ARAP_25.05.2022_00h00	7.37611e-08	3.82383e-07	[3]	Group229	9.34844	[3]	3		PIK3R1	GO:0051050	regulation of cellular response to heat	GO_BiologicalProcess-EBI-UniProt-GOA-ACAP-ARAP_25.05.2022_00h00	5.67507e-19	3.01251e-17	[4, 5, 6]	Group459	6.54997	[4	4
ALDH3A2	GO:0009991	negative regulation of histone methylation	GO_BiologicalProcess-EBI-UniProt-GOA-ACAP-ARAP_25.05.2022_00h00	1.38434e-05	4.37779e-05	[3]	Group412	6.95971	[3]	3		SMARCA1	GO:0007267	protein secretion	GO_BiologicalProcess-EBI-UniProt-GOA-ACAP-ARAP_25.05.2022_00h00	9.05495e-18	3.26491e-16	[4, 5]	Group525	5.51124	[4	4
SEMA7A	GO:0072593	limbic system development	GO_BiologicalProcess-EBI-UniProt-GOA-ACAP-ARAP_25.05.2022_00h00	1.71907e-05	5.33115e-05	[3]	Group560	8.84615	[3]	3		VAMP7	GO:0018205	developmental growth involved in morphogenesis	GO_BiologicalProcess-EBI-UniProt-GOA-ACAP-ARAP_25.05.2022_00h00	1.52479e-16	4.10406e-15	[4, 5]	Group386	6.49433	[4	4
ESRRA	GO:0072593	vesicle budding from membrane	GO_BiologicalProcess-EBI-UniProt-GOA-ACAP-ARAP_25.05.2022_00h00	1.71907e-05	5.33115e-05	[3]	Group229	8.84615	[3]	3		TARBP1	GO:0048872	membrane assembly	GO_BiologicalProcess-EBI-UniProt-GOA-ACAP-ARAP_25.05.2022_00h00	3.65161e-16	9.18187e-15	[4, 5]	Group397	8.99705	[4	4
UBTD2	GO:0042592	B cell proliferation	GO_BiologicalProcess-EBI-UniProt-GOA-ACAP-ARAP_25.05.2022_00h00	2.11949e-05	6.40149e-05	[3]	Group142	5.09131	[3]	3		AKT3	GO:0033674	autophagy	GO_BiologicalProcess-EBI-UniProt-GOA-ACAP-ARAP_25.05.2022_00h00	4.348e-16	1.0791e-14	[4, 5, 6]	Group525	6.40946	[4	4
INTS10	GO:0042592	mitotic nuclear division	GO_BiologicalProcess-EBI-UniProt-GOA-ACAP-ARAP_25.05.2022_00h00	2.11949e-05	6.40149e-05	[3]	Group419	5.09131	[3]	3		SLC27A4	GO:0010799	negative regulation of cell death	GO_BiologicalProcess-EBI-UniProt-GOA-ACAP-ARAP_25.05.2022_00h00	5.94297e-16	1.45603e-14	[4, 5, 6]	Group386	6.11688	[4	4
CCDC6	GO:0006629	DNA repair	GO_BiologicalProcess-EBI-UniProt-GOA-ACAP-ARAP_25.05.2022_00h00	2.21177e-05	6.63212e-05	[3]	Group276	5.29801	[3]	3		SEC11C	GO:0031400	negative regulation of programmed cell death	GO_BiologicalProcess-EBI-UniProt-GOA-ACAP-ARAP_25.05.2022_00h00	5.94297e-16	1.45603e-14	[4, 5, 6]	Group523	6.11688	[4	4
COLGALT1	GO:0006629	regulation of chromosome organization	GO_BiologicalProcess-EBI-UniProt-GOA-ACAP-ARAP_25.05.2022_00h00	2.21177e-05	6.63212e-05	[3]	Group580	5.29801	[3]	3		ANP32A	GO:0040012	positive regulation of glucose transmembrane transport	GO_BiologicalProcess-EBI-UniProt-GOA-ACAP-ARAP_25.05.2022_00h00	5.94297e-16	1.45603e-14	[4, 5, 6]	Group373	6.11688	[4	4
EIF3F	GO:0009314	negative regulation of cell growth	GO_BiologicalProcess-EBI-UniProt-GOA-ACAP-ARAP_25.05.2022_00h00	5.67742e-05	0.000154059	[3]	Group526	6.84105	[3]	3		TKT	GO:0022607	positive regulation of small molecule metabolic process	GO_BiologicalProcess-EBI-UniProt-GOA-ACAP-ARAP_25.05.2022_00h00	7.43124e-16	1.77514e-14	[4, 5, 6]	Group386	7.66871	[4	4
RPA1	GO:0044283	exocytosis	GO_BiologicalProcess-EBI-UniProt-GOA-ACAP-ARAP_25.05.2022_00h00	9.25545e-05	0.000236958	[3]	Group580	6.29921	[3]	3		PER1	GO:0044085	regulation of biosynthetic process	GO_BiologicalProcess-EBI-UniProt-GOA-ACAP-ARAP_25.05.2022_00h00	1.30184e-14	2.67507e-13	[4, 5, 7]	Group450	9.97921	[4	4
PHB	GO:0044283	T cell proliferation	GO_BiologicalProcess-EBI-UniProt-GOA-ACAP-ARAP_25.05.2022_00h00	9.25545e-05	0.000236958	[3]	Group523	6.29921	[3]	3		SLC44A1	GO:0060341	negative regulation of signaling	GO_BiologicalProcess-EBI-UniProt-GOA-ACAP-ARAP_25.05.2022_00h00	1.58465e-13	2.67989e-12	[4, 5]	Group496	7.87097	[4	4
STAT3	GO:0010035	olfactory lobe development	GO_BiologicalProcess-EBI-UniProt-GOA-ACAP-ARAP_25.05.2022_00h00	0.000177107	0.000422785	[3]	Group560	6.22951	[3]	3		SIGMAR1	GO:0060548	regulation of lamellipodium organization	GO_BiologicalProcess-EBI-UniProt-GOA-ACAP-ARAP_25.05.2022_00h00	1.58465e-13	2.67989e-12	[4, 5]	Group521	7.87097	[4	4
HECTD1	GO:0009612	glycerolipid biosynthetic process	GO_BiologicalProcess-EBI-UniProt-GOA-ACAP-ARAP_25.05.2022_00h00	0.000187934	0.000444558	[3]	Group363	8.37004	[3]	3		TBC1D9	GO:0009892	axonogenesis	GO_BiologicalProcess-EBI-UniProt-GOA-ACAP-ARAP_25.05.2022_00h00	3.0411e-13	4.72483e-12	[4, 5]	Group523	9.17782	[4	4
CDH2	GO:0051246	positive regulation of biological process	GO_BiologicalProcess-EBI-UniProt-GOA-ACAP-ARAP_25.05.2022_00h00	1.83969e-28	1.91695e-25	[4, 5]	Group587	7.17912	[4	4		VOPP1	GO:0032879	cellular response to acetylcholine	GO_BiologicalProcess-EBI-UniProt-GOA-ACAP-ARAP_25.05.2022_00h00	1.31349e-12	1.76766e-11	[4, 5, 6]	Group342	8.68794	[4	4
MUT	GO:0051246	regulation of protein metabolic process	GO_BiologicalProcess-EBI-UniProt-GOA-ACAP-ARAP_25.05.2022_00h00	1.83969e-28	1.91695e-25	[4, 5]	Group510	7.17912	[4	4		GAB2	GO:0034329	cytoplasmic sequestering of protein	GO_BiologicalProcess-EBI-UniProt-GOA-ACAP-ARAP_25.05.2022_00h00	1.31349e-12	1.76766e-11	[4, 5, 6]	Group521	8.68794	[4	4
NCKAP1	GO:0043067	regulation of apoptotic process	GO_BiologicalProcess-EBI-UniProt-GOA-ACAP-ARAP_25.05.2022_00h00	1.62939e-23	3.77295e-21	[4, 5]	Group316	8.25977	[4	4		KEAP1	GO:0080090	B cell differentiation	GO_BiologicalProcess-EBI-UniProt-GOA-ACAP-ARAP_25.05.2022_00h00	1.41393e-12	1.88953e-11	[4, 5, 6]	Group465	5.84653	[4	4
MRPL16	GO:0043067	regulation of cell death	GO_BiologicalProcess-EBI-UniProt-GOA-ACAP-ARAP_25.05.2022_00h00	1.62939e-23	3.77295e-21	[4, 5]	Group587	8.25977	[4	4		WLS	GO:0048713	peripheral nervous system development	GO_BiologicalProcess-EBI-UniProt-GOA-ACAP-ARAP_25.05.2022_00h00	1.41393e-12	1.88953e-11	[4, 5, 6]	Group520	5.84653	[4	4
ZEB2	GO:0043069	cellular response to stress	GO_BiologicalProcess-EBI-UniProt-GOA-ACAP-ARAP_25.05.2022_00h00	8.48075e-22	8.83694e-20	[4, 5, 6]	Group587	9.7137	[4	4		NASP	GO:0048518	negative regulation of focal adhesion assembly	GO_BiologicalProcess-EBI-UniProt-GOA-ACAP-ARAP_25.05.2022_00h00	1.44925e-12	1.92328e-11	[4, 6, 7, 8]	Group417	12.7049	[4	4
STAT1	GO:0051247	cellular response to oxygen-containing compound	GO_BiologicalProcess-EBI-UniProt-GOA-ACAP-ARAP_25.05.2022_00h00	2.91076e-19	1.59632e-17	[4, 5, 6]	Group587	7.65401	[4	4		BACE1	GO:0035556	regulation of lipid catabolic process	GO_BiologicalProcess-EBI-UniProt-GOA-ACAP-ARAP_25.05.2022_00h00	1.44925e-12	1.92328e-11	[4, 6, 7, 8]	Group513	12.7049	[4	4
STIM1	GO:0051247	macromolecule metabolic process	GO_BiologicalProcess-EBI-UniProt-GOA-ACAP-ARAP_25.05.2022_00h00	2.91076e-19	1.59632e-17	[4, 5, 6]	Group510	7.65401	[4	4		YTHDC1	GO:0072359	negative regulation of transmembrane transport	GO_BiologicalProcess-EBI-UniProt-GOA-ACAP-ARAP_25.05.2022_00h00	8.88902e-12	1.00514e-10	[4, 5, 6]	Group417	6.47986	[4	4
SMARCA4	GO:0051247	regulation of signaling	GO_BiologicalProcess-EBI-UniProt-GOA-ACAP-ARAP_25.05.2022_00h00	2.91076e-19	1.59632e-17	[4, 5, 6]	Group581	7.65401	[4	4		YY1	GO:0033674	regulation of purine nucleotide biosynthetic process	GO_BiologicalProcess-EBI-UniProt-GOA-ACAP-ARAP_25.05.2022_00h00	8.88902e-12	1.00514e-10	[4, 5, 6]	Group524	6.47986	[4	4
PLK2	GO:0015031	regulation of biosynthetic process	GO_BiologicalProcess-EBI-UniProt-GOA-ACAP-ARAP_25.05.2022_00h00	5.24195e-18	2.4276e-16	[4, 5, 6]	Group577	7.42996	[4	4		SH3GL1	GO:0048813	cell activation involved in immune response	GO_BiologicalProcess-EBI-UniProt-GOA-ACAP-ARAP_25.05.2022_00h00	1.44622e-11	1.52692e-10	[4, 5, 6]	Group387	7.15137	[4	4
HSDL1	GO:1902531	cellular nitrogen compound biosynthetic process	GO_BiologicalProcess-EBI-UniProt-GOA-ACAP-ARAP_25.05.2022_00h00	2.76161e-16	9.43475e-15	[4, 5, 6]	Group587	6.9361	[4	4		YY1AP1	GO:0001837	regulation of DNA replication	GO_BiologicalProcess-EBI-UniProt-GOA-ACAP-ARAP_25.05.2022_00h00	1.44622e-11	1.52692e-10	[4, 5, 6]	Group292	7.15137	[4	4
MRPS9	GO:1902531	regulation of cellular biosynthetic process	GO_BiologicalProcess-EBI-UniProt-GOA-ACAP-ARAP_25.05.2022_00h00	2.76161e-16	9.43475e-15	[4, 5, 6]	Group369	6.9361	[4	4		SOX2-OT	GO:0010676	positive regulation of cyclic-nucleotide phosphodiesterase activity	GO_BiologicalProcess-EBI-UniProt-GOA-ACAP-ARAP_25.05.2022_00h00	2.86075e-08	1.49778e-07	[4, 5]	Group525	4.03691	[4	4
PCYOX1	GO:1902531	regulation of gene expression	GO_BiologicalProcess-EBI-UniProt-GOA-ACAP-ARAP_25.05.2022_00h00	2.76161e-16	9.43475e-15	[4, 5, 6]	Group551	6.9361	[4	4		CERS2	GO:0050890	nuclear division	GO_BiologicalProcess-EBI-UniProt-GOA-ACAP-ARAP_25.05.2022_00h00	2.96072e-08	1.54588e-07	[4, 5, 6]	Group527	14.2857	[4	4
CAB39L	GO:0006886	autophagy	GO_BiologicalProcess-EBI-UniProt-GOA-ACAP-ARAP_25.05.2022_00h00	2.9146e-16	9.79683e-15	[4, 5, 6, 7]	Group577	8.85246	[4	4		FLNA	GO:0009892	regulation of gliogenesis	GO_BiologicalProcess-EBI-UniProt-GOA-ACAP-ARAP_25.05.2022_00h00	3.12683e-08	1.62817e-07	[4, 5]	Group525	4.07622	[4	4
PGRMC2	GO:0006886	central nervous system development	GO_BiologicalProcess-EBI-UniProt-GOA-ACAP-ARAP_25.05.2022_00h00	2.9146e-16	9.79683e-15	[4, 5, 6, 7]	Group518	8.85246	[4	4		PBX2	GO:0042060	positive regulation of transmembrane transport	GO_BiologicalProcess-EBI-UniProt-GOA-ACAP-ARAP_25.05.2022_00h00	4.06672e-08	2.08351e-07	[4, 5, 6]	Group512	8.42391	[4	4
PAK2	GO:0031329	macromolecule catabolic process	GO_BiologicalProcess-EBI-UniProt-GOA-ACAP-ARAP_25.05.2022_00h00	5.21996e-16	1.59977e-14	[4, 5]	Group503	9.12365	[4	4		SNAPIN	GO:0031098	positive regulation of protein modification process	GO_BiologicalProcess-EBI-UniProt-GOA-ACAP-ARAP_25.05.2022_00h00	7.82515e-08	3.81476e-07	[4, 5, 6]	Group516	7.70975	[4	4
MYO6	GO:0031329	regulation of localization	GO_BiologicalProcess-EBI-UniProt-GOA-ACAP-ARAP_25.05.2022_00h00	5.21996e-16	1.59977e-14	[4, 5]	Group581	9.12365	[4	4		MMP24	GO:0097581	negative regulation of cell-substrate adhesion	GO_BiologicalProcess-EBI-UniProt-GOA-ACAP-ARAP_25.05.2022_00h00	8.64219e-08	4.16001e-07	[4, 5]	Group483	6.03352	[4	4
VPS36	GO:0031329	tissue development	GO_BiologicalProcess-EBI-UniProt-GOA-ACAP-ARAP_25.05.2022_00h00	5.21996e-16	1.59977e-14	[4, 5]	Group264	9.12365	[4	4		GNAI1	GO:0023051	positive regulation of cellular component organization	GO_BiologicalProcess-EBI-UniProt-GOA-ACAP-ARAP_25.05.2022_00h00	8.64219e-08	4.16001e-07	[4, 5]	Group520	6.03352	[4	4
ERBIN	GO:0051402	negative regulation of gene expression	GO_BiologicalProcess-EBI-UniProt-GOA-ACAP-ARAP_25.05.2022_00h00	4.5312e-15	1.18038e-13	[4, 5]	Group587	14.6067	[4	4		RHOC	GO:0010959	nucleic acid metabolic process	GO_BiologicalProcess-EBI-UniProt-GOA-ACAP-ARAP_25.05.2022_00h00	9.06626e-08	4.3206e-07	[4, 5, 6]	Group525	4.76424	[4	4
BTRC	GO:0007399	cell migration	GO_BiologicalProcess-EBI-UniProt-GOA-ACAP-ARAP_25.05.2022_00h00	6.24605e-15	1.56829e-13	[4, 5]	Group529	6.02045	[4	4		ID1	GO:0010769	protein phosphorylation	GO_BiologicalProcess-EBI-UniProt-GOA-ACAP-ARAP_25.05.2022_00h00	1.10052e-07	5.10461e-07	[4, 5]	Group320	8.43023	[4	4
HEY1	GO:0007399	positive regulation of cell population proliferation	GO_BiologicalProcess-EBI-UniProt-GOA-ACAP-ARAP_25.05.2022_00h00	6.24605e-15	1.56829e-13	[4, 5]	Group587	6.02045	[4	4		LASP1	GO:0061061	cellular response to amino acid starvation	GO_BiologicalProcess-EBI-UniProt-GOA-ACAP-ARAP_25.05.2022_00h00	1.96976e-07	8.55502e-07	[4, 5, 6]	Group460	4.63177	[4	4
UBE2J1	GO:0001944	positive regulation of cell death	GO_BiologicalProcess-EBI-UniProt-GOA-ACAP-ARAP_25.05.2022_00h00	7.18007e-15	1.76038e-13	[4, 5, 6]	Group587	9.06769	[4	4		PAFAH1B3	GO:0009653	embryonic brain development	GO_BiologicalProcess-EBI-UniProt-GOA-ACAP-ARAP_25.05.2022_00h00	4.03137e-07	1.65676e-06	[4, 5, 6, 7]	Group465	5.79235	[4	4
UGT8	GO:0001944	positive regulation of supramolecular fiber organization	GO_BiologicalProcess-EBI-UniProt-GOA-ACAP-ARAP_25.05.2022_00h00	7.18007e-15	1.76038e-13	[4, 5, 6]	Group476	9.06769	[4	4		MCM7	GO:1900025	pallium development	GO_BiologicalProcess-EBI-UniProt-GOA-ACAP-ARAP_25.05.2022_00h00	4.03137e-07	1.65676e-06	[4, 5, 6, 7]	Group441	5.79235	[4	4
MPP2	GO:0022008	cellular component disassembly	GO_BiologicalProcess-EBI-UniProt-GOA-ACAP-ARAP_25.05.2022_00h00	1.19662e-14	2.7404e-13	[4, 5, 6]	Group529	6.77583	[4	4		AMFR	GO:0009892	glial cell differentiation	GO_BiologicalProcess-EBI-UniProt-GOA-ACAP-ARAP_25.05.2022_00h00	4.48831e-07	1.82493e-06	[4, 5, 6]	Group348	7.15789	[4	4
IMPAD1	GO:0022008	positive regulation of organelle organization	GO_BiologicalProcess-EBI-UniProt-GOA-ACAP-ARAP_25.05.2022_00h00	1.19662e-14	2.7404e-13	[4, 5, 6]	Group487	6.77583	[4	4		DOCK3	GO:0010811	negative regulation of transport	GO_BiologicalProcess-EBI-UniProt-GOA-ACAP-ARAP_25.05.2022_00h00	4.8831e-07	1.96869e-06	[4, 5, 6]	Group512	7.3903	[4	4
DOCK1	GO:0022008	protein localization to organelle	GO_BiologicalProcess-EBI-UniProt-GOA-ACAP-ARAP_25.05.2022_00h00	1.19662e-14	2.7404e-13	[4, 5, 6]	Group587	6.77583	[4	4		UBE2A	GO:0031589	mononuclear cell proliferation	GO_BiologicalProcess-EBI-UniProt-GOA-ACAP-ARAP_25.05.2022_00h00	5.22855e-07	2.09033e-06	[4, 6, 7]	Group520	11.1801	[4	4
ITPR1	GO:1902903	positive regulation of biosynthetic process	GO_BiologicalProcess-EBI-UniProt-GOA-ACAP-ARAP_25.05.2022_00h00	1.26197e-14	2.79782e-13	[4, 5]	Group396	11.8519	[4	4		XPO6	GO:0016043	animal organ development	GO_BiologicalProcess-EBI-UniProt-GOA-ACAP-ARAP_25.05.2022_00h00	5.69283e-07	2.25705e-06	[4, 5, 6]	Group384	10.6145	[4	4
FBXW7	GO:1902903	regulation of locomotion	GO_BiologicalProcess-EBI-UniProt-GOA-ACAP-ARAP_25.05.2022_00h00	1.26197e-14	2.79782e-13	[4, 5]	Group344	11.8519	[4	4		RAF1	GO:0048522	ERBB signaling pathway	GO_BiologicalProcess-EBI-UniProt-GOA-ACAP-ARAP_25.05.2022_00h00	5.69283e-07	2.25705e-06	[4, 5, 6]	Group259	10.6145	[4	4
FAM199X	GO:1902903	reproductive structure development	GO_BiologicalProcess-EBI-UniProt-GOA-ACAP-ARAP_25.05.2022_00h00	1.26197e-14	2.79782e-13	[4, 5]	Group584	11.8519	[4	4		UBTF	GO:0010800	mRNA polyadenylation	GO_BiologicalProcess-EBI-UniProt-GOA-ACAP-ARAP_25.05.2022_00h00	6.10456e-07	2.41029e-06	[4, 5, 6, 7]	Group371	6.69014	[4	4
NOVA1	GO:0010556	positive regulation of cell migration	GO_BiologicalProcess-EBI-UniProt-GOA-ACAP-ARAP_25.05.2022_00h00	1.50238e-14	3.13095e-13	[4, 5]	Group587	5.2822	[4	4		DCAKD	GO:0048518	muscle tissue development	GO_BiologicalProcess-EBI-UniProt-GOA-ACAP-ARAP_25.05.2022_00h00	6.10456e-07	2.41029e-06	[4, 5, 6, 7]	Group449	6.69014	[4	4
FOXJ3	GO:0036211	positive regulation of response to stimulus	GO_BiologicalProcess-EBI-UniProt-GOA-ACAP-ARAP_25.05.2022_00h00	1.63329e-14	3.30464e-13	[4, 5]	Group510	5.39691	[4	4		MCAM	GO:0060425	positive regulation of smooth muscle cell proliferation	GO_BiologicalProcess-EBI-UniProt-GOA-ACAP-ARAP_25.05.2022_00h00	6.10456e-07	2.41029e-06	[4, 5, 6, 7]	Group433	6.69014	[4	4
DDX6	GO:0036211	response to organic cyclic compound	GO_BiologicalProcess-EBI-UniProt-GOA-ACAP-ARAP_25.05.2022_00h00	1.63329e-14	3.30464e-13	[4, 5]	Group587	5.39691	[4	4		GNG5	GO:0021762	positive regulation of viral process	GO_BiologicalProcess-EBI-UniProt-GOA-ACAP-ARAP_25.05.2022_00h00	6.10456e-07	2.41029e-06	[4, 5, 6, 7]	Group526	6.69014	[4	4
KIF21A	GO:0072359	peptidyl-amino acid modification	GO_BiologicalProcess-EBI-UniProt-GOA-ACAP-ARAP_25.05.2022_00h00	2.50174e-14	4.78314e-13	[4, 5]	Group587	7.67285	[4	4		USP33	GO:0006259	positive regulation of leukocyte proliferation	GO_BiologicalProcess-EBI-UniProt-GOA-ACAP-ARAP_25.05.2022_00h00	6.529e-07	2.54631e-06	[4, 5]	Group521	8.10811	[4	4
CCND3	GO:0072359	positive regulation of transferase activity	GO_BiologicalProcess-EBI-UniProt-GOA-ACAP-ARAP_25.05.2022_00h00	2.50174e-14	4.78314e-13	[4, 5]	Group464	7.67285	[4	4		C12orf10	GO:0009893	regulation of dendritic spine morphogenesis	GO_BiologicalProcess-EBI-UniProt-GOA-ACAP-ARAP_25.05.2022_00h00	6.529e-07	2.54631e-06	[4, 5]	Group515	8.10811	[4	4
QRICH1	GO:0071417	organic cyclic compound biosynthetic process	GO_BiologicalProcess-EBI-UniProt-GOA-ACAP-ARAP_25.05.2022_00h00	2.68757e-14	5.09173e-13	[4, 5]	Group587	9.43953	[4	4		NACC1	GO:0009968	intrinsic apoptotic signaling pathway in response to DNA damage	GO_BiologicalProcess-EBI-UniProt-GOA-ACAP-ARAP_25.05.2022_00h00	7.99995e-07	3.07604e-06	[4, 5, 6]	Group516	10.3825	[4	4
TJP1	GO:0071417	regulation of RNA metabolic process	GO_BiologicalProcess-EBI-UniProt-GOA-ACAP-ARAP_25.05.2022_00h00	2.68757e-14	5.09173e-13	[4, 5]	Group578	9.43953	[4	4		DDX42	GO:0010506	peptide biosynthetic process	GO_BiologicalProcess-EBI-UniProt-GOA-ACAP-ARAP_25.05.2022_00h00	8.64537e-07	3.2911e-06	[4, 5, 6, 7]	Group398	7.4813	[4	4
PNPLA8	GO:0033043	cell cycle process	GO_BiologicalProcess-EBI-UniProt-GOA-ACAP-ARAP_25.05.2022_00h00	3.17001e-14	5.84628e-13	[4, 5]	Group584	7.47664	[4	4		LGALS3BP	GO:0003012	male sex differentiation	GO_BiologicalProcess-EBI-UniProt-GOA-ACAP-ARAP_25.05.2022_00h00	9.31314e-07	3.51727e-06	[4, 5, 6, 7, 8]	Group398	8.88031	[4	4
GOLT1B	GO:0033043	heterocycle metabolic process	GO_BiologicalProcess-EBI-UniProt-GOA-ACAP-ARAP_25.05.2022_00h00	3.17001e-14	5.84628e-13	[4, 5]	Group396	7.47664	[4	4		COPS8	GO:0005219	regulation of protein kinase B signaling	GO_BiologicalProcess-EBI-UniProt-GOA-ACAP-ARAP_25.05.2022_00h00	9.31314e-07	3.51727e-06	[4, 5, 6, 7, 8]	Group490	8.88031	[4	4
PSME3	GO:0031326	cellular aromatic compound metabolic process	GO_BiologicalProcess-EBI-UniProt-GOA-ACAP-ARAP_25.05.2022_00h00	3.9985e-14	7.18352e-13	[4, 5]	Group587	5.19031	[4	4		TWF2	GO:1901214	inorganic ion homeostasis	GO_BiologicalProcess-EBI-UniProt-GOA-ACAP-ARAP_25.05.2022_00h00	1.11236e-06	4.13563e-06	[4, 6, 8, 9]	Group468	22.5	[4	4
CCNG1	GO:0010468	positive regulation of cellular catabolic process	GO_BiologicalProcess-EBI-UniProt-GOA-ACAP-ARAP_25.05.2022_00h00	3.98065e-14	7.21364e-13	[4, 5]	Group587	4.98137	[4	4		SOX9	GO:0043388	MAP kinase activity	GO_BiologicalProcess-EBI-UniProt-GOA-ACAP-ARAP_25.05.2022_00h00	1.11236e-06	4.13563e-06	[4, 6, 8, 9]	Group516	22.5	[4	4
TRAM1	GO:0007417	protein catabolic process	GO_BiologicalProcess-EBI-UniProt-GOA-ACAP-ARAP_25.05.2022_00h00	5.96237e-14	1.04417e-12	[4, 5, 6]	Group529	7.70578	[4	4		ATP2B4	GO:0090066	myelination in peripheral nervous system	GO_BiologicalProcess-EBI-UniProt-GOA-ACAP-ARAP_25.05.2022_00h00	1.11236e-06	4.13563e-06	[4, 6, 8, 9]	Group474	22.5	[4	4
TMED7	GO:0007417	protein stabilization	GO_BiologicalProcess-EBI-UniProt-GOA-ACAP-ARAP_25.05.2022_00h00	5.96237e-14	1.04417e-12	[4, 5, 6]	Group587	7.70578	[4	4		IST1	GO:0090148	aspartate transmembrane transport	GO_BiologicalProcess-EBI-UniProt-GOA-ACAP-ARAP_25.05.2022_00h00	1.13701e-06	4.21091e-06	[4, 5, 6, 7, 8]	Group236	6.41026	[4	4
CNDP2	GO:0007417	regulation of autophagy	GO_BiologicalProcess-EBI-UniProt-GOA-ACAP-ARAP_25.05.2022_00h00	5.96237e-14	1.04417e-12	[4, 5, 6]	Group487	7.70578	[4	4		SLC25A1	GO:0010801	response to hypoxia	GO_BiologicalProcess-EBI-UniProt-GOA-ACAP-ARAP_25.05.2022_00h00	1.13701e-06	4.21091e-06	[4, 5, 6, 7, 8]	Group228	6.41026	[4	4
FAR1	GO:1902533	regulation of actin filament-based process	GO_BiologicalProcess-EBI-UniProt-GOA-ACAP-ARAP_25.05.2022_00h00	1.59226e-13	2.61281e-12	[4, 5, 6, 7]	Group587	7.80075	[4	4		KCNQ2	GO:0000902	establishment or maintenance of epithelial cell apical/basal polarity	GO_BiologicalProcess-EBI-UniProt-GOA-ACAP-ARAP_25.05.2022_00h00	1.23548e-06	4.51434e-06	[4, 5, 6]	Group449	5.31915	[4	4
CISD2	GO:1901214	nucleobase-containing compound biosynthetic process	GO_BiologicalProcess-EBI-UniProt-GOA-ACAP-ARAP_25.05.2022_00h00	2.1978e-13	3.49635e-12	[4, 5]	Group587	12.2093	[4	4		GPS1	GO:0031324	homeostatic process	GO_BiologicalProcess-EBI-UniProt-GOA-ACAP-ARAP_25.05.2022_00h00	1.23548e-06	4.51434e-06	[4, 5, 6]	Group356	5.31915	[4	4
CFL2	GO:0031344	histone modification	GO_BiologicalProcess-EBI-UniProt-GOA-ACAP-ARAP_25.05.2022_00h00	1.60014e-08	9.52772e-08	[4, 5]	Group393	7.49319	[4	4		CRK	GO:0032870	type I interferon production	GO_BiologicalProcess-EBI-UniProt-GOA-ACAP-ARAP_25.05.2022_00h00	1.23548e-06	4.51434e-06	[4, 5, 6]	Group526	5.31915	[4	4
IL17RB	GO:0031344	membrane organization	GO_BiologicalProcess-EBI-UniProt-GOA-ACAP-ARAP_25.05.2022_00h00	1.60014e-08	9.52772e-08	[4, 5]	Group587	7.49319	[4	4		FUBP1	GO:0030155	regulation of response to stimulus	GO_BiologicalProcess-EBI-UniProt-GOA-ACAP-ARAP_25.05.2022_00h00	1.32386e-06	4.79148e-06	[4, 5, 6]	Group525	4.48244	[4	4
KRCC1	GO:0031344	positive regulation of nucleocytoplasmic transport	GO_BiologicalProcess-EBI-UniProt-GOA-ACAP-ARAP_25.05.2022_00h00	1.60014e-08	9.52772e-08	[4, 5]	Group584	7.49319	[4	4		TMEM132A	GO:0010038	negative regulation of histone methylation	GO_BiologicalProcess-EBI-UniProt-GOA-ACAP-ARAP_25.05.2022_00h00	1.49161e-06	5.33794e-06	[4, 5, 6]	Group407	16.9231	[4	4
CAMTA1	GO:0031344	stem cell population maintenance	GO_BiologicalProcess-EBI-UniProt-GOA-ACAP-ARAP_25.05.2022_00h00	1.60014e-08	9.52772e-08	[4, 5]	Group538	7.49319	[4	4		KAT2B	GO:0051128	regeneration	GO_BiologicalProcess-EBI-UniProt-GOA-ACAP-ARAP_25.05.2022_00h00	1.49161e-06	5.33794e-06	[4, 5, 6]	Group339	16.9231	[4	4
NFE2L2	GO:0031344	transcription by RNA polymerase II	GO_BiologicalProcess-EBI-UniProt-GOA-ACAP-ARAP_25.05.2022_00h00	1.60014e-08	9.52772e-08	[4, 5]	Group396	7.49319	[4	4		AP1B1	GO:0035295	positive regulation of actin filament polymerization	GO_BiologicalProcess-EBI-UniProt-GOA-ACAP-ARAP_25.05.2022_00h00	1.78149e-06	6.25815e-06	[4, 5]	Group439	10.2857	[4	4
RETSAT	GO:0010634	stress-activated protein kinase signaling cascade	GO_BiologicalProcess-EBI-UniProt-GOA-ACAP-ARAP_25.05.2022_00h00	1.74647e-08	1.01951e-07	[4, 5, 6, 7]	Group587	13.5802	[4	4		RBM42	GO:0048729	negative regulation of cardiac muscle hypertrophy	GO_BiologicalProcess-EBI-UniProt-GOA-ACAP-ARAP_25.05.2022_00h00	1.96456e-06	6.8384e-06	[4, 6]	Group377	30.4348	[4	4
MAT2B	GO:0010634	voluntary musculoskeletal movement	GO_BiologicalProcess-EBI-UniProt-GOA-ACAP-ARAP_25.05.2022_00h00	1.74647e-08	1.01951e-07	[4, 5, 6, 7]	Group428	13.5802	[4	4		SRRM1	GO:0043549	hematopoietic stem cell differentiation	GO_BiologicalProcess-EBI-UniProt-GOA-ACAP-ARAP_25.05.2022_00h00	2.03742e-06	7.05347e-06	[4, 5, 6, 7]	Group483	16.4179	[4	4
SEPT11	GO:0031032	negative regulation of epithelial cell proliferation	GO_BiologicalProcess-EBI-UniProt-GOA-ACAP-ARAP_25.05.2022_00h00	3.73217e-08	2.08521e-07	[4, 7]	Group584	11.7371	[4	4		EFR3A	GO:0072697	muscle cell differentiation	GO_BiologicalProcess-EBI-UniProt-GOA-ACAP-ARAP_25.05.2022_00h00	2.03742e-06	7.05347e-06	[4, 5, 6, 7]	Group520	16.4179	[4	4
KDM1A	GO:0031032	regulation of leukocyte differentiation	GO_BiologicalProcess-EBI-UniProt-GOA-ACAP-ARAP_25.05.2022_00h00	3.73217e-08	2.08521e-07	[4, 7]	Group352	11.7371	[4	4		ITGB1	GO:0009895	proteolysis involved in protein catabolic process	GO_BiologicalProcess-EBI-UniProt-GOA-ACAP-ARAP_25.05.2022_00h00	2.03742e-06	7.05347e-06	[4, 5, 6, 7]	Group109	16.4179	[4	4
CTNND1	GO:0060284	amyloid-beta clearance by transcytosis	GO_BiologicalProcess-EBI-UniProt-GOA-ACAP-ARAP_25.05.2022_00h00	4.15378e-08	2.30225e-07	[4, 5]	Group487	8.16327	[4	4		ARPC5L	GO:0032989	positive regulation of phosphoprotein phosphatase activity	GO_BiologicalProcess-EBI-UniProt-GOA-ACAP-ARAP_25.05.2022_00h00	2.26862e-06	7.8255e-06	[4, 6, 7, 8, 9]	Group527	18.1818	[4	4
TAB2	GO:0060284	neuron intrinsic apoptotic signaling pathway in response to oxidative stress	GO_BiologicalProcess-EBI-UniProt-GOA-ACAP-ARAP_25.05.2022_00h00	4.15378e-08	2.30225e-07	[4, 5]	Group515	8.16327	[4	4		S100A11	GO:0061323	aspartic-type endopeptidase activity involved in amyloid precursor protein catabolic process	GO_BiologicalProcess-EBI-UniProt-GOA-ACAP-ARAP_25.05.2022_00h00	2.35198e-06	8.09846e-06	[4, 5, 6]	Group498	7.96178	[4	4
XPO1	GO:0060284	regulation of amyloid fibril formation	GO_BiologicalProcess-EBI-UniProt-GOA-ACAP-ARAP_25.05.2022_00h00	4.15378e-08	2.30225e-07	[4, 5]	Group443	8.16327	[4	4		DDR1	GO:0032868	regulation of cellular response to stress	GO_BiologicalProcess-EBI-UniProt-GOA-ACAP-ARAP_25.05.2022_00h00	2.35198e-06	8.09846e-06	[4, 5, 6]	Group490	7.96178	[4	4
EIF2B5	GO:0060284	regulation of oxidative stress-induced neuron intrinsic apoptotic signaling pathway	GO_BiologicalProcess-EBI-UniProt-GOA-ACAP-ARAP_25.05.2022_00h00	4.15378e-08	2.30225e-07	[4, 5]	Group587	8.16327	[4	4		TPM2	GO:0042063	leukocyte apoptotic process	GO_BiologicalProcess-EBI-UniProt-GOA-ACAP-ARAP_25.05.2022_00h00	2.40351e-06	8.261e-06	[4, 5, 6]	Group401	6.57895	[4	4
TRMT1	GO:0016482	myeloid cell homeostasis	GO_BiologicalProcess-EBI-UniProt-GOA-ACAP-ARAP_25.05.2022_00h00	4.95915e-08	2.70546e-07	[4, 5]	Group301	12.3656	[4	4		SERP1	GO:0010646	positive regulation of protein serine/threonine kinase activity	GO_BiologicalProcess-EBI-UniProt-GOA-ACAP-ARAP_25.05.2022_00h00	3.2308e-06	1.07562e-05	[4, 5, 6, 7, 8]	Group525	4.83221	[4	4
RBM22	GO:0016482	response to estradiol	GO_BiologicalProcess-EBI-UniProt-GOA-ACAP-ARAP_25.05.2022_00h00	4.95915e-08	2.70546e-07	[4, 5]	Group311	12.3656	[4	4		EHMT2	GO:0031098	cellular response to glucose stimulus	GO_BiologicalProcess-EBI-UniProt-GOA-ACAP-ARAP_25.05.2022_00h00	3.54585e-06	1.17032e-05	[4, 5]	Group449	6.56371	[4	4
FAM120A	GO:0060716	negative regulation of protein localization	GO_BiologicalProcess-EBI-UniProt-GOA-ACAP-ARAP_25.05.2022_00h00	5.34058e-08	2.90595e-07	[4, 5, 6, 7, 8, 9, 10]	Group444	36	[4	4		ADIPOR2	GO:0032880	negative regulation of protein localization to plasma membrane	GO_BiologicalProcess-EBI-UniProt-GOA-ACAP-ARAP_25.05.2022_00h00	4.13254e-06	1.33852e-05	[4, 5, 6, 7]	Group523	6.39854	[4	4
TSC1	GO:0060716	regulation of G1/S transition of mitotic cell cycle	GO_BiologicalProcess-EBI-UniProt-GOA-ACAP-ARAP_25.05.2022_00h00	5.34058e-08	2.90595e-07	[4, 5, 6, 7, 8, 9, 10]	Group534	36	[4	4		CPSF1	GO:2000145	positive regulation of mRNA metabolic process	GO_BiologicalProcess-EBI-UniProt-GOA-ACAP-ARAP_25.05.2022_00h00	4.13254e-06	1.33852e-05	[4, 5, 6, 7]	Group498	6.39854	[4	4
ANLN	GO:0060716	regulation of I-kappaB kinase/NF-kappaB signaling	GO_BiologicalProcess-EBI-UniProt-GOA-ACAP-ARAP_25.05.2022_00h00	5.34058e-08	2.90595e-07	[4, 5, 6, 7, 8, 9, 10]	Group583	36	[4	4		NAT14	GO:0045165	amyloid fibril formation	GO_BiologicalProcess-EBI-UniProt-GOA-ACAP-ARAP_25.05.2022_00h00	4.55961e-06	1.46691e-05	[4, 6]	Group374	6.05144	[4	4
SYPL1	GO:0048666	regulation of myeloid cell differentiation	GO_BiologicalProcess-EBI-UniProt-GOA-ACAP-ARAP_25.05.2022_00h00	5.65372e-08	3.04454e-07	[4, 5, 7, 8, 9]	Group587	6.27615	[4	4		EMD	GO:0048731	ion channel inhibitor activity	GO_BiologicalProcess-EBI-UniProt-GOA-ACAP-ARAP_25.05.2022_00h00	4.55961e-06	1.46691e-05	[4, 6]	Group365	6.05144	[4	4
SOCS7	GO:0045934	establishment of protein localization to mitochondrion	GO_BiologicalProcess-EBI-UniProt-GOA-ACAP-ARAP_25.05.2022_00h00	5.89085e-08	3.15592e-07	[4, 5, 6]	Group587	5.77041	[4	4		COPZ1	GO:0030335	cell communication involved in cardiac conduction	GO_BiologicalProcess-EBI-UniProt-GOA-ACAP-ARAP_25.05.2022_00h00	4.82229e-06	1.53334e-05	[4, 5]	Group479	8.57143	[4	4
DUT	GO:0006259	aorta development	GO_BiologicalProcess-EBI-UniProt-GOA-ACAP-ARAP_25.05.2022_00h00	5.98757e-08	3.19133e-07	[4, 5, 6]	Group322	6.38298	[4	4		VPS51	GO:0060996	negative regulation of cellular biosynthetic process	GO_BiologicalProcess-EBI-UniProt-GOA-ACAP-ARAP_25.05.2022_00h00	4.82229e-06	1.53334e-05	[4, 5]	Group527	8.57143	[4	4
UBA3	GO:0006259	cellular macromolecule biosynthetic process	GO_BiologicalProcess-EBI-UniProt-GOA-ACAP-ARAP_25.05.2022_00h00	5.98757e-08	3.19133e-07	[4, 5, 6]	Group121	6.38298	[4	4		GRM4	GO:0010810	negative regulation of extrinsic apoptotic signaling pathway	GO_BiologicalProcess-EBI-UniProt-GOA-ACAP-ARAP_25.05.2022_00h00	4.81728e-06	1.5343e-05	[4, 5, 6]	Group460	4.67066	[4	4
PPM1G	GO:0006259	cytoskeleton-dependent cytokinesis	GO_BiologicalProcess-EBI-UniProt-GOA-ACAP-ARAP_25.05.2022_00h00	5.98757e-08	3.19133e-07	[4, 5, 6]	Group492	6.38298	[4	4		GOLPH3	GO:0001932	regulation of cell motility	GO_BiologicalProcess-EBI-UniProt-GOA-ACAP-ARAP_25.05.2022_00h00	4.81728e-06	1.5343e-05	[4, 5, 6]	Group525	4.67066	[4	4
BUD31	GO:0006259	negative regulation of transmembrane receptor protein serine/threonine kinase signaling pathway	GO_BiologicalProcess-EBI-UniProt-GOA-ACAP-ARAP_25.05.2022_00h00	5.98757e-08	3.19133e-07	[4, 5, 6]	Group561	6.38298	[4	4		PARP1	GO:0006886	cell junction organization	GO_BiologicalProcess-EBI-UniProt-GOA-ACAP-ARAP_25.05.2022_00h00	4.95413e-06	1.57004e-05	[4, 5]	Group468	6.38298	[4	4
ALCAM	GO:0050678	endothelial cell differentiation	GO_BiologicalProcess-EBI-UniProt-GOA-ACAP-ARAP_25.05.2022_00h00	6.78179e-08	3.55107e-07	[4, 5]	Group415	8.88889	[4	4		PIGT	GO:0044089	mammary gland development	GO_BiologicalProcess-EBI-UniProt-GOA-ACAP-ARAP_25.05.2022_00h00	4.95413e-06	1.57004e-05	[4, 5]	Group388	6.38298	[4	4
PODXL	GO:0050678	establishment of epithelial cell polarity	GO_BiologicalProcess-EBI-UniProt-GOA-ACAP-ARAP_25.05.2022_00h00	6.78179e-08	3.55107e-07	[4, 5]	Group509	8.88889	[4	4		PGD	GO:0034764	positive regulation of protein autophosphorylation	GO_BiologicalProcess-EBI-UniProt-GOA-ACAP-ARAP_25.05.2022_00h00	4.95413e-06	1.57004e-05	[4, 5]	Group527	6.38298	[4	4
MYRF	GO:0050678	negative regulation of cell projection organization	GO_BiologicalProcess-EBI-UniProt-GOA-ACAP-ARAP_25.05.2022_00h00	6.78179e-08	3.55107e-07	[4, 5]	Group215	8.88889	[4	4		PPIB	GO:0006810	positive regulation of transport	GO_BiologicalProcess-EBI-UniProt-GOA-ACAP-ARAP_25.05.2022_00h00	4.95413e-06	1.57004e-05	[4, 5]	Group439	6.38298	[4	4
TTC37	GO:0050678	regulation of glial cell proliferation	GO_BiologicalProcess-EBI-UniProt-GOA-ACAP-ARAP_25.05.2022_00h00	6.78179e-08	3.55107e-07	[4, 5]	Group587	8.88889	[4	4		ZC3H11A	GO:0051345	vascular endothelial cell proliferation	GO_BiologicalProcess-EBI-UniProt-GOA-ACAP-ARAP_25.05.2022_00h00	4.95413e-06	1.57004e-05	[4, 5]	Group521	6.38298	[4	4
FGFR1	GO:0090092	cellular response to radiation	GO_BiologicalProcess-EBI-UniProt-GOA-ACAP-ARAP_25.05.2022_00h00	1.10251e-05	3.61264e-05	[4, 5, 6, 7, 8]	Group574	8.65052	[4	4		RAP2A	GO:0021781	positive regulation of binding	GO_BiologicalProcess-EBI-UniProt-GOA-ACAP-ARAP_25.05.2022_00h00	5.49624e-06	1.73322e-05	[4, 5, 6, 7, 8]	Group525	4.47071	[4	4
EPB41L2	GO:0090092	production of molecular mediator of immune response	GO_BiologicalProcess-EBI-UniProt-GOA-ACAP-ARAP_25.05.2022_00h00	1.10251e-05	3.61264e-05	[4, 5, 6, 7, 8]	Group583	8.65052	[4	4		STAT2	GO:0033627	B cell activation	GO_BiologicalProcess-EBI-UniProt-GOA-ACAP-ARAP_25.05.2022_00h00	6.93063e-06	2.13965e-05	[4, 5]	Group435	6.2069	[4	4
BMI1	GO:0048261	astrocyte activation	GO_BiologicalProcess-EBI-UniProt-GOA-ACAP-ARAP_25.05.2022_00h00	1.10058e-05	3.61768e-05	[4, 5, 6, 7, 8]	Group533	23.5294	[4	4		DBN1	GO:1990874	positive regulation of cell cycle	GO_BiologicalProcess-EBI-UniProt-GOA-ACAP-ARAP_25.05.2022_00h00	6.93063e-06	2.13965e-05	[4, 5]	Group526	6.2069	[4	4
TWF1	GO:0048261	microvillus assembly	GO_BiologicalProcess-EBI-UniProt-GOA-ACAP-ARAP_25.05.2022_00h00	1.10058e-05	3.61768e-05	[4, 5, 6, 7, 8]	Group232	23.5294	[4	4		MFSD10	GO:0031346	modulation of chemical synaptic transmission	GO_BiologicalProcess-EBI-UniProt-GOA-ACAP-ARAP_25.05.2022_00h00	7.97338e-06	2.43016e-05	[4, 5, 6, 7]	Group464	18	[4	4
LARS	GO:0043467	cellular glucose homeostasis	GO_BiologicalProcess-EBI-UniProt-GOA-ACAP-ARAP_25.05.2022_00h00	1.35145e-05	4.29333e-05	[4, 5]	Group493	11.5108	[4	4		HNRNPD	GO:0008654	positive regulation of cellular metabolic process	GO_BiologicalProcess-EBI-UniProt-GOA-ACAP-ARAP_25.05.2022_00h00	7.97338e-06	2.43016e-05	[4, 5, 6, 7]	Group498	18	[4	4
YARS	GO:0043467	negative regulation of histone modification	GO_BiologicalProcess-EBI-UniProt-GOA-ACAP-ARAP_25.05.2022_00h00	1.35145e-05	4.29333e-05	[4, 5]	Group364	11.5108	[4	4		API5	GO:0051239	associative learning	GO_BiologicalProcess-EBI-UniProt-GOA-ACAP-ARAP_25.05.2022_00h00	8.25943e-06	2.50536e-05	[4, 5, 6]	Group407	14.2857	[4	4
CX3CL1	GO:0043467	regulation of mitochondrion organization	GO_BiologicalProcess-EBI-UniProt-GOA-ACAP-ARAP_25.05.2022_00h00	1.35145e-05	4.29333e-05	[4, 5]	Group513	11.5108	[4	4		CAPRIN1	GO:0060341	regulation of organ growth	GO_BiologicalProcess-EBI-UniProt-GOA-ACAP-ARAP_25.05.2022_00h00	8.25943e-06	2.50536e-05	[4, 5, 6]	Group339	14.2857	[4	4
PRKCA	GO:0043467	thymus development	GO_BiologicalProcess-EBI-UniProt-GOA-ACAP-ARAP_25.05.2022_00h00	1.35145e-05	4.29333e-05	[4, 5]	Group399	11.5108	[4	4		AP3D1	GO:0002275	protein modification process	GO_BiologicalProcess-EBI-UniProt-GOA-ACAP-ARAP_25.05.2022_00h00	9.15192e-06	2.74989e-05	[4, 5, 6]	Group405	6.03175	[4	4
DDB1	GO:0030324	negative regulation of cell cycle process	GO_BiologicalProcess-EBI-UniProt-GOA-ACAP-ARAP_25.05.2022_00h00	1.36593e-05	4.32613e-05	[4, 5, 6]	Group418	9.80392	[4	4		HSPA4	GO:1900542	stem cell population maintenance	GO_BiologicalProcess-EBI-UniProt-GOA-ACAP-ARAP_25.05.2022_00h00	1.04951e-05	3.12888e-05	[4, 5, 6]	Group460	4.61923	[4	4
ADH5	GO:0030324	negative regulation of proteolysis	GO_BiologicalProcess-EBI-UniProt-GOA-ACAP-ARAP_25.05.2022_00h00	1.36593e-05	4.32613e-05	[4, 5, 6]	Group504	9.80392	[4	4		CAB39	GO:1903076	leukocyte cell-cell adhesion	GO_BiologicalProcess-EBI-UniProt-GOA-ACAP-ARAP_25.05.2022_00h00	1.11482e-05	3.28769e-05	[4, 5, 6, 7]	Group455	17.3077	[4	4
SNX6	GO:0030324	organic cyclic compound catabolic process	GO_BiologicalProcess-EBI-UniProt-GOA-ACAP-ARAP_25.05.2022_00h00	1.36593e-05	4.32613e-05	[4, 5, 6]	Group552	9.80392	[4	4		ILF3	GO:0048024	response to dsRNA	GO_BiologicalProcess-EBI-UniProt-GOA-ACAP-ARAP_25.05.2022_00h00	1.11482e-05	3.28769e-05	[4, 5, 6, 7]	Group368	17.3077	[4	4
SH3PXD2A	GO:0030324	protein methylation	GO_BiologicalProcess-EBI-UniProt-GOA-ACAP-ARAP_25.05.2022_00h00	1.36593e-05	4.32613e-05	[4, 5, 6]	Group550	9.80392	[4	4		BTG2	GO:0048041	cellular divalent inorganic cation homeostasis	GO_BiologicalProcess-EBI-UniProt-GOA-ACAP-ARAP_25.05.2022_00h00	1.15393e-05	3.37698e-05	[4, 5]	Group527	8.3682	[4	4
PIK3R1	GO:0030324	regulation of centriole replication	GO_BiologicalProcess-EBI-UniProt-GOA-ACAP-ARAP_25.05.2022_00h00	1.36593e-05	4.32613e-05	[4, 5, 6]	Group565	9.80392	[4	4		KDELR1	GO:0051252	vesicle-mediated transport	GO_BiologicalProcess-EBI-UniProt-GOA-ACAP-ARAP_25.05.2022_00h00	1.35047e-05	3.90432e-05	[4, 5, 6, 7, 8]	Group298	7.20461	[4	4
PTPN23	GO:0007249	positive regulation of transcription from RNA polymerase II promoter in response to stress	GO_BiologicalProcess-EBI-UniProt-GOA-ACAP-ARAP_25.05.2022_00h00	1.39577e-05	4.40057e-05	[4, 5, 6]	Group108	8.53242	[4	4		OSTF1	GO:0034097	response to light stimulus	GO_BiologicalProcess-EBI-UniProt-GOA-ACAP-ARAP_25.05.2022_00h00	1.35686e-05	3.91684e-05	[4, 5, 6, 7, 9, 10]	Group523	13.5802	[4	4
FOXO3	GO:0031669	regulation of stem cell proliferation	GO_BiologicalProcess-EBI-UniProt-GOA-ACAP-ARAP_25.05.2022_00h00	1.40455e-05	4.42157e-05	[4, 5]	Group412	9.20502	[4	4		TUG1	GO:0043085	vesicle-mediated transport in synapse	GO_BiologicalProcess-EBI-UniProt-GOA-ACAP-ARAP_25.05.2022_00h00	1.66189e-05	4.69109e-05	[4, 5]	Group385	10.0671	[4	4
METAP2	GO:0007219	negative regulation of proteasomal ubiquitin-dependent protein catabolic process	GO_BiologicalProcess-EBI-UniProt-GOA-ACAP-ARAP_25.05.2022_00h00	1.68606e-05	5.24441e-05	[4, 5, 6]	Group566	10	[4	4		SEC61A1	GO:0010812	columnar/cuboidal epithelial cell differentiation	GO_BiologicalProcess-EBI-UniProt-GOA-ACAP-ARAP_25.05.2022_00h00	1.80051e-05	5.03774e-05	[4, 6, 7, 8, 9, 10, 11, 12]	Group524	10	[4	4
CDK5	GO:0007219	regulation of endothelial cell differentiation	GO_BiologicalProcess-EBI-UniProt-GOA-ACAP-ARAP_25.05.2022_00h00	1.68606e-05	5.24441e-05	[4, 5, 6]	Group150	10	[4	4		G3BP2	GO:0023056	integrin-mediated signaling pathway	GO_BiologicalProcess-EBI-UniProt-GOA-ACAP-ARAP_25.05.2022_00h00	1.80051e-05	5.03774e-05	[4, 6, 7, 8, 9, 10, 11, 12]	Group301	10	[4	4
DCAF7	GO:0048858	positive regulation of cell morphogenesis involved in differentiation	GO_BiologicalProcess-EBI-UniProt-GOA-ACAP-ARAP_25.05.2022_00h00	1.70044e-05	5.28124e-05	[4, 5, 6]	Group587	6.47482	[4	4		S100A16	GO:0031589	negative regulation of miRNA transcription	GO_BiologicalProcess-EBI-UniProt-GOA-ACAP-ARAP_25.05.2022_00h00	2.0472e-05	5.65348e-05	[4, 5]	Group526	6.41026	[4	4
ESYT2	GO:0048858	positive regulation of telomere maintenance via telomerase	GO_BiologicalProcess-EBI-UniProt-GOA-ACAP-ARAP_25.05.2022_00h00	1.70044e-05	5.28124e-05	[4, 5, 6]	Group517	6.47482	[4	4		C1QBP	GO:0031668	regulation of NMDA receptor activity	GO_BiologicalProcess-EBI-UniProt-GOA-ACAP-ARAP_25.05.2022_00h00	2.5684e-05	6.95215e-05	[4, 5, 6]	Group320	8.18966	[4	4
RPRD1A	GO:0006986	ubiquitin-protein transferase activity	GO_BiologicalProcess-EBI-UniProt-GOA-ACAP-ARAP_25.05.2022_00h00	1.77124e-05	5.4848e-05	[4, 5]	Group306	11.2676	[4	4		COPG1	GO:0008406	substrate adhesion-dependent cell spreading	GO_BiologicalProcess-EBI-UniProt-GOA-ACAP-ARAP_25.05.2022_00h00	2.81586e-05	7.56836e-05	[4, 5, 6, 7]	Group403	6.28931	[4	4
TBC1D9	GO:0030100	leukocyte apoptotic process	GO_BiologicalProcess-EBI-UniProt-GOA-ACAP-ARAP_25.05.2022_00h00	2.03146e-05	6.17138e-05	[4, 5, 6]	Group533	9.2511	[4	4		GPAA1	GO:0002520	actin filament network formation	GO_BiologicalProcess-EBI-UniProt-GOA-ACAP-ARAP_25.05.2022_00h00	3.32093e-05	8.78989e-05	[4, 5, 6, 7, 8, 9, 10, 11]	Group527	17.3913	[4	4
C3orf18	GO:0051091	nuclear division	GO_BiologicalProcess-EBI-UniProt-GOA-ACAP-ARAP_25.05.2022_00h00	2.03063e-05	6.17787e-05	[4, 7, 8, 9, 10, 11, 12, 13, 14]	Group224	8.54093	[4	4		PSME1	GO:0045597	response to hormone	GO_BiologicalProcess-EBI-UniProt-GOA-ACAP-ARAP_25.05.2022_00h00	3.36617e-05	8.89729e-05	[4, 5, 6]	Group527	9.03955	[4	4
NASP	GO:0030856	positive regulation of ERBB signaling pathway	GO_BiologicalProcess-EBI-UniProt-GOA-ACAP-ARAP_25.05.2022_00h00	2.12079e-05	6.39613e-05	[4, 5, 6]	Group266	10.625	[4	4		LRP1	GO:0051099	animal organ regeneration	GO_BiologicalProcess-EBI-UniProt-GOA-ACAP-ARAP_25.05.2022_00h00	3.84348e-05	0.00010034	[4, 7, 8, 9, 10, 11, 12, 13, 14]	Group335	7.47331	[4	4
CTSA	GO:0030856	protein kinase activator activity	GO_BiologicalProcess-EBI-UniProt-GOA-ACAP-ARAP_25.05.2022_00h00	2.12079e-05	6.39613e-05	[4, 5, 6]	Group550	10.625	[4	4		RALB	GO:0009725	regulation of sister chromatid segregation	GO_BiologicalProcess-EBI-UniProt-GOA-ACAP-ARAP_25.05.2022_00h00	3.84348e-05	0.00010034	[4, 7, 8, 9, 10, 11, 12, 13, 14]	Group179	7.47331	[4	4
USP47	GO:0030856	regulation of autophagy of mitochondrion	GO_BiologicalProcess-EBI-UniProt-GOA-ACAP-ARAP_25.05.2022_00h00	2.12079e-05	6.39613e-05	[4, 5, 6]	Group216	10.625	[4	4		CTBP1	GO:0035556	negative regulation of DNA-binding transcription factor activity	GO_BiologicalProcess-EBI-UniProt-GOA-ACAP-ARAP_25.05.2022_00h00	4.41986e-05	0.000113832	[4, 5, 6, 7]	Group521	8.83978	[4	4
AKR7A2	GO:0030856	regulation of mitochondrial membrane potential	GO_BiologicalProcess-EBI-UniProt-GOA-ACAP-ARAP_25.05.2022_00h00	2.12079e-05	6.39613e-05	[4, 5, 6]	Group415	10.625	[4	4		SUCLA2	GO:0034248	smooth muscle tissue development	GO_BiologicalProcess-EBI-UniProt-GOA-ACAP-ARAP_25.05.2022_00h00	4.41986e-05	0.000113832	[4, 5, 6, 7]	Group446	8.83978	[4	4
CHTOP	GO:0030856	response to heat	GO_BiologicalProcess-EBI-UniProt-GOA-ACAP-ARAP_25.05.2022_00h00	2.12079e-05	6.39613e-05	[4, 5, 6]	Group552	10.625	[4	4		EIF4G1	GO:0002009	attachment of spindle microtubules to kinetochore	GO_BiologicalProcess-EBI-UniProt-GOA-ACAP-ARAP_25.05.2022_00h00	5.41565e-05	0.000136715	[4, 5, 6]	Group426	5.94595	[4	4
MAP3K12	GO:0009267	negative regulation of extrinsic apoptotic signaling pathway	GO_BiologicalProcess-EBI-UniProt-GOA-ACAP-ARAP_25.05.2022_00h00	2.2267e-05	6.65775e-05	[4, 5, 6]	Group412	10.1695	[4	4		S1PR1	GO:0007267	postsynaptic membrane organization	GO_BiologicalProcess-EBI-UniProt-GOA-ACAP-ARAP_25.05.2022_00h00	6.73669e-05	0.0001659	[4, 5]	Group368	7.63052	[4	4
SCAMP1	GO:0009267	substantia nigra development	GO_BiologicalProcess-EBI-UniProt-GOA-ACAP-ARAP_25.05.2022_00h00	2.2267e-05	6.65775e-05	[4, 5, 6]	Group107	10.1695	[4	4		CRKL	GO:0060627	MyD88-dependent toll-like receptor signaling pathway	GO_BiologicalProcess-EBI-UniProt-GOA-ACAP-ARAP_25.05.2022_00h00	6.78014e-05	0.000166755	[4, 5, 7, 8, 9, 10, 11, 12, 13]	Group461	8.92857	[4	4
CRAT	GO:0048545	cellular response to heat	GO_BiologicalProcess-EBI-UniProt-GOA-ACAP-ARAP_25.05.2022_00h00	2.52859e-05	7.464e-05	[4, 5]	Group587	7.67196	[4	4		CDC42BPB	GO:0080134	cardiac muscle tissue growth	GO_BiologicalProcess-EBI-UniProt-GOA-ACAP-ARAP_25.05.2022_00h00	7.69556e-05	0.00018639	[4, 5, 6, 7]	Group483	6.6313	[4	4
FLNA	GO:0048545	glial cell activation	GO_BiologicalProcess-EBI-UniProt-GOA-ACAP-ARAP_25.05.2022_00h00	2.52859e-05	7.464e-05	[4, 5]	Group530	7.67196	[4	4		BCL6	GO:0010604	regulation of smooth muscle cell differentiation	GO_BiologicalProcess-EBI-UniProt-GOA-ACAP-ARAP_25.05.2022_00h00	7.69556e-05	0.00018639	[4, 5, 6, 7]	Group520	6.6313	[4	4
TIMM13	GO:0048545	negative regulation of cardiac muscle cell proliferation	GO_BiologicalProcess-EBI-UniProt-GOA-ACAP-ARAP_25.05.2022_00h00	2.52859e-05	7.464e-05	[4, 5]	Group505	7.67196	[4	4		TAGLN2	GO:0031669	B cell proliferation	GO_BiologicalProcess-EBI-UniProt-GOA-ACAP-ARAP_25.05.2022_00h00	7.74973e-05	0.000187465	[4, 5]	Group527	7.11864	[4	4
WRB	GO:0048545	positive regulation of histone methylation	GO_BiologicalProcess-EBI-UniProt-GOA-ACAP-ARAP_25.05.2022_00h00	2.52859e-05	7.464e-05	[4, 5]	Group578	7.67196	[4	4		SRSF7	GO:0060485	intracellular ligand-gated ion channel activity	GO_BiologicalProcess-EBI-UniProt-GOA-ACAP-ARAP_25.05.2022_00h00	8.2025e-05	0.000196922	[4, 5, 6, 7, 8, 9, 10, 11]	Group438	75	[4	4
HDAC11	GO:0071456	phospholipid metabolic process	GO_BiologicalProcess-EBI-UniProt-GOA-ACAP-ARAP_25.05.2022_00h00	2.73193e-05	7.98505e-05	[4, 6]	Group560	10.8844	[4	4		PLPP3	GO:0001952	fat cell differentiation	GO_BiologicalProcess-EBI-UniProt-GOA-ACAP-ARAP_25.05.2022_00h00	8.22455e-05	0.000197204	[4, 5]	Group246	11.2245	[4	4
SMARCD2	GO:0071456	regulation of cardiac muscle cell proliferation	GO_BiologicalProcess-EBI-UniProt-GOA-ACAP-ARAP_25.05.2022_00h00	2.73193e-05	7.98505e-05	[4, 6]	Group537	10.8844	[4	4		TPM3	GO:0043549	Golgi organization	GO_BiologicalProcess-EBI-UniProt-GOA-ACAP-ARAP_25.05.2022_00h00	8.22455e-05	0.000197204	[4, 5]	Group130	11.2245	[4	4
SSRP1	GO:0043254	negative regulation of carbohydrate metabolic process	GO_BiologicalProcess-EBI-UniProt-GOA-ACAP-ARAP_25.05.2022_00h00	3.15028e-05	9.10565e-05	[4, 5, 6]	Group584	7.25624	[4	4		HP1BP3	GO:0051650	negative regulation of blood vessel endothelial cell migration	GO_BiologicalProcess-EBI-UniProt-GOA-ACAP-ARAP_25.05.2022_00h00	8.22455e-05	0.000197204	[4, 5]	Group513	11.2245	[4	4
DVL3	GO:0043254	regulation of chondrocyte differentiation	GO_BiologicalProcess-EBI-UniProt-GOA-ACAP-ARAP_25.05.2022_00h00	3.15028e-05	9.10565e-05	[4, 5, 6]	Group227	7.25624	[4	4		ATP6V1C1	GO:0032989	endothelium development	GO_BiologicalProcess-EBI-UniProt-GOA-ACAP-ARAP_25.05.2022_00h00	9.52315e-05	0.000225791	[4, 5, 6, 7]	Group514	15.0943	[4	4
LASP1	GO:0043254	unsaturated fatty acid biosynthetic process	GO_BiologicalProcess-EBI-UniProt-GOA-ACAP-ARAP_25.05.2022_00h00	3.15028e-05	9.10565e-05	[4, 5, 6]	Group104	7.25624	[4	4		OXCT1	GO:0032880	exploration behavior	GO_BiologicalProcess-EBI-UniProt-GOA-ACAP-ARAP_25.05.2022_00h00	0.000102667	0.000242516	[4, 5, 6]	Group506	9.55882	[4	4
ANAPC16	GO:1902882	cellular response to glucose stimulus	GO_BiologicalProcess-EBI-UniProt-GOA-ACAP-ARAP_25.05.2022_00h00	3.23775e-05	9.31972e-05	[4, 5]	Group572	12.6214	[4	4		SMARCB1	GO:0034250	cell projection assembly	GO_BiologicalProcess-EBI-UniProt-GOA-ACAP-ARAP_25.05.2022_00h00	0.00011531	0.000268401	[4, 5, 6, 7]	Group483	5.86011	[4	4
TPD52	GO:1902882	cytokinetic process	GO_BiologicalProcess-EBI-UniProt-GOA-ACAP-ARAP_25.05.2022_00h00	3.23775e-05	9.31972e-05	[4, 5]	Group560	12.6214	[4	4		MAPK1	GO:0021762	glucose transmembrane transport	GO_BiologicalProcess-EBI-UniProt-GOA-ACAP-ARAP_25.05.2022_00h00	0.00011531	0.000268401	[4, 5, 6, 7]	Group238	5.86011	[4	4
MCM7	GO:0002183	positive regulation of cell cycle G1/S phase transition	GO_BiologicalProcess-EBI-UniProt-GOA-ACAP-ARAP_25.05.2022_00h00	3.91834e-05	0.000110949	[4, 6, 7, 8, 9]	Group549	20	[4	4		FOS	GO:0060438	positive regulation of protein phosphorylation	GO_BiologicalProcess-EBI-UniProt-GOA-ACAP-ARAP_25.05.2022_00h00	0.00011531	0.000268401	[4, 5, 6, 7]	Group465	5.86011	[4	4
GPT2	GO:0031532	phosphatidylinositol phosphate biosynthetic process	GO_BiologicalProcess-EBI-UniProt-GOA-ACAP-ARAP_25.05.2022_00h00	3.97521e-05	0.000112406	[4, 7]	Group119	11.6667	[4	4		MPRIP	GO:1904925	macrophage differentiation	GO_BiologicalProcess-EBI-UniProt-GOA-ACAP-ARAP_25.05.2022_00h00	0.000122359	0.00028206	[4, 7]	Group199	10	[4	4
PACSIN2	GO:0010811	epithelial cell apoptotic process	GO_BiologicalProcess-EBI-UniProt-GOA-ACAP-ARAP_25.05.2022_00h00	4.1407e-05	0.000116454	[4, 5, 6]	Group584	11.0294	[4	4		LRRC8A	GO:0048708	neuron differentiation	GO_BiologicalProcess-EBI-UniProt-GOA-ACAP-ARAP_25.05.2022_00h00	0.000122359	0.00028206	[4, 7]	Group421	10	[4	4
STX5	GO:0010811	mismatch repair	GO_BiologicalProcess-EBI-UniProt-GOA-ACAP-ARAP_25.05.2022_00h00	4.1407e-05	0.000116454	[4, 5, 6]	Group582	11.0294	[4	4		MBNL2	GO:0030183	regulation of endocytosis	GO_BiologicalProcess-EBI-UniProt-GOA-ACAP-ARAP_25.05.2022_00h00	0.000128168	0.000292977	[4, 5, 6, 7, 8, 9]	Group520	9.35252	[4	4
TAC1	GO:0010811	negative regulation of endothelial cell proliferation	GO_BiologicalProcess-EBI-UniProt-GOA-ACAP-ARAP_25.05.2022_00h00	4.1407e-05	0.000116454	[4, 5, 6]	Group564	11.0294	[4	4		ARCN1	GO:1904356	dendritic spine development	GO_BiologicalProcess-EBI-UniProt-GOA-ACAP-ARAP_25.05.2022_00h00	0.00013288	0.000303024	[4, 5, 6]	Group408	26.3158	[4	4
RAF1	GO:0030111	enzyme inhibitor activity	GO_BiologicalProcess-EBI-UniProt-GOA-ACAP-ARAP_25.05.2022_00h00	4.17268e-05	0.00011688	[4, 5, 6, 7, 8]	Group101	7.78098	[4	4		SDC4	GO:0000380	epithelial cell proliferation involved in prostate gland development	GO_BiologicalProcess-EBI-UniProt-GOA-ACAP-ARAP_25.05.2022_00h00	0.00013288	0.000303024	[4, 5, 6]	Group477	26.3158	[4	4
MAX	GO:0030111	myoblast differentiation	GO_BiologicalProcess-EBI-UniProt-GOA-ACAP-ARAP_25.05.2022_00h00	4.17268e-05	0.00011688	[4, 5, 6, 7, 8]	Group575	7.78098	[4	4		C12orf57	GO:0031400	myeloid cell development	GO_BiologicalProcess-EBI-UniProt-GOA-ACAP-ARAP_25.05.2022_00h00	0.00013288	0.000303024	[4, 5, 6]	Group526	26.3158	[4	4
MCAM	GO:0030111	regulation of T cell proliferation	GO_BiologicalProcess-EBI-UniProt-GOA-ACAP-ARAP_25.05.2022_00h00	4.17268e-05	0.00011688	[4, 5, 6, 7, 8]	Group390	7.78098	[4	4		GNAI2	GO:0045785	postreplication repair	GO_BiologicalProcess-EBI-UniProt-GOA-ACAP-ARAP_25.05.2022_00h00	0.00013288	0.000303024	[4, 5, 6]	Group347	26.3158	[4	4
MFF	GO:1900182	branching morphogenesis of an epithelial tube	GO_BiologicalProcess-EBI-UniProt-GOA-ACAP-ARAP_25.05.2022_00h00	4.1726e-05	0.000117035	[4, 5, 6, 7, 8]	Group577	13.1868	[4	4		PQBP1	GO:0048699	endocrine pancreas development	GO_BiologicalProcess-EBI-UniProt-GOA-ACAP-ARAP_25.05.2022_00h00	0.00013427	0.000305464	[4, 5]	Group527	6.48649	[4	4
DEK	GO:0030857	B cell apoptotic process	GO_BiologicalProcess-EBI-UniProt-GOA-ACAP-ARAP_25.05.2022_00h00	5.09613e-05	0.000140481	[4, 5, 6, 7]	Group565	16.9811	[4	4		CRIP2	GO:0070849	negative regulation of autophagy	GO_BiologicalProcess-EBI-UniProt-GOA-ACAP-ARAP_25.05.2022_00h00	0.000135053	0.000306879	[4, 5]	Group442	5.46282	[4	4
C12orf10	GO:0030857	cytokine production	GO_BiologicalProcess-EBI-UniProt-GOA-ACAP-ARAP_25.05.2022_00h00	5.09613e-05	0.000140481	[4, 5, 6, 7]	Group586	16.9811	[4	4		ACTN4	GO:0030316	regulation of metabolic process	GO_BiologicalProcess-EBI-UniProt-GOA-ACAP-ARAP_25.05.2022_00h00	0.000135053	0.000306879	[4, 5]	Group520	5.46282	[4	4
ZNF83	GO:0030857	membrane fission	GO_BiologicalProcess-EBI-UniProt-GOA-ACAP-ARAP_25.05.2022_00h00	5.09613e-05	0.000140481	[4, 5, 6, 7]	Group266	16.9811	[4	4		PRKCB	GO:0009891	regulation of neurotransmitter uptake	GO_BiologicalProcess-EBI-UniProt-GOA-ACAP-ARAP_25.05.2022_00h00	0.000159099	0.000355599	[4, 5, 6]	Group524	6.38298	[4	4
LYPLA2	GO:0030857	neurotrophin signaling pathway	GO_BiologicalProcess-EBI-UniProt-GOA-ACAP-ARAP_25.05.2022_00h00	5.09613e-05	0.000140481	[4, 5, 6, 7]	Group151	16.9811	[4	4		NDUFS4	GO:0055082	regulation of synaptic plasticity	GO_BiologicalProcess-EBI-UniProt-GOA-ACAP-ARAP_25.05.2022_00h00	0.000159099	0.000355599	[4, 5, 6]	Group401	6.38298	[4	4
BOD1	GO:0030857	oligodendrocyte development	GO_BiologicalProcess-EBI-UniProt-GOA-ACAP-ARAP_25.05.2022_00h00	5.09613e-05	0.000140481	[4, 5, 6, 7]	Group216	16.9811	[4	4		MAF1	GO:1902004	regulation of T cell activation	GO_BiologicalProcess-EBI-UniProt-GOA-ACAP-ARAP_25.05.2022_00h00	0.000159099	0.000355599	[4, 5, 6]	Group450	6.38298	[4	4
MAP2K4	GO:0030857	positive regulation of focal adhesion assembly	GO_BiologicalProcess-EBI-UniProt-GOA-ACAP-ARAP_25.05.2022_00h00	5.09613e-05	0.000140481	[4, 5, 6, 7]	Group579	16.9811	[4	4		SMARCA2	GO:0072657	regulation of Notch signaling pathway	GO_BiologicalProcess-EBI-UniProt-GOA-ACAP-ARAP_25.05.2022_00h00	0.000158951	0.000355686	[4, 5]	Group278	9.15493	[4	4
POLR2C	GO:0030857	positive regulation of transcription from RNA polymerase II promoter involved in cellular response to chemical stimulus	GO_BiologicalProcess-EBI-UniProt-GOA-ACAP-ARAP_25.05.2022_00h00	5.09613e-05	0.000140481	[4, 5, 6, 7]	Group576	16.9811	[4	4		ANP32E	GO:0032880	regulation of nuclease activity	GO_BiologicalProcess-EBI-UniProt-GOA-ACAP-ARAP_25.05.2022_00h00	0.000158951	0.000355686	[4, 5]	Group333	9.15493	[4	4
RAB40B	GO:0030857	regulation of histone H3-K9 methylation	GO_BiologicalProcess-EBI-UniProt-GOA-ACAP-ARAP_25.05.2022_00h00	5.09613e-05	0.000140481	[4, 5, 6, 7]	Group552	16.9811	[4	4		SLC7A5	GO:2001240	regulation of binding	GO_BiologicalProcess-EBI-UniProt-GOA-ACAP-ARAP_25.05.2022_00h00	0.000162536	0.000362435	[4, 5, 7, 8, 9]	Group527	36.3636	[4	4
PIP4K2C	GO:0030857	ventricular septum morphogenesis	GO_BiologicalProcess-EBI-UniProt-GOA-ACAP-ARAP_25.05.2022_00h00	5.09613e-05	0.000140481	[4, 5, 6, 7]	Group550	16.9811	[4	4		CTTN	GO:0021761	lamellipodium assembly	GO_BiologicalProcess-EBI-UniProt-GOA-ACAP-ARAP_25.05.2022_00h00	0.000166178	0.000370124	[4, 5, 6, 7]	Group446	8.64198	[4	4
SRCIN1	GO:0120034	chaperone-mediated autophagy	GO_BiologicalProcess-EBI-UniProt-GOA-ACAP-ARAP_25.05.2022_00h00	5.23632e-05	0.000143964	[4, 5, 6, 7, 8]	Group538	11.3821	[4	4		TCEAL9	GO:0010256	lamellipodium organization	GO_BiologicalProcess-EBI-UniProt-GOA-ACAP-ARAP_25.05.2022_00h00	0.000166178	0.000370124	[4, 5, 6, 7]	Group521	8.64198	[4	4
SOX9	GO:0120034	negative regulation of cell adhesion	GO_BiologicalProcess-EBI-UniProt-GOA-ACAP-ARAP_25.05.2022_00h00	5.23632e-05	0.000143964	[4, 5, 6, 7, 8]	Group397	11.3821	[4	4		SOX2	GO:0042325	regulation of carbohydrate metabolic process	GO_BiologicalProcess-EBI-UniProt-GOA-ACAP-ARAP_25.05.2022_00h00	0.000167319	0.000371798	[4, 5, 6, 7, 8, 9]	Group417	9.67742	[4	4
GBF1	GO:0120034	positive regulation of actin nucleation	GO_BiologicalProcess-EBI-UniProt-GOA-ACAP-ARAP_25.05.2022_00h00	5.23632e-05	0.000143964	[4, 5, 6, 7, 8]	Group584	11.3821	[4	4		PFDN1	GO:0006109	purine ribonucleotide metabolic process	GO_BiologicalProcess-EBI-UniProt-GOA-ACAP-ARAP_25.05.2022_00h00	0.000181454	0.000400415	[4, 5, 6]	Group527	7.84314	[4	4
TM9SF3	GO:0120034	positive regulation of extrinsic apoptotic signaling pathway via death domain receptors	GO_BiologicalProcess-EBI-UniProt-GOA-ACAP-ARAP_25.05.2022_00h00	5.23632e-05	0.000143964	[4, 5, 6, 7, 8]	Group586	11.3821	[4	4		DAAM2	GO:0008630	ribosome biogenesis	GO_BiologicalProcess-EBI-UniProt-GOA-ACAP-ARAP_25.05.2022_00h00	0.000181454	0.000400415	[4, 5, 6]	Group455	7.84314	[4	4
TCEA1	GO:0120034	regulation of extracellular matrix assembly	GO_BiologicalProcess-EBI-UniProt-GOA-ACAP-ARAP_25.05.2022_00h00	5.23632e-05	0.000143964	[4, 5, 6, 7, 8]	Group587	11.3821	[4	4		PICALM	GO:1903798	RNA localization	GO_BiologicalProcess-EBI-UniProt-GOA-ACAP-ARAP_25.05.2022_00h00	0.000181454	0.000400415	[4, 5, 6]	Group514	7.84314	[4	4
COPS3	GO:0045736	epithelial cell differentiation involved in prostate gland development	GO_BiologicalProcess-EBI-UniProt-GOA-ACAP-ARAP_25.05.2022_00h00	5.25701e-05	0.000144343	[4, 5, 6, 7, 8, 9, 10, 11, 12]	Group585	22.5806	[4	4		GPC1	GO:0010941	regulation of myelination	GO_BiologicalProcess-EBI-UniProt-GOA-ACAP-ARAP_25.05.2022_00h00	0.000197728	0.000432332	[4, 5, 6, 7]	Group483	10.1852	[4	4
EPRS	GO:0045736	regulation of transcription of nucleolar large rRNA by RNA polymerase I	GO_BiologicalProcess-EBI-UniProt-GOA-ACAP-ARAP_25.05.2022_00h00	5.25701e-05	0.000144343	[4, 5, 6, 7, 8, 9, 10, 11, 12]	Group403	22.5806	[4	4		SIRT2	GO:0051656	bone cell development	GO_BiologicalProcess-EBI-UniProt-GOA-ACAP-ARAP_25.05.2022_00h00	0.000226504	0.000486348	[4, 5, 6]	Group203	7.69231	[4	4
HIF1A	GO:0045736	regulation of vascular associated smooth muscle cell differentiation	GO_BiologicalProcess-EBI-UniProt-GOA-ACAP-ARAP_25.05.2022_00h00	5.25701e-05	0.000144343	[4, 5, 6, 7, 8, 9, 10, 11, 12]	Group587	22.5806	[4	4		PDIA3	GO:0043388	cellular metal ion homeostasis	GO_BiologicalProcess-EBI-UniProt-GOA-ACAP-ARAP_25.05.2022_00h00	0.000238492	0.000509796	[4, 6, 7, 8]	Group480	33.3333	[4	4
FUBP1	GO:0044843	organophosphate metabolic process	GO_BiologicalProcess-EBI-UniProt-GOA-ACAP-ARAP_25.05.2022_00h00	5.74104e-05	0.000155583	[4, 5]	Group585	8.39695	[4	4		ID4	GO:0030155	regulation of chromosome organization	GO_BiologicalProcess-EBI-UniProt-GOA-ACAP-ARAP_25.05.2022_00h00	0.000238492	0.000509796	[4, 6, 7, 8]	Group527	33.3333	[4	4
APC	GO:0044843	regulation of peptidyl-tyrosine phosphorylation	GO_BiologicalProcess-EBI-UniProt-GOA-ACAP-ARAP_25.05.2022_00h00	5.74104e-05	0.000155583	[4, 5]	Group587	8.39695	[4	4		RBM39	GO:0000082	amyloid-beta metabolic process	GO_BiologicalProcess-EBI-UniProt-GOA-ACAP-ARAP_25.05.2022_00h00	0.000245754	0.000524147	[4, 5, 6, 7, 8]	Group228	6.03248	[4	4
EFEMP1	GO:0030510	cell-cell adhesion mediated by cadherin	GO_BiologicalProcess-EBI-UniProt-GOA-ACAP-ARAP_25.05.2022_00h00	5.9097e-05	0.000158914	[4, 5, 6, 7, 8, 9]	Group574	11.9266	[4	4		SSNA1	GO:0048468	osteoblast differentiation	GO_BiologicalProcess-EBI-UniProt-GOA-ACAP-ARAP_25.05.2022_00h00	0.000245754	0.000524147	[4, 5, 6, 7, 8]	Group273	6.03248	[4	4
RBM42	GO:0030510	cellular response to UV	GO_BiologicalProcess-EBI-UniProt-GOA-ACAP-ARAP_25.05.2022_00h00	5.9097e-05	0.000158914	[4, 5, 6, 7, 8, 9]	Group583	11.9266	[4	4		SEC62	GO:0031344	pancreas development	GO_BiologicalProcess-EBI-UniProt-GOA-ACAP-ARAP_25.05.2022_00h00	0.000245754	0.000524147	[4, 5, 6, 7, 8]	Group369	6.03248	[4	4
PHGDH	GO:0046824	endothelial tube morphogenesis	GO_BiologicalProcess-EBI-UniProt-GOA-ACAP-ARAP_25.05.2022_00h00	6.21481e-05	0.000165834	[4, 5, 6, 7, 8]	Group238	14.9254	[4	4		GTF3C6	GO:0032869	stress fiber assembly	GO_BiologicalProcess-EBI-UniProt-GOA-ACAP-ARAP_25.05.2022_00h00	0.00410991	0.00640622	[4, 5, 6, 7]	Group414	7.9646	[4	4
KAT2B	GO:0046824	prostate gland growth	GO_BiologicalProcess-EBI-UniProt-GOA-ACAP-ARAP_25.05.2022_00h00	6.21481e-05	0.000165834	[4, 5, 6, 7, 8]	Group577	14.9254	[4	4		CAMK2G	GO:0051052	cellular response to prostaglandin E stimulus	GO_BiologicalProcess-EBI-UniProt-GOA-ACAP-ARAP_25.05.2022_00h00	0.00417829	0.00650222	[4, 5, 6]	Group455	12.8205	[4	4
APH1A	GO:0006631	histone methylation	GO_BiologicalProcess-EBI-UniProt-GOA-ACAP-ARAP_25.05.2022_00h00	7.23397e-05	0.00019083	[4, 5, 7]	Group523	7.14286	[4	4		TPD52L2	GO:1904996	neuron projection extension	GO_BiologicalProcess-EBI-UniProt-GOA-ACAP-ARAP_25.05.2022_00h00	0.00429279	0.00666411	[4, 5, 6, 7, 8, 9]	Group527	9.45946	[4	4
MIF	GO:0006631	mitotic cell cycle checkpoint signaling	GO_BiologicalProcess-EBI-UniProt-GOA-ACAP-ARAP_25.05.2022_00h00	7.23397e-05	0.00019083	[4, 5, 7]	Group580	7.14286	[4	4		SRSF4	GO:0006360	sprouting angiogenesis	GO_BiologicalProcess-EBI-UniProt-GOA-ACAP-ARAP_25.05.2022_00h00	0.00429279	0.00666411	[4, 5, 6, 7, 8, 9]	Group509	9.45946	[4	4
POLE3	GO:0006631	regulation of cell activation	GO_BiologicalProcess-EBI-UniProt-GOA-ACAP-ARAP_25.05.2022_00h00	7.23397e-05	0.00019083	[4, 5, 7]	Group154	7.14286	[4	4		PLXNB2	GO:0044255	regulation of autophagy	GO_BiologicalProcess-EBI-UniProt-GOA-ACAP-ARAP_25.05.2022_00h00	0.00434633	0.00674174	[4, 5, 6, 7, 8]	Group328	10.7143	[4	4
EIF3G	GO:0050882	cellular response to metal ion	GO_BiologicalProcess-EBI-UniProt-GOA-ACAP-ARAP_25.05.2022_00h00	7.24808e-05	0.000190961	[4, 6]	Group164	50	[4	4		AKAP12	GO:0032606	response to oxygen-containing compound	GO_BiologicalProcess-EBI-UniProt-GOA-ACAP-ARAP_25.05.2022_00h00	0.00434633	0.00674174	[4, 5, 6, 7, 8]	Group498	10.7143	[4	4
S100A11	GO:0031098	negative regulation of biomineral tissue development	GO_BiologicalProcess-EBI-UniProt-GOA-ACAP-ARAP_25.05.2022_00h00	7.23075e-05	0.000190987	[4, 5, 6]	Group587	8.07018	[4	4		BCL2L1	GO:0060341	macrophage proliferation	GO_BiologicalProcess-EBI-UniProt-GOA-ACAP-ARAP_25.05.2022_00h00	0.0045857	0.00707286	[4, 5, 6]	Group527	16	[4	4
SRPK2	GO:0031098	regulation of osteoblast proliferation	GO_BiologicalProcess-EBI-UniProt-GOA-ACAP-ARAP_25.05.2022_00h00	7.23075e-05	0.000190987	[4, 5, 6]	Group413	8.07018	[4	4		HNRNPH1	GO:1902903	muscle structure development	GO_BiologicalProcess-EBI-UniProt-GOA-ACAP-ARAP_25.05.2022_00h00	0.00462481	0.00712168	[4, 6, 7]	Group274	9.33333	[4	4
TMED2	GO:1902532	cellular carbohydrate metabolic process	GO_BiologicalProcess-EBI-UniProt-GOA-ACAP-ARAP_25.05.2022_00h00	7.71206e-05	0.000202163	[4, 5, 6, 7]	Group572	6.58135	[4	4		FASN	GO:0048584	regulation of multicellular organismal process	GO_BiologicalProcess-EBI-UniProt-GOA-ACAP-ARAP_25.05.2022_00h00	0.00462481	0.00712168	[4, 5, 6]	Group185	9.33333	[4	4
SERP1	GO:1902532	protein secretion	GO_BiologicalProcess-EBI-UniProt-GOA-ACAP-ARAP_25.05.2022_00h00	7.71206e-05	0.000202163	[4, 5, 6, 7]	Group551	6.58135	[4	4		ATP6V0A1	GO:1903047	regulation of muscle cell differentiation	GO_BiologicalProcess-EBI-UniProt-GOA-ACAP-ARAP_25.05.2022_00h00	0.00462481	0.00712168	[4, 6, 7]	Group491	9.33333	[4	4
CSE1L	GO:1902532	T cell activation involved in immune response	GO_BiologicalProcess-EBI-UniProt-GOA-ACAP-ARAP_25.05.2022_00h00	7.71206e-05	0.000202163	[4, 5, 6, 7]	Group167	6.58135	[4	4		FLOT2	GO:0034644	positive regulation of cytoplasmic translation	GO_BiologicalProcess-EBI-UniProt-GOA-ACAP-ARAP_25.05.2022_00h00	0.00474687	0.00728616	[4, 5]	Group239	10.5263	[4	4
EIF3J	GO:0034249	clathrin adaptor activity	GO_BiologicalProcess-EBI-UniProt-GOA-ACAP-ARAP_25.05.2022_00h00	8.66691e-05	0.000224371	[4, 5, 6]	Group571	8.8785	[4	4		RAB14	GO:2000106	positive regulation of developmental growth	GO_BiologicalProcess-EBI-UniProt-GOA-ACAP-ARAP_25.05.2022_00h00	0.00474687	0.00728616	[4, 5]	Group527	10.5263	[4	4
VPS51	GO:0034250	atrial septum morphogenesis	GO_BiologicalProcess-EBI-UniProt-GOA-ACAP-ARAP_25.05.2022_00h00	8.84674e-05	0.000228459	[4, 5, 6]	Group205	9.49721	[4	4		ARF4	GO:0070571	positive regulation of endothelial cell migration	GO_BiologicalProcess-EBI-UniProt-GOA-ACAP-ARAP_25.05.2022_00h00	0.00527282	0.00800983	[4, 5]	Group527	7.19424	[4	4
CKAP5	GO:0034250	somatic hypermutation of immunoglobulin genes	GO_BiologicalProcess-EBI-UniProt-GOA-ACAP-ARAP_25.05.2022_00h00	8.84674e-05	0.000228459	[4, 5, 6]	Group571	9.49721	[4	4		RGS5	GO:0010676	cellular response to nutrient levels	GO_BiologicalProcess-EBI-UniProt-GOA-ACAP-ARAP_25.05.2022_00h00	0.0055193	0.00831158	[4, 5, 6, 7]	Group289	6.30631	[4	4
GOLPH3	GO:0050679	phosphatidylinositol biosynthetic process	GO_BiologicalProcess-EBI-UniProt-GOA-ACAP-ARAP_25.05.2022_00h00	9.10886e-05	0.000234067	[4, 5, 6]	Group509	8.58369	[4	4		TPM4	GO:0006887	post-transcriptional gene silencing by RNA	GO_BiologicalProcess-EBI-UniProt-GOA-ACAP-ARAP_25.05.2022_00h00	0.0055193	0.00831158	[4, 5, 6]	Group358	6.30631	[4	4
TBCA	GO:0050679	positive regulation of leukocyte migration	GO_BiologicalProcess-EBI-UniProt-GOA-ACAP-ARAP_25.05.2022_00h00	9.10886e-05	0.000234067	[4, 5, 6]	Group587	8.58369	[4	4		EZR	GO:2000737	regulation of vesicle-mediated transport	GO_BiologicalProcess-EBI-UniProt-GOA-ACAP-ARAP_25.05.2022_00h00	0.00554251	0.00833995	[4, 5, 6, 8]	Group526	7.14286	[4	4
HNRNPL	GO:0050679	positive regulation of T cell activation	GO_BiologicalProcess-EBI-UniProt-GOA-ACAP-ARAP_25.05.2022_00h00	9.10886e-05	0.000234067	[4, 5, 6]	Group418	8.58369	[4	4		PAK1	GO:1905477	mitotic cell cycle process	GO_BiologicalProcess-EBI-UniProt-GOA-ACAP-ARAP_25.05.2022_00h00	0.00562842	0.0084559	[4, 5, 6, 7]	Group493	10.1695	[4	4
KIAA0368	GO:0006839	activin receptor signaling pathway	GO_BiologicalProcess-EBI-UniProt-GOA-ACAP-ARAP_25.05.2022_00h00	9.14914e-05	0.000234813	[4, 5]	Group577	9.13706	[4	4		SRSF11	GO:0110053	mitotic cytokinesis	GO_BiologicalProcess-EBI-UniProt-GOA-ACAP-ARAP_25.05.2022_00h00	0.00562842	0.0084559	[4, 5, 6, 7]	Group527	10.1695	[4	4
TMEM9B	GO:0006839	ER-nucleus signaling pathway	GO_BiologicalProcess-EBI-UniProt-GOA-ACAP-ARAP_25.05.2022_00h00	9.14914e-05	0.000234813	[4, 5]	Group518	9.13706	[4	4		DNAJB1	GO:0048584	negative regulation of gliogenesis	GO_BiologicalProcess-EBI-UniProt-GOA-ACAP-ARAP_25.05.2022_00h00	0.00562842	0.0084559	[4, 5, 6, 7]	Group253	10.1695	[4	4
PTGES2	GO:0006839	positive regulation of Notch signaling pathway	GO_BiologicalProcess-EBI-UniProt-GOA-ACAP-ARAP_25.05.2022_00h00	9.14914e-05	0.000234813	[4, 5]	Group513	9.13706	[4	4		SRSF6	GO:0061041	negative regulation of histone acetylation	GO_BiologicalProcess-EBI-UniProt-GOA-ACAP-ARAP_25.05.2022_00h00	0.00562842	0.0084559	[4, 5, 6, 7]	Group294	10.1695	[4	4
FDFT1	GO:0006839	regulation of T cell differentiation	GO_BiologicalProcess-EBI-UniProt-GOA-ACAP-ARAP_25.05.2022_00h00	9.14914e-05	0.000234813	[4, 5]	Group331	9.13706	[4	4		COPS6	GO:0051492	cardiac conduction	GO_BiologicalProcess-EBI-UniProt-GOA-ACAP-ARAP_25.05.2022_00h00	0.0057702	0.00863497	[4, 5, 6, 7]	Group273	11.9048	[4	4
GMFB	GO:0006839	response to ketone	GO_BiologicalProcess-EBI-UniProt-GOA-ACAP-ARAP_25.05.2022_00h00	9.14914e-05	0.000234813	[4, 5]	Group424	9.13706	[4	4		AP2S1	GO:0010629	negative regulation of DNA metabolic process	GO_BiologicalProcess-EBI-UniProt-GOA-ACAP-ARAP_25.05.2022_00h00	0.0057702	0.00863497	[4, 5, 6, 7]	Group154	11.9048	[4	4
WASL	GO:0042770	Golgi to endosome transport	GO_BiologicalProcess-EBI-UniProt-GOA-ACAP-ARAP_25.05.2022_00h00	0.000104135	0.00026401	[4, 5, 6]	Group492	9.04523	[4	4		CCDC124	GO:0033365	negative regulation of endoplasmic reticulum stress-induced intrinsic apoptotic signaling pathway	GO_BiologicalProcess-EBI-UniProt-GOA-ACAP-ARAP_25.05.2022_00h00	0.0057702	0.00863497	[4, 5, 6, 7]	Group190	11.9048	[4	4
CAMK1D	GO:0042770	long-chain fatty-acyl-CoA biosynthetic process	GO_BiologicalProcess-EBI-UniProt-GOA-ACAP-ARAP_25.05.2022_00h00	0.000104135	0.00026401	[4, 5, 6]	Group526	9.04523	[4	4		MCL1	GO:0060020	negative regulation of macromolecule biosynthetic process	GO_BiologicalProcess-EBI-UniProt-GOA-ACAP-ARAP_25.05.2022_00h00	0.00607151	0.00907166	[4, 5]	Group446	21.4286	[4	4
SLC9A3R2	GO:0042770	monosaccharide biosynthetic process	GO_BiologicalProcess-EBI-UniProt-GOA-ACAP-ARAP_25.05.2022_00h00	0.000104135	0.00026401	[4, 5, 6]	Group585	9.04523	[4	4		CDK9	GO:0043393	negative regulation of macromolecule metabolic process	GO_BiologicalProcess-EBI-UniProt-GOA-ACAP-ARAP_25.05.2022_00h00	0.00607151	0.00907166	[4, 5, 6, 7]	Group468	21.4286	[4	4
DEGS1	GO:0042770	regulation of type B pancreatic cell proliferation	GO_BiologicalProcess-EBI-UniProt-GOA-ACAP-ARAP_25.05.2022_00h00	0.000104135	0.00026401	[4, 5, 6]	Group561	9.04523	[4	4		RAB10	GO:0045595	nucleosome organization	GO_BiologicalProcess-EBI-UniProt-GOA-ACAP-ARAP_25.05.2022_00h00	0.00607151	0.00907166	[4, 5]	Group097	21.4286	[4	4
ALDH5A1	GO:0051216	carbohydrate transport	GO_BiologicalProcess-EBI-UniProt-GOA-ACAP-ARAP_25.05.2022_00h00	0.000104285	0.000264069	[4, 5, 6]	Group583	8.75576	[4	4		CTDNEP1	GO:1901019	oocyte development	GO_BiologicalProcess-EBI-UniProt-GOA-ACAP-ARAP_25.05.2022_00h00	0.00607151	0.00907166	[4, 5]	Group325	21.4286	[4	4
IFNGR1	GO:0051216	genitalia development	GO_BiologicalProcess-EBI-UniProt-GOA-ACAP-ARAP_25.05.2022_00h00	0.000104285	0.000264069	[4, 5, 6]	Group416	8.75576	[4	4		RASD1	GO:0051258	negative regulation of cell-matrix adhesion	GO_BiologicalProcess-EBI-UniProt-GOA-ACAP-ARAP_25.05.2022_00h00	0.00641705	0.00952834	[4, 5, 6, 7, 8]	Group083	7.43802	[4	4
JUNB	GO:1902105	neuroblast proliferation	GO_BiologicalProcess-EBI-UniProt-GOA-ACAP-ARAP_25.05.2022_00h00	0.000105922	0.000267564	[4, 5, 6, 7, 8, 9]	Group372	7.62195	[4	4		CHMP2A	GO:0002764	negative regulation of neural precursor cell proliferation	GO_BiologicalProcess-EBI-UniProt-GOA-ACAP-ARAP_25.05.2022_00h00	0.00658317	0.00975227	[4, 5, 6, 7, 8, 9]	Group112	8.75	[4	4
DBN1	GO:1902105	regulation of protein targeting	GO_BiologicalProcess-EBI-UniProt-GOA-ACAP-ARAP_25.05.2022_00h00	0.000105922	0.000267564	[4, 5, 6, 7, 8, 9]	Group582	7.62195	[4	4		TIAM1	GO:0010648	negative regulation of smooth muscle cell proliferation	GO_BiologicalProcess-EBI-UniProt-GOA-ACAP-ARAP_25.05.2022_00h00	0.00658317	0.00975227	[4, 5, 7, 8, 9]	Group513	8.75	[4	4
ECH1	GO:0050680	cell death in response to hydrogen peroxide	GO_BiologicalProcess-EBI-UniProt-GOA-ACAP-ARAP_25.05.2022_00h00	0.000109674	0.000276372	[4, 5, 6]	Group509	10.1351	[4	4		PSIP1	GO:0048813	cellular response to cadmium ion	GO_BiologicalProcess-EBI-UniProt-GOA-ACAP-ARAP_25.05.2022_00h00	0.0069483	0.0101905	[4, 6, 7, 8]	Group417	6.28272	[4	4
UBE2D3	GO:0050680	kidney epithelium development	GO_BiologicalProcess-EBI-UniProt-GOA-ACAP-ARAP_25.05.2022_00h00	0.000109674	0.000276372	[4, 5, 6]	Group319	10.1351	[4	4		ILF2	GO:0051897	miRNA metabolic process	GO_BiologicalProcess-EBI-UniProt-GOA-ACAP-ARAP_25.05.2022_00h00	0.00751815	0.0109173	[4, 5, 6]	Group214	8.53659	[4	4
CTNNA1	GO:0050680	lymphocyte apoptotic process	GO_BiologicalProcess-EBI-UniProt-GOA-ACAP-ARAP_25.05.2022_00h00	0.000109674	0.000276372	[4, 5, 6]	Group159	10.1351	[4	4		HACD3	GO:0030234	endosomal transport	GO_BiologicalProcess-EBI-UniProt-GOA-ACAP-ARAP_25.05.2022_00h00	0.00803927	0.0116123	[4, 5, 6]	Group513	6.28019	[4	4
CAB39	GO:0050680	positive regulation of NF-kappaB transcription factor activity	GO_BiologicalProcess-EBI-UniProt-GOA-ACAP-ARAP_25.05.2022_00h00	0.000109674	0.000276372	[4, 5, 6]	Group215	10.1351	[4	4		NCAM1	GO:0043523	anoikis	GO_BiologicalProcess-EBI-UniProt-GOA-ACAP-ARAP_25.05.2022_00h00	0.00891357	0.0127308	[4, 6, 7]	Group091	13.3333	[4	4
UQCRFS1	GO:0050680	vesicle tethering	GO_BiologicalProcess-EBI-UniProt-GOA-ACAP-ARAP_25.05.2022_00h00	0.000109674	0.000276372	[4, 5, 6]	Group587	10.1351	[4	4		GSTO1	GO:0071375	apoptotic process	GO_BiologicalProcess-EBI-UniProt-GOA-ACAP-ARAP_25.05.2022_00h00	0.00891357	0.0127308	[4, 6, 7]	Group172	13.3333	[4	4
SURF4	GO:0048661	endocardial cushion development	GO_BiologicalProcess-EBI-UniProt-GOA-ACAP-ARAP_25.05.2022_00h00	0.000114669	0.000287917	[4, 5, 6]	Group408	12.7907	[4	4		GRB2	GO:0007417	muscle adaptation	GO_BiologicalProcess-EBI-UniProt-GOA-ACAP-ARAP_25.05.2022_00h00	0.00891357	0.0127308	[4, 5, 6, 7]	Group520	13.3333	[4	4
MYO5A	GO:0048661	intrinsic apoptotic signaling pathway in response to DNA damage by p53 class mediator	GO_BiologicalProcess-EBI-UniProt-GOA-ACAP-ARAP_25.05.2022_00h00	0.000114669	0.000287917	[4, 5, 6]	Group178	12.7907	[4	4		MATR3	GO:0034763	positive regulation of stem cell population maintenance	GO_BiologicalProcess-EBI-UniProt-GOA-ACAP-ARAP_25.05.2022_00h00	0.00891357	0.0127308	[4, 5, 6, 7]	Group527	13.3333	[4	4
BTG2	GO:0000422	ATPase-coupled cation transmembrane transporter activity	GO_BiologicalProcess-EBI-UniProt-GOA-ACAP-ARAP_25.05.2022_00h00	0.000117059	0.000293209	[4, 5, 7]	Group460	11.8812	[4	4		ADAR	GO:0031346	myelin assembly	GO_BiologicalProcess-EBI-UniProt-GOA-ACAP-ARAP_25.05.2022_00h00	0.00896602	0.0127962	[4, 5, 6]	Group114	18.75	[4	4
RAB5A	GO:0000422	cerebral cortex cell migration	GO_BiologicalProcess-EBI-UniProt-GOA-ACAP-ARAP_25.05.2022_00h00	0.000117059	0.000293209	[4, 5, 7]	Group188	11.8812	[4	4		GOLGA7	GO:0050768	regulation of calcium ion transport	GO_BiologicalProcess-EBI-UniProt-GOA-ACAP-ARAP_25.05.2022_00h00	0.00911582	0.0129616	[4, 5, 6, 7, 8, 9, 10]	Group438	7.54717	[4	4
ZFP36	GO:0000422	DNA polymerase activity	GO_BiologicalProcess-EBI-UniProt-GOA-ACAP-ARAP_25.05.2022_00h00	0.000117059	0.000293209	[4, 5, 7]	Group518	11.8812	[4	4		ABHD12	GO:0032940	regulation of DNA binding	GO_BiologicalProcess-EBI-UniProt-GOA-ACAP-ARAP_25.05.2022_00h00	0.00916306	0.0129997	[4, 6]	Group444	4.11215	[4	4
UBA2	GO:0000422	microtubule polymerization or depolymerization	GO_BiologicalProcess-EBI-UniProt-GOA-ACAP-ARAP_25.05.2022_00h00	0.000117059	0.000293209	[4, 5, 7]	Group234	11.8812	[4	4		FMNL2	GO:0033554	regulation of DNA biosynthetic process	GO_BiologicalProcess-EBI-UniProt-GOA-ACAP-ARAP_25.05.2022_00h00	0.00916306	0.0129997	[4, 6]	Group527	4.11215	[4	4
TMEM167A	GO:0000422	positive regulation of protein secretion	GO_BiologicalProcess-EBI-UniProt-GOA-ACAP-ARAP_25.05.2022_00h00	0.000117059	0.000293209	[4, 5, 7]	Group572	11.8812	[4	4		SLC25A22	GO:0034614	ion channel regulator activity	GO_BiologicalProcess-EBI-UniProt-GOA-ACAP-ARAP_25.05.2022_00h00	0.00966287	0.0136379	[4, 5, 6, 7, 8]	Group239	9.09091	[4	4
UBQLN1	GO:0000422	regulation of pattern recognition receptor signaling pathway	GO_BiologicalProcess-EBI-UniProt-GOA-ACAP-ARAP_25.05.2022_00h00	0.000117059	0.000293209	[4, 5, 7]	Group513	11.8812	[4	4		HCN2	GO:2001242	ion transmembrane transporter activity	GO_BiologicalProcess-EBI-UniProt-GOA-ACAP-ARAP_25.05.2022_00h00	0.00966287	0.0136379	[4, 5, 6, 7, 8]	Group316	9.09091	[4	4
EIF3A	GO:0048813	cellular response to catecholamine stimulus	GO_BiologicalProcess-EBI-UniProt-GOA-ACAP-ARAP_25.05.2022_00h00	0.000127585	0.000317667	[4, 6, 7, 8, 9, 10, 11, 12]	Group587	10	[4	4		PTPRN2	GO:0051893	regulation of smooth muscle cell proliferation	GO_BiologicalProcess-EBI-UniProt-GOA-ACAP-ARAP_25.05.2022_00h00	0.00966287	0.0136379	[4, 5, 6, 7, 8]	Group527	9.09091	[4	4
EPAS1	GO:0048813	cellular response to osmotic stress	GO_BiologicalProcess-EBI-UniProt-GOA-ACAP-ARAP_25.05.2022_00h00	0.000127585	0.000317667	[4, 6, 7, 8, 9, 10, 11, 12]	Group443	10	[4	4		PNN	GO:0043069	hemopoiesis	GO_BiologicalProcess-EBI-UniProt-GOA-ACAP-ARAP_25.05.2022_00h00	0.00994478	0.0140048	[4, 5, 6, 7]	Group506	5.66802	[4	4
TUG1	GO:0048813	eye morphogenesis	GO_BiologicalProcess-EBI-UniProt-GOA-ACAP-ARAP_25.05.2022_00h00	0.000127585	0.000317667	[4, 6, 7, 8, 9, 10, 11, 12]	Group303	10	[4	4		SRI	GO:0010001	MAPK cascade	GO_BiologicalProcess-EBI-UniProt-GOA-ACAP-ARAP_25.05.2022_00h00	0.0101522	0.0142548	[4, 5, 6, 7, 8, 9, 10, 11, 12, 13, 14]	Group405	10.4167	[4	4
IFITM1	GO:0048813	negative regulation of leukocyte cell-cell adhesion	GO_BiologicalProcess-EBI-UniProt-GOA-ACAP-ARAP_25.05.2022_00h00	0.000127585	0.000317667	[4, 6, 7, 8, 9, 10, 11, 12]	Group522	10	[4	4		MFN2	GO:0040017	regulation of protein localization to plasma membrane	GO_BiologicalProcess-EBI-UniProt-GOA-ACAP-ARAP_25.05.2022_00h00	0.0101522	0.0142548	[4, 5, 6, 7, 8, 9, 10, 11, 12, 13, 14]	Group496	10.4167	[4	4
CHD4	GO:0032355	face development	GO_BiologicalProcess-EBI-UniProt-GOA-ACAP-ARAP_25.05.2022_00h00	0.000133297	0.000329919	[4, 5]	Group560	10.4478	[4	4		CLTC	GO:0051147	dendritic transport	GO_BiologicalProcess-EBI-UniProt-GOA-ACAP-ARAP_25.05.2022_00h00	0.0101488	0.0142605	[4, 5, 6, 7]	Group343	7.40741	[4	4
CIAO1	GO:0016197	mammary gland epithelial cell differentiation	GO_BiologicalProcess-EBI-UniProt-GOA-ACAP-ARAP_25.05.2022_00h00	0.000137723	0.000339261	[4, 5]	Group301	8.10811	[4	4		POLR2I	GO:0000165	astrocyte development	GO_BiologicalProcess-EBI-UniProt-GOA-ACAP-ARAP_25.05.2022_00h00	0.0103727	0.0145325	[4, 5, 6]	Group520	8.95522	[4	4
PHC2	GO:0016197	positive regulation of actin cytoskeleton reorganization	GO_BiologicalProcess-EBI-UniProt-GOA-ACAP-ARAP_25.05.2022_00h00	0.000137723	0.000339261	[4, 5]	Group427	8.10811	[4	4		L1CAM	GO:0043406	response to interferon-alpha	GO_BiologicalProcess-EBI-UniProt-GOA-ACAP-ARAP_25.05.2022_00h00	0.0103727	0.0145325	[4, 5, 6]	Group438	8.95522	[4	4
EIF3E	GO:0016197	response to tumor necrosis factor	GO_BiologicalProcess-EBI-UniProt-GOA-ACAP-ARAP_25.05.2022_00h00	0.000137723	0.000339261	[4, 5]	Group274	8.10811	[4	4		ATP6V1A	GO:0023057	DNA repair	GO_BiologicalProcess-EBI-UniProt-GOA-ACAP-ARAP_25.05.2022_00h00	0.0106672	0.0148795	[4, 5, 6]	Group431	17.6471	[4	4
RMND5A	GO:0045637	I-kappaB phosphorylation	GO_BiologicalProcess-EBI-UniProt-GOA-ACAP-ARAP_25.05.2022_00h00	0.000140726	0.000345841	[4, 5, 6, 7, 8, 9]	Group478	8.55856	[4	4		HNRNPU	GO:0050790	tube morphogenesis	GO_BiologicalProcess-EBI-UniProt-GOA-ACAP-ARAP_25.05.2022_00h00	0.0108252	0.0150669	[4, 5]	Group254	5.02645	[4	4
TUSC2	GO:0045637	negative regulation of calcium-mediated signaling	GO_BiologicalProcess-EBI-UniProt-GOA-ACAP-ARAP_25.05.2022_00h00	0.000140726	0.000345841	[4, 5, 6, 7, 8, 9]	Group387	8.55856	[4	4		ZFAND5	GO:0016477	negative regulation of intracellular signal transduction	GO_BiologicalProcess-EBI-UniProt-GOA-ACAP-ARAP_25.05.2022_00h00	0.0111188	0.015386	[4, 5, 6, 7]	Group211	8.82353	[4	4
S100A16	GO:0045637	negative regulation of transcription regulatory region DNA binding	GO_BiologicalProcess-EBI-UniProt-GOA-ACAP-ARAP_25.05.2022_00h00	0.000140726	0.000345841	[4, 5, 6, 7, 8, 9]	Group540	8.55856	[4	4		OAT	GO:0097306	lipid biosynthetic process	GO_BiologicalProcess-EBI-UniProt-GOA-ACAP-ARAP_25.05.2022_00h00	0.0115085	0.0158793	[4, 5]	Group512	4.0797	[4	4
NIPSNAP1	GO:0045637	regulation of cAMP-dependent protein kinase activity	GO_BiologicalProcess-EBI-UniProt-GOA-ACAP-ARAP_25.05.2022_00h00	0.000140726	0.000345841	[4, 5, 6, 7, 8, 9]	Group582	8.55856	[4	4		USF2	GO:0048661	protein polymerization	GO_BiologicalProcess-EBI-UniProt-GOA-ACAP-ARAP_25.05.2022_00h00	0.0115711	0.0159541	[4, 5]	Group363	7.86517	[4	4
LRP1	GO:0045637	regulation of vesicle size	GO_BiologicalProcess-EBI-UniProt-GOA-ACAP-ARAP_25.05.2022_00h00	0.000140726	0.000345841	[4, 5, 6, 7, 8, 9]	Group586	8.55856	[4	4		ATP6V1B2	GO:0007275	positive regulation of aspartic-type endopeptidase activity involved in amyloid precursor protein catabolic process	GO_BiologicalProcess-EBI-UniProt-GOA-ACAP-ARAP_25.05.2022_00h00	0.011598	0.0159797	[4, 5, 6, 7, 8, 9]	Group526	6.76692	[4	4
SPRY2	GO:0036475	regulation of leukocyte activation	GO_BiologicalProcess-EBI-UniProt-GOA-ACAP-ARAP_25.05.2022_00h00	0.000144729	0.000353593	[4, 6, 7]	Group391	19.4444	[4	4		SNCA	GO:0032943	positive regulation of programmed cell death	GO_BiologicalProcess-EBI-UniProt-GOA-ACAP-ARAP_25.05.2022_00h00	0.0124359	0.0170358	[4, 5, 6]	Group520	4.97512	[4	4
TOB2	GO:0036475	regulation of transcription regulatory region DNA binding	GO_BiologicalProcess-EBI-UniProt-GOA-ACAP-ARAP_25.05.2022_00h00	0.000144729	0.000353593	[4, 6, 7]	Group572	19.4444	[4	4		WASF3	GO:2000819	reactive oxygen species metabolic process	GO_BiologicalProcess-EBI-UniProt-GOA-ACAP-ARAP_25.05.2022_00h00	0.0124359	0.0170358	[4, 5, 6]	Group151	4.97512	[4	4
THOC7	GO:0034446	endonuclease activity	GO_BiologicalProcess-EBI-UniProt-GOA-ACAP-ARAP_25.05.2022_00h00	0.000146393	0.00035724	[4, 5, 6]	Group547	10.9244	[4	4		CAP1	GO:0051130	receptor-mediated endocytosis	GO_BiologicalProcess-EBI-UniProt-GOA-ACAP-ARAP_25.05.2022_00h00	0.0124359	0.0170358	[4, 5, 6]	Group345	4.97512	[4	4
SUPT5H	GO:0034446	mitophagy	GO_BiologicalProcess-EBI-UniProt-GOA-ACAP-ARAP_25.05.2022_00h00	0.000146393	0.00035724	[4, 5, 6]	Group556	10.9244	[4	4		CDKN1B	GO:0042325	regulation of actin filament-based process	GO_BiologicalProcess-EBI-UniProt-GOA-ACAP-ARAP_25.05.2022_00h00	0.0124359	0.0170358	[4, 5, 6]	Group442	4.97512	[4	4
S1PR1	GO:0034446	negative regulation of blood vessel endothelial cell migration	GO_BiologicalProcess-EBI-UniProt-GOA-ACAP-ARAP_25.05.2022_00h00	0.000146393	0.00035724	[4, 5, 6]	Group564	10.9244	[4	4		ANP32B	GO:0072595	positive regulation of proteolysis	GO_BiologicalProcess-EBI-UniProt-GOA-ACAP-ARAP_25.05.2022_00h00	0.0130242	0.01774	[4, 5]	Group286	9.80392	[4	4
BCL6	GO:0034446	negative regulation of Notch signaling pathway	GO_BiologicalProcess-EBI-UniProt-GOA-ACAP-ARAP_25.05.2022_00h00	0.000146393	0.00035724	[4, 5, 6]	Group584	10.9244	[4	4		IGFBP7	GO:0033554	cell development	GO_BiologicalProcess-EBI-UniProt-GOA-ACAP-ARAP_25.05.2022_00h00	0.0145935	0.0196395	[4, 5, 6]	Group406	15.7895	[4	4
CDC42BPB	GO:0034446	positive regulation of immune system process	GO_BiologicalProcess-EBI-UniProt-GOA-ACAP-ARAP_25.05.2022_00h00	0.000146393	0.00035724	[4, 5, 6]	Group361	10.9244	[4	4		CDC42	GO:0009966	cell fate determination	GO_BiologicalProcess-EBI-UniProt-GOA-ACAP-ARAP_25.05.2022_00h00	0.0145935	0.0196395	[4, 5, 6, 7, 8, 9, 10]	Group513	15.7895	[4	4
ASNS	GO:0034446	positive regulation of vascular associated smooth muscle cell proliferation	GO_BiologicalProcess-EBI-UniProt-GOA-ACAP-ARAP_25.05.2022_00h00	0.000146393	0.00035724	[4, 5, 6]	Group586	10.9244	[4	4		DRAP1	GO:0045860	cellular response to inorganic substance	GO_BiologicalProcess-EBI-UniProt-GOA-ACAP-ARAP_25.05.2022_00h00	0.0145935	0.0196395	[4, 5, 6]	Group149	15.7895	[4	4
CCT2	GO:0034645	negative regulation of ERK1 and ERK2 cascade	GO_BiologicalProcess-EBI-UniProt-GOA-ACAP-ARAP_25.05.2022_00h00	0.000155311	0.000376359	[4, 5]	Group571	5.3068	[4	4		HMGB1	GO:0060438	regulation of cell size	GO_BiologicalProcess-EBI-UniProt-GOA-ACAP-ARAP_25.05.2022_00h00	0.0145935	0.0196395	[4, 5, 6, 7, 8, 9, 10]	Group527	15.7895	[4	4
RAB5C	GO:0034645	negative regulation of organ growth	GO_BiologicalProcess-EBI-UniProt-GOA-ACAP-ARAP_25.05.2022_00h00	0.000155311	0.000376359	[4, 5]	Group322	5.3068	[4	4		DPP7	GO:0051279	positive regulation of protein localization to plasma membrane	GO_BiologicalProcess-EBI-UniProt-GOA-ACAP-ARAP_25.05.2022_00h00	0.0152166	0.0204637	[4, 6]	Group418	9.43396	[4	4
RTFDC1	GO:0034645	positive regulation of fat cell differentiation	GO_BiologicalProcess-EBI-UniProt-GOA-ACAP-ARAP_25.05.2022_00h00	0.000155311	0.000376359	[4, 5]	Group549	5.3068	[4	4		CSRP1	GO:0031328	positive regulation of ubiquitin-dependent protein catabolic process	GO_BiologicalProcess-EBI-UniProt-GOA-ACAP-ARAP_25.05.2022_00h00	0.0152166	0.0204637	[4, 5, 6, 7, 8, 9]	Group311	9.43396	[4	4
HMGA1	GO:0061640	positive regulation of cytokine production	GO_BiologicalProcess-EBI-UniProt-GOA-ACAP-ARAP_25.05.2022_00h00	0.000159349	0.000383912	[4, 5]	Group310	10.8333	[4	4		NFE2L1	GO:0060644	regulation of cell-matrix adhesion	GO_BiologicalProcess-EBI-UniProt-GOA-ACAP-ARAP_25.05.2022_00h00	0.0152166	0.0204637	[4, 5, 6]	Group099	9.43396	[4	4
UBE2H	GO:0061640	positive regulation of organelle assembly	GO_BiologicalProcess-EBI-UniProt-GOA-ACAP-ARAP_25.05.2022_00h00	0.000159349	0.000383912	[4, 5]	Group519	10.8333	[4	4		KIF5B	GO:0051222	regulation of cell-substrate adhesion	GO_BiologicalProcess-EBI-UniProt-GOA-ACAP-ARAP_25.05.2022_00h00	0.0152166	0.0204637	[4, 5, 6]	Group113	9.43396	[4	4
ATPAF1	GO:0090101	cellular response to glucose starvation	GO_BiologicalProcess-EBI-UniProt-GOA-ACAP-ARAP_25.05.2022_00h00	0.000159213	0.000384027	[4, 5, 6, 7, 8, 9]	Group583	9.80392	[4	4		CTNNB1	GO:0044319	regulation of cell-substrate junction organization	GO_BiologicalProcess-EBI-UniProt-GOA-ACAP-ARAP_25.05.2022_00h00	0.0152166	0.0204637	[4, 5, 6, 7, 8, 9]	Group123	9.43396	[4	4
PINK1	GO:0090101	mitotic sister chromatid segregation	GO_BiologicalProcess-EBI-UniProt-GOA-ACAP-ARAP_25.05.2022_00h00	0.000159213	0.000384027	[4, 5, 6, 7, 8, 9]	Group574	9.80392	[4	4		FABP3	GO:2000779	regulation of cellular amide metabolic process	GO_BiologicalProcess-EBI-UniProt-GOA-ACAP-ARAP_25.05.2022_00h00	0.0152166	0.0204637	[4, 6]	Group143	9.43396	[4	4
UBQLN2	GO:1902850	histone ubiquitination	GO_BiologicalProcess-EBI-UniProt-GOA-ACAP-ARAP_25.05.2022_00h00	0.000168152	0.000403719	[4, 5, 7]	Group351	9.35672	[4	4		SH3BGRL3	GO:0071702	ATP metabolic process	GO_BiologicalProcess-EBI-UniProt-GOA-ACAP-ARAP_25.05.2022_00h00	0.0166559	0.0222118	[4, 5, 6]	Group526	6.77966	[4	4
ALDH9A1	GO:1902850	positive regulation of oxidative stress-induced cell death	GO_BiologicalProcess-EBI-UniProt-GOA-ACAP-ARAP_25.05.2022_00h00	0.000168152	0.000403719	[4, 5, 7]	Group584	9.35672	[4	4		SRSF1	GO:0045595	cellular response to copper ion	GO_BiologicalProcess-EBI-UniProt-GOA-ACAP-ARAP_25.05.2022_00h00	0.0170083	0.0226343	[4, 5, 6, 7, 8, 9, 10]	Group212	7.29167	[4	4
TPM3	GO:1902850	regulation of sister chromatid cohesion	GO_BiologicalProcess-EBI-UniProt-GOA-ACAP-ARAP_25.05.2022_00h00	0.000168152	0.000403719	[4, 5, 7]	Group514	9.35672	[4	4		BCL2L2	GO:0019220	cellular response to cytokine stimulus	GO_BiologicalProcess-EBI-UniProt-GOA-ACAP-ARAP_25.05.2022_00h00	0.0170083	0.0226343	[4, 5, 6, 7, 8, 9, 10]	Group232	7.29167	[4	4
ATP6V1C1	GO:0031345	chemokine (C-X-C motif) ligand 2 production	GO_BiologicalProcess-EBI-UniProt-GOA-ACAP-ARAP_25.05.2022_00h00	0.000171417	0.000410612	[4, 5, 6]	Group443	8.69565	[4	4		MAPK3	GO:0043408	protein phosphatase activator activity	GO_BiologicalProcess-EBI-UniProt-GOA-ACAP-ARAP_25.05.2022_00h00	0.0170083	0.0226343	[4, 5, 6, 7, 8, 9, 10]	Group491	7.29167	[4	4
NOLC1	GO:0031345	positive regulation of mitochondrial fission	GO_BiologicalProcess-EBI-UniProt-GOA-ACAP-ARAP_25.05.2022_00h00	0.000171417	0.000410612	[4, 5, 6]	Group393	8.69565	[4	4		H1FX	GO:0002237	positive regulation of pinocytosis	GO_BiologicalProcess-EBI-UniProt-GOA-ACAP-ARAP_25.05.2022_00h00	0.0192325	0.025208	[4, 5, 6]	Group431	14.2857	[4	4
OXCT1	GO:0031345	regulation of oxidative phosphorylation	GO_BiologicalProcess-EBI-UniProt-GOA-ACAP-ARAP_25.05.2022_00h00	0.000171417	0.000410612	[4, 5, 6]	Group396	8.69565	[4	4		HSPD1	GO:0033002	glandular epithelial cell differentiation	GO_BiologicalProcess-EBI-UniProt-GOA-ACAP-ARAP_25.05.2022_00h00	0.0196101	0.0256326	[4, 5, 6, 7, 8, 9]	Group423	7.79221	[4	4
ATP6V1H	GO:0031345	response to retinoic acid	GO_BiologicalProcess-EBI-UniProt-GOA-ACAP-ARAP_25.05.2022_00h00	0.000171417	0.000410612	[4, 5, 6]	Group587	8.69565	[4	4		GNB2	GO:2000434	mRNA splice site selection	GO_BiologicalProcess-EBI-UniProt-GOA-ACAP-ARAP_25.05.2022_00h00	0.0196101	0.0256326	[4, 5, 6, 7, 8, 9]	Group477	7.79221	[4	4
SLAIN1	GO:0060251	negative regulation of NF-kappaB transcription factor activity	GO_BiologicalProcess-EBI-UniProt-GOA-ACAP-ARAP_25.05.2022_00h00	0.000173493	0.000414631	[4, 5, 7, 8, 9]	Group576	18.9189	[4	4		PSAT1	GO:0010556	lysosome localization	GO_BiologicalProcess-EBI-UniProt-GOA-ACAP-ARAP_25.05.2022_00h00	0.0202084	0.0263786	[4, 6]	Group480	10.5263	[4	4
MGLL	GO:0060251	response to osmotic stress	GO_BiologicalProcess-EBI-UniProt-GOA-ACAP-ARAP_25.05.2022_00h00	0.000173493	0.000414631	[4, 5, 7, 8, 9]	Group515	18.9189	[4	4		MTPN	GO:0006892	regulation of lipid metabolic process	GO_BiologicalProcess-EBI-UniProt-GOA-ACAP-ARAP_25.05.2022_00h00	0.0202084	0.0263786	[4, 6]	Group484	10.5263	[4	4
TECR	GO:0031334	ATP-dependent chromatin remodeler activity	GO_BiologicalProcess-EBI-UniProt-GOA-ACAP-ARAP_25.05.2022_00h00	0.000182054	0.000432612	[4, 5, 6, 7]	Group356	8.65385	[4	4		NPTN	GO:0042246	cytoplasmic sequestering of transcription factor	GO_BiologicalProcess-EBI-UniProt-GOA-ACAP-ARAP_25.05.2022_00h00	0.0208475	0.0271017	[4, 5, 6, 7, 8]	Group154	6.50407	[4	4
TOMM34	GO:0031334	regulation of polysaccharide biosynthetic process	GO_BiologicalProcess-EBI-UniProt-GOA-ACAP-ARAP_25.05.2022_00h00	0.000182054	0.000432612	[4, 5, 6, 7]	Group584	8.65385	[4	4		ARGLU1	GO:0007626	cytoskeleton-dependent intracellular transport	GO_BiologicalProcess-EBI-UniProt-GOA-ACAP-ARAP_25.05.2022_00h00	0.0208475	0.0271017	[4, 5, 6, 7, 8]	Group243	6.50407	[4	4
FOS	GO:0045931	positive regulation of cysteine-type endopeptidase activity	GO_BiologicalProcess-EBI-UniProt-GOA-ACAP-ARAP_25.05.2022_00h00	0.000188242	0.000444781	[4, 5, 6]	Group585	10.6557	[4	4		HNRNPA3	GO:0031032	long-chain fatty acid import across plasma membrane	GO_BiologicalProcess-EBI-UniProt-GOA-ACAP-ARAP_25.05.2022_00h00	0.0208475	0.0271017	[4, 5, 6, 7, 8]	Group450	6.50407	[4	4
MAPK1	GO:0042542	muscle cell development	GO_BiologicalProcess-EBI-UniProt-GOA-ACAP-ARAP_25.05.2022_00h00	0.000196717	0.000464278	[4, 5]	Group229	10.0719	[4	4		CNN3	GO:0031344	negative regulation of epithelial cell differentiation	GO_BiologicalProcess-EBI-UniProt-GOA-ACAP-ARAP_25.05.2022_00h00	0.0208475	0.0271017	[4, 5, 6, 7, 8]	Group461	6.50407	[4	4
PDXK	GO:0006915	positive regulation of cellular process	GO_BiologicalProcess-EBI-UniProt-GOA-ACAP-ARAP_25.05.2022_00h00	3.48338e-25	1.20989e-22	[4]	Group316	7.71878	[4]	4		MAT2A	GO:0010594	negative regulation of epithelial cell migration	GO_BiologicalProcess-EBI-UniProt-GOA-ACAP-ARAP_25.05.2022_00h00	0.0209232	0.0271816	[4, 5]	Group475	4.5283	[4	4
ACOT7	GO:0006915	response to organic substance	GO_BiologicalProcess-EBI-UniProt-GOA-ACAP-ARAP_25.05.2022_00h00	3.48338e-25	1.20989e-22	[4]	Group587	7.71878	[4]	4		ECHS1	GO:0098662	negative regulation of fat cell differentiation	GO_BiologicalProcess-EBI-UniProt-GOA-ACAP-ARAP_25.05.2022_00h00	0.0209232	0.0271816	[4, 5]	Group527	4.5283	[4	4
UBE2D2	GO:0006996	negative regulation of cell death	GO_BiologicalProcess-EBI-UniProt-GOA-ACAP-ARAP_25.05.2022_00h00	3.9904e-22	4.37684e-20	[4]	Group365	5.82151	[4]	4		LGALS1	GO:0050900	negative regulation of mRNA metabolic process	GO_BiologicalProcess-EBI-UniProt-GOA-ACAP-ARAP_25.05.2022_00h00	0.0210568	0.0273181	[4, 6, 7]	Group527	5.47945	[4	4
MRPL18	GO:0006996	system development	GO_BiologicalProcess-EBI-UniProt-GOA-ACAP-ARAP_25.05.2022_00h00	3.9904e-22	4.37684e-20	[4]	Group584	5.82151	[4]	4		PYGB	GO:0060284	cellular response to dsRNA	GO_BiologicalProcess-EBI-UniProt-GOA-ACAP-ARAP_25.05.2022_00h00	0.0218566	0.0282406	[4, 5, 7]	Group180	6.93069	[4	4
MRPS34	GO:0071310	multicellular organism development	GO_BiologicalProcess-EBI-UniProt-GOA-ACAP-ARAP_25.05.2022_00h00	1.46587e-21	1.27286e-19	[4]	Group578	6.77966	[4]	4		H3F3B	GO:0045022	cellular response to endogenous stimulus	GO_BiologicalProcess-EBI-UniProt-GOA-ACAP-ARAP_25.05.2022_00h00	0.0218566	0.0282406	[4, 5, 7]	Group255	6.93069	[4	4
HAX1	GO:0071310	positive regulation of protein metabolic process	GO_BiologicalProcess-EBI-UniProt-GOA-ACAP-ARAP_25.05.2022_00h00	1.46587e-21	1.27286e-19	[4]	Group587	6.77966	[4]	4		VDAC1	GO:0035194	positive regulation of organelle organization	GO_BiologicalProcess-EBI-UniProt-GOA-ACAP-ARAP_25.05.2022_00h00	0.0218566	0.0282406	[4, 5, 7]	Group113	6.93069	[4	4
CDC25B	GO:0071310	regulation of protein modification process	GO_BiologicalProcess-EBI-UniProt-GOA-ACAP-ARAP_25.05.2022_00h00	1.46587e-21	1.27286e-19	[4]	Group574	6.77966	[4]	4		CD63	GO:0051493	regulation of cell development	GO_BiologicalProcess-EBI-UniProt-GOA-ACAP-ARAP_25.05.2022_00h00	0.0218566	0.0282406	[4, 5, 7]	Group192	6.93069	[4	4
HIP1R	GO:0010243	intracellular protein transport	GO_BiologicalProcess-EBI-UniProt-GOA-ACAP-ARAP_25.05.2022_00h00	1.01506e-19	6.04395e-18	[4]	Group587	8.94834	[4]	4		ACADVL	GO:0120034	cellular response to external stimulus	GO_BiologicalProcess-EBI-UniProt-GOA-ACAP-ARAP_25.05.2022_00h00	0.0220404	0.0284397	[4, 7]	Group074	10.2564	[4	4
PDAP1	GO:0010243	regulation of intracellular signal transduction	GO_BiologicalProcess-EBI-UniProt-GOA-ACAP-ARAP_25.05.2022_00h00	1.01506e-19	6.04395e-18	[4]	Group578	8.94834	[4]	4		THY1	GO:0030217	glucose homeostasis	GO_BiologicalProcess-EBI-UniProt-GOA-ACAP-ARAP_25.05.2022_00h00	0.0221798	0.0286003	[4, 5, 6, 7]	Group526	5.42986	[4	4
ATXN10	GO:0071705	tube morphogenesis	GO_BiologicalProcess-EBI-UniProt-GOA-ACAP-ARAP_25.05.2022_00h00	6.43691e-18	2.79469e-16	[4]	Group577	6.79157	[4]	4		HSP90B1	GO:0032204	regulation of cell division	GO_BiologicalProcess-EBI-UniProt-GOA-ACAP-ARAP_25.05.2022_00h00	0.0221798	0.0286003	[4, 5, 6, 7]	Group482	5.42986	[4	4
QKI	GO:0051338	cellular nitrogen compound metabolic process	GO_BiologicalProcess-EBI-UniProt-GOA-ACAP-ARAP_25.05.2022_00h00	4.82995e-16	1.50233e-14	[4]	Group463	8.58018	[4]	4		DLG4	GO:0006396	regulation of glial cell differentiation	GO_BiologicalProcess-EBI-UniProt-GOA-ACAP-ARAP_25.05.2022_00h00	0.0232314	0.0298356	[4, 5, 6, 7, 8, 9]	Group380	8.47458	[4	4
FAM3C	GO:0051338	positive regulation of catalytic activity	GO_BiologicalProcess-EBI-UniProt-GOA-ACAP-ARAP_25.05.2022_00h00	4.82995e-16	1.50233e-14	[4]	Group587	8.58018	[4]	4		FLOT1	GO:0019829	synaptic transmission, GABAergic	GO_BiologicalProcess-EBI-UniProt-GOA-ACAP-ARAP_25.05.2022_00h00	0.0232314	0.0298356	[4, 5, 6, 7, 8, 9]	Group488	8.47458	[4	4
CLIC4	GO:1901701	protein phosphorylation	GO_BiologicalProcess-EBI-UniProt-GOA-ACAP-ARAP_25.05.2022_00h00	1.40775e-15	4.13203e-14	[4]	Group578	7.72262	[4]	4		ATP6V1E1	GO:0048167	positive regulation of nervous system development	GO_BiologicalProcess-EBI-UniProt-GOA-ACAP-ARAP_25.05.2022_00h00	0.025179	0.0320995	[4, 5]	Group192	5.58376	[4	4
WNK1	GO:1901701	regulation of cell differentiation	GO_BiologicalProcess-EBI-UniProt-GOA-ACAP-ARAP_25.05.2022_00h00	1.40775e-15	4.13203e-14	[4]	Group587	7.72262	[4]	4		MAPK8IP1	GO:1901653	positive regulation of neural precursor cell proliferation	GO_BiologicalProcess-EBI-UniProt-GOA-ACAP-ARAP_25.05.2022_00h00	0.025179	0.0320995	[4, 5]	Group441	5.58376	[4	4
UBXN1	GO:0010467	positive regulation of cellular biosynthetic process	GO_BiologicalProcess-EBI-UniProt-GOA-ACAP-ARAP_25.05.2022_00h00	1.29588e-14	2.81315e-13	[4]	Group587	4.77583	[4]	4		SRSF5	GO:0016570	activation of GTPase activity	GO_BiologicalProcess-EBI-UniProt-GOA-ACAP-ARAP_25.05.2022_00h00	0.0253716	0.0323018	[4, 5]	Group353	4.73684	[4	4
LAMP2	GO:0010467	regulation of protein serine/threonine kinase activity	GO_BiologicalProcess-EBI-UniProt-GOA-ACAP-ARAP_25.05.2022_00h00	1.29588e-14	2.81315e-13	[4]	Group477	4.77583	[4]	4		YWHAZ	GO:0030220	response to increased oxygen levels	GO_BiologicalProcess-EBI-UniProt-GOA-ACAP-ARAP_25.05.2022_00h00	0.0259273	0.0329435	[4, 5, 6, 7]	Group312	5.05415	[4	4
UGP2	GO:1901699	epithelial cell migration	GO_BiologicalProcess-EBI-UniProt-GOA-ACAP-ARAP_25.05.2022_00h00	1.28641e-14	2.82197e-13	[4]	Group578	9.21409	[4]	4		MALAT1	GO:0010800	response to ionizing radiation	GO_BiologicalProcess-EBI-UniProt-GOA-ACAP-ARAP_25.05.2022_00h00	0.0259273	0.0329435	[4, 5, 6, 7]	Group405	5.05415	[4	4
IDI1	GO:1901699	positive regulation of multicellular organismal process	GO_BiologicalProcess-EBI-UniProt-GOA-ACAP-ARAP_25.05.2022_00h00	1.28641e-14	2.82197e-13	[4]	Group587	9.21409	[4]	4		SPP1	GO:0043113	protein localization to organelle	GO_BiologicalProcess-EBI-UniProt-GOA-ACAP-ARAP_25.05.2022_00h00	0.0275435	0.034789	[4, 5, 6, 7, 8, 9, 10]	Group482	12.5	[4	4
RAD23B	GO:0071702	regulation of cell cycle	GO_BiologicalProcess-EBI-UniProt-GOA-ACAP-ARAP_25.05.2022_00h00	1.48897e-14	3.13436e-13	[4]	Group577	6.01852	[4]	4		GNB1	GO:0019222	regulation of lipase activity	GO_BiologicalProcess-EBI-UniProt-GOA-ACAP-ARAP_25.05.2022_00h00	0.0275435	0.034789	[4, 5, 6, 7, 8, 9, 10]	Group333	12.5	[4	4
SOX2	GO:0022607	organic substance catabolic process	GO_BiologicalProcess-EBI-UniProt-GOA-ACAP-ARAP_25.05.2022_00h00	2.28659e-14	4.49552e-13	[4]	Group584	5.62212	[4]	4		GJA1	GO:0030030	mammary gland epithelial cell proliferation	GO_BiologicalProcess-EBI-UniProt-GOA-ACAP-ARAP_25.05.2022_00h00	0.0277999	0.0350664	[4, 5, 6, 7]	Group383	5.91716	[4	4
BNIP3	GO:0022607	peptidyl-serine modification	GO_BiologicalProcess-EBI-UniProt-GOA-ACAP-ARAP_25.05.2022_00h00	2.28659e-14	4.49552e-13	[4]	Group365	5.62212	[4]	4		DDX5	GO:0000956	regulation of hormone levels	GO_BiologicalProcess-EBI-UniProt-GOA-ACAP-ARAP_25.05.2022_00h00	0.0298571	0.037341	[4, 5]	Group429	5.78035	[4	4
PICALM	GO:0022607	post-transcriptional regulation of gene expression	GO_BiologicalProcess-EBI-UniProt-GOA-ACAP-ARAP_25.05.2022_00h00	2.28659e-14	4.49552e-13	[4]	Group227	5.62212	[4]	4		NDUFA4	GO:0007169	glycolytic process	GO_BiologicalProcess-EBI-UniProt-GOA-ACAP-ARAP_25.05.2022_00h00	0.0316748	0.0393567	[4, 6, 7, 8, 9, 10]	Group520	7.8125	[4	4
RAB2A	GO:0044271	cellular response to growth factor stimulus	GO_BiologicalProcess-EBI-UniProt-GOA-ACAP-ARAP_25.05.2022_00h00	4.32971e-14	7.71206e-13	[4]	Group477	4.99403	[4]	4		PRDX2	GO:0072659	RNA-templated DNA biosynthetic process	GO_BiologicalProcess-EBI-UniProt-GOA-ACAP-ARAP_25.05.2022_00h00	0.0322606	0.0400064	[4, 5, 6]	Group433	5.07812	[4	4
GPC1	GO:0044271	signal transduction	GO_BiologicalProcess-EBI-UniProt-GOA-ACAP-ARAP_25.05.2022_00h00	4.32971e-14	7.71206e-13	[4]	Group587	4.99403	[4]	4		RHOA	GO:0010604	positive regulation of cell adhesion	GO_BiologicalProcess-EBI-UniProt-GOA-ACAP-ARAP_25.05.2022_00h00	0.0328486	0.040604	[4, 5, 6]	Group253	6.36364	[4	4
PDIA3	GO:0043085	cellular response to organic cyclic compound	GO_BiologicalProcess-EBI-UniProt-GOA-ACAP-ARAP_25.05.2022_00h00	5.53816e-13	8.36343e-12	[4]	Group548	7.2093	[4]	4		PKM	GO:0014070	regulation of stress-activated MAPK cascade	GO_BiologicalProcess-EBI-UniProt-GOA-ACAP-ARAP_25.05.2022_00h00	0.0328486	0.040604	[4, 5, 6]	Group527	6.36364	[4	4
HADHB	GO:0043085	immune system development	GO_BiologicalProcess-EBI-UniProt-GOA-ACAP-ARAP_25.05.2022_00h00	5.53816e-13	8.36343e-12	[4]	Group587	7.2093	[4]	4		HNRNPA1	GO:1903050	histone H3 acetylation	GO_BiologicalProcess-EBI-UniProt-GOA-ACAP-ARAP_25.05.2022_00h00	0.0339834	0.0418443	[4, 5, 6]	Group354	11.5385	[4	4
MAP3K10	GO:0009057	epithelial cell proliferation	GO_BiologicalProcess-EBI-UniProt-GOA-ACAP-ARAP_25.05.2022_00h00	6.24354e-13	9.22804e-12	[4]	Group322	6.97674	[4]	4		TUBB2A	GO:0032233	negative regulation of translation	GO_BiologicalProcess-EBI-UniProt-GOA-ACAP-ARAP_25.05.2022_00h00	0.0339834	0.0418443	[4, 5, 6]	Group230	11.5385	[4	4
VAMP3	GO:0009057	negative regulation of signal transduction	GO_BiologicalProcess-EBI-UniProt-GOA-ACAP-ARAP_25.05.2022_00h00	6.24354e-13	9.22804e-12	[4]	Group581	6.97674	[4]	4		ALDH2	GO:0044087	neuron development	GO_BiologicalProcess-EBI-UniProt-GOA-ACAP-ARAP_25.05.2022_00h00	0.0339834	0.0418443	[4, 5, 6]	Group216	11.5385	[4	4
JUN	GO:0043412	cellular response to hormone stimulus	GO_BiologicalProcess-EBI-UniProt-GOA-ACAP-ARAP_25.05.2022_00h00	8.93843e-13	1.27587e-11	[4]	Group587	5.1656	[4]	4		EDF1	GO:0002009	Golgi inheritance	GO_BiologicalProcess-EBI-UniProt-GOA-ACAP-ARAP_25.05.2022_00h00	0.0351249	0.0431386	[4, 5]	Group149	8.88889	[4	4
PRDX3	GO:0030030	protein polymerization	GO_BiologicalProcess-EBI-UniProt-GOA-ACAP-ARAP_25.05.2022_00h00	1.46676e-08	8.80901e-08	[4]	Group584	5.86475	[4]	4		RHOB	GO:0033143	regulation of synapse organization	GO_BiologicalProcess-EBI-UniProt-GOA-ACAP-ARAP_25.05.2022_00h00	0.0351249	0.0431386	[4, 5]	Group406	8.88889	[4	4
SLC6A8	GO:0030030	regulation of biomineral tissue development	GO_BiologicalProcess-EBI-UniProt-GOA-ACAP-ARAP_25.05.2022_00h00	1.46676e-08	8.80901e-08	[4]	Group587	5.86475	[4]	4		PTMA	GO:0097193	lipopolysaccharide-mediated signaling pathway	GO_BiologicalProcess-EBI-UniProt-GOA-ACAP-ARAP_25.05.2022_00h00	0.035183	0.0431822	[4, 5]	Group238	4.63215	[4	4
GATM	GO:0034097	regulation of developmental growth	GO_BiologicalProcess-EBI-UniProt-GOA-ACAP-ARAP_25.05.2022_00h00	1.83299e-08	1.06405e-07	[4]	Group578	6.86378	[4]	4		NCS1	GO:0006376	G protein-coupled receptor signaling pathway involved in heart process	GO_BiologicalProcess-EBI-UniProt-GOA-ACAP-ARAP_25.05.2022_00h00	0.0360342	0.0441136	[4, 5, 7]	Group191	5.49451	[4	4
METTL7A	GO:0034097	regulation of synaptic plasticity	GO_BiologicalProcess-EBI-UniProt-GOA-ACAP-ARAP_25.05.2022_00h00	1.83299e-08	1.06405e-07	[4]	Group587	6.86378	[4]	4		PPIA	GO:0010720	protein kinase regulator activity	GO_BiologicalProcess-EBI-UniProt-GOA-ACAP-ARAP_25.05.2022_00h00	0.0366129	0.0447648	[4, 5, 6, 7, 8, 9]	Group503	6.74157	[4	4
KHSRP	GO:0016192	canonical Wnt signaling pathway	GO_BiologicalProcess-EBI-UniProt-GOA-ACAP-ARAP_25.05.2022_00h00	5.97128e-08	3.19081e-07	[4]	Group577	5.70276	[4]	4		SPARC	GO:0006259	cell surface receptor signaling pathway	GO_BiologicalProcess-EBI-UniProt-GOA-ACAP-ARAP_25.05.2022_00h00	0.0372867	0.0455011	[4, 5, 6, 7]	Group404	5.26316	[4	4
MXI1	GO:0016192	neuron death in response to oxidative stress	GO_BiologicalProcess-EBI-UniProt-GOA-ACAP-ARAP_25.05.2022_00h00	5.97128e-08	3.19081e-07	[4]	Group244	5.70276	[4]	4		GAP43	GO:0010165	Golgi localization	GO_BiologicalProcess-EBI-UniProt-GOA-ACAP-ARAP_25.05.2022_00h00	0.0372867	0.0455011	[4, 5, 6, 7]	Group406	5.26316	[4	4
FSCN1	GO:0016192	substrate adhesion-dependent cell spreading	GO_BiologicalProcess-EBI-UniProt-GOA-ACAP-ARAP_25.05.2022_00h00	5.97128e-08	3.19081e-07	[4]	Group533	5.70276	[4]	4		YWHAQ	GO:0051147	maintenance of protein location in cell	GO_BiologicalProcess-EBI-UniProt-GOA-ACAP-ARAP_25.05.2022_00h00	0.0375529	0.0457676	[4, 5, 6, 7, 8, 9, 10]	Group527	7.46269	[4	4
RAB14	GO:0016192	tube formation	GO_BiologicalProcess-EBI-UniProt-GOA-ACAP-ARAP_25.05.2022_00h00	5.97128e-08	3.19081e-07	[4]	Group427	5.70276	[4]	4		MRFAP1	GO:1901987	neuron intrinsic apoptotic signaling pathway in response to oxidative stress	GO_BiologicalProcess-EBI-UniProt-GOA-ACAP-ARAP_25.05.2022_00h00	0.0375529	0.0457676	[4, 5, 6, 7, 8, 9, 10]	Group493	7.46269	[4	4
RHEB	GO:0034976	microtubule cytoskeleton organization involved in mitosis	GO_BiologicalProcess-EBI-UniProt-GOA-ACAP-ARAP_25.05.2022_00h00	6.14243e-08	3.25721e-07	[4]	Group373	10.5263	[4]	4		LDHB	GO:0008154	neuron projection morphogenesis	GO_BiologicalProcess-EBI-UniProt-GOA-ACAP-ARAP_25.05.2022_00h00	0.0375529	0.0457676	[4, 5, 6, 7, 8, 9, 10]	Group523	7.46269	[4	4
CDK5RAP3	GO:0034976	regulation of mRNA metabolic process	GO_BiologicalProcess-EBI-UniProt-GOA-ACAP-ARAP_25.05.2022_00h00	6.14243e-08	3.25721e-07	[4]	Group306	10.5263	[4]	4		CALM2	GO:0002040	regulation of epithelial cell migration	GO_BiologicalProcess-EBI-UniProt-GOA-ACAP-ARAP_25.05.2022_00h00	0.0387403	0.0469155	[4, 5]	Group418	6.14035	[4	4
EZR	GO:0060537	gastrulation	GO_BiologicalProcess-EBI-UniProt-GOA-ACAP-ARAP_25.05.2022_00h00	8.0634e-08	4.15944e-07	[4]	Group587	8.68545	[4]	4		APP	GO:0040012	cytokinesis	GO_BiologicalProcess-EBI-UniProt-GOA-ACAP-ARAP_25.05.2022_00h00	0.0394824	0.0477537	[4, 5, 6]	Group193	5.37634	[4	4
PKIA	GO:0060537	positive regulation of mitotic cell cycle	GO_BiologicalProcess-EBI-UniProt-GOA-ACAP-ARAP_25.05.2022_00h00	8.0634e-08	4.15944e-07	[4]	Group420	8.68545	[4]	4		CALM1	GO:0035196	cytoplasmic sequestering of NF-kappaB	GO_BiologicalProcess-EBI-UniProt-GOA-ACAP-ARAP_25.05.2022_00h00	0.0394824	0.0477537	[4, 5, 6]	Group256	5.37634	[4	4
SKI	GO:0060537	regulation of endothelial cell proliferation	GO_BiologicalProcess-EBI-UniProt-GOA-ACAP-ARAP_25.05.2022_00h00	8.0634e-08	4.15944e-07	[4]	Group307	8.68545	[4]	4		CALM3	GO:0042325	myeloid cell differentiation	GO_BiologicalProcess-EBI-UniProt-GOA-ACAP-ARAP_25.05.2022_00h00	0.0396509	0.0478969	[4, 5, 7, 8, 9]	Group471	7.35294	[4	4
NTRK2	GO:0060537	response to hydrogen peroxide	GO_BiologicalProcess-EBI-UniProt-GOA-ACAP-ARAP_25.05.2022_00h00	8.0634e-08	4.15944e-07	[4]	Group486	8.68545	[4]	4		ACTG1	GO:1900542	myeloid cell homeostasis	GO_BiologicalProcess-EBI-UniProt-GOA-ACAP-ARAP_25.05.2022_00h00	0.0396509	0.0478969	[4, 5, 7, 8, 9]	Group514	7.35294	[4	4
MAP2K1	GO:0060537	response to mechanical stimulus	GO_BiologicalProcess-EBI-UniProt-GOA-ACAP-ARAP_25.05.2022_00h00	8.0634e-08	4.15944e-07	[4]	Group389	8.68545	[4]	4		TMSB4X	GO:0030239	calcium ion transmembrane transporter activity	GO_BiologicalProcess-EBI-UniProt-GOA-ACAP-ARAP_25.05.2022_00h00	0.0411318	0.049498	[4, 5, 6, 7, 8, 9, 10]	Group347	10.7143	[4	4
VBP1	GO:0043086	mitotic cytokinesis	GO_BiologicalProcess-EBI-UniProt-GOA-ACAP-ARAP_25.05.2022_00h00	8.9384e-08	4.57681e-07	[4]	Group548	6.90476	[4]	4		ACTB	GO:0032873	regulation of metallopeptidase activity	GO_BiologicalProcess-EBI-UniProt-GOA-ACAP-ARAP_25.05.2022_00h00	0.0411318	0.049498	[4, 5, 6, 7, 8, 9, 10, 11, 12, 13]	Group036	10.7143	[4	4
TSPAN3	GO:0043086	phosphatidylinositol-mediated signaling	GO_BiologicalProcess-EBI-UniProt-GOA-ACAP-ARAP_25.05.2022_00h00	8.9384e-08	4.57681e-07	[4]	Group423	6.90476	[4]	4		GAPDH	GO:0050793	actin polymerization or depolymerization	GO_BiologicalProcess-EBI-UniProt-GOA-ACAP-ARAP_25.05.2022_00h00	2.82056e-22	3.85007e-20	[4]	Group145	6.07016	[4]	4
DNAJB1	GO:0043086	protein autophosphorylation	GO_BiologicalProcess-EBI-UniProt-GOA-ACAP-ARAP_25.05.2022_00h00	8.9384e-08	4.57681e-07	[4]	Group585	6.90476	[4]	4			GO:0032535	cellular response to carbohydrate stimulus	GO_BiologicalProcess-EBI-UniProt-GOA-ACAP-ARAP_25.05.2022_00h00	2.82056e-22	3.85007e-20	[4]	Group525	6.07016	[4]	4
SDCBP	GO:0043086	regulation of plasma membrane bounded cell projection assembly	GO_BiologicalProcess-EBI-UniProt-GOA-ACAP-ARAP_25.05.2022_00h00	8.9384e-08	4.57681e-07	[4]	Group587	6.90476	[4]	4			GO:0051239	regulation of DNA repair	GO_BiologicalProcess-EBI-UniProt-GOA-ACAP-ARAP_25.05.2022_00h00	3.67783e-22	4.68556e-20	[4]	Group520	6.0162	[4]	4
MCL1	GO:0035088	response to fatty acid	GO_BiologicalProcess-EBI-UniProt-GOA-ACAP-ARAP_25.05.2022_00h00	1.9929e-05	6.08973e-05	[4]	Group483	16.9492	[4]	4			GO:1902806	nucleosome disassembly	GO_BiologicalProcess-EBI-UniProt-GOA-ACAP-ARAP_25.05.2022_00h00	4.67287e-20	3.43456e-18	[4]	Group516	4.97955	[4]	4
SPIN1	GO:0031667	protein catabolic process in the vacuole	GO_BiologicalProcess-EBI-UniProt-GOA-ACAP-ARAP_25.05.2022_00h00	2.33156e-05	6.93149e-05	[4]	Group412	6.99029	[4]	4			GO:0006469	regulation of microtubule cytoskeleton organization	GO_BiologicalProcess-EBI-UniProt-GOA-ACAP-ARAP_25.05.2022_00h00	4.67287e-20	3.43456e-18	[4]	Group459	4.97955	[4]	4
PSIP1	GO:0009416	DNA catabolic process, endonucleolytic	GO_BiologicalProcess-EBI-UniProt-GOA-ACAP-ARAP_25.05.2022_00h00	2.37377e-05	7.04692e-05	[4]	Group506	7.93201	[4]	4			GO:0051347	regulation of nucleotide-excision repair	GO_BiologicalProcess-EBI-UniProt-GOA-ACAP-ARAP_25.05.2022_00h00	4.67287e-20	3.43456e-18	[4]	Group395	4.97955	[4]	4
HACD3	GO:0009416	negative regulation of cellular senescence	GO_BiologicalProcess-EBI-UniProt-GOA-ACAP-ARAP_25.05.2022_00h00	2.37377e-05	7.04692e-05	[4]	Group526	7.93201	[4]	4			GO:0009893	negative regulation of supramolecular fiber organization	GO_BiologicalProcess-EBI-UniProt-GOA-ACAP-ARAP_25.05.2022_00h00	4.53292e-19	2.54777e-17	[4]	Group386	6.24385	[4]	4
DDRGK1	GO:0050890	leukocyte migration	GO_BiologicalProcess-EBI-UniProt-GOA-ACAP-ARAP_25.05.2022_00h00	3.6838e-05	0.000105165	[4]	Group506	7.87172	[4]	4			GO:0048583	negative regulation of apoptotic signaling pathway	GO_BiologicalProcess-EBI-UniProt-GOA-ACAP-ARAP_25.05.2022_00h00	6.94381e-18	2.60189e-16	[4]	Group523	9.07859	[4]	4
GRB2	GO:0000302	lens development in camera-type eye	GO_BiologicalProcess-EBI-UniProt-GOA-ACAP-ARAP_25.05.2022_00h00	4.07974e-05	0.00011505	[4]	Group560	9.09091	[4]	4			GO:0033554	developmental cell growth	GO_BiologicalProcess-EBI-UniProt-GOA-ACAP-ARAP_25.05.2022_00h00	8.32855e-17	2.34057e-15	[4]	Group523	7.0922	[4]	4
MATR3	GO:0009743	positive regulation of neuron projection development	GO_BiologicalProcess-EBI-UniProt-GOA-ACAP-ARAP_25.05.2022_00h00	4.63848e-05	0.000129232	[4]	Group273	8.75	[4]	4			GO:0009888	positive regulation of mitotic cell cycle	GO_BiologicalProcess-EBI-UniProt-GOA-ACAP-ARAP_25.05.2022_00h00	2.07545e-15	4.66609e-14	[4]	Group525	6.82171	[4]	4
RAN	GO:0061024	long-chain fatty acid import into cell	GO_BiologicalProcess-EBI-UniProt-GOA-ACAP-ARAP_25.05.2022_00h00	6.54459e-05	0.000174188	[4]	Group212	5.76923	[4]	4			GO:0048678	regulation of neuron death	GO_BiologicalProcess-EBI-UniProt-GOA-ACAP-ARAP_25.05.2022_00h00	6.91503e-13	9.64571e-12	[4]	Group516	4.79263	[4]	4
FMNL2	GO:0061024	response to corticosterone	GO_BiologicalProcess-EBI-UniProt-GOA-ACAP-ARAP_25.05.2022_00h00	6.54459e-05	0.000174188	[4]	Group274	5.76923	[4]	4			GO:0014909	negative regulation of biological process	GO_BiologicalProcess-EBI-UniProt-GOA-ACAP-ARAP_25.05.2022_00h00	2.84586e-08	1.49407e-07	[4]	Group395	4.91464	[4]	4
ARPC3	GO:0007517	positive regulation of protein kinase B signaling	GO_BiologicalProcess-EBI-UniProt-GOA-ACAP-ARAP_25.05.2022_00h00	7.09514e-05	0.000187882	[4]	Group307	7.47922	[4]	4			GO:0018205	developmental process involved in reproduction	GO_BiologicalProcess-EBI-UniProt-GOA-ACAP-ARAP_25.05.2022_00h00	8.65404e-08	4.15524e-07	[4]	Group488	7.98005	[4]	4
NUCB1	GO:0007517	regulation of signal transduction by p53 class mediator	GO_BiologicalProcess-EBI-UniProt-GOA-ACAP-ARAP_25.05.2022_00h00	7.09514e-05	0.000187882	[4]	Group420	7.47922	[4]	4			GO:0018107	G2/M transition of mitotic cell cycle	GO_BiologicalProcess-EBI-UniProt-GOA-ACAP-ARAP_25.05.2022_00h00	1.09108e-07	5.08551e-07	[4]	Group312	7.74648	[4]	4
CLTC	GO:0030234	negative regulation of response to endoplasmic reticulum stress	GO_BiologicalProcess-EBI-UniProt-GOA-ACAP-ARAP_25.05.2022_00h00	7.73349e-05	0.00020247	[4]	Group423	5.24399	[4]	4			GO:0010975	intrinsic apoptotic signaling pathway	GO_BiologicalProcess-EBI-UniProt-GOA-ACAP-ARAP_25.05.2022_00h00	1.19741e-07	5.46121e-07	[4]	Group516	8.03109	[4]	4
NARS	GO:0030234	neuron maturation	GO_BiologicalProcess-EBI-UniProt-GOA-ACAP-ARAP_25.05.2022_00h00	7.73349e-05	0.00020247	[4]	Group279	5.24399	[4]	4			GO:0050790	protein acylation	GO_BiologicalProcess-EBI-UniProt-GOA-ACAP-ARAP_25.05.2022_00h00	1.31044e-07	5.94833e-07	[4]	Group071	9.91379	[4]	4
RING1	GO:0030234	regulation of actin cytoskeleton reorganization	GO_BiologicalProcess-EBI-UniProt-GOA-ACAP-ARAP_25.05.2022_00h00	7.73349e-05	0.00020247	[4]	Group149	5.24399	[4]	4			GO:0061640	gamete generation	GO_BiologicalProcess-EBI-UniProt-GOA-ACAP-ARAP_25.05.2022_00h00	3.82526e-07	1.58227e-06	[4]	Group520	5.58824	[4]	4
GOLM1	GO:0030234	regulation of secretion	GO_BiologicalProcess-EBI-UniProt-GOA-ACAP-ARAP_25.05.2022_00h00	7.73349e-05	0.00020247	[4]	Group587	5.24399	[4]	4			GO:0007346	calcium ion transport	GO_BiologicalProcess-EBI-UniProt-GOA-ACAP-ARAP_25.05.2022_00h00	5.01082e-07	2.00748e-06	[4]	Group308	10.2564	[4]	4
HIPK2	GO:0007160	mitotic intra-S DNA damage checkpoint signaling	GO_BiologicalProcess-EBI-UniProt-GOA-ACAP-ARAP_25.05.2022_00h00	8.36074e-05	0.000217254	[4]	Group584	8.4	[4]	4			GO:0060322	negative regulation of release of cytochrome c from mitochondria	GO_BiologicalProcess-EBI-UniProt-GOA-ACAP-ARAP_25.05.2022_00h00	6.31839e-07	2.47935e-06	[4]	Group523	6.0686	[4]	4
EPHX1	GO:0007160	reticulophagy	GO_BiologicalProcess-EBI-UniProt-GOA-ACAP-ARAP_25.05.2022_00h00	8.36074e-05	0.000217254	[4]	Group394	8.4	[4]	4			GO:0097193	response to extracellular stimulus	GO_BiologicalProcess-EBI-UniProt-GOA-ACAP-ARAP_25.05.2022_00h00	9.01599e-07	3.41179e-06	[4]	Group140	5.15223	[4]	4
ADD3	GO:0046903	positive regulation of transmembrane receptor protein serine/threonine kinase signaling pathway	GO_BiologicalProcess-EBI-UniProt-GOA-ACAP-ARAP_25.05.2022_00h00	9.00223e-05	0.000231899	[4]	Group342	5.58824	[4]	4			GO:0051130	dendrite morphogenesis	GO_BiologicalProcess-EBI-UniProt-GOA-ACAP-ARAP_25.05.2022_00h00	9.58539e-07	3.59876e-06	[4]	Group449	5.66239	[4]	4
FKBP3	GO:0046903	regulation of synapse organization	GO_BiologicalProcess-EBI-UniProt-GOA-ACAP-ARAP_25.05.2022_00h00	9.00223e-05	0.000231899	[4]	Group473	5.58824	[4]	4			GO:0001525	positive regulation of cell morphogenesis involved in differentiation	GO_BiologicalProcess-EBI-UniProt-GOA-ACAP-ARAP_25.05.2022_00h00	9.58539e-07	3.59876e-06	[4]	Group433	5.66239	[4]	4
TXNIP	GO:0090162	positive regulation of production of molecular mediator of immune response	GO_BiologicalProcess-EBI-UniProt-GOA-ACAP-ARAP_25.05.2022_00h00	0.000173493	0.000414631	[4]	Group483	18.9189	[4]	4			GO:0002009	regulation of heart rate	GO_BiologicalProcess-EBI-UniProt-GOA-ACAP-ARAP_25.05.2022_00h00	9.58539e-07	3.59876e-06	[4]	Group144	5.66239	[4]	4
HDGF	GO:0048863	hematopoietic stem cell differentiation	GO_BiologicalProcess-EBI-UniProt-GOA-ACAP-ARAP_25.05.2022_00h00	0.000179578	0.000427215	[4]	Group504	7.95455	[4]	4			GO:0016310	regulation of catabolic process	GO_BiologicalProcess-EBI-UniProt-GOA-ACAP-ARAP_25.05.2022_00h00	4.06715e-06	1.31958e-05	[4]	Group127	6.16883	[4]	4
PBXIP1	GO:0048863	phosphatidylglycerol metabolic process	GO_BiologicalProcess-EBI-UniProt-GOA-ACAP-ARAP_25.05.2022_00h00	0.000179578	0.000427215	[4]	Group120	7.95455	[4]	4			GO:0043408	positive regulation of peptide hormone secretion	GO_BiologicalProcess-EBI-UniProt-GOA-ACAP-ARAP_25.05.2022_00h00	6.14761e-06	1.92592e-05	[4]	Group491	7.36544	[4]	4
HSPA1B	GO:0042981	negative regulation of biological process	GO_BiologicalProcess-EBI-UniProt-GOA-ACAP-ARAP_25.05.2022_00h00	6.71961e-23	1.07721e-20	[5, 6]	Group587	8.24742	[5	5			GO:0006810	transmembrane receptor protein tyrosine kinase activity	GO_BiologicalProcess-EBI-UniProt-GOA-ACAP-ARAP_25.05.2022_00h00	6.6874e-06	2.07462e-05	[4]	Group308	9.00474	[4]	4
MAP1LC3B	GO:0042981	negative regulation of programmed cell death	GO_BiologicalProcess-EBI-UniProt-GOA-ACAP-ARAP_25.05.2022_00h00	6.71961e-23	1.07721e-20	[5, 6]	Group316	8.24742	[5	5			GO:1901652	anatomical structure formation involved in morphogenesis	GO_BiologicalProcess-EBI-UniProt-GOA-ACAP-ARAP_25.05.2022_00h00	7.13182e-06	2.19114e-05	[4]	Group355	7	[4]	4
LPAR1	GO:0043066	regulation of nitrogen compound metabolic process	GO_BiologicalProcess-EBI-UniProt-GOA-ACAP-ARAP_25.05.2022_00h00	2.35528e-21	1.96336e-19	[5, 6, 7]	Group587	9.71787	[5	5			GO:0014706	synaptic vesicle transport	GO_BiologicalProcess-EBI-UniProt-GOA-ACAP-ARAP_25.05.2022_00h00	7.13182e-06	2.19114e-05	[4]	Group469	7	[4]	4
ARL8B	GO:0031399	regulation of cell communication	GO_BiologicalProcess-EBI-UniProt-GOA-ACAP-ARAP_25.05.2022_00h00	1.09764e-19	6.35413e-18	[5, 6]	Group510	7.646	[5	5			GO:0032507	regulation of cellular biosynthetic process	GO_BiologicalProcess-EBI-UniProt-GOA-ACAP-ARAP_25.05.2022_00h00	1.13459e-05	3.33571e-05	[4]	Group434	5.05872	[4]	4
PTP4A2	GO:0031399	regulation of developmental process	GO_BiologicalProcess-EBI-UniProt-GOA-ACAP-ARAP_25.05.2022_00h00	1.09764e-19	6.35413e-18	[5, 6]	Group464	7.646	[5	5			GO:0010035	rRNA transcription	GO_BiologicalProcess-EBI-UniProt-GOA-ACAP-ARAP_25.05.2022_00h00	1.13459e-05	3.33571e-05	[4]	Group422	5.05872	[4]	4
DHCR24	GO:0031399	regulation of transferase activity	GO_BiologicalProcess-EBI-UniProt-GOA-ACAP-ARAP_25.05.2022_00h00	1.09764e-19	6.35413e-18	[5, 6]	Group587	7.646	[5	5			GO:0051128	positive regulation of DNA metabolic process	GO_BiologicalProcess-EBI-UniProt-GOA-ACAP-ARAP_25.05.2022_00h00	1.71633e-05	4.8305e-05	[4]	Group273	7.27273	[4]	4
CDKN1B	GO:0019220	negative regulation of protein metabolic process	GO_BiologicalProcess-EBI-UniProt-GOA-ACAP-ARAP_25.05.2022_00h00	1.64114e-15	4.75019e-14	[5, 6]	Group574	7.28123	[5	5			GO:0045184	regulation of lyase activity	GO_BiologicalProcess-EBI-UniProt-GOA-ACAP-ARAP_25.05.2022_00h00	1.71633e-05	4.8305e-05	[4]	Group369	7.27273	[4]	4
CDKN2D	GO:0019220	positive regulation of macromolecule biosynthetic process	GO_BiologicalProcess-EBI-UniProt-GOA-ACAP-ARAP_25.05.2022_00h00	1.64114e-15	4.75019e-14	[5, 6]	Group463	7.28123	[5	5			GO:0033045	negative regulation of extrinsic apoptotic signaling pathway in absence of ligand	GO_BiologicalProcess-EBI-UniProt-GOA-ACAP-ARAP_25.05.2022_00h00	2.98679e-05	7.99405e-05	[4]	Group523	5.14403	[4]	4
GIT1	GO:0019220	regulation of protein localization	GO_BiologicalProcess-EBI-UniProt-GOA-ACAP-ARAP_25.05.2022_00h00	1.64114e-15	4.75019e-14	[5, 6]	Group587	7.28123	[5	5			GO:2001020	positive regulation of glycogen biosynthetic process	GO_BiologicalProcess-EBI-UniProt-GOA-ACAP-ARAP_25.05.2022_00h00	2.98679e-05	7.99405e-05	[4]	Group254	5.14403	[4]	4
INPP5F	GO:0031401	positive regulation of RNA metabolic process	GO_BiologicalProcess-EBI-UniProt-GOA-ACAP-ARAP_25.05.2022_00h00	6.54279e-15	1.62323e-13	[5, 6, 7]	Group587	8.0292	[5	5			GO:0042592	regulation of early endosome to late endosome transport	GO_BiologicalProcess-EBI-UniProt-GOA-ACAP-ARAP_25.05.2022_00h00	4.22041e-05	0.000108989	[4]	Group210	8.18182	[4]	4
CDC42	GO:0043549	MAPK cascade	GO_BiologicalProcess-EBI-UniProt-GOA-ACAP-ARAP_25.05.2022_00h00	8.84283e-15	2.11821e-13	[5, 7, 8]	Group587	8.79905	[5	5			GO:0043484	negative regulation of biosynthetic process	GO_BiologicalProcess-EBI-UniProt-GOA-ACAP-ARAP_25.05.2022_00h00	5.48822e-05	0.000138	[4]	Group500	10.1562	[4]	4
DRAP1	GO:0043549	regulation of cellular amide metabolic process	GO_BiologicalProcess-EBI-UniProt-GOA-ACAP-ARAP_25.05.2022_00h00	8.84283e-15	2.11821e-13	[5, 7, 8]	Group463	8.79905	[5	5			GO:0035239	regulation of glucose transmembrane transport	GO_BiologicalProcess-EBI-UniProt-GOA-ACAP-ARAP_25.05.2022_00h00	5.48822e-05	0.000138	[4]	Group299	10.1562	[4]	4
HMGB1	GO:0043523	positive regulation of RNA biosynthetic process	GO_BiologicalProcess-EBI-UniProt-GOA-ACAP-ARAP_25.05.2022_00h00	2.24945e-14	4.46462e-13	[5, 6, 7]	Group587	15.4185	[5	5			GO:0062197	regulation of viral life cycle	GO_BiologicalProcess-EBI-UniProt-GOA-ACAP-ARAP_25.05.2022_00h00	5.48822e-05	0.000138	[4]	Group308	10.1562	[4]	4
SRSF2	GO:0051493	angiogenesis	GO_BiologicalProcess-EBI-UniProt-GOA-ACAP-ARAP_25.05.2022_00h00	2.37537e-14	4.62642e-13	[5, 6]	Group584	10.1222	[5	5			GO:0080135	response to prostaglandin	GO_BiologicalProcess-EBI-UniProt-GOA-ACAP-ARAP_25.05.2022_00h00	5.48822e-05	0.000138	[4]	Group527	10.1562	[4]	4
DPP7	GO:0061136	regulation of BMP signaling pathway	GO_BiologicalProcess-EBI-UniProt-GOA-ACAP-ARAP_25.05.2022_00h00	1.56413e-08	9.33994e-08	[5, 6, 7, 8]	Group581	12.2549	[5	5			GO:0048872	fatty acid beta-oxidation	GO_BiologicalProcess-EBI-UniProt-GOA-ACAP-ARAP_25.05.2022_00h00	8.51426e-05	0.00020313	[4]	Group327	7.27273	[4]	4
EIF4B	GO:0032774	regulation of protein localization to cell surface	GO_BiologicalProcess-EBI-UniProt-GOA-ACAP-ARAP_25.05.2022_00h00	1.64112e-08	9.71619e-08	[5, 6, 7]	Group587	4.83957	[5	5			GO:0035195	lipid kinase activity	GO_BiologicalProcess-EBI-UniProt-GOA-ACAP-ARAP_25.05.2022_00h00	9.4607e-05	0.000224589	[4]	Group251	8.67052	[4]	4
PRKAR1A	GO:0031400	muscle organ development	GO_BiologicalProcess-EBI-UniProt-GOA-ACAP-ARAP_25.05.2022_00h00	1.70905e-08	1.00612e-07	[5, 6, 7]	Group587	8.31758	[5	5			GO:0000302	lung development	GO_BiologicalProcess-EBI-UniProt-GOA-ACAP-ARAP_25.05.2022_00h00	0.000109248	0.000255535	[4]	Group488	6.6482	[4]	4
CTNNB1	GO:0031400	positive regulation of protein import into nucleus	GO_BiologicalProcess-EBI-UniProt-GOA-ACAP-ARAP_25.05.2022_00h00	1.70905e-08	1.00612e-07	[5, 6, 7]	Group585	8.31758	[5	5			GO:0043408	filopodium assembly	GO_BiologicalProcess-EBI-UniProt-GOA-ACAP-ARAP_25.05.2022_00h00	0.000120648	0.000278451	[4]	Group526	6.20525	[4]	4
SERINC3	GO:0007169	glial cell proliferation	GO_BiologicalProcess-EBI-UniProt-GOA-ACAP-ARAP_25.05.2022_00h00	3.30705e-08	1.86267e-07	[5, 6, 7]	Group574	7.64526	[5	5			GO:0016192	cortical cytoskeleton organization	GO_BiologicalProcess-EBI-UniProt-GOA-ACAP-ARAP_25.05.2022_00h00	0.000129338	0.000295298	[4]	Group520	7.5	[4]	4
BCL2L2	GO:0007169	mitochondrial transport	GO_BiologicalProcess-EBI-UniProt-GOA-ACAP-ARAP_25.05.2022_00h00	3.30705e-08	1.86267e-07	[5, 6, 7]	Group557	7.64526	[5	5			GO:0007268	negative regulation of neuron apoptotic process	GO_BiologicalProcess-EBI-UniProt-GOA-ACAP-ARAP_25.05.2022_00h00	0.000134039	0.000305303	[4]	Group525	5.11905	[4]	4
CD81	GO:0007169	response to glucose	GO_BiologicalProcess-EBI-UniProt-GOA-ACAP-ARAP_25.05.2022_00h00	3.30705e-08	1.86267e-07	[5, 6, 7]	Group414	7.64526	[5	5			GO:0006109	purine-containing compound metabolic process	GO_BiologicalProcess-EBI-UniProt-GOA-ACAP-ARAP_25.05.2022_00h00	0.000185324	0.000408012	[4]	Group312	6.6879	[4]	4
CUTA	GO:0007169	small molecule biosynthetic process	GO_BiologicalProcess-EBI-UniProt-GOA-ACAP-ARAP_25.05.2022_00h00	3.30705e-08	1.86267e-07	[5, 6, 7]	Group587	7.64526	[5	5			GO:0150116	pyruvate metabolic process	GO_BiologicalProcess-EBI-UniProt-GOA-ACAP-ARAP_25.05.2022_00h00	0.000185324	0.000408012	[4]	Group368	6.6879	[4]	4
VIM	GO:0120035	astrocyte development	GO_BiologicalProcess-EBI-UniProt-GOA-ACAP-ARAP_25.05.2022_00h00	3.85808e-08	2.14406e-07	[5, 6]	Group393	7.41259	[5	5			GO:0016242	Rac protein signal transduction	GO_BiologicalProcess-EBI-UniProt-GOA-ACAP-ARAP_25.05.2022_00h00	0.000185324	0.000408012	[4]	Group405	6.6879	[4]	4
CDC37	GO:0120035	autophagy of mitochondrion	GO_BiologicalProcess-EBI-UniProt-GOA-ACAP-ARAP_25.05.2022_00h00	3.85808e-08	2.14406e-07	[5, 6]	Group584	7.41259	[5	5			GO:0051128	oligodendrocyte differentiation	GO_BiologicalProcess-EBI-UniProt-GOA-ACAP-ARAP_25.05.2022_00h00	0.000220615	0.000475841	[4]	Group525	4.44283	[4]	4
ACTR2	GO:0120035	maternal placenta development	GO_BiologicalProcess-EBI-UniProt-GOA-ACAP-ARAP_25.05.2022_00h00	3.85808e-08	2.14406e-07	[5, 6]	Group587	7.41259	[5	5			GO:0002520	regulation of mitotic cell cycle phase transition	GO_BiologicalProcess-EBI-UniProt-GOA-ACAP-ARAP_25.05.2022_00h00	0.000220615	0.000475841	[4]	Group508	4.44283	[4]	4
EIF3I	GO:0120035	positive regulation of smooth muscle cell proliferation	GO_BiologicalProcess-EBI-UniProt-GOA-ACAP-ARAP_25.05.2022_00h00	3.85808e-08	2.14406e-07	[5, 6]	Group538	7.41259	[5	5			GO:0051094	regulation of oxidative stress-induced neuron death	GO_BiologicalProcess-EBI-UniProt-GOA-ACAP-ARAP_25.05.2022_00h00	0.000220615	0.000475841	[4]	Group284	4.44283	[4]	4
FAM96B	GO:0120035	regulation of cell-matrix adhesion	GO_BiologicalProcess-EBI-UniProt-GOA-ACAP-ARAP_25.05.2022_00h00	3.85808e-08	2.14406e-07	[5, 6]	Group396	7.41259	[5	5			GO:0050806	cell projection organization	GO_BiologicalProcess-EBI-UniProt-GOA-ACAP-ARAP_25.05.2022_00h00	0.00447614	0.00692063	[4]	Group355	6.12245	[4]	4
CLTA	GO:2000112	dendrite morphogenesis	GO_BiologicalProcess-EBI-UniProt-GOA-ACAP-ARAP_25.05.2022_00h00	4.18811e-08	2.309e-07	[5, 6]	Group571	8.00712	[5	5			GO:0008306	regulation of cytokinesis	GO_BiologicalProcess-EBI-UniProt-GOA-ACAP-ARAP_25.05.2022_00h00	0.00447614	0.00692063	[4]	Group443	6.12245	[4]	4
SET	GO:2000112	negative regulation of cell size	GO_BiologicalProcess-EBI-UniProt-GOA-ACAP-ARAP_25.05.2022_00h00	4.18811e-08	2.309e-07	[5, 6]	Group549	8.00712	[5	5			GO:0051128	regulation of defense response	GO_BiologicalProcess-EBI-UniProt-GOA-ACAP-ARAP_25.05.2022_00h00	0.00447614	0.00692063	[4]	Group464	6.12245	[4]	4
SPTBN1	GO:0043043	endosomal transport	GO_BiologicalProcess-EBI-UniProt-GOA-ACAP-ARAP_25.05.2022_00h00	5.54202e-08	3.0077e-07	[5, 6]	Group549	7.24638	[5	5			GO:0042110	establishment of protein localization to organelle	GO_BiologicalProcess-EBI-UniProt-GOA-ACAP-ARAP_25.05.2022_00h00	0.00534651	0.00810244	[4]	Group184	9.09091	[4]	4
MARCKS	GO:0043043	positive regulation of cell cycle process	GO_BiologicalProcess-EBI-UniProt-GOA-ACAP-ARAP_25.05.2022_00h00	5.54202e-08	3.0077e-07	[5, 6]	Group571	7.24638	[5	5			GO:0016311	cardiac muscle cell action potential	GO_BiologicalProcess-EBI-UniProt-GOA-ACAP-ARAP_25.05.2022_00h00	0.00607151	0.00907166	[4]	Group007	21.4286	[4]	4
PKD1	GO:0051017	regulation of protein localization to membrane	GO_BiologicalProcess-EBI-UniProt-GOA-ACAP-ARAP_25.05.2022_00h00	5.83704e-08	3.13515e-07	[5, 6, 7, 9]	Group573	12.7168	[5	5			GO:0035914	cellular response to starvation	GO_BiologicalProcess-EBI-UniProt-GOA-ACAP-ARAP_25.05.2022_00h00	0.00638432	0.00949451	[4]	Group363	11.6279	[4]	4
LDOC1	GO:0051017	retrograde transport, endosome to Golgi	GO_BiologicalProcess-EBI-UniProt-GOA-ACAP-ARAP_25.05.2022_00h00	5.83704e-08	3.13515e-07	[5, 6, 7, 9]	Group584	12.7168	[5	5			GO:1901215	monocarboxylic acid catabolic process	GO_BiologicalProcess-EBI-UniProt-GOA-ACAP-ARAP_25.05.2022_00h00	0.00694535	0.010194	[4]	Group472	4.03877	[4]	4
PSAT1	GO:0045862	mitotic spindle organization	GO_BiologicalProcess-EBI-UniProt-GOA-ACAP-ARAP_25.05.2022_00h00	9.2659e-08	4.73288e-07	[5, 6, 7]	Group548	8.92857	[5	5			GO:0090162	establishment of localization in cell	GO_BiologicalProcess-EBI-UniProt-GOA-ACAP-ARAP_25.05.2022_00h00	0.00891357	0.0127308	[4]	Group068	13.3333	[4]	4
ARL6IP5	GO:0045862	transcription coactivator activity	GO_BiologicalProcess-EBI-UniProt-GOA-ACAP-ARAP_25.05.2022_00h00	9.2659e-08	4.73288e-07	[5, 6, 7]	Group581	8.92857	[5	5			GO:0051336	transmembrane receptor protein tyrosine kinase adaptor activity	GO_BiologicalProcess-EBI-UniProt-GOA-ACAP-ARAP_25.05.2022_00h00	0.0108087	0.015055	[4]	Group099	5.6	[4]	4
ARGLU1	GO:0043410	positive regulation of ERK1 and ERK2 cascade	GO_BiologicalProcess-EBI-UniProt-GOA-ACAP-ARAP_25.05.2022_00h00	9.29917e-08	4.73826e-07	[5, 6, 7, 8]	Group557	8.13953	[5	5			GO:0010565	protein targeting to mitochondrion	GO_BiologicalProcess-EBI-UniProt-GOA-ACAP-ARAP_25.05.2022_00h00	0.0115711	0.0159541	[4]	Group424	7.86517	[4]	4
HNRNPA3	GO:0043410	regulation of gliogenesis	GO_BiologicalProcess-EBI-UniProt-GOA-ACAP-ARAP_25.05.2022_00h00	9.29917e-08	4.73826e-07	[5, 6, 7, 8]	Group587	8.13953	[5	5			GO:0044087	establishment of vesicle localization	GO_BiologicalProcess-EBI-UniProt-GOA-ACAP-ARAP_25.05.2022_00h00	0.030437	0.037942	[4]	Group326	5.74713	[4]	4
CNN3	GO:0001732	myelin assembly	GO_BiologicalProcess-EBI-UniProt-GOA-ACAP-ARAP_25.05.2022_00h00	1.11026e-05	3.6323e-05	[5, 6, 7, 8, 9, 10]	Group549	35.2941	[5	5			GO:0042060	exocytosis	GO_BiologicalProcess-EBI-UniProt-GOA-ACAP-ARAP_25.05.2022_00h00	0.030437	0.037942	[4]	Group475	5.74713	[4]	4
MAT2A	GO:0007179	negative regulation of cell cycle G1/S phase transition	GO_BiologicalProcess-EBI-UniProt-GOA-ACAP-ARAP_25.05.2022_00h00	1.26312e-05	4.03734e-05	[5, 6, 7, 8]	Group583	9.54545	[5	5			GO:0010763	protein localization to cell cortex	GO_BiologicalProcess-EBI-UniProt-GOA-ACAP-ARAP_25.05.2022_00h00	0.0321518	0.0398975	[4]	Group527	4.73538	[4]	4
RAB6A	GO:0007179	positive regulation of stem cell proliferation	GO_BiologicalProcess-EBI-UniProt-GOA-ACAP-ARAP_25.05.2022_00h00	1.26312e-05	4.03734e-05	[5, 6, 7, 8]	Group370	9.54545	[5	5			GO:0007091	cell communication by electrical coupling	GO_BiologicalProcess-EBI-UniProt-GOA-ACAP-ARAP_25.05.2022_00h00	0.03385	0.0417069	[4]	Group024	5.92593	[4]	4
LUC7L3	GO:0007179	sister chromatid cohesion	GO_BiologicalProcess-EBI-UniProt-GOA-ACAP-ARAP_25.05.2022_00h00	1.26312e-05	4.03734e-05	[5, 6, 7, 8]	Group574	9.54545	[5	5			GO:0014065	cellular response to light stimulus	GO_BiologicalProcess-EBI-UniProt-GOA-ACAP-ARAP_25.05.2022_00h00	0.0366129	0.0447648	[4]	Group527	6.74157	[4]	4
RPL39	GO:0060428	double-strand break repair	GO_BiologicalProcess-EBI-UniProt-GOA-ACAP-ARAP_25.05.2022_00h00	1.28758e-05	4.10293e-05	[5, 6, 7]	Group550	20	[5	5			GO:0030036	protein localization	GO_BiologicalProcess-EBI-UniProt-GOA-ACAP-ARAP_25.05.2022_00h00	0.0368565	0.0450338	[4]	Group406	5.28634	[4]	4
RRAGA	GO:0060428	intrinsic apoptotic signaling pathway in response to endoplasmic reticulum stress	GO_BiologicalProcess-EBI-UniProt-GOA-ACAP-ARAP_25.05.2022_00h00	1.28758e-05	4.10293e-05	[5, 6, 7]	Group576	20	[5	5			GO:0030154	positive regulation of ion transmembrane transporter activity	GO_BiologicalProcess-EBI-UniProt-GOA-ACAP-ARAP_25.05.2022_00h00	3.46841e-18	1.47292e-16	[5, 6]	Group525	6.62252	[5	5
PPP3CA	GO:0060428	maintenance of protein location	GO_BiologicalProcess-EBI-UniProt-GOA-ACAP-ARAP_25.05.2022_00h00	1.28758e-05	4.10293e-05	[5, 6, 7]	Group552	20	[5	5			GO:0008284	learning or memory	GO_BiologicalProcess-EBI-UniProt-GOA-ACAP-ARAP_25.05.2022_00h00	7.24599e-17	2.16361e-15	[5, 6]	Group525	6.68003	[5	5
PFDN2	GO:0060428	positive regulation of ATP metabolic process	GO_BiologicalProcess-EBI-UniProt-GOA-ACAP-ARAP_25.05.2022_00h00	1.28758e-05	4.10293e-05	[5, 6, 7]	Group586	20	[5	5			GO:0035295	leukocyte adhesion to vascular endothelial cell	GO_BiologicalProcess-EBI-UniProt-GOA-ACAP-ARAP_25.05.2022_00h00	2.88525e-16	7.35162e-15	[5, 6]	Group490	6.50773	[5	5
NUCKS1	GO:0060428	positive regulation of cartilage development	GO_BiologicalProcess-EBI-UniProt-GOA-ACAP-ARAP_25.05.2022_00h00	1.28758e-05	4.10293e-05	[5, 6, 7]	Group579	20	[5	5			GO:0031324	epithelial cell proliferation involved in lung morphogenesis	GO_BiologicalProcess-EBI-UniProt-GOA-ACAP-ARAP_25.05.2022_00h00	3.82559e-14	7.38455e-13	[5, 6, 7]	Group521	6.20556	[5	5
INA	GO:0060428	positive regulation of response to endoplasmic reticulum stress	GO_BiologicalProcess-EBI-UniProt-GOA-ACAP-ARAP_25.05.2022_00h00	1.28758e-05	4.10293e-05	[5, 6, 7]	Group583	20	[5	5			GO:0046324	nitric-oxide synthase regulator activity	GO_BiologicalProcess-EBI-UniProt-GOA-ACAP-ARAP_25.05.2022_00h00	3.82559e-14	7.38455e-13	[5, 6, 7]	Group524	6.20556	[5	5
EIF4G2	GO:0060428	sister chromatid segregation	GO_BiologicalProcess-EBI-UniProt-GOA-ACAP-ARAP_25.05.2022_00h00	1.28758e-05	4.10293e-05	[5, 6, 7]	Group565	20	[5	5			GO:0048518	modification of synaptic structure	GO_BiologicalProcess-EBI-UniProt-GOA-ACAP-ARAP_25.05.2022_00h00	5.1984e-13	7.64165e-12	[5, 6]	Group525	5.85106	[5	5
TMBIM6	GO:0070647	negative regulation of cell development	GO_BiologicalProcess-EBI-UniProt-GOA-ACAP-ARAP_25.05.2022_00h00	1.35496e-05	4.29794e-05	[5, 6]	Group581	5.77819	[5	5			GO:0043149	regulation of cell differentiation	GO_BiologicalProcess-EBI-UniProt-GOA-ACAP-ARAP_25.05.2022_00h00	1.01857e-11	1.11867e-10	[5, 6, 7]	Group513	10.6061	[5	5
TUBA1B	GO:0006605	enzyme activator activity	GO_BiologicalProcess-EBI-UniProt-GOA-ACAP-ARAP_25.05.2022_00h00	1.61183e-05	5.02852e-05	[5, 6, 7, 8]	Group518	8.10811	[5	5			GO:0031399	generation of neurons	GO_BiologicalProcess-EBI-UniProt-GOA-ACAP-ARAP_25.05.2022_00h00	1.2783e-11	1.38013e-10	[5, 6, 7, 9]	Group516	14.4509	[5	5
GABARAPL1	GO:0006605	regulation of release of cytochrome c from mitochondria	GO_BiologicalProcess-EBI-UniProt-GOA-ACAP-ARAP_25.05.2022_00h00	1.61183e-05	5.02852e-05	[5, 6, 7, 8]	Group577	8.10811	[5	5			GO:0001667	regulation of focal adhesion assembly	GO_BiologicalProcess-EBI-UniProt-GOA-ACAP-ARAP_25.05.2022_00h00	1.2783e-11	1.38013e-10	[5, 6, 7, 9]	Group468	14.4509	[5	5
TOMM20	GO:0006605	regulation of smooth muscle cell migration	GO_BiologicalProcess-EBI-UniProt-GOA-ACAP-ARAP_25.05.2022_00h00	1.61183e-05	5.02852e-05	[5, 6, 7, 8]	Group424	8.10811	[5	5			GO:0048534	positive regulation of protein dephosphorylation	GO_BiologicalProcess-EBI-UniProt-GOA-ACAP-ARAP_25.05.2022_00h00	1.59431e-11	1.65583e-10	[5, 7, 8]	Group349	7.13436	[5	5
YWHAZ	GO:0032273	skin morphogenesis	GO_BiologicalProcess-EBI-UniProt-GOA-ACAP-ARAP_25.05.2022_00h00	1.88822e-05	5.8039e-05	[5, 6, 7, 8]	Group584	13.2653	[5	5			GO:1901654	positive regulation of signaling	GO_BiologicalProcess-EBI-UniProt-GOA-ACAP-ARAP_25.05.2022_00h00	1.59431e-11	1.65583e-10	[5, 7, 8]	Group284	7.13436	[5	5
PTN	GO:0032273	very long-chain fatty acid biosynthetic process	GO_BiologicalProcess-EBI-UniProt-GOA-ACAP-ARAP_25.05.2022_00h00	1.88822e-05	5.8039e-05	[5, 6, 7, 8]	Group356	13.2653	[5	5			GO:0031330	regulation of oligodendrocyte differentiation	GO_BiologicalProcess-EBI-UniProt-GOA-ACAP-ARAP_25.05.2022_00h00	1.59431e-11	1.65583e-10	[5, 7, 8]	Group525	7.13436	[5	5
MALAT1	GO:1902806	cellular response to carbohydrate stimulus	GO_BiologicalProcess-EBI-UniProt-GOA-ACAP-ARAP_25.05.2022_00h00	2.26193e-05	6.75337e-05	[5, 6, 7]	Group587	9.79381	[5	5			GO:0150116	response to organic substance	GO_BiologicalProcess-EBI-UniProt-GOA-ACAP-ARAP_25.05.2022_00h00	1.74879e-08	9.5484e-08	[5, 6, 8, 9, 10]	Group496	7.08402	[5	5
MEG3	GO:1902806	negative regulation of Wnt signaling pathway	GO_BiologicalProcess-EBI-UniProt-GOA-ACAP-ARAP_25.05.2022_00h00	2.26193e-05	6.75337e-05	[5, 6, 7]	Group585	9.79381	[5	5			GO:0031663	calcium channel regulator activity	GO_BiologicalProcess-EBI-UniProt-GOA-ACAP-ARAP_25.05.2022_00h00	4.4571e-08	2.27134e-07	[5, 6, 7, 8]	Group381	7.36434	[5	5
DDX17	GO:1903358	endoplasmic reticulum to Golgi vesicle-mediated transport	GO_BiologicalProcess-EBI-UniProt-GOA-ACAP-ARAP_25.05.2022_00h00	2.30104e-05	6.86034e-05	[5, 6]	Group261	31.5789	[5	5			GO:0031058	negative regulation of NF-kappaB transcription factor activity	GO_BiologicalProcess-EBI-UniProt-GOA-ACAP-ARAP_25.05.2022_00h00	4.4571e-08	2.27134e-07	[5, 6, 7, 8]	Group523	7.36434	[5	5
GJA1	GO:1903358	maintenance of protein location in cell	GO_BiologicalProcess-EBI-UniProt-GOA-ACAP-ARAP_25.05.2022_00h00	2.30104e-05	6.86034e-05	[5, 6]	Group300	31.5789	[5	5			GO:0010646	tumor necrosis factor-mediated signaling pathway	GO_BiologicalProcess-EBI-UniProt-GOA-ACAP-ARAP_25.05.2022_00h00	4.4571e-08	2.27134e-07	[5, 6, 7, 8]	Group387	7.36434	[5	5
NDUFA4	GO:1903358	positive regulation of osteoblast differentiation	GO_BiologicalProcess-EBI-UniProt-GOA-ACAP-ARAP_25.05.2022_00h00	2.30104e-05	6.86034e-05	[5, 6]	Group555	31.5789	[5	5			GO:0042593	cell fate commitment	GO_BiologicalProcess-EBI-UniProt-GOA-ACAP-ARAP_25.05.2022_00h00	4.51587e-08	2.28908e-07	[5, 6, 7]	Group523	9.52381	[5	5
ATP1A1	GO:0071383	aortic valve development	GO_BiologicalProcess-EBI-UniProt-GOA-ACAP-ARAP_25.05.2022_00h00	2.31741e-05	6.89927e-05	[5, 6]	Group530	9.17031	[5	5			GO:0110053	regulation of programmed cell death	GO_BiologicalProcess-EBI-UniProt-GOA-ACAP-ARAP_25.05.2022_00h00	6.88517e-08	3.40869e-07	[5, 6, 7, 8]	Group495	8.83281	[5	5
RHOA	GO:0071383	glandular epithelial cell development	GO_BiologicalProcess-EBI-UniProt-GOA-ACAP-ARAP_25.05.2022_00h00	2.31741e-05	6.89927e-05	[5, 6]	Group505	9.17031	[5	5			GO:0031099	cellular response to nerve growth factor stimulus	GO_BiologicalProcess-EBI-UniProt-GOA-ACAP-ARAP_25.05.2022_00h00	7.55298e-08	3.70096e-07	[5, 6, 7, 8, 9, 10, 11, 12]	Group515	15.3061	[5	5
RAC1	GO:0071383	microtubule nucleation	GO_BiologicalProcess-EBI-UniProt-GOA-ACAP-ARAP_25.05.2022_00h00	2.31741e-05	6.89927e-05	[5, 6]	Group578	9.17031	[5	5			GO:0060284	canonical Wnt signaling pathway	GO_BiologicalProcess-EBI-UniProt-GOA-ACAP-ARAP_25.05.2022_00h00	8.79653e-08	4.21308e-07	[5, 6, 7]	Group498	10.1322	[5	5
GHITM	GO:0071383	regulation of DNA binding	GO_BiologicalProcess-EBI-UniProt-GOA-ACAP-ARAP_25.05.2022_00h00	2.31741e-05	6.89927e-05	[5, 6]	Group587	9.17031	[5	5			GO:0048519	negative regulation of cellular senescence	GO_BiologicalProcess-EBI-UniProt-GOA-ACAP-ARAP_25.05.2022_00h00	8.79653e-08	4.21308e-07	[5, 6, 7]	Group320	10.1322	[5	5
HTRA1	GO:0004861	positive regulation of pseudopodium assembly	GO_BiologicalProcess-EBI-UniProt-GOA-ACAP-ARAP_25.05.2022_00h00	2.45384e-05	7.27426e-05	[5, 6, 7, 8, 9, 10, 11, 12, 13]	Group585	41.6667	[5	5			GO:0033044	striated muscle cell differentiation	GO_BiologicalProcess-EBI-UniProt-GOA-ACAP-ARAP_25.05.2022_00h00	1.68795e-07	7.44959e-07	[5, 6, 7]	Group524	7.90816	[5	5
BASP1	GO:0004861	regulation of keratinocyte migration	GO_BiologicalProcess-EBI-UniProt-GOA-ACAP-ARAP_25.05.2022_00h00	2.45384e-05	7.27426e-05	[5, 6, 7, 8, 9, 10, 11, 12, 13]	Group587	41.6667	[5	5			GO:0048513	Golgi to vacuole transport	GO_BiologicalProcess-EBI-UniProt-GOA-ACAP-ARAP_25.05.2022_00h00	2.33033e-07	9.96257e-07	[5, 6]	Group404	10.7527	[5	5
GNAS	GO:0004861	regulation of protein tyrosine kinase activity	GO_BiologicalProcess-EBI-UniProt-GOA-ACAP-ARAP_25.05.2022_00h00	2.45384e-05	7.27426e-05	[5, 6, 7, 8, 9, 10, 11, 12, 13]	Group407	41.6667	[5	5			GO:0033554	carboxylic acid transmembrane transport	GO_BiologicalProcess-EBI-UniProt-GOA-ACAP-ARAP_25.05.2022_00h00	2.79343e-07	1.17842e-06	[5, 6, 7]	Group510	8.46395	[5	5
GPM6B	GO:0004861	response to parathyroid hormone	GO_BiologicalProcess-EBI-UniProt-GOA-ACAP-ARAP_25.05.2022_00h00	2.45384e-05	7.27426e-05	[5, 6, 7, 8, 9, 10, 11, 12, 13]	Group500	41.6667	[5	5			GO:0030234	microtubule cytoskeleton organization involved in mitosis	GO_BiologicalProcess-EBI-UniProt-GOA-ACAP-ARAP_25.05.2022_00h00	2.79343e-07	1.17842e-06	[5, 6, 7]	Group527	8.46395	[5	5
SPARC	GO:0043618	endocrine system development	GO_BiologicalProcess-EBI-UniProt-GOA-ACAP-ARAP_25.05.2022_00h00	2.65542e-05	7.80521e-05	[5, 7, 8, 9, 10, 11, 12]	Group560	18.3673	[5	5			GO:0002521	trachea development	GO_BiologicalProcess-EBI-UniProt-GOA-ACAP-ARAP_25.05.2022_00h00	1.27045e-06	4.6069e-06	[5, 6]	Group468	17.1875	[5	5
RTN3	GO:0043618	postsynapse organization	GO_BiologicalProcess-EBI-UniProt-GOA-ACAP-ARAP_25.05.2022_00h00	2.65542e-05	7.80521e-05	[5, 7, 8, 9, 10, 11, 12]	Group537	18.3673	[5	5			GO:0030182	neuron death in response to oxidative stress	GO_BiologicalProcess-EBI-UniProt-GOA-ACAP-ARAP_25.05.2022_00h00	1.47479e-06	5.28766e-06	[5, 6, 7]	Group139	5.45635	[5	5
PTMS	GO:0042987	regulation of carbohydrate biosynthetic process	GO_BiologicalProcess-EBI-UniProt-GOA-ACAP-ARAP_25.05.2022_00h00	2.69661e-05	7.90399e-05	[5, 6]	Group205	16.3934	[5	5			GO:0050808	regulation of proton transport	GO_BiologicalProcess-EBI-UniProt-GOA-ACAP-ARAP_25.05.2022_00h00	1.64867e-06	5.84528e-06	[5, 6, 7]	Group512	7.39796	[5	5
SCD	GO:0017015	negative regulation of peptidyl-tyrosine phosphorylation	GO_BiologicalProcess-EBI-UniProt-GOA-ACAP-ARAP_25.05.2022_00h00	2.73193e-05	7.98505e-05	[5, 6, 7, 8, 9]	Group583	10.8844	[5	5			GO:0070887	regulation of RNA metabolic process	GO_BiologicalProcess-EBI-UniProt-GOA-ACAP-ARAP_25.05.2022_00h00	1.64867e-06	5.84528e-06	[5, 6, 7]	Group478	7.39796	[5	5
APP	GO:0017015	regulation of ATP metabolic process	GO_BiologicalProcess-EBI-UniProt-GOA-ACAP-ARAP_25.05.2022_00h00	2.73193e-05	7.98505e-05	[5, 6, 7, 8, 9]	Group574	10.8844	[5	5			GO:0072359	telomerase activity	GO_BiologicalProcess-EBI-UniProt-GOA-ACAP-ARAP_25.05.2022_00h00	1.64867e-06	5.84528e-06	[5, 6, 7]	Group225	7.39796	[5	5
NDRG2	GO:1900180	nucleotide-excision repair	GO_BiologicalProcess-EBI-UniProt-GOA-ACAP-ARAP_25.05.2022_00h00	2.97178e-05	8.63764e-05	[5, 6, 7]	Group577	10.8108	[5	5			GO:0008064	positive regulation of DNA biosynthetic process	GO_BiologicalProcess-EBI-UniProt-GOA-ACAP-ARAP_25.05.2022_00h00	3.76357e-06	1.23365e-05	[5, 6]	Group515	11.3636	[5	5
ATP5B	GO:0006260	endodeoxyribonuclease activity, producing 5'-phosphomonoesters	GO_BiologicalProcess-EBI-UniProt-GOA-ACAP-ARAP_25.05.2022_00h00	3.23495e-05	9.32453e-05	[5, 6, 7]	Group561	8.11688	[5	5			GO:0061564	positive regulation of hydrolase activity	GO_BiologicalProcess-EBI-UniProt-GOA-ACAP-ARAP_25.05.2022_00h00	3.80291e-06	1.24441e-05	[5, 6, 7, 8]	Group252	9.35961	[5	5
EEF1A2	GO:0006260	radial glial cell differentiation	GO_BiologicalProcess-EBI-UniProt-GOA-ACAP-ARAP_25.05.2022_00h00	3.23495e-05	9.32453e-05	[5, 6, 7]	Group335	8.11688	[5	5			GO:0042594	regulation of ion transport	GO_BiologicalProcess-EBI-UniProt-GOA-ACAP-ARAP_25.05.2022_00h00	3.80291e-06	1.24441e-05	[5, 6, 7, 8]	Group523	9.35961	[5	5
PSAP	GO:0006260	regulation of lymphocyte proliferation	GO_BiologicalProcess-EBI-UniProt-GOA-ACAP-ARAP_25.05.2022_00h00	3.23495e-05	9.32453e-05	[5, 6, 7]	Group121	8.11688	[5	5			GO:0051651	regulation of protein localization	GO_BiologicalProcess-EBI-UniProt-GOA-ACAP-ARAP_25.05.2022_00h00	3.80291e-06	1.24441e-05	[5, 6, 7, 8]	Group142	9.35961	[5	5
PEA15	GO:0006260	synaptic vesicle clustering	GO_BiologicalProcess-EBI-UniProt-GOA-ACAP-ARAP_25.05.2022_00h00	3.23495e-05	9.32453e-05	[5, 6, 7]	Group492	8.11688	[5	5			GO:0046320	cellular response to hydrogen peroxide	GO_BiologicalProcess-EBI-UniProt-GOA-ACAP-ARAP_25.05.2022_00h00	4.65751e-06	1.49337e-05	[5, 6, 7]	Group481	10.0592	[5	5
HSP90AB1	GO:0046822	neural crest formation	GO_BiologicalProcess-EBI-UniProt-GOA-ACAP-ARAP_25.05.2022_00h00	3.29032e-05	9.44495e-05	[5, 6, 7]	Group472	11.8644	[5	5			GO:0030099	enzyme-linked receptor protein signaling pathway	GO_BiologicalProcess-EBI-UniProt-GOA-ACAP-ARAP_25.05.2022_00h00	6.02986e-06	1.89213e-05	[5, 6, 7]	Group294	33.3333	[5	5
PEBP1	GO:0010595	positive regulation of chemokine (C-X-C motif) ligand 2 production	GO_BiologicalProcess-EBI-UniProt-GOA-ACAP-ARAP_25.05.2022_00h00	3.29032e-05	9.44495e-05	[5, 6, 7, 8]	Group428	11.8644	[5	5			GO:0051129	lung epithelium development	GO_BiologicalProcess-EBI-UniProt-GOA-ACAP-ARAP_25.05.2022_00h00	6.02986e-06	1.89213e-05	[5, 6, 7]	Group203	33.3333	[5	5
ACTB	GO:0046822	regulation of cellular response to hypoxia	GO_BiologicalProcess-EBI-UniProt-GOA-ACAP-ARAP_25.05.2022_00h00	3.29032e-05	9.44495e-05	[5, 6, 7]	Group577	11.8644	[5	5			GO:0043410	negative regulation of metabolic process	GO_BiologicalProcess-EBI-UniProt-GOA-ACAP-ARAP_25.05.2022_00h00	7.96894e-06	2.43269e-05	[5, 6, 7, 8, 9]	Group236	6.51731	[5	5
	GO:0010595	regulation of establishment of planar polarity involved in neural tube closure	GO_BiologicalProcess-EBI-UniProt-GOA-ACAP-ARAP_25.05.2022_00h00	3.29032e-05	9.44495e-05	[5, 6, 7, 8]	Group587	11.8644	[5	5			GO:0010628	regulation of cysteine-type endopeptidase activity	GO_BiologicalProcess-EBI-UniProt-GOA-ACAP-ARAP_25.05.2022_00h00	7.96894e-06	2.43269e-05	[5, 6, 7, 8, 9]	Group353	6.51731	[5	5
	GO:0046822	UV protection	GO_BiologicalProcess-EBI-UniProt-GOA-ACAP-ARAP_25.05.2022_00h00	3.29032e-05	9.44495e-05	[5, 6, 7]	Group401	11.8644	[5	5			GO:0061061	cellular response to amyloid-beta	GO_BiologicalProcess-EBI-UniProt-GOA-ACAP-ARAP_25.05.2022_00h00	8.13344e-06	2.475e-05	[5, 6]	Group385	15.873	[5	5
	GO:0006611	animal organ regeneration	GO_BiologicalProcess-EBI-UniProt-GOA-ACAP-ARAP_25.05.2022_00h00	4.14642e-05	0.000116457	[5, 6, 7, 8]	Group472	15.625	[5	5			GO:0071417	cellular response to ketone	GO_BiologicalProcess-EBI-UniProt-GOA-ACAP-ARAP_25.05.2022_00h00	8.19964e-06	2.49118e-05	[5, 6, 7]	Group430	8.8785	[5	5
	GO:0006611	cytokine production involved in immune response	GO_BiologicalProcess-EBI-UniProt-GOA-ACAP-ARAP_25.05.2022_00h00	4.14642e-05	0.000116457	[5, 6, 7, 8]	Group238	15.625	[5	5			GO:0044092	axon extension	GO_BiologicalProcess-EBI-UniProt-GOA-ACAP-ARAP_25.05.2022_00h00	8.43579e-06	2.55076e-05	[5, 6]	Group522	8.54701	[5	5
	GO:0006611	fatty acid derivative metabolic process	GO_BiologicalProcess-EBI-UniProt-GOA-ACAP-ARAP_25.05.2022_00h00	4.14642e-05	0.000116457	[5, 6, 7, 8]	Group577	15.625	[5	5			GO:0009411	heterocycle metabolic process	GO_BiologicalProcess-EBI-UniProt-GOA-ACAP-ARAP_25.05.2022_00h00	1.0598e-05	3.15464e-05	[5, 7]	Group296	12.766	[5	5
	GO:0006611	positive regulation of lymphocyte activation	GO_BiologicalProcess-EBI-UniProt-GOA-ACAP-ARAP_25.05.2022_00h00	4.14642e-05	0.000116457	[5, 6, 7, 8]	Group401	15.625	[5	5			GO:0051101	myoblast differentiation	GO_BiologicalProcess-EBI-UniProt-GOA-ACAP-ARAP_25.05.2022_00h00	1.0598e-05	3.15464e-05	[5, 7]	Group274	12.766	[5	5
	GO:0006611	regulation of cytokine production involved in immune response	GO_BiologicalProcess-EBI-UniProt-GOA-ACAP-ARAP_25.05.2022_00h00	4.14642e-05	0.000116457	[5, 6, 7, 8]	Group286	15.625	[5	5			GO:0007399	regulation of epithelial to mesenchymal transition	GO_BiologicalProcess-EBI-UniProt-GOA-ACAP-ARAP_25.05.2022_00h00	1.0598e-05	3.15464e-05	[5, 7]	Group515	12.766	[5	5
	GO:0006611	smooth muscle cell migration	GO_BiologicalProcess-EBI-UniProt-GOA-ACAP-ARAP_25.05.2022_00h00	4.14642e-05	0.000116457	[5, 6, 7, 8]	Group570	15.625	[5	5			GO:0106027	negative regulation of cell motility	GO_BiologicalProcess-EBI-UniProt-GOA-ACAP-ARAP_25.05.2022_00h00	1.08431e-05	3.21257e-05	[5, 6, 7]	Group153	15.3846	[5	5
	GO:0070371	regulation of cytokine production	GO_BiologicalProcess-EBI-UniProt-GOA-ACAP-ARAP_25.05.2022_00h00	4.79858e-05	0.000132982	[5, 6, 7]	Group587	7.69231	[5	5			GO:0043276	regulation of mitotic cell cycle	GO_BiologicalProcess-EBI-UniProt-GOA-ACAP-ARAP_25.05.2022_00h00	1.08431e-05	3.21257e-05	[5, 6, 7]	Group515	15.3846	[5	5
	GO:0007519	negative regulation of gene expression, epigenetic	GO_BiologicalProcess-EBI-UniProt-GOA-ACAP-ARAP_25.05.2022_00h00	5.37048e-05	0.000146493	[5, 6]	Group307	9.88372	[5	5			GO:0010812	positive regulation of developmental process	GO_BiologicalProcess-EBI-UniProt-GOA-ACAP-ARAP_25.05.2022_00h00	1.43702e-05	4.11715e-05	[5, 6, 7]	Group516	8.86699	[5	5
	GO:0007519	stem cell development	GO_BiologicalProcess-EBI-UniProt-GOA-ACAP-ARAP_25.05.2022_00h00	5.37048e-05	0.000146493	[5, 6]	Group420	9.88372	[5	5			GO:2001259	positive regulation of phosphate metabolic process	GO_BiologicalProcess-EBI-UniProt-GOA-ACAP-ARAP_25.05.2022_00h00	1.4678e-05	4.19278e-05	[5, 6, 7, 8]	Group446	12.3711	[5	5
	GO:0014037	attachment of spindle microtubules to kinetochore	GO_BiologicalProcess-EBI-UniProt-GOA-ACAP-ARAP_25.05.2022_00h00	5.67587e-05	0.000154218	[5, 6, 7, 8, 9]	Group442	19.0476	[5	5			GO:0009790	lymphocyte apoptotic process	GO_BiologicalProcess-EBI-UniProt-GOA-ACAP-ARAP_25.05.2022_00h00	1.68745e-05	4.75622e-05	[5, 6, 7, 8, 9, 10, 11, 12, 13, 14, 15, 16, 17]	Group527	38.4615	[5	5
	GO:0014037	positive regulation of cell activation	GO_BiologicalProcess-EBI-UniProt-GOA-ACAP-ARAP_25.05.2022_00h00	5.67587e-05	0.000154218	[5, 6, 7, 8, 9]	Group272	19.0476	[5	5			GO:1902961	post-translational protein modification	GO_BiologicalProcess-EBI-UniProt-GOA-ACAP-ARAP_25.05.2022_00h00	1.68745e-05	4.75622e-05	[5, 6, 7, 8, 9, 10, 11, 12, 13, 14, 15, 16, 17]	Group458	38.4615	[5	5
	GO:0008306	cell activation involved in immune response	GO_BiologicalProcess-EBI-UniProt-GOA-ACAP-ARAP_25.05.2022_00h00	5.77562e-05	0.000156317	[5, 7]	Group488	12.766	[5	5			GO:0003713	regulation of leukocyte activation	GO_BiologicalProcess-EBI-UniProt-GOA-ACAP-ARAP_25.05.2022_00h00	1.68745e-05	4.75622e-05	[5, 6, 7, 8, 9, 10, 11, 12, 13, 14, 15, 16, 17]	Group518	38.4615	[5	5
	GO:0008306	centrosome duplication	GO_BiologicalProcess-EBI-UniProt-GOA-ACAP-ARAP_25.05.2022_00h00	5.77562e-05	0.000156317	[5, 7]	Group506	12.766	[5	5			GO:0019725	locomotory exploration behavior	GO_BiologicalProcess-EBI-UniProt-GOA-ACAP-ARAP_25.05.2022_00h00	1.8106e-05	5.05856e-05	[5, 6, 7, 8, 9]	Group495	12.1212	[5	5
	GO:0008306	negative regulation of stem cell differentiation	GO_BiologicalProcess-EBI-UniProt-GOA-ACAP-ARAP_25.05.2022_00h00	5.77562e-05	0.000156317	[5, 7]	Group526	12.766	[5	5			GO:0072542	negative regulation of chromosome organization	GO_BiologicalProcess-EBI-UniProt-GOA-ACAP-ARAP_25.05.2022_00h00	1.81777e-05	5.07118e-05	[5, 6]	Group233	6.02007	[5	5
	GO:0008306	sphingolipid metabolic process	GO_BiologicalProcess-EBI-UniProt-GOA-ACAP-ARAP_25.05.2022_00h00	5.77562e-05	0.000156317	[5, 7]	Group307	12.766	[5	5			GO:0051017	positive regulation of nucleobase-containing compound metabolic process	GO_BiologicalProcess-EBI-UniProt-GOA-ACAP-ARAP_25.05.2022_00h00	2.28815e-05	6.24664e-05	[5, 6, 7, 8, 9, 10, 11]	Group435	7.32484	[5	5
	GO:0016570	negative regulation of cytoskeleton organization	GO_BiologicalProcess-EBI-UniProt-GOA-ACAP-ARAP_25.05.2022_00h00	5.96001e-05	0.000159649	[5, 6]	Group508	6.71642	[5	5			GO:0060396	regulation of cell cycle phase transition	GO_BiologicalProcess-EBI-UniProt-GOA-ACAP-ARAP_25.05.2022_00h00	2.28815e-05	6.24664e-05	[5, 6, 7, 8, 9, 10, 11]	Group526	7.32484	[5	5
	GO:0016570	retina development in camera-type eye	GO_BiologicalProcess-EBI-UniProt-GOA-ACAP-ARAP_25.05.2022_00h00	5.96001e-05	0.000159649	[5, 6]	Group410	6.71642	[5	5			GO:0043085	glial cell fate commitment	GO_BiologicalProcess-EBI-UniProt-GOA-ACAP-ARAP_25.05.2022_00h00	2.41188e-05	6.55633e-05	[5, 6, 7, 8, 9, 10, 11]	Group521	15.7895	[5	5
	GO:0042307	regulation of neuronal synaptic plasticity	GO_BiologicalProcess-EBI-UniProt-GOA-ACAP-ARAP_25.05.2022_00h00	6.77463e-05	0.000179851	[5, 6, 7, 8, 9, 10]	Group577	18.6047	[5	5			GO:0046777	cell part morphogenesis	GO_BiologicalProcess-EBI-UniProt-GOA-ACAP-ARAP_25.05.2022_00h00	2.69391e-05	7.27127e-05	[5, 6, 7, 8, 9]	Group498	21.2121	[5	5
	GO:2000008	synaptic vesicle recycling	GO_BiologicalProcess-EBI-UniProt-GOA-ACAP-ARAP_25.05.2022_00h00	6.77463e-05	0.000179851	[5, 6]	Group180	18.6047	[5	5			GO:0010941	cell morphogenesis	GO_BiologicalProcess-EBI-UniProt-GOA-ACAP-ARAP_25.05.2022_00h00	3.29431e-05	8.74365e-05	[5, 6, 7]	Group444	6.49652	[5	5
	GO:2000008	T cell differentiation involved in immune response	GO_BiologicalProcess-EBI-UniProt-GOA-ACAP-ARAP_25.05.2022_00h00	6.77463e-05	0.000179851	[5, 6]	Group491	18.6047	[5	5			GO:0010975	alpha-beta T cell lineage commitment	GO_BiologicalProcess-EBI-UniProt-GOA-ACAP-ARAP_25.05.2022_00h00	4.43005e-05	0.000113941	[5, 6]	Group371	5.97015	[5	5
	GO:1904031	cellular component assembly involved in morphogenesis	GO_BiologicalProcess-EBI-UniProt-GOA-ACAP-ARAP_25.05.2022_00h00	7.98166e-05	0.000208705	[5, 6, 7, 8, 9, 10, 11]	Group585	16.0714	[5	5			GO:0048168	Golgi vesicle transport	GO_BiologicalProcess-EBI-UniProt-GOA-ACAP-ARAP_25.05.2022_00h00	4.43005e-05	0.000113941	[5, 6]	Group382	5.97015	[5	5
	GO:1904031	cytoskeleton-dependent intracellular transport	GO_BiologicalProcess-EBI-UniProt-GOA-ACAP-ARAP_25.05.2022_00h00	7.98166e-05	0.000208705	[5, 6, 7, 8, 9, 10, 11]	Group507	16.0714	[5	5			GO:0006325	response to hydrogen peroxide	GO_BiologicalProcess-EBI-UniProt-GOA-ACAP-ARAP_25.05.2022_00h00	4.43005e-05	0.000113941	[5, 6]	Group482	5.97015	[5	5
	GO:1904031	fibroblast growth factor receptor signaling pathway	GO_BiologicalProcess-EBI-UniProt-GOA-ACAP-ARAP_25.05.2022_00h00	7.98166e-05	0.000208705	[5, 6, 7, 8, 9, 10, 11]	Group587	16.0714	[5	5			GO:0010035	detection of calcium ion	GO_BiologicalProcess-EBI-UniProt-GOA-ACAP-ARAP_25.05.2022_00h00	4.45972e-05	0.00011455	[5, 6]	Group184	9.25926	[5	5
	GO:1904031	inflammatory response	GO_BiologicalProcess-EBI-UniProt-GOA-ACAP-ARAP_25.05.2022_00h00	7.98166e-05	0.000208705	[5, 6, 7, 8, 9, 10, 11]	Group490	16.0714	[5	5			GO:0048468	mitotic nuclear division	GO_BiologicalProcess-EBI-UniProt-GOA-ACAP-ARAP_25.05.2022_00h00	7.04752e-05	0.000172443	[5, 6, 7]	Group378	13.8462	[5	5
	GO:1904031	positive regulation of lymphocyte proliferation	GO_BiologicalProcess-EBI-UniProt-GOA-ACAP-ARAP_25.05.2022_00h00	7.98166e-05	0.000208705	[5, 6, 7, 8, 9, 10, 11]	Group500	16.0714	[5	5			GO:0033674	localization within membrane	GO_BiologicalProcess-EBI-UniProt-GOA-ACAP-ARAP_25.05.2022_00h00	7.11391e-05	0.000173623	[5, 6, 7]	Group527	7.86026	[5	5
	GO:0014015	muscle system process	GO_BiologicalProcess-EBI-UniProt-GOA-ACAP-ARAP_25.05.2022_00h00	9.10194e-05	0.000234178	[5, 6, 7, 8, 9]	Group515	14.2857	[5	5			GO:0031401	protein-containing complex assembly	GO_BiologicalProcess-EBI-UniProt-GOA-ACAP-ARAP_25.05.2022_00h00	7.11391e-05	0.000173623	[5, 6, 7]	Group526	7.86026	[5	5
	GO:0014015	regulation of heart growth	GO_BiologicalProcess-EBI-UniProt-GOA-ACAP-ARAP_25.05.2022_00h00	9.10194e-05	0.000234178	[5, 6, 7, 8, 9]	Group587	14.2857	[5	5			GO:0044085	regulation of cytoskeleton organization	GO_BiologicalProcess-EBI-UniProt-GOA-ACAP-ARAP_25.05.2022_00h00	8.13355e-05	0.000195512	[5, 6, 7, 8]	Group472	6.11814	[5	5
	GO:0014015	response to calcium ion	GO_BiologicalProcess-EBI-UniProt-GOA-ACAP-ARAP_25.05.2022_00h00	9.10194e-05	0.000234178	[5, 6, 7, 8, 9]	Group358	14.2857	[5	5			GO:0061323	hippocampus development	GO_BiologicalProcess-EBI-UniProt-GOA-ACAP-ARAP_25.05.2022_00h00	8.2025e-05	0.000196922	[5, 6, 7, 8, 9, 10, 11]	Group527	75	[5	5
	GO:0014015	vesicle docking	GO_BiologicalProcess-EBI-UniProt-GOA-ACAP-ARAP_25.05.2022_00h00	9.10194e-05	0.000234178	[5, 6, 7, 8, 9]	Group576	14.2857	[5	5			GO:0051240	negative regulation of telomere maintenance via telomere lengthening	GO_BiologicalProcess-EBI-UniProt-GOA-ACAP-ARAP_25.05.2022_00h00	8.2025e-05	0.000196922	[5, 6, 7, 8, 9, 10, 11]	Group509	75	[5	5
	GO:2001243	positive regulation of transforming growth factor beta receptor signaling pathway	GO_BiologicalProcess-EBI-UniProt-GOA-ACAP-ARAP_25.05.2022_00h00	9.43171e-05	0.000240878	[5, 6, 7, 8, 9]	Group551	11.4035	[5	5			GO:0032990	neural crest cell development	GO_BiologicalProcess-EBI-UniProt-GOA-ACAP-ARAP_25.05.2022_00h00	8.2025e-05	0.000196922	[5, 6, 7, 8, 9, 10, 11]	Group500	75	[5	5
	GO:2001243	regulation of cAMP-mediated signaling	GO_BiologicalProcess-EBI-UniProt-GOA-ACAP-ARAP_25.05.2022_00h00	9.43171e-05	0.000240878	[5, 6, 7, 8, 9]	Group314	11.4035	[5	5			GO:0071345	regulation of protein binding	GO_BiologicalProcess-EBI-UniProt-GOA-ACAP-ARAP_25.05.2022_00h00	8.2025e-05	0.000196922	[5, 6, 7, 8, 9, 10, 11]	Group469	75	[5	5
	GO:2001243	viral release from host cell	GO_BiologicalProcess-EBI-UniProt-GOA-ACAP-ARAP_25.05.2022_00h00	9.43171e-05	0.000240878	[5, 6, 7, 8, 9]	Group572	11.4035	[5	5			GO:0008542	glial cell proliferation	GO_BiologicalProcess-EBI-UniProt-GOA-ACAP-ARAP_25.05.2022_00h00	8.40389e-05	0.000200999	[5, 6, 7]	Group527	17.9487	[5	5
	GO:1904375	negative regulation of stress fiber assembly	GO_BiologicalProcess-EBI-UniProt-GOA-ACAP-ARAP_25.05.2022_00h00	9.61448e-05	0.000244946	[5, 6]	Group461	10.7692	[5	5			GO:0048878	leukocyte proliferation	GO_BiologicalProcess-EBI-UniProt-GOA-ACAP-ARAP_25.05.2022_00h00	8.40389e-05	0.000200999	[5, 6, 7]	Group334	17.9487	[5	5
	GO:0043123	regulation of amyloid-beta clearance	GO_BiologicalProcess-EBI-UniProt-GOA-ACAP-ARAP_25.05.2022_00h00	0.000104135	0.00026401	[5, 6, 7, 8]	Group108	9.04523	[5	5			GO:0009611	positive regulation of growth	GO_BiologicalProcess-EBI-UniProt-GOA-ACAP-ARAP_25.05.2022_00h00	8.40389e-05	0.000200999	[5, 6, 7]	Group248	17.9487	[5	5
	GO:0014002	chromatin remodeling	GO_BiologicalProcess-EBI-UniProt-GOA-ACAP-ARAP_25.05.2022_00h00	0.000111792	0.00028137	[5, 6, 7, 8, 9, 10]	Group488	17.3913	[5	5			GO:0048534	response to insulin	GO_BiologicalProcess-EBI-UniProt-GOA-ACAP-ARAP_25.05.2022_00h00	9.94641e-05	0.000235534	[5, 6, 7]	Group339	17.5	[5	5
	GO:0014002	histone acetylation	GO_BiologicalProcess-EBI-UniProt-GOA-ACAP-ARAP_25.05.2022_00h00	0.000111792	0.00028137	[5, 6, 7, 8, 9, 10]	Group442	17.3913	[5	5			GO:0031032	cell cycle G1/S phase transition	GO_BiologicalProcess-EBI-UniProt-GOA-ACAP-ARAP_25.05.2022_00h00	0.000109125	0.000255561	[5, 6]	Group226	14.8148	[5	5
	GO:0014002	phospholipid biosynthetic process	GO_BiologicalProcess-EBI-UniProt-GOA-ACAP-ARAP_25.05.2022_00h00	0.000111792	0.00028137	[5, 6, 7, 8, 9, 10]	Group446	17.3913	[5	5			GO:0015031	anatomical structure morphogenesis	GO_BiologicalProcess-EBI-UniProt-GOA-ACAP-ARAP_25.05.2022_00h00	0.000122527	0.000282107	[5, 6, 7]	Group287	6.34518	[5	5
	GO:0014002	regulation of cell shape	GO_BiologicalProcess-EBI-UniProt-GOA-ACAP-ARAP_25.05.2022_00h00	0.000111792	0.00028137	[5, 6, 7, 8, 9, 10]	Group451	17.3913	[5	5			GO:0070316	Golgi ribbon formation	GO_BiologicalProcess-EBI-UniProt-GOA-ACAP-ARAP_25.05.2022_00h00	0.000122527	0.000282107	[5, 6, 7]	Group492	6.34518	[5	5
	GO:0014002	sulfur compound metabolic process	GO_BiologicalProcess-EBI-UniProt-GOA-ACAP-ARAP_25.05.2022_00h00	0.000111792	0.00028137	[5, 6, 7, 8, 9, 10]	Group271	17.3913	[5	5			GO:0031663	calcium ion transmembrane import into cytosol	GO_BiologicalProcess-EBI-UniProt-GOA-ACAP-ARAP_25.05.2022_00h00	0.000137801	0.000312012	[5, 6]	Group247	9.28571	[5	5
	GO:0001952	extracellular matrix assembly	GO_BiologicalProcess-EBI-UniProt-GOA-ACAP-ARAP_25.05.2022_00h00	0.000113408	0.000285093	[5, 6]	Group584	10.6061	[5	5			GO:0140352	synaptic vesicle localization	GO_BiologicalProcess-EBI-UniProt-GOA-ACAP-ARAP_25.05.2022_00h00	0.000137801	0.000312012	[5, 6]	Group468	9.28571	[5	5
	GO:0001952	regulation of macrophage migration	GO_BiologicalProcess-EBI-UniProt-GOA-ACAP-ARAP_25.05.2022_00h00	0.000113408	0.000285093	[5, 6]	Group213	10.6061	[5	5			GO:0051494	positive regulation of actin filament bundle assembly	GO_BiologicalProcess-EBI-UniProt-GOA-ACAP-ARAP_25.05.2022_00h00	0.000138687	0.000313276	[5, 6, 7, 8, 9]	Group298	7.22433	[5	5
	GO:1905906	keratinocyte migration	GO_BiologicalProcess-EBI-UniProt-GOA-ACAP-ARAP_25.05.2022_00h00	0.000121312	0.000303136	[5, 6]	Group451	31.25	[5	5			GO:0090277	negative regulation of post-transcriptional gene silencing by RNA	GO_BiologicalProcess-EBI-UniProt-GOA-ACAP-ARAP_25.05.2022_00h00	0.000155671	0.000349164	[5, 6]	Group210	8.69565	[5	5
	GO:1905906	regulation of secretion by cell	GO_BiologicalProcess-EBI-UniProt-GOA-ACAP-ARAP_25.05.2022_00h00	0.000121312	0.000303136	[5, 6]	Group384	31.25	[5	5			GO:0046777	regulation of axonogenesis	GO_BiologicalProcess-EBI-UniProt-GOA-ACAP-ARAP_25.05.2022_00h00	0.000155671	0.000349164	[5, 6]	Group527	8.69565	[5	5
	GO:0036480	entry into host	GO_BiologicalProcess-EBI-UniProt-GOA-ACAP-ARAP_25.05.2022_00h00	0.000127075	0.000316775	[5, 6, 7, 8]	Group331	44.4444	[5	5			GO:0030098	regulation of B cell proliferation	GO_BiologicalProcess-EBI-UniProt-GOA-ACAP-ARAP_25.05.2022_00h00	0.000156786	0.000351252	[5, 6, 7, 8]	Group490	8.28729	[5	5
	GO:0036480	negative regulation of epithelial cell migration	GO_BiologicalProcess-EBI-UniProt-GOA-ACAP-ARAP_25.05.2022_00h00	0.000127075	0.000316775	[5, 6, 7, 8]	Group572	44.4444	[5	5			GO:0120039	regulation of sulfur metabolic process	GO_BiologicalProcess-EBI-UniProt-GOA-ACAP-ARAP_25.05.2022_00h00	0.000156786	0.000351252	[5, 6, 7, 8]	Group498	8.28729	[5	5
	GO:0036480	negative regulation of epithelial to mesenchymal transition	GO_BiologicalProcess-EBI-UniProt-GOA-ACAP-ARAP_25.05.2022_00h00	0.000127075	0.000316775	[5, 6, 7, 8]	Group399	44.4444	[5	5			GO:2000819	regulation of blood circulation	GO_BiologicalProcess-EBI-UniProt-GOA-ACAP-ARAP_25.05.2022_00h00	0.000166178	0.000370124	[5, 6, 7, 8]	Group320	8.64198	[5	5
	GO:0036480	response to UV-B	GO_BiologicalProcess-EBI-UniProt-GOA-ACAP-ARAP_25.05.2022_00h00	0.000127075	0.000316775	[5, 6, 7, 8]	Group235	44.4444	[5	5			GO:0010638	cellular response to DNA damage stimulus	GO_BiologicalProcess-EBI-UniProt-GOA-ACAP-ARAP_25.05.2022_00h00	0.00019357	0.000424698	[5, 6, 7, 8]	Group298	6.66667	[5	5
	GO:0034620	hematopoietic progenitor cell differentiation	GO_BiologicalProcess-EBI-UniProt-GOA-ACAP-ARAP_25.05.2022_00h00	0.00012878	0.000320259	[5, 6]	Group306	11.7647	[5	5			GO:0000910	cellular glucose homeostasis	GO_BiologicalProcess-EBI-UniProt-GOA-ACAP-ARAP_25.05.2022_00h00	0.000232574	0.000497704	[5, 6, 7]	Group297	10	[5	5
	GO:0034620	nuclear-transcribed mRNA catabolic process, deadenylation-dependent decay	GO_BiologicalProcess-EBI-UniProt-GOA-ACAP-ARAP_25.05.2022_00h00	0.00012878	0.000320259	[5, 6]	Group373	11.7647	[5	5			GO:0006259	cellular macromolecule catabolic process	GO_BiologicalProcess-EBI-UniProt-GOA-ACAP-ARAP_25.05.2022_00h00	0.000238492	0.000509796	[5, 6, 9, 10]	Group458	33.3333	[5	5
	GO:0043122	regulation of muscle cell differentiation	GO_BiologicalProcess-EBI-UniProt-GOA-ACAP-ARAP_25.05.2022_00h00	0.000137723	0.000339261	[5, 6, 7]	Group108	8.10811	[5	5			GO:0045321	cellular response to abiotic stimulus	GO_BiologicalProcess-EBI-UniProt-GOA-ACAP-ARAP_25.05.2022_00h00	0.000238492	0.000509796	[5, 6, 9, 10]	Group518	33.3333	[5	5
[truncated: 444 more rows]

## Sheet: Supplemental table 8
List of differentially expressed microRNAs in primary neurons treated with anti-miR-129-5p
[truncated: 334 more rows]

## Sheet: Supplemental table 9
GO analysis primary neurons treated with anti-miR-129-5p
[truncated: 68 more rows]

[truncated: 3 more sheets: Supplemental table 10, Supplemental table 11, Supplemental table 12]
